# Supplementary material for: A new twist for Stork-Danheiser products enabled by visible light mediated trans-cyclohexene formation; access to acyclic distal enones
Source: Royal Society of Chemistry journal article supplement (doi:10.1039/d1sc03774a), 2022-01-01
Supplement: d1sc03774a1.pdf [file d1sc03774a1.pdf]

## A New Twist in the Stork-Danheiser Reaction Enabled by Visible Light Mediated *Trans*-Cyclohexene Formation; Access to Acyclic Distal Enones

Erik Lantz, Roukaya El Mokadem, Tim Schoch, and Tyler Fleske, and Jimmie D. Weaver III\*

Department of Chemistry, Oklahoma State University, Stillwater, OK 74078 USA

[jimmie.weaver@okstate.edu](mailto:jimmie.weaver@okstate.edu)

### Electronic Supplementary Information

#### Table of Contents

|       |                                                |      |
|-------|------------------------------------------------|------|
| I.    | General Information                            | E2   |
| II.   | Synthesis of Substrates                        | E3   |
| III.  | List of Substrates                             | E13  |
| IV.   | General Procedure for Photocatalytic Reactions | E23  |
| V.    | List of Reaction Products                      | E24  |
| VI.   | Calculations                                   | E31  |
| VII.  | NMR and GCMS Spectra                           | E39  |
| VIII. | References                                     | E183 |

## I. General Information

Reagents were purchased from commercial suppliers including Sigma, TCI, and Oakwood chemical; they were used without further purification. ACS grade solvents were purchased from Fisher. Tetrahydrofuran (THF) used in synthesis of substrates was dried refluxing over sodium metal in a still and distillation from benzophenone ketyl indicator. Where necessary, methanol and ethanol were dried over 3Å molecular sieves.

Photocatalysts were prepared by our previously reported method.<sup>1</sup> Light-promoted reactions were performed with a TechVen Systems Lumière PR-W8 photoreactor. It is a stand-alone unit with eight individually controlled reaction stations. The unit provides up to 5 watts (at 1 W per LED) centered at 447 nm. The LEDs are stacked vertically on each module. Each reaction station is composed of borosilicate glass, which puts reaction vessels (NMR tubes) an approximate 1.5 cm distance from the light source. The reactor is cooled to 0 °C with an external chiller unit (using propylene glycol/water as the coolant). A Bellatrix PR-N2 photoreactor, the latest model from TechVen Systems, was also used in a trial run to test reaction conversion and effect of higher optical power (40 W). For more information on the photoreactors used in these experiments, visit [www.techvensystems.com](http://www.techvensystems.com).

Reaction progressions were monitored by NMR, utilizing C<sub>6</sub>D<sub>6</sub> capillaries or deuterated solvent (where necessary). Reactions were also monitored by thin-layer chromatography (TLC), on silica XHL TLC plates (UV254, glass-backed, 250 μm) from Sorbent Technologies, Inc. Synthesized compounds were purified by flash chromatography on a Teledyne ISCO Combiflash Rf, using refillable Redisep columns. The silica used was 60Å technical grade (40-63 μm) supplied by Sorbtech. Detectors were set to 254 and 280 nm; for compounds without a readily detectable chromophore, the evaporative light scattering detector (ELSD) was utilized.

NMR spectra were obtained using a 400 MHz Bruker Avance III. GCMS traces were obtained by a Shimadzu GCMS-QP2010 SE. High resolution masses were obtained by a ThermoScientific Orbitrap Fusion, operated in Orbitrap-FTMS mode (with a nominal resolution of 120,000). Melting points were obtained on a Stuart SMP10 and reported uncorrected.

## II. Synthesis of Substrates

### General Procedure A1 for Intermediate A Synthesis

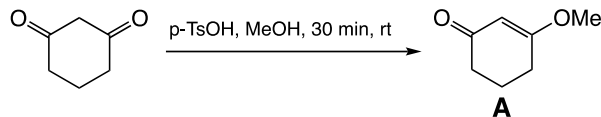

Cyclohexanedione (5.00 g, 44.6 mmol), methanol (100 mL), and a catalytic amount of p-toluenesulfonic acid (0.42 g, 2.2 mmol) were added to a round-bottom flask, equipped with a magnetic stir bar. The reaction was allowed to stir for 30 min at room temperature. The methanol was removed in vacuo. The resulting mixture was then dissolved into ethyl acetate (100 mL) and quenched by addition of saturated sodium bicarbonate solution (50 mL). Extraction was performed with ethyl acetate (3 x 50 mL). The combined organic layers were washed with deionized (DI) water (50 mL), followed by saturated sodium chloride solution (50 mL). After separating the organic layer, it was dried over magnesium sulfate ( $\text{MgSO}_4$ ), filtered and then concentrated. The crude material was purified by flash chromatography, using hexane : ethyl acetate as the eluent, the product eluted at 25% EtOAc. The reaction yielded 81% (4.56 g, 36.1 mmol) of 3-methoxycyclohex-2-en-1-one. The material was subsequently recrystallized in cyclohexane and was retained for seeding future batches.

Afterwards, the above procedure was used except that chromatographic purification could be replaced with a crystallization, albeit at reduced yield. After workup the compound could be directly isolated via crystallization from a minimal amount of hot cyclohexane using previously purified compound to seed the crystallization to afford an average yield of 48% (2.70 g, 21.4 mmol) over 8 runs.

### General Procedure B1 for Synthesis of Cyclohexenone B

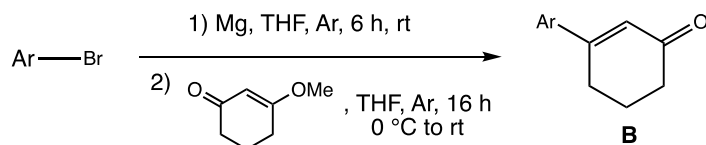

A magnetic stir bar and magnesium turnings (0.18 g, 7.5 mmol) were added to a dried two-neck round-bottom flask; following with a pinch of iodine and dried THF (0.5 M). An argon atmosphere was maintained in the flask due to the oxygen and moisture sensitivity of Grignard reactions. The mixture was allowed to stir for 20 min; then 4-bromobenzotrifluoride (1.1 mL, 7.5 mmol) was added drop-wise. After consumption of the bromide, the reaction mixture was titrated using dry THF and iodine to determine the amount of Grignard reagent formed. The reaction mixture was then cooled in an ice bath for 20 min. Methoxycyclohexenone **A** (0.77 g, 6.1 mmol, 1 equivalent with respect to the titrated amount of Grignard formed), dissolved in dried THF (1 M), was slowly added drop-wise. The ice bath was removed and the reaction mixture was allowed to warm to room temperature. The reaction was stirred until reaction completion was reached (16-24 h) as indicated by the consumption of the methoxycyclohexenone by TLC. The reaction mixture was quenched with saturated ammonium chloride solution (50 mL), then extracted with ethyl acetate (3 x 50 mL). Combined organic layers were washed with saturated sodium bicarbonate solution (50 mL), DI water (50 mL), then saturated sodium chloride solution (50 mL). The separated organic layer was then dried over MgSO<sub>4</sub>, filtered, and then concentrated in vacuo. The product mixture was purified via flash chromatography (hexane : ethyl acetate). The reaction yielded 48% (0.70 g, 2.9 mmol) of 4'-(trifluoromethyl)-5,6-dihydro-[1,1'-biphenyl]-3(4H)-one.

Alternative methods to preparation of enone **B** can be accomplished by purchasing pre-prepared Grignard reagents, or organolithium reagents. In this case, the reagents can be directly added to a cooled solution of methoxycyclohexenone in dry solvent (see procedure **D3**).

### General Procedure C1 for Synthesis of Secondary Allylic Alcohol **C**

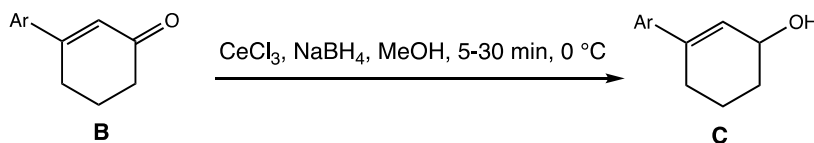

Enone **B** was reduced to the secondary allylic alcohol **C** via Luche reduction. A dried round-bottom flask, equipped with a magnetic stir bar, was added to an ice bath. 3-[4-(trifluoromethyl)phenyl]cyclohex-2-en-1-one (Enone **B**) (0.50 g, 2.1 mmol, 1 equiv), methanol (0.2 M), and a catalytic amount of cerium trichloride heptahydrate (0.08 g, 0.2 mmol) were added to the flask, and allowed to stir for 15 min. Sodium borohydride (0.12 g, 3.2 mmol, 1.5 equiv) was



then added portion-wise to the reaction mixture. Reaction progress was monitored by TLC, until enone **B** was completely consumed. The reaction was quenched by the slow addition of a minimal amount of water. The methanol was removed in vacuo, and the crude mixture was extracted with ethyl acetate (20 mL). The organic layer was dried over MgSO<sub>4</sub>, filtered, and concentrated. The crude alcohol was purified via flash chromatography (hexane : ethyl acetate) with the product eluting at 10% EtOAc. The yield of the reaction was 63% (0.32 g, 1.3 mmol) of 4'-(trifluoromethyl)-3,4,5,6-tetrahydro-[1,1'-biphenyl]-3-ol.

For substrate **5**, the same procedures were used as above; however, the intermediate was formed with 1,3-cyclopentanedione.

Table 1. Summary of various secondary alcohol substrates and their yields

| Substrate ID | Identity of Ar—Br                  | Yield (%)<br>[over three steps] |
|--------------|------------------------------------|---------------------------------|
| <b>1j</b>    | 1-bromo-4-methylbenzene            | 44                              |
| <b>1k</b>    | 1-bromo-4-(trifluoromethyl)benzene | 37                              |
| <b>1l</b>    | bromobenzene                       | 45                              |
| <b>1m</b>    | 1-bromo-4-methoxybenzene           | 30                              |
| <b>5</b>     | bromobenzene                       | 33                              |

### General Procedure D1 for Synthesis of Tertiary Allylic Alcohol **D**

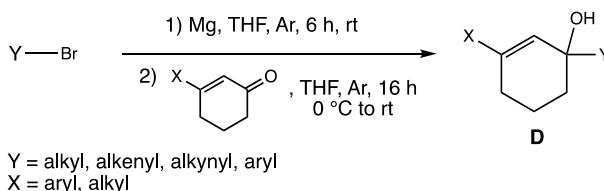

Tertiary allylic alcohols were then synthesized via a Grignard addition to enone **B**. To a dried round-bottom flask with a magnetic stir bar, magnesium turnings (0.19 g, 7.9 mmol), a pinch of iodine, and dried THF (0.5 M) were added. The mix was allowed to stir for 20 min before adding 4-bromobenzotrifluoride (1.11 mL, 7.9 mmol). After visible consumption of the magnesium turnings, an aliquot of the reaction mixture was removed and titrated with a solution of iodine in

dry THF. With the Grignard concentration known, the reaction mixture was cooled in an ice bath. Meanwhile, 3-[4-(trifluoromethyl)phenyl]cyclohex-2-en-1-one (1.39 g, 5.8 mmol, 1 equivalent with respect to amount of Grignard reagent titrated) was dissolved in dried THF to 1 M (5.8 mL). Once the reaction mixture had cooled, the enone solution was added dropwise. After addition, the ice bath was removed and the reaction allowed to warm to room temperature. Reaction progress was monitored via TLC. Upon reaction completion, the reaction was quenched with saturated ammonium chloride solution (50 mL), then extracted with ethyl acetate (3 x 50 mL). The combined organic layers were washed with saturated sodium bicarbonate solution (50 mL), DI water (50 mL), then saturated sodium chloride solution (50 mL). The organic layer was then dried over MgSO<sub>4</sub>, filtered, and concentrated in vacuo. The crude material was purified via flash chromatography using 1% triethylamine buffered hexane : ethyl acetate. The product eluted at 5% EtOAc. The yield was 48% (1.08 g, 2.8 mmol) of 1,3-di[4-(trifluoromethyl)phenyl]cyclohex-2-en-1-ol. Note, base buffering was essential to prevent decomposition of the product on the column.

Table 2. Summary of various tertiary alcohol substrates with yields (by procedures **B1** and **D1**)

| Substrate ID | Identity of X              | Identity of Y—Br                   | Yield (%)<br>[over two steps] |
|--------------|----------------------------|------------------------------------|-------------------------------|
| <b>1a</b>    | (4'-trifluoromethyl)phenyl | 1-bromo-4-(trifluoromethyl)benzene | 48                            |
| <b>1b</b>    | (4'-trifluoromethyl)phenyl | bromobenzene                       | 52                            |
| <b>1c</b>    | phenyl                     | 1-bromo-4-(trifluoromethyl)benzene | 54                            |
| <b>1d</b>    | phenyl                     | bromobenzene                       | 54                            |
| <b>1f</b>    | (4'-trifluoromethyl)phenyl | allyl bromide                      | 39                            |
| <b>1r</b>    | (4'-methoxy)phenyl         | 1-bromo-4-(trifluoromethyl)benzene | 59                            |
| <b>1s</b>    | (4'-trifluoromethyl)phenyl | 1-bromo-4-methoxybenzene           | 32                            |
| <b>11a</b>   | methyl                     | 1-bromo-4-(trifluoromethyl)benzene | 38                            |

### General Procedure D2 for Synthesis of Tertiary Allylic Alcohol **D**

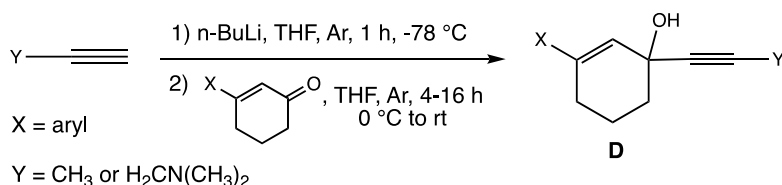

A magnetic stir bar was added to a dried round-bottom flask, followed by propyne (3.8 mL of a 1 M solution in THF, 3.8 mmol) and 7.6 mL dried THF (to 0.5 M). The resulting solution was cooled in a dry ice/acetone bath; then n-butyllithium (1.4 mL of a 2.5 M solution in hexanes, 3.5 mmol) was slowly added drop-wise. The reaction was allowed to stir for 1 h; afterwards, 3-phenylcyclohex-2-en-1-one (0.6 g, 3.5 mmol) was dissolved in 3.5 mL of dry THF (to 1 M), then was slowly added dropwise. Upon completion of addition, the ice bath was removed and the reaction mixture was allowed to warm to room temperature. The reaction progress was monitored by TLC by the consumption of the enone. Once the enone was consumed, the reaction mixture was quenched with saturated ammonium chloride solution (50 mL), then extracted with ethyl acetate (3 x 50 mL). Combined organic layers were washed with saturated sodium bicarbonate solution (50 mL), DI water (50 mL), then saturated sodium chloride solution (50 mL). The separated organic layer was then dried over MgSO<sub>4</sub>, filtered, and concentrated in vacuo. The product mixture was purified via flash chromatography using 1% triethylamine buffered DCM : MeOH. The product eluted at 1% MeOH. The reaction yielded 72% (0.53 g, 2.5 mmol) of 3-(prop-1-yn-1-yl)-3,4,5,6-tetrahydro-[1,1'-biphenyl]-3-ol . Note, base buffering was essential to prevent decomposition on the column.

Table 3. Summary of various tertiary alcohol substrates and their yields (by procedure D2)

| Substrate ID | Identity of X              | Identity of Y                      | Yield (%)<br>[over two steps] |
|--------------|----------------------------|------------------------------------|-------------------------------|
| <b>1g</b>    | (4'-trifluoromethyl)phenyl | CH <sub>2</sub> N(Me) <sub>2</sub> | 76                            |
| <b>1h</b>    | Phenyl                     | Me                                 | 72                            |

### General Procedure D3 for Synthesis of Tertiary Allylic Alcohol **D**

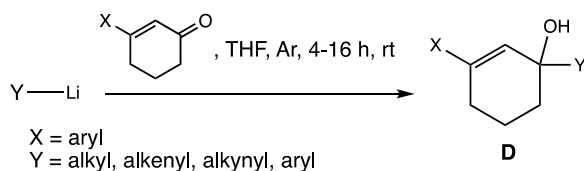

As with synthesis of the enone **B**, prepared organolithium reagents can be used as an alternative method to synthesize **D**. With use of purchased reagents, substrates were synthesized

in one step. A magnetic stir bar was added to a dried round-bottom flask, followed by 3-phenylcyclohex-2-en-1-one (1.0 g, 5.8 mmol) and 11.6 mL dried THF (to 0.5 M). The resulting solution was cooled in an ice bath; then methyl lithium (3.4 mL of a 1.9 M solution in hexane, 6.5 mmol) was added drop-wise. Upon completion of addition, the ice bath was removed, and the reaction mixture was allowed to warm to room temperature. The reaction was monitored by TLC for consumption of the enone. The substrate was isolated as above in procedure **D2**. The reaction yielded 47% (0.51 g, 2.7 mmol) of 1-methyl-3-phenylcyclohex-2-en-1-ol.

Table 4. Summary of various tertiary alcohol substrates and their yields (by procedure **D3**)

| Substrate ID | Identity of X              | Identity of Y                       | Yield (%) |
|--------------|----------------------------|-------------------------------------|-----------|
| <b>1e</b>    | phenyl                     | Me                                  | 47        |
| <b>1i</b>    | (4'-trifluoromethyl)phenyl | acetylide (ethylenediamine complex) | 55        |
| <b>1p</b>    | butyl                      | n-butyl                             | 49        |
| <b>11b</b>   | (4'-trifluoromethyl)phenyl | Me                                  | 38        |

**Procedure P1 for Synthesis of Substrate 1o: 3-hydroxycyclohex-1-ene-1-carbonitrile**

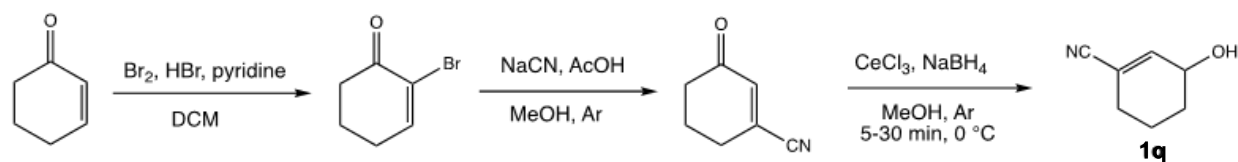

The synthesis of 3-oxocyclohex-1-ene-1-carbonitrile (**1q**) was utilized unmodified from a previously reported method.<sup>2</sup> The third step of the synthesis is Luche reduction of 3-oxocyclohex-1-ene-1-carbonitrile. This step is not part of the previously cited protocol, this was performed as in procedure C1. The yield of **1q** from this step was 46% (2.1 g, 17.4 mmol) of 3-hydroxycyclohex-1-ene-1-carbonitrile.

Note: hydrogen cyanide is generated during this procedure – it is critical that this reaction is performed in a fully functioning fume hood and that the reaction mixtures be neutralized before removal.

### Procedure P2 for Synthesis of Substrate 3: 3-phenylcyclohept-2-en-1-ol

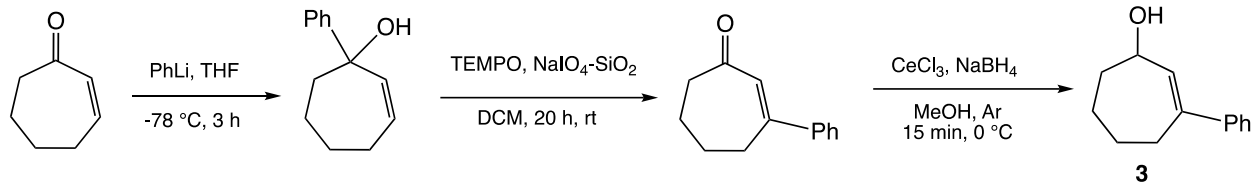

The synthesis of 3-phenylcyclohept-2-en-1-ol consists of three steps. The first two steps are to prepare 3-phenylcyclohept-2-en-1-one.<sup>3</sup> To a dried round-bottom flask, equipped with a magnetic stir bar, cycloheptenone (1.0 g, 9.1 mmol) was added to 30 mL of dry THF (0.3 M). The flask was placed in a dry ice/acetone bath. Phenyllithium (7.6 mL of a 1.8 M solution in butyl ether) was then added drop-wise, and allowed to stir for 3 h. The reaction was quenched with saturated ammonium chloride solution (30 mL) and extracted with ethyl acetate (3 x 10 mL). The separated organic layer was dried over MgSO<sub>4</sub>, filtered, and concentrated. The crude product was purified by column chromatography (hexane : ethyl acetate) which eluted at 5% EtOAc to afford the desired product in 60% yield (1.0 g, 5.5 mmol).

The resulting tertiary allylic alcohol (0.75 g, 4 mmol) was dissolved in 30.8 mL of DCM (0.13 M) and added to a round-bottom flask with magnetic stir bar. TEMPO (1 mol%) was then added, followed by NaIO<sub>4</sub>-SiO<sub>2</sub> (7.0 g). The silica supported periodate was made according to a reported procedure without modification.<sup>6</sup> The reaction mixture was stirred at room temperature for 20 h. The reaction mixture was then filtered, and the solid was washed with DCM. The resulting filtrate was concentrated and purified via column chromatography (hexane : ethyl acetate) with the product eluting at 4% EtOAc to afford a 41% yield (0.31 g, 1.6 mmol) of 3-phenylcyclohept-2-en-1-one.

The third step consists of a Luche reduction, performed as previously stated in procedure C1. The reaction was performed using 1.1 mmol of 3-phenylcyclohept-2-en-1-one (0.21 g), which gave a yield of 89% (0.19 g, 1.0 mmol) of 3-phenylcyclohept-2-en-1-ol.

### Procedure P3 for Synthesis of Substrate 7: 1',2',5',6'-tetrahydro-[1,1':3',1''-terphenyl]-5'-ol

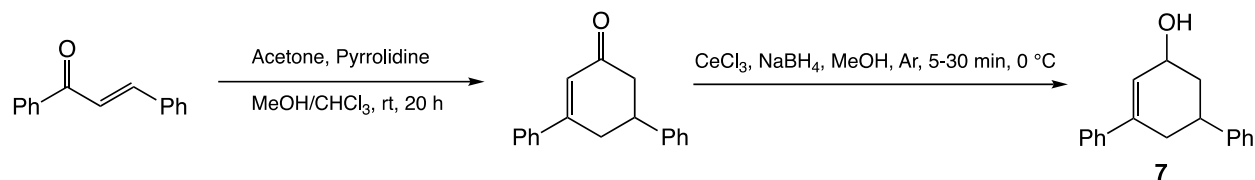

The two-step process to synthesize substrate 7 was followed as previously reported.<sup>4</sup> A 1:1 mixture of methanol and chloroform (50 mL) was added to a round-bottom flask, followed by a magnetic stir bar. Chalcone (4.2 g, 20 mmol) was added and stirred at room temperature until dissolved. Acetone (18 mL) and pyrrolidine (0.33 mL, 4 mmol) were then added. The reaction mixture was stirred at room temperature for 20 h. The solvent was removed from the reaction mixture, and the crude cyclohexenone was purified by column chromatography (hexane : ethyl acetate, product eluted at 5% ethyl acetate) to yield 44% (2.2 g, 8.9 mmol) of 3,5-diphenylcyclohex-2-en-1-one.

The second step is a Luche reduction, performed as previously stated in procedure C1. The reaction was performed using 1.0 g of 3,5-diphenylcyclohex-2-en-1-one (4.0 mmol). The yield from this step was 77% (0.78 g, 3.1 mmol) of 3,5-diphenylcyclohex-2-en-1-ol (7).

### Procedure P4 for Synthesis of Substrate 9: 5'-phenyl-4-(trifluoromethyl)-3',4'-dihydro-[1,1':3',1''-terphenyl]-1'(2'H)-ol

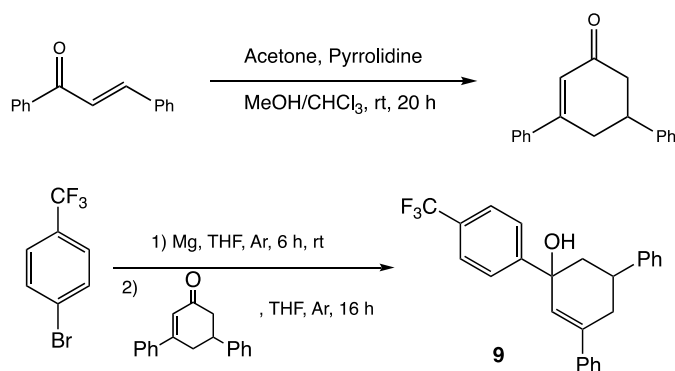

The three-step synthesis for Substrate 9 begins as above, in procedure P3, with the synthesis of 3,5-diphenylcyclohex-2-ene-1-one. A Grignard reagent is prepared and the enone is added, following procedure D1. The reaction was performed using 1.0 g of 3,5-diphenylcyclohex-

2-en-1-one (4.0 mmol). The final step yielded 38% (0.59 g, 1.5 mmol) of 3,5-diphenyl-1-[4-(trifluoromethyl)phenyl]cyclohex-2-en-1-ol (**9**).

### Procedure P5 for Synthesis of Substrate **13**: (3R, 10aR)-1,2,3,9,10,10a-hexahydrophenanthren-3-ol

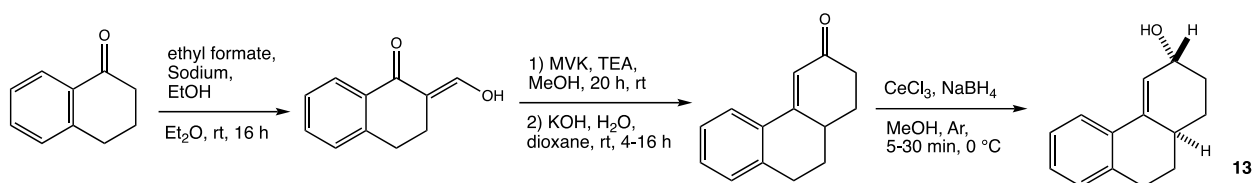

The preparation of **13** is a three-step process which begins with the synthesis of 1,9,10,10a-tetrahydrophenanthren-3(2H)-one, this synthesis is modified from a reported method.<sup>5</sup> The formation of the enone begins with alpha-formylation of alpha-tetralone. Anhydrous diethyl ether (12.6 mL, to 1 M) was added to a round-bottom flask with a magnetic stir bar, followed by addition of tetralone (2.9 mL, 12.6 mmol) under an atmosphere of argon gas. The mixture was then cooled in an ice bath. Six thin pieces of sodium metal at approximately 0.5 cm<sup>2</sup> (approximately 0.5 g) were added to the flask. Ethyl formate (1.5 mL, 19 mmol) and dry ethanol (0.15 mL) were also added, then stirred for 30 min before removing the ice bath. The reaction was allowed to stir for 16 h at room temperature. The flask was then cooled in an ice bath. The reaction was quenched by slow addition of cold water and then stirred for an additional 30 min at 0 °C. The aqueous phase was removed and acidified with concentrated hydrochloric acid solution. The resulting acidic aqueous solution was extracted with ether, then ether layer was washed with saturated sodium bicarbonate solution, dried with MgSO<sub>4</sub>, filtered, and concentrated in vacuo. The crude compound was then purified via flash chromatography (hexane) to achieve a yield of 88% (1.93 g, 11.1 mmol) of 2-(hydroxymethylene)-3,4-dihydronaphthalen-1(2H)-one.

The target enol (**13**) was then formed by Robinson annulation of the previously formed vinyl alcohol and methyl vinyl ketone. 2-(hydroxymethylene)-3,4-dihydronaphthalen-1(2H)-one (1.7 g, 10 mmol) was added to a round-bottom flask, along with a magnetic stir bar and 40 mL of dried methanol (0.25 M). The solution was then cooled in an ice bath before slowly adding triethylamine (2.8 mL, 20 mmol) drop-wise, and subsequently adding methyl vinyl ketone (1.0 mL, 12 mmol). The ice bath was then removed and the reaction mixture was allowed to warm to

room temperature and stirred for 20 h. After 20 h, the reaction mixture was then neutralized with glacial acetic acid. The methanol was removed in vacuo, then replaced with dioxane (0.1 M). A solution of 8.7% (mass/vol) KOH in water was prepared by dissolving 1.80 g of KOH into 20.7 mL of water; this solution was then added to the flask. The reaction mixture was stirred vigorously for 3.5 h at room temperature. The reaction mixture was then washed with water, followed by saturated sodium chloride solution. The aqueous layer was then extracted with DCM. The combined organic layers were dried over MgSO<sub>4</sub>, filtered, concentrated, and purified by column chromatography (hexane : DCM to 30% DCM, then hexane : ethyl acetate with a slow increase of EtOAc to 3% and holding until product is eluted). A yield of 79% (1.6 mg, 7.9 mmol) of 1,9,10,10a-tetrahydrophenanthren-3(2*H*)-one was obtained.

The isolated enone was then reduced as in procedure **C1**. Substrate **13** was subsequently isolated via flash chromatography using 1% triethylamine buffered hexane : ethyl acetate. The product eluted at 13.5% EtOAc with a yield of 67% (0.20 g, 1.0 mmol) of (3*R*,10*aR*)-1,2,3,9,10,10a-hexahydrophenanthren-3-ol. The diastereomer was confirmed via 2D NOE experiments.



### III. List of Substrates

#### 1a 4,4''-bis(trifluoromethyl)-5',6'-dihydro-[1,1':3',1''-terphenyl]-1'(4'H)-ol

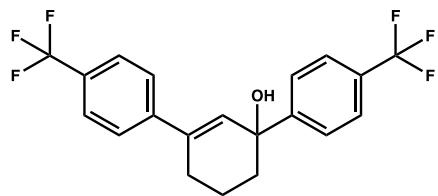

General procedures **B1** and **C1** were followed using 1-bromo-4-(trifluoromethyl)benzene. The substrate was isolated as a white solid with a yield of 60% (2.905 g, 7.5 mmol).  $^1\text{H}$  NMR (400 MHz,  $\text{CDCl}_3$ )  $\delta$  7.65 – 7.53 (m, 8H), 6.17 (s, 1H), 2.66 – 2.47 (m, 2H), 2.13 – 1.80 (m, 4H).  $^{19}\text{F}$  NMR (376 MHz,  $\text{CDCl}_3$ )  $\delta$  -62.4, -62.5.  $^{13}\text{C}$  NMR (101 MHz, Methylene Chloride- $d_2$ )  $\delta$  152.6 (q,  $J = 1.4$  Hz), 145.4 (q,  $J = 1.4$  Hz), 140.6, 130.6, 130.0 (q,  $J = 32.4$  Hz), 129.5 (q,  $J = 32.1$  Hz), 126.6, 126.5, 125.9 (q,  $J = 3.8$  Hz), 125.6 (q,  $J = 3.9$  Hz), 125.0 (q,  $J = 271.8$  Hz), 124.9 (q,  $J = 271.8$  Hz), 73.1, 39.7, 28.0, 20.0. GC/MS (m/z, relative intensity)  $\text{M}^+$  (386.2, 95) and  $\text{M}^+$  minus  $\text{H}_2\text{O}$  (368.2, 100). Melting point 141-143  $^\circ\text{C}$ .

#### 1b 4''-(trifluoromethyl)-5',6'-dihydro-[1,1':3',1''-terphenyl]-1'(4'H)-ol

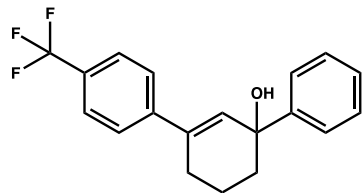

General procedure **B1** was followed using 1-bromo-4-(trifluoromethyl)benzene. Subsequently, general procedure **D1** was followed using bromobenzene. The substrate was isolated as a colorless, viscous oil with a yield of 42% (0.53 g, 1.7 mmol).  $^1\text{H}$  NMR (400 MHz,  $\text{CD}_2\text{Cl}_2$ )  $\delta$  7.66 – 7.57 (m, 4H), 7.52 – 7.48 (m, 2H), 7.38 – 7.32 (m, 2H), 7.29 – 7.24 (m, 1H), 6.21 (t,  $J = 1.9$  Hz, 1H), 2.62 – 2.45 (m, 2H), 2.12 (d,  $J = 1.3$  Hz, 1H), 2.06 – 1.72 (m, 4H).  $^{19}\text{F}$  NMR (376 MHz,  $\text{CD}_2\text{Cl}_2$ )  $\delta$  -62.8.  $^{13}\text{C}$  NMR (101 MHz,  $\text{CD}_2\text{Cl}_2$ )  $\delta$  148.5, 145.7, 139.6, 131.6, 129.7 (q,  $J = 32.4$  Hz), 128.7, 127.5, 126.5, 126.0, 125.8 (q,  $J = 3.9$  Hz), 124.9 (q,  $J = 271.6$  Hz), 73.1, 39.7, 28.0, 20.2. GC/MS  $\text{M}^+$  (318.2, 100) and  $\text{M}^+$  - $\text{H}_2\text{O}$  (300.1, 80). HRMS could not be obtained on this compound. Elemental analysis was not performed. The product of this substrate is an isomer ( $\text{M}^+$  of the isomer was detected, see **2b**).

#### 1c 4-(trifluoromethyl)-5',6'-dihydro-[1,1':3',1''-terphenyl]-1'(4'H)-ol

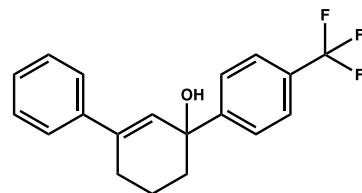

General procedure **B1** was followed using bromobenzene. Subsequently, general procedure **D1** was followed using 1-bromo-4-(trifluoromethyl)benzene. The substrate was isolated as a white solid with a yield of 54% (1.645 g, 5.2 mmol).  $^1\text{H}$  NMR (400 MHz,

CD<sub>2</sub>Cl<sub>2</sub>)  $\delta$  7.73 – 7.56 (m, 4H), 7.48 (d,  $J$  = 7.2 Hz, 2H), 7.33 (m, 3H), 6.10 (s, 1H), 2.56 (m, 2H), 2.19 (s, 1H), 2.08 – 1.77 (m, 4H). <sup>19</sup>F NMR (376 MHz, CD<sub>2</sub>Cl<sub>2</sub>)  $\delta$  -62.6 <sup>13</sup>C NMR (101 MHz, CD<sub>2</sub>Cl<sub>2</sub>)  $\delta$  153.1, 141.7, 129.3 (q,  $J$  = 32.1 Hz), 129.0, 128.6, 128.4, 126.7, 126.1, 125.5 (q,  $J$  = 3.7 Hz), 125.0 (q,  $J$  = 271.9 Hz), 73.1, 39.6, 28.1, 20.1. GC/MS (m/z, relative intensity) M<sup>+</sup> (318.1, 100) and M<sup>+</sup> -H<sub>2</sub>O (300.2, 100). Melting point 145-147 °C.

### 1d 5',6'-dihydro-[1,1':3,1''-terphenyl]-1'(4'H)-ol

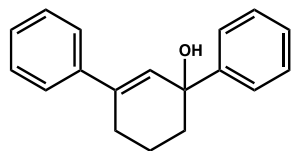

General procedures **B1** and **C1** were followed using bromobenzene. The substrate was isolated as a colorless oil with a yield of 46% (0.40 g, 1.6 mmol). <sup>1</sup>H NMR (400 MHz, CDCl<sub>3</sub>)  $\delta$  7.59 – 7.48 (m, 4H), 7.43 – 7.34 (m, 4H), 7.35 – 7.26 (m, 2H), 6.19 (s, 1H), 2.67 – 2.48 (m, 2H), 2.14 – 1.91 (m, 4H), 1.91 – 1.78 (m, 1H). <sup>13</sup>C NMR (101 MHz, CDCl<sub>3</sub>)  $\delta$  148.2, 141.4, 140.4, 129.0, 128.5, 128.3, 127.8, 127.1, 125.7, 73.0, 39.4, 27.7, 19.9. Note: vinyl carbon signal is not apparent. GC/MS (m/z, relative intensity) M<sup>+</sup> (318.1, 100) and M<sup>+</sup> -H<sub>2</sub>O (300.2, 100). HRMS could not be obtained on this compound. Elemental analysis was not performed. The product of this substrate is an isomer (M<sup>+</sup> of the isomer was detected, see **2d**).

### 1e 3-methyl-3,4,5,6-tetrahydro-[1,1'-biphenyl]-3-ol

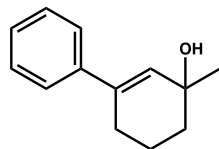

General procedure **B1** was followed using bromobenzene, subsequently procedure **D3** was followed with methyllithium. The substrate was isolated as a white solid with a yield of 47% (0.26 g, 1.4 mmol). <sup>1</sup>H NMR (400 MHz, CD<sub>2</sub>Cl<sub>2</sub>)  $\delta$  7.45 – 7.37 (m, 2H), 7.37 – 7.28 (m, 2H), 7.28 – 7.22 (m, 1H), 5.97 (t,  $J$  = 1.7 Hz, 1H), 2.53 – 2.27 (m, 2H), 1.94 – 1.58 (m, 5H), 1.35 (s, 3H). <sup>13</sup>C NMR (101 MHz, CD<sub>2</sub>Cl<sub>2</sub>)  $\delta$  142.2, 134.0, 131.2, 128.8, 127.8, 125.9, 68.9, 38.1, 30.0, 28.1, 20.6. GC/MS M<sup>+</sup> -H<sub>2</sub>O (170.2, 100). HRMS could not be obtained on this compound. Elemental analysis was not performed, since **1e** is isomeric with the ring-opened product and the M<sup>+</sup> of the ring-opened isomer was detected (see **2e**). Melting point 41-44 °C.

### 1f 3-allyl-4'-(trifluoromethyl)-3,4,5,6-tetrahydro-[1,1'-biphenyl]-3-ol

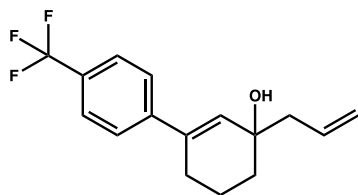

General procedure **B1** was followed using 1-bromo-4-(trifluoromethyl)benzene. Subsequently, procedure **D1** was followed using allyl bromide. The product was isolated as a colorless oil with a yield of 47% (0.28 g, 1.0 mmol).  $^1\text{H}$  NMR (400 MHz,  $\text{CDCl}_3$ )  $\delta$  7.57 (d,  $J = 8.3$  Hz, 2H), 7.48 (d,  $J = 8.2$  Hz, 2H), 6.04 (s, 1H), 5.92 (ddt,  $J = 16.8, 10.4, 7.3$  Hz, 1H), 5.23 – 5.12 (m, 2H), 2.51 – 2.30 (m, 4H), 1.97 – 1.67 (m, 5H).  $^{19}\text{F}$  NMR (376 MHz,  $\text{CDCl}_3$ )  $\delta$  -62.5.  $^{13}\text{C}$  NMR (101 MHz,  $\text{CDCl}_3$ )  $\delta$  145.1 (q,  $J = 1.4$  Hz), 138.8, 133.3, 130.9, 129.4 (q,  $J = 32.4$  Hz), 125.8, 125.3 (q,  $J = 3.8$  Hz), 124.2 (q,  $J = 271.9$  Hz), 119.1, 69.8, 46.9, 35.1, 27.7, 19.4. GC/MS  $\text{M}^+ - \text{H}_2\text{O}$  (264.2, 100). HRMS could not be obtained on this compound. Elemental analysis was not performed. The product of this substrate is an isomer ( $\text{M}^+$  of the isomer was detected, see **2f**).

### 1g 3-(3-(dimethylamino)prop-1-yn-1-yl)-4'-(trifluoromethyl)-3,4,5,6-tetrahydro-[1,1'-biphenyl]-3-ol

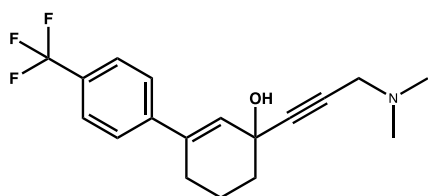

General procedure **B1** was followed using 1-bromo-4-(trifluoromethyl)benzene. Subsequently, procedure **D2** was followed using *N,N*-dimethylprop-2-yn-1-amine. The product was isolated as an off-white solid with a yield of 61% (0.41 g, 1.3 mmol).  $^1\text{H}$  NMR (400 MHz,  $\text{CD}_2\text{Cl}_2$ )  $\delta$  7.62 – 7.49 (m, 4H), 6.16 (t,  $J = 1.8$  Hz, 1H), 3.56 (b, 1H), 3.25 (s, 2H), 2.50 – 2.33 (m, 2H), 2.25 (s, 6H), 2.16 – 1.84 (m, 4H).  $^{19}\text{F}$  NMR (376 MHz,  $\text{CD}_2\text{Cl}_2$ )  $\delta$  -62.8.  $^{13}\text{C}$  NMR (101 MHz,  $\text{CD}_2\text{Cl}_2$ )  $\delta$  144.8 (d,  $J = 1.4$  Hz), 137.3, 129.7, 129.0 (q,  $J = 32.3$  Hz), 125.8, 125.2 (q,  $J = 3.8$  Hz), 124.3 (q,  $J = 271.7$  Hz), 88.8, 79.1, 65.4, 47.9, 43.9, 37.8, 27.1, 19.7. GC/MS ( $m/z$ , relative intensity) reported  $\text{M}^+$  (323.2, 60). Melting point 128-130 °C.

### 1h 3-(prop-1-yn-1-yl)-3,4,5,6-tetrahydro-[1,1'-biphenyl]-3-ol

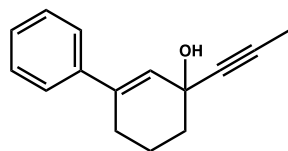

General procedure **B1** was followed using bromobenzene. Subsequently, procedure **D2** was followed using propyne. The product was isolated as a white solid with a yield of 72% (0.42 g, 2.0 mmol).  $^1\text{H}$  NMR (400 MHz,  $\text{CD}_2\text{Cl}_2$ )  $\delta$  7.44 – 7.39 (m, 2H), 7.37 – 7.30 (m, 2H), 7.30 – 7.24 (m, 1H), 6.04 (t,  $J = 1.6$  Hz, 1H), 2.51 – 2.33 (m, 2H), 2.09 (s, 1H), 2.06 – 1.87 (m, 4H), 1.85 (s, 3H).  $^{13}\text{C}$  NMR (101 MHz,  $\text{CD}_2\text{Cl}_2$ )

$\delta$  141.6, 139.2, 128.9, 128.2, 128.1, 126.0, 83.6, 80.4, 66.4, 38.4, 27.8, 20.3, 3.9. GC/MS  $M^+ - H_2O$  (194.2, 100). HRMS could not be obtained on this compound. Elemental analysis was not performed. The product of this substrate is an isomer ( $M^+$  of the isomer was detected, see **2h**). Melting point 117-120 °C.

### 1i 3-ethynyl-4'-(trifluoromethyl)-3,4,5,6-tetrahydro-[1,1'-biphenyl]-3-ol

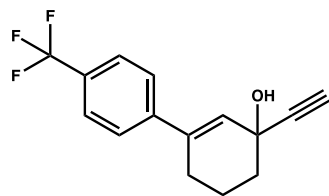

General procedure **B1** was followed using 1-bromo-4-(trifluoromethyl)benzene. Subsequently, procedure **D3** was followed using lithium acetylide (ethylenediamine complex). The product was isolated as a white solid with a yield of 38% (0.44 g, 1.7 mmol).  $^1H$  NMR (400 MHz,  $CD_2Cl_2$ )  $\delta$  7.63 – 7.52 (m, 4H), 6.14 (t,  $J = 1.9$  Hz, 1H), 2.61 (s, 1H), 2.54 – 2.36 (m, 2H), 2.23 (s, 1H), 2.16 – 2.04 (m, 1H), 2.02 – 1.89 (m, 3H).  $^{19}F$  NMR (376 MHz,  $CD_2Cl_2$ )  $\delta$  -62.8.  $^{13}C$  NMR (101 MHz,  $CD_2Cl_2$ )  $\delta$  145.1, 139.2, 129.9 (q,  $J = 32.4$  Hz), 129.1, 126.5, 125.8 (q,  $J = 3.8$  Hz), 124.9 (q,  $J = 271.7$  Hz), 87.8, 72.4, 66.2, 37.9, 27.7, 20.0. GC/MS (m/z, relative intensity)  $M^+$  (266.1, 15). Melting point 88-90 °C.

### 1j 4'-methyl-3,4,5,6-tetrahydro-[1,1'-biphenyl]-3-ol

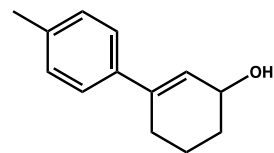

General procedure **B1** was followed using 1-bromo-4-methylbenzene. The resulting enone was reduced as in procedure **C1**. The product was isolated as a white solid with a yield of 84% (0.86 g, 4.6 mmol).  $^1H$  NMR (400 MHz,  $CDCl_3$ )  $\delta$  7.34 – 7.30 (m, 2H), 7.14 (d,  $J = 8.0$  Hz, 2H), 6.11 (dt,  $J = 3.6, 1.8$  Hz, 1H), 4.43 – 4.34 (m, 1H), 2.54 – 2.28 (m, 5H), 2.01 – 1.85 (m, 3H), 1.81 – 1.61 (m, 2H).  $^{13}C$  NMR (101 MHz,  $CDCl_3$ )  $\delta$  139.9, 138.5, 137.2, 129.0, 125.8, 125.3, 66.4, 31.7, 27.5, 21.1, 19.5. GC/MS  $M^+ - H_2O$  (170.1, 100). HRMS could not be obtained on this compound. Elemental analysis was not performed. This substrate is isomeric with the ring-opened product and the  $M^+$  of the ring-opened isomer was detected (see **2j**). Melting point 71-73 °C.

### 1k 4'-(trifluoromethyl)-3,4,5,6-tetrahydro-[1,1'-biphenyl]-3-ol

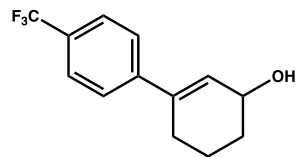

General procedure **B1** was followed using 1-bromo-4-(trifluoromethyl)benzene. The resulting enone was reduced as in procedure **C1**. The product was isolated as a white solid with a yield of 63% (1.1 g, 4.5 mmol).  $^1\text{H}$  NMR (400 MHz, Acetonitrile- $d_3$ )  $\delta$  7.64 (d,  $J = 8.6$  Hz, 2H), 7.60 (d,  $J = 8.6$  Hz, 2H), 6.20 (dt,  $J = 3.5, 1.8$  Hz, 1H), 4.28 (s, 1H), 2.93 (d,  $J = 5.5$  Hz, 1H), 2.53 – 2.28 (m, 2H), 1.93 – 1.85 (m, 2H), 1.75 – 1.63 (m, 1H), 1.61 – 1.48 (m, 1H).  $^{19}\text{F}$  NMR (376 MHz,  $\text{CD}_3\text{CN}$ )  $\delta$  -62.9.  $^{13}\text{C}$  NMR (101 MHz, Acetonitrile- $d_3$ )  $\delta$  146.6, 138.4, 131.1, 129.3 (q,  $J = 32.2$  Hz), 126.8, 126.2 (q,  $J = 3.9$  Hz), 125.6 (q,  $J = 271.0$  Hz), 66.5, 32.3, 27.9, 20.5. GC/MS (m/z, relative intensity)  $\text{M}^+$  (242.1, 40). Melting point 65-66 °C.

### 1l 3,4,5,6-tetrahydro-[1,1'-biphenyl]-3-ol

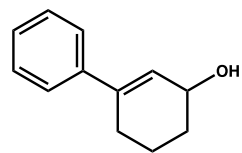

General procedure **B1** was followed using bromobenzene. The resulting enone was reduced as in procedure **C1**. The product was isolated as a white solid with a yield of 52% (0.52 g, 3.0 mmol).  $^1\text{H}$  NMR (400 MHz,  $\text{CD}_2\text{Cl}_2$ )  $\delta$  7.46 – 7.41 (m, 2H), 7.37 – 7.31 (m, 2H), 7.30 – 7.24 (m, 1H), 6.13 (dt,  $J = 3.5, 1.8$  Hz, 1H), 4.36 (s, 1H), 2.53 – 2.30 (m, 2H), 2.04 (d,  $J = 3.9$  Hz, 1H), 1.99 – 1.86 (m, 2H), 1.80 – 1.58 (m, 2H).  $^{13}\text{C}$  NMR (101 MHz,  $\text{CD}_2\text{Cl}_2$ )  $\delta$  142.1, 140.2, 128.8, 127.8, 127.5, 125.9, 66.8, 32.3, 28.0, 20.1. GC/MS  $\text{M}^+$  (174.1, 75). Melting point 63-65 °C.

### 1m 4'-methoxy-3,4,5,6-tetrahydro-[1,1'-biphenyl]-3-ol

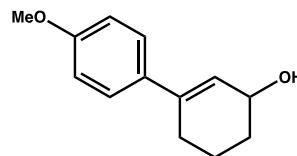

General procedure **B1** was followed using 1-bromo-4-methoxybenzene. The resulting enone was reduced as in procedure **C1**. The product was isolated as a white solid with a yield of 80% (0.80 g, 3.9 mmol).  $^1\text{H}$  NMR (400 MHz,  $\text{CD}_2\text{Cl}_2$ )  $\delta$  7.39 – 7.33 (m, 2H), 6.89 – 6.82 (m, 2H), 6.04 (dt,  $J = 3.6, 1.7$  Hz, 1H), 4.37 – 4.29 (m, 1H), 3.79 (s, 3H), 2.49 – 2.27 (m, 2H), 1.97 – 1.82 (m, 2H), 1.78 – 1.57 (m, 2H), 1.54 (d,  $J = 3.0$  Hz, 1H).  $^{13}\text{C}$  NMR (101 MHz,  $\text{CD}_2\text{Cl}_2$ )  $\delta$  159.7, 139.6, 134.4, 126.9, 125.8, 114.1, 66.8, 55.8, 32.4, 28.0, 20.1. GC/MS  $\text{M}^+ - \text{H}_2\text{O}$  (186.2, 100). HRMS could not be obtained on this compound. Elemental analysis was not performed. The product of this substrate is an isomer (HRMS of the isomer was obtained, see **2m**). Melting point 74-78 °C.

### 1p 1,3-dibutylcyclohex-2-en-1-ol

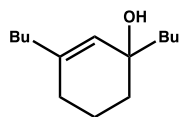

Procedure **D3** was followed using intermediate **A** as the enone and n-butyllithium as the organolithium reagent. Subsequently, procedure **D3** was followed using n-butyllithium. The substrate was isolated as a yellow oil with a yield of 49% (1.2 g, 5.7 mmol).  $^1\text{H}$  NMR (400 MHz,  $\text{CDCl}_3$ )  $\delta$  5.31 (s, 1H), 2.01 – 1.77 (m, 4H), 1.74 – 1.58 (m, 3H), 1.57 – 1.19 (m, 12H), 0.92 – 0.83 (m, 6H).  $^{13}\text{C}$  NMR (101 MHz,  $\text{CDCl}_3$ )  $\delta$  141.7, 127.0, 70.4, 42.6, 37.5, 35.4, 29.8, 28.8, 26.0, 23.4, 22.5, 19.6, 14.2, 14.1 GC/MS  $\text{M}^+ - \text{H}_2\text{O}$  (192.2, 40). HRMS could not be obtained on this compound. Elemental analysis was not performed.

### 1q 3-hydroxycyclohex-1-ene-1-carbonitrile

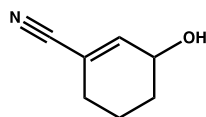

Procedure **P1** was followed to synthesize the substrate as a clear oil with a yield of 29% (1.0 g, 8.3 mmol).  $^1\text{H}$  NMR (400 MHz,  $\text{CD}_3\text{CN}$ )  $\delta$  6.57 – 6.50 (m, 1H), 4.22 – 4.12 (m, 1H), 3.24 (d,  $J = 5.3$  Hz, 1H), 2.28 – 2.07 (m, 2H), 1.92 – 1.71 (m, 2H), 1.66 – 1.54 (m, 1H), 1.53 – 1.43 (m, 1H).  $^{13}\text{C}$  NMR (101 MHz,  $\text{CD}_3\text{CN}$ )  $\delta$  147.8, 120.0, 114.6, 65.2, 31.0, 27.3, 19.5. GC/MS ( $m/z$ , relative intensity)  $\text{M}^+$  (123.1, 100).

### 1r 4''-methoxy-4-(trifluoromethyl)-5',6'-dihydro-[1,1':3',1''-terphenyl]-1'(4'H)-ol

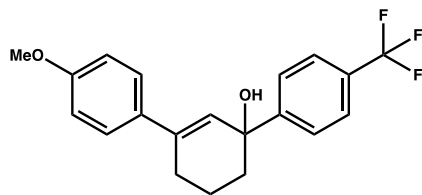

General procedure **B1** was followed using 1-bromo-4-methoxybenzene. Subsequently, general procedure **D1** was followed using 1-bromo-4-(trifluoromethyl)benzene. The substrate was isolated as a white solid with a yield of 59% (2.0 g, 5.7 mmol).  $^1\text{H}$  NMR (400 MHz,  $\text{CDCl}_3$ )  $\delta$  7.64 (d,  $J = 8.4$  Hz, 1H), 7.59 (d,  $J = 8.5$  Hz, 1H), 7.44 – 7.39 (m, 2H), 6.92 – 6.86 (m, 2H), 6.04 (s, 1H), 3.83 (s, 3H), 2.65 – 2.41 (m, 2H), 2.09 – 1.78 (m, 5H).  $^{19}\text{F}$  NMR (376 MHz,  $\text{CDCl}_3$ )  $\delta$  -62.4.  $^{13}\text{C}$  NMR (101 MHz,  $\text{CDCl}_3$ )  $\delta$  159.6, 152.3, 140.6, 133.4, 129.2 (q,  $J = 32.2$  Hz), 126.7, 126.5, 126.1, 125.8 (q,  $J = 3.8$  Hz), 124.4 (q,  $J = 271.9$  Hz), 113.9, 72.9, 55.4, 39.4, 27.6, 19.7. GC/MS  $\text{M}^+ - \text{H}_2\text{O}$  (330.2, 100). HRMS could not be obtained on this compound. Elemental analysis was not performed. Melting point 107-110 °C.

### 1s 4-methoxy-4''-(trifluoromethyl)-5',6'-dihydro-[1,1':3',1''-terphenyl]-1'(4'H)-ol

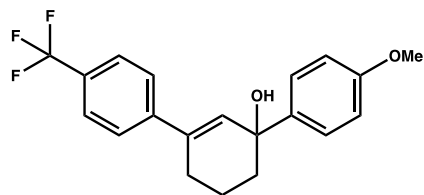

General procedure **B1** was followed using 1-bromo-4-(trifluoromethyl)benzene. Subsequently, general procedure **D1** was followed using 1-bromo-4-methoxybenzene. The substrate was isolated as a colorless oil with a yield of 54% (1.6 g, 5.0 mmol).  $^1\text{H}$  NMR (400 MHz,  $\text{CD}_3\text{CN}$ )  $\delta$  7.66 (m, 4H), 7.42 – 7.37 (m, 2H), 6.92 – 6.85 (m, 2H), 6.17 (t,  $J$  = 1.8 Hz, 1H), 3.77 (s, 3H), 3.33 (s, 1H), 2.59 – 2.40 (m, 2H), 2.00 – 1.79 (m, 3H), 1.77 – 1.64 (m, 1H).  $^{19}\text{F}$  NMR (376 MHz,  $\text{CD}_3\text{CN}$ )  $\delta$  -62.9.  $^{13}\text{C}$  NMR (101 MHz,  $\text{CD}_3\text{CN}$ )  $\delta$  159.5, 146.7, 141.6, 138.7, 132.8, 129.5 (q,  $J$  = 32.1 Hz), 127.8, 127.1, 126.2 (q,  $J$  = 3.9 Hz), 125.6 (q,  $J$  = 271.1 Hz), 114.2, 72.7, 55.8, 40.0, 28.0, 20.3. GC/MS  $\text{M}^+$  (318.1, 100), and  $\text{M}^+$  - $\text{H}_2\text{O}$  (300.2, 100).

### 1n 3-(furan-2-yl)cyclohex-2-en-1-ol

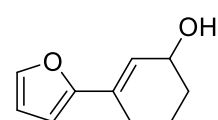

3-(furan-2-yl)cyclohex-2-en-1-one (390 mg, 2.4 mmol) from general procedure **B1** with 2-bromofuran, was set stirring at room temperature in ethanol solution with 1.5 equivalents of  $\text{NaBH}_4$  (137 mg, 3.6 mmol). When deemed complete by  $^1\text{H}$ NMR, the reaction mixture was quenched with saturated  $\text{NH}_4\text{Cl}$  solution, concentrated in vacuo, and extracted into EtOAc. The organic layer was washed with brine (50 mL) and subsequently dried over  $\text{MgSO}_4$  before being concentrated down to afford the desired product as a viscous yellow oil (355 mg, 90% yield).  $^1\text{H}$  NMR (599 MHz, Acetonitrile- $d_3$ )  $\delta$  7.43 (d,  $J$  = 1.8 Hz, 1H), 6.42 (dd,  $J$  = 3.4, 1.8 Hz, 1H), 6.34 (d,  $J$  = 3.3 Hz, 1H), 6.19 – 6.16 (m, 1H), 4.25 (s, 1H), 2.83 (s, 1H), 2.34 – 2.28 (m, 1H), 2.27 – 2.21 (m, 1H), 1.90 – 1.80 (m, 2H), 1.70 – 1.60 (m, 1H), 1.57 – 1.49 (m, 1H).  $^{13}\text{C}$  NMR (151 MHz, Acetonitrile- $d_3$ )  $\delta$  155.4, 142.9, 129.8, 125.7, 112.2, 106.7, 65.9, 32.6, 25.6, 19.9. GC/MS ( $m/z$ , relative intensity)  $\text{M}^+$  (164.1, 80).

### 1o 3-(pyridin-2-yl)cyclohex-2-en-1-ol

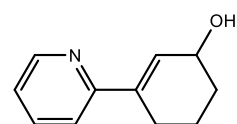

3-(pyridine-2-yl)cyclohex-2-en-1-one (780 mg, 4.5 mmol) from general procedure **B1** with 2-bromopyridine, was stirred at room temperature in ethanol. To the solution was added 1.5 equivalents of  $\text{NaBH}_4$  (255 mg, 6.8 mmol). The reaction was monitored via NP-TLC. The reaction was quenched with water, concentrated in vacuo, dissolved in  $\text{CH}_2\text{Cl}_2$ . The solution was then washed with 1 M NaOH, brine and then subsequently dried over  $\text{MgSO}_4$  before being concentrated down to afford the

crude product as a light-brown solid (1076 mg). An aliquot (250 mg) was drawn from the crude product and was subjected to silica gel column chromatography (DCM/MeOH, buffered with 1% triethylamine). The pyridinyl alcohol was isolated as a light-brown oil (40 mg, 16% yield).  $^1\text{H}$  NMR (800 MHz, chloroform- $d$ )  $\delta$  8.55 (ddd,  $J$  = 4.8 Hz, 1.8 Hz, 0.9 Hz,  $^1\text{H}$ ),  $\delta$  7.63 (td,  $J$  = 8.1 Hz, 1.9 Hz,  $^1\text{H}$ ),  $\delta$  7.41 (d,  $J$  = 8.0 Hz,  $^1\text{H}$ ),  $\delta$  7.14 (ddd, 7.4 Hz, 4.8 Hz, 1.1 Hz,  $^1\text{H}$ ),  $\delta$  6.61 (dt, 3.6 Hz, 1.8 Hz,  $^1\text{H}$ ),  $\delta$  2.57 (m,  $^1\text{H}$ ),  $\delta$  2.55 (m,  $^1\text{H}$ ),  $\delta$  2.48 (m,  $^1\text{H}$ ),  $\delta$  2.46 (m,  $^1\text{H}$ ),  $\delta$  1.97 (m,  $^1\text{H}$ ),  $\delta$  1.92 (m,  $^1\text{H}$ ),  $\delta$  1.73 (m,  $^1\text{H}$ ),  $\delta$  1.67 (m,  $^1\text{H}$ ).  $^{13}\text{C}$  NMR (200 MHz, chloroform- $d$ )  $\delta$  158.1, 148.9, 139.6, 136.3, 129.8, 122.2, 119.7, 66.2, 31.7, 26.0, 19.5. CI-GC/MS ( $m/z$ , relative intensity)  $M+1$  (176).

### 3 3-phenylcyclohept-2-en-1-ol

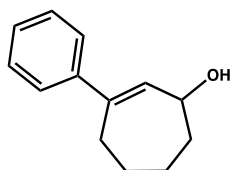

Procedure **P2** was followed to synthesize the substrate as an oil with a yield of 89% (0.14 g, 0.74 mmol).  $^1\text{H}$  NMR (400 MHz,  $\text{CD}_2\text{Cl}_2$ )  $\delta$  7.37 – 7.27 (m, 4H), 7.25 – 7.19 (m, 1H), 5.96 (dd,  $J$  = 3.5, 1.7 Hz, 1H), 4.57 (d,  $J$  = 7.3 Hz, 1H), 2.64 (m, 1H), 2.52 – 2.42 (m, 1H), 2.06 – 1.96 (m, 1H), 1.89 – 1.61 (m, 5H), 1.49 – 1.36 (m, 1H).  $^{13}\text{C}$  NMR (101 MHz,  $\text{CD}_2\text{Cl}_2$ )  $\delta$  144.6, 142.2, 136.7, 128.7, 127.2, 126.2, 72.6, 37.2, 33.2, 28.7, 26.7. GC/MS ( $m/z$ , relative intensity)  $M+$  (188.1, 95) and  $M+ -\text{H}_2\text{O}$  (170.1, 80).

### 5 3-phenylcyclopent-2-en-1-ol

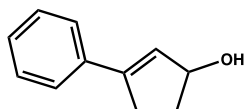

Procedure **A1** was followed using 1,3-cyclopentanedione to form the intermediate for use with procedure **B1**. Procedure **B1** was followed using bromobenzene. The isolated enone was then reduced as in procedure **C1** to produce the substrate as a white solid with a yield of 63% (0.32 g, 2.0 mmol).  $^1\text{H}$  NMR (400 MHz,  $\text{CD}_3\text{CN}$ )  $\delta$  7.55 – 7.48 (m, 2H), 7.38 – 7.32 (m, 2H), 7.31 – 7.25 (m, 1H), 6.22 (q,  $J$  = 2.1 Hz, 1H), 4.87 (q,  $J$  = 5.9, 5.5 Hz, 1H), 2.91 – 2.79 (m, 2H), 2.66 – 2.56 (m, 1H), 2.36 (m, 1H), 1.81 – 1.71 (m, 1H).  $^{13}\text{C}$  NMR (101 MHz,  $\text{CD}_3\text{CN}$ )  $\delta$  145.5, 137.1, 129.5, 129.4, 128.8, 126.9, 77.8, 34.4, 32.0. GC/MS  $M+ -\text{H}_2\text{O}$  (142.2, 100). HRMS could not be obtained on this compound. Elemental analysis was not performed. Melting point 90-93  $^\circ\text{C}$ .



### 7 1',2',5',6'-tetrahydro-[1,1':3',1''-terphenyl]-5'-ol

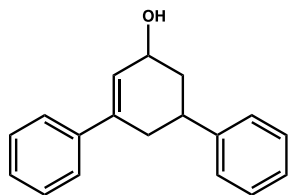

Procedure **P3** was followed to produce the substrate as a clear oil with a yield of 45% (2.2 g, 8.9 mmol).  $^1\text{H}$  NMR (400 MHz,  $\text{CD}_3\text{CN}$ )  $\delta$  7.48 – 7.44 (m, 2H), 7.36 – 7.30 (m, 6H), 7.29 – 7.20 (m, 2H), 6.12 (dt,  $J = 2.5$ , 1.2 Hz, 1H), 4.58 – 4.47 (m, 1H), 3.08 (d,  $J = 5.8$  Hz, 1H), 3.02 (dddd,  $J = 13.4$ , 11.0, 5.2, 2.5 Hz, 1H), 2.68 – 2.57 (m, 1H), 2.53 (dddd,  $J = 17.1$ , 11.1, 3.7, 2.5 Hz, 1H), 2.26 – 2.15 (m, 1H), 1.74 (ddd,  $J = 13.2$ , 11.8, 10.0 Hz, 1H).  $^{13}\text{C}$  NMR (101 MHz,  $\text{CD}_3\text{CN}$ )  $\delta$  147.1, 142.0, 138.3, 129.8, 129.5, 129.4, 128.3, 127.9, 127.3, 126.3, 69.2, 40.4, 39.9, 36.8. GC/MS  $\text{M}^+ - \text{H}_2\text{O}$  (232.0, 100). HRMS could not be obtained on this compound. Elemental analysis was not performed. The product of this substrate is an isomer ( $\text{M}^+$  of the isomer was detected, see **8**). Specific diastereomer not confirmed.

### 9 5'-phenyl-4-(trifluoromethyl)-3',4'-dihydro-[1,1':3',1''-terphenyl]-1'(2'H)-ol

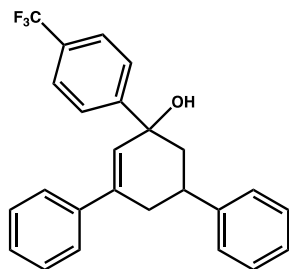

Procedure **P4** was followed to synthesize the substrate as a white solid with a yield of 32% (0.38 g, 1.0 mmol).  $^1\text{H}$  NMR (400 MHz,  $\text{CD}_2\text{Cl}_2$ )  $\delta$  7.80 (d,  $J = 8.2$  Hz, 2H), 7.69 (d,  $J = 8.2$  Hz, 2H), 7.62 – 7.57 (m, 2H), 7.48 – 7.30 (m, 5H), 7.29 – 7.21 (m, 3H), 6.23 (s, 1H), 2.98 – 2.84 (m, 2H), 2.71 (m, 1H), 2.45 – 2.33 (m, 2H), 2.30 (s, 1H).  $^{19}\text{F}$  NMR (376 MHz,  $\text{CD}_2\text{Cl}_2$ )  $\delta$  -62.7.  $^{13}\text{C}$  NMR (101 MHz,  $\text{CD}_2\text{Cl}_2$ )  $\delta$  151.5, 145.4, 141.1, 140.3, 129.8 (q,  $J = 32.2$  Hz), 129.1, 129.1, 128.6, 128.5, 127.6, 127.4, 127.1, 126.1, 125.6 (q,  $J = 3.8$  Hz), 125.0 (q,  $J = 271.9$  Hz), 75.8, 46.3, 38.2, 36.8. One quartet of quaternary carbon signal not fully resolved. GC/MS  $\text{M}^+ - \text{H}_2\text{O}$  (376.3, 80). HRMS could not be obtained on this compound. Elemental analysis was not performed. The product of this substrate is an isomer ( $\text{M}^+$  of the isomer was detected, see **10**). Melting point 123-126 °C. Specific diastereomer not confirmed.

### 11a 5-methyl-4'-(trifluoromethyl)-3,4-dihydro-[1,1'-biphenyl]-1(2H)-ol

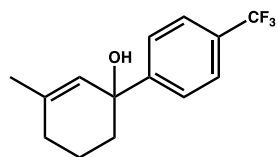

General procedure **D3** was performed with enone **A** using methyllithium; subsequently, general procedure **D1** was followed using 1-bromo-4-(trifluoromethyl)benzene. The substrate was isolated as a colorless oil with a yield of 42% (0.36 g, 1.4 mmol).  $^1\text{H}$  NMR (400 MHz,  $\text{C}_6\text{D}_6$ )  $\delta$  7.46 – 7.38 (m, 4H), 5.19 (p,  $J$  = 1.5 Hz, 1H), 1.78 – 1.70 (m, 1H), 1.64 (t,  $J$  = 6.0 Hz, 2H), 1.61 – 1.41 (m, 5H), 1.39 – 1.27 (m, 2H).  $^{19}\text{F}$  NMR (376 MHz,  $\text{C}_6\text{D}_6$ )  $\delta$  -61.9.  $^{13}\text{C}$  NMR (101 MHz,  $\text{C}_6\text{D}_6$ )  $\delta$  153.3, 138.7, 129.0 (q,  $J$  = 32.1 Hz), 127.0, 126.4, 125.3 (q,  $J$  = 271.7 Hz), 125.1 (q,  $J$  = 3.8 Hz), 72.23, 39.5, 30.0, 23.7, 19.5. GC/MS (m/z, relative intensity)  $\text{M}^+$  (256.1, 30).

### 11b 3-methyl-4'-(trifluoromethyl)-3,4,5,6-tetrahydro-[1,1'-biphenyl]-3-ol

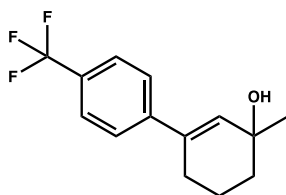

General procedure **B1** was followed using 1-bromo-4-(trifluoromethyl)benzene. Subsequently, procedure **D3** was followed using methyllithium to produce the substrate as a white solid with a yield of 29% (0.30 g, 1.2 mmol).  $^1\text{H}$  NMR (400 MHz,  $\text{CDCl}_3$ )  $\delta$  7.57 (d,  $J$  = 8.3 Hz, 2H), 7.48 (d,  $J$  = 8.2 Hz, 2H), 6.05 (s, 1H), 2.49 – 2.29 (m, 2H), 1.96 – 1.77 (m, 3H), 1.72 (d,  $J$  = 10.7 Hz, 2H), 1.39 (s, 3H).  $^{19}\text{F}$  NMR (376 MHz,  $\text{CDCl}_3$ )  $\delta$  -62.5.  $^{13}\text{C}$  NMR (101 MHz,  $\text{CDCl}_3$ )  $\delta$  145.1 (d,  $J$  = 1.5 Hz), 137.7, 132.5, 129.4 (q,  $J$  = 32.3 Hz), 125.8, 125.4 (q,  $J$  = 3.8 Hz), 124.4 (q,  $J$  = 271.8 Hz), 68.7, 37.5, 29.7, 27.6, 20.0. GC/MS (m/z, relative intensity)  $\text{M}^+$  (256.1, 30). Melting point 54-56 °C.

### 13 (3*R*,10*aR*)-1,2,3,9,10,10*a*-hexahydrophenanthren-3-ol

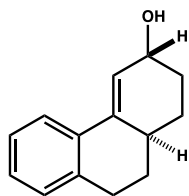

Procedure **P5** was followed to produce the substrate as a colorless oil with a yield of 64% (0.20 g, 1.0 mmol).  $^1\text{H}$  NMR (400 MHz,  $\text{CDCl}_3$ )  $\delta$  7.65 (dd,  $J$  = 7.3, 2.0 Hz, 1H), 7.21 – 7.07 (m, 3H), 6.27 (s, 1H), 4.46 (ddt,  $J$  = 9.4, 6.0, 2.8 Hz, 1H), 2.99 – 2.77 (m, 2H), 2.39 – 2.14 (m, 3H), 2.04 – 1.88 (m, 2H), 1.55 – 1.27 (m, 3H).  $^{13}\text{C}$  NMR (101 MHz,  $\text{CDCl}_3$ )  $\delta$  138.6, 137.1, 133.7, 129.4, 127.5, 126.0, 124.0, 123.5, 68.3, 36.2, 32.1, 31.4, 30.0, 29.2. GC/MS  $\text{M}^+$  (200.1, 70), and  $\text{M}^+ - \text{H}_2\text{O}$  (182.1, 100). HRMS could not be obtained on this compound. Elemental analysis was not performed. The product of this substrate is an isomer ( $\text{M}^+$  of the isomer was detected, see **14**).

#### IV. General Procedure E for Photocatalytic Reactions

Light-promoted reactions were setup in NMR tubes charged with substrate (1 equiv), benzoic acid (1.1 equiv), and catalyst **PC1** (0.25 mol%) dissolved in dichloromethane (1.0 mg/mL, 1.41 mM) or toluene (0.3 mg/mL, 0.42 mM) stock solutions. Deuterated benzene ( $C_6D_6$ ), sealed in a glass capillary tube, was added to aid in the NMR locking process. A rubber septum was used to seal the NMR tube, which was then degassed by sparging with argon for 10 min. The degassed NMR tubes were then placed in the photoreactor, and monitored periodically by proton and (if applicable) fluorine NMR. Upon reaction completion, the mixtures were neutralized with saturated sodium bicarbonate solution. The organic layer was washed with water and saturated sodium chloride solution. It was then dried over  $MgSO_4$ , filtered, and concentrated in vacuo. The crude products were then purified by flash chromatography.

## V. List of Reaction Products

### 2a 1,5-bis(4-(trifluoromethyl)phenyl)hex-5-en-1-one

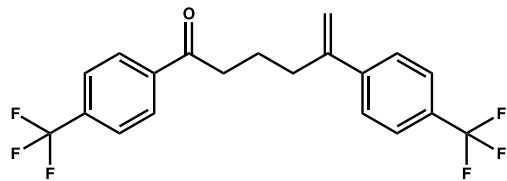

General procedure E was followed using **1a** to give the product as a colorless oil with a yield of 95% (47.5 mg, 0.12 mmol).  $^1\text{H}$  NMR (400 MHz,  $\text{CD}_3\text{CN}$ )  $\delta$  8.05 (d,  $J = 8.1$  Hz, 2H), 7.79 (d,  $J = 8.2$  Hz, 2H), 7.69 – 7.60 (m, 4H), 5.44 (s, 1H), 5.24 (q,  $J = 1.3$  Hz, 1H), 3.06 (t,  $J = 7.1$  Hz, 2H), 2.64 (t,  $J = 7.6$  Hz, 2H), 1.82 (p,  $J = 7.2$  Hz, 2H).  $^{19}\text{F}$  NMR (376 MHz,  $\text{CD}_3\text{CN}$ )  $\delta$  -63.0, -63.6.  $^{13}\text{C}$  NMR (101 MHz,  $\text{CD}_3\text{CN}$ )  $\delta$  200.24, 148.05, 145.78 (d,  $J = 1.5$  Hz), 141.11 (d,  $J = 1.3$  Hz), 134.27 (q,  $J = 32.4$  Hz), 129.70 (q,  $J = 32.2$  Hz), 129.48, 127.78, 126.58 (q,  $J = 3.8$  Hz), 126.25 (q,  $J = 3.9$  Hz), 125.00 (q,  $J = 271.0$  Hz), 124.98 (q,  $J = 271.8$  Hz), 115.65, 38.70, 34.84, 23.31. GC/MS ( $m/z$ , relative intensity)  $\text{M}^+$  (385.9, 5).

### 2b 1-phenyl-5-(4-(trifluoromethyl)phenyl)hex-5-en-1-one

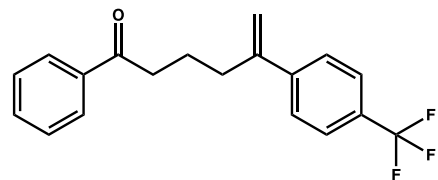

General procedure E was followed using **1b** to give the product as a colorless oil with a yield of 91% (45.5 mg, 0.14 mmol).  $^1\text{H}$  NMR (400 MHz,  $\text{CD}_3\text{CN}$ )  $\delta$  7.95 – 7.89 (m, 2H), 7.70 – 7.60 (m, 4H), 7.62 – 7.56 (m, 1H), 7.52 – 7.43 (m, 2H), 5.43 (s, 1H), 5.24 (d,  $J = 1.2$  Hz, 1H), 3.02 (t,  $J = 7.1$  Hz, 2H), 2.64 (t,  $J = 7.6$  Hz, 2H), 1.80 (p,  $J = 7.3$  Hz, 2H).  $^{19}\text{F}$  NMR (376 MHz,  $\text{CD}_3\text{CN}$ )  $\delta$  -63.0.  $^{13}\text{C}$  NMR (101 MHz,  $\text{CD}_3\text{CN}$ )  $\delta$  200.9, 148.2, 145.8, 138.1, 133.9, 129.7 (q,  $J = 32.2$  Hz), 129.6, 128.8, 127.8, 126.2 (q,  $J = 3.9$  Hz), 125.5 (q,  $J = 271.0$  Hz), 115.6, 38.4, 35.0, 23.6. GC/MS ( $m/z$ , relative intensity)  $\text{M}^+$  (318.1, <5).

### 2c 5-phenyl-1-(4-(trifluoromethyl)phenyl)hex-5-en-1-one

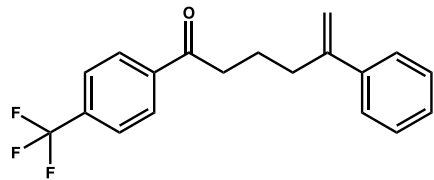

General procedure E was followed using **1c** to give the product as a colorless oil with a yield of 92% (46 mg, 0.14 mmol).  $^1\text{H}$  NMR (400 MHz,  $\text{CD}_3\text{CN}$ )  $\delta$  8.05 (d,  $J = 8.1$  Hz, 2H), 7.79 (d,  $J = 8.2$  Hz, 2H), 7.49 – 7.45 (m, 2H), 7.38 – 7.25 (m, 3H), 5.32 (d,  $J = 1.5$  Hz, 1H), 5.11 (q,  $J = 1.4$  Hz, 1H), 3.05 (t,  $J = 7.2$  Hz, 2H), 2.62 (td,  $J = 7.5, 1.3$  Hz, 2H), 1.81 (p,  $J = 7.3$  Hz, 2H).  $^{19}\text{F}$  NMR (376 MHz,  $\text{CD}_3\text{CN}$ )  $\delta$  -63.6.  $^{13}\text{C}$  NMR (101 MHz,  $\text{CD}_3\text{CN}$ )

$\delta$  200.4, 149.2, 141.8, 141.2, 134.2 (q,  $J = 32.3$  Hz), 129.5, 129.4, 128.5, 127.1, 126.6 (q,  $J = 3.9$  Hz), 125.0 (q,  $J = 271.8$  Hz), 113.4, 38.8, 35.1, 23.5. GC/MS (m/z, relative intensity) M<sup>+</sup> (318.1, 5).

### 2d 1,5-diphenylhex-5-en-1-one

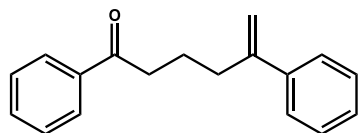

General procedure E was followed using **1d** to give the product as a colorless oil with a yield of 88% (44 mg, 0.18 mmol). <sup>1</sup>H NMR (400 MHz, Chloroform-d)  $\delta$  7.86 – 7.80 (m, 2H), 7.49 – 7.43 (m, 1H), 7.38 – 7.32 (m, 4H), 7.28 – 7.22 (m, 2H), 7.22 – 7.14 (m, 1H), 5.24 (d,  $J = 1.4$  Hz, 1H), 5.02 (q,  $J = 1.4$  Hz, 1H), 2.90 (t,  $J = 7.3$  Hz, 2H), 2.55 (td,  $J = 7.4, 1.3$  Hz, 2H), 1.84 (p,  $J = 7.4$  Hz, 2H). <sup>13</sup>C NMR (101 MHz, CDCl<sub>3</sub>)  $\delta$  200.3, 147.9, 141.0, 137.1, 133.0, 128.7, 128.5, 128.1, 127.6, 126.3, 113.1, 37.9, 34.8, 22.8. GC/MS (m/z, relative intensity) M<sup>+</sup> (250.2, 5).

### 2e 6-phenylhept-6-en-2-one

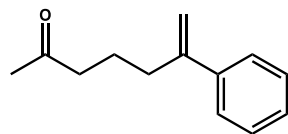

General procedure E was followed using **1e** to give the product as a colorless oil with a yield of 92% (46 mg, 0.24 mmol). <sup>1</sup>H NMR (400 MHz, CD<sub>2</sub>Cl<sub>2</sub>)  $\delta$  7.45 – 7.40 (m, 2H), 7.37 – 7.30 (m, 2H), 7.29 – 7.24 (m, 1H), 5.30 (d,  $J = 1.5$  Hz, 1H), 5.07 (q,  $J = 1.4$  Hz, 1H), 2.51 (td,  $J = 7.5, 1.3$  Hz, 2H), 2.44 (t,  $J = 7.3$  Hz, 2H), 2.07 (s, 3H), 1.70 (p,  $J = 7.4$  Hz, 2H). <sup>13</sup>C NMR (101 MHz, CD<sub>2</sub>Cl<sub>2</sub>)  $\delta$  208.9, 148.6, 141.5, 128.8, 128.0, 126.6, 113.0, 43.2, 35.0, 30.2, 22.8. GC/MS (m/z, relative intensity) M<sup>+</sup> (188.0, 15).

### 2f 8-(4-(trifluoromethyl)phenyl)nona-1,8-dien-4-one

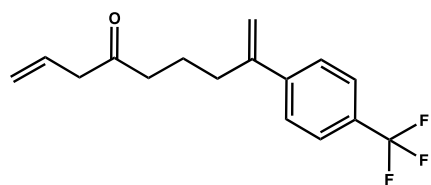

General procedure E was followed using **1f** to give the product as a colorless oil with a yield of 82% (41 mg, 0.15 mmol). <sup>1</sup>H NMR (400 MHz, CDCl<sub>3</sub>)  $\delta$  7.58 (d,  $J = 8.3$  Hz, 2H), 7.50 (d,  $J = 8.2$  Hz, 2H), 5.90 (ddt,  $J = 17.2, 10.2, 7.0$  Hz, 1H), 5.36 (s, 1H), 5.20 – 5.09 (m, 3H), 3.14 (dt,  $J = 7.0, 1.4$  Hz, 2H), 2.52 (td,  $J = 7.5, 1.2$  Hz, 2H), 2.47 (t,  $J = 7.2$  Hz, 2H), 1.73 (p,  $J = 7.3$  Hz, 2H). <sup>19</sup>F NMR (376 MHz, CDCl<sub>3</sub>)  $\delta$  -62.5. <sup>13</sup>C NMR (101 MHz, CDCl<sub>3</sub>)  $\delta$  208.4, 146.9, 144.6, 130.7, 129.6 (q,  $J = 32.4$  Hz), 126.6, 125.46 (q,  $J = 3.8$  Hz), 124.3

(q,  $J = 271.9$  Hz), 119.0, 114.9, 48.0, 41.4, 34.5, 22.0. GC/MS ( $m/z$ , relative intensity)  $M^+$  (282.2, 20).

### 2g 1-(dimethylamino)-8-(4-(trifluoromethyl)phenyl)non-8-en-2-yn-4-one

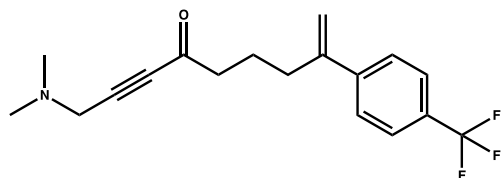

General procedure E was followed using **1g** to give the product as a yellow oil with a yield of 89% (45 mg, 0.14 mmol).  $^1\text{H}$  NMR (400 MHz,  $\text{CD}_3\text{CN}$ )  $\delta$  7.66 (d,  $J = 8.3$  Hz, 2H),  $\delta$  7.62 (d,  $J = 8.4$  Hz, 2H), 5.43 (s, 1H), 5.22 (q,  $J = 1.3$  Hz, 1H), 3.39 (s, 2H), 2.62 – 2.54 (m, 4H), 2.20 (s, 6H), 1.76 (p,  $J = 7.4$  Hz, 2H).  $^{19}\text{F}$  NMR (376 MHz,  $\text{CD}_3\text{CN}$ )  $\delta$  -63.0.  $^{13}\text{C}$  NMR (101 MHz,  $\text{CD}_3\text{CN}$ )  $\delta$  187.8, 147.4, 145.2, 129.3 (q,  $J = 32.2$  Hz), 127.4, 125.9 (q,  $J = 3.8$  Hz), 125.1 (q,  $J = 271.1$  Hz), 115.4, 88.8, 84.9, 47.7, 45.0, 43.8, 34.3, 23.0. GC/MS did not show  $M^+$ ; however, HRMS was obtained on this compound. HRMS ( $m/z$ ) calculated for  $\text{C}_{18}\text{H}_{20}\text{F}_3\text{NO}$  (Orbitrap-FTMS,  $(M + \text{H})^+$ ) 324.1575, found 324.1565.

### 2h 8-phenylnon-8-en-2-yn-4-one

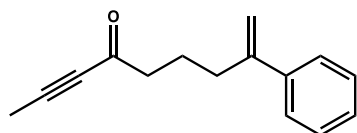

General procedure E was followed using **1h** to give the product as a colorless oil with a yield of 92% (46 mg, 0.22 mmol).  $^1\text{H}$  NMR (400 MHz,  $\text{CD}_2\text{Cl}_2$ )  $\delta$  7.44 – 7.40 (m, 2H), 7.36 – 7.31 (m, 2H), 7.30 – 7.25 (m, 1H), 5.31 (d,  $J = 1.5$  Hz, 1H), 5.08 (q,  $J = 1.3$  Hz, 1H), 2.54 (t,  $J = 7.4$  Hz, 2H), 2.53 (t,  $J = 7.4$  Hz, 2H), 1.99 (s, 3H), 1.78 (p,  $J = 7.4$  Hz, 2H).  $^{13}\text{C}$  NMR (101 MHz,  $\text{CD}_2\text{Cl}_2$ )  $\delta$  188.2, 148.3, 141.4, 128.9, 128.0, 126.7, 113.2, 90.4, 80.5, 45.2, 34.9, 23.1, 4.3. GC/MS ( $m/z$ , relative intensity)  $M^+$  (211.0, <5).

### 2i 7-(4-(trifluoromethyl)phenyl)oct-7-en-1-yn-3-one

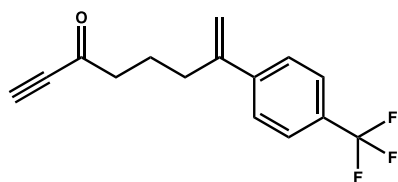

General procedure E was followed using **1i** to give the product as a colorless oil with a yield of 93% (47 mg, 0.17 mmol).  $^1\text{H}$  NMR (400 MHz,  $\text{CD}_2\text{Cl}_2$ )  $\delta$  7.60 (d,  $J = 8.3$  Hz, 2H), 7.54 (d,  $J = 8.2$  Hz, 2H), 5.40 (d,  $J = 1.1$  Hz, 1H), 5.20 (q,  $J = 1.2$  Hz, 1H), 3.26 (s, 1H), 2.62 (t,  $J = 7.2$  Hz, 2H), 2.56 (td,  $J = 7.5, 1.3$  Hz, 2H), 1.80 (p,  $J = 7.4$  Hz, 2H).  $^{19}\text{F}$  NMR (376 MHz,  $\text{CD}_2\text{Cl}_2$ )  $\delta$  -62.8.  $^{13}\text{C}$  NMR (101 MHz,  $\text{CD}_2\text{Cl}_2$ )  $\delta$  187.3, 147.1, 145.1 (d,  $J = 1.5$  Hz),

129.8 (q,  $J = 32.3$  Hz), 127.1, 125.8 (q,  $J = 3.8$  Hz), 124.9 (q,  $J = 272.27$  Hz), 115.5, 81.8, 78.7, 45.1, 34.6, 22.6. GC/MS (m/z, relative intensity) M+ (265.9, 30).

### 2j 5-(p-tolyl)hex-5-enal

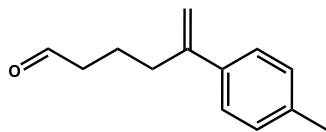

General procedure **E** was followed using **1j** to give the product as a colorless oil with a yield of 92% (46 mg, 0.24 mmol).  $^1\text{H}$  NMR (400 MHz,  $\text{CDCl}_3$ )  $\delta$  9.74 (t,  $J = 1.7$  Hz, 1H), 7.32 – 7.28 (m, 2H), 7.15 (d,  $J = 8.0$  Hz, 2H), 5.29 (d,  $J = 1.5$  Hz, 1H), 5.03 (q,  $J = 1.4$  Hz, 1H), 2.55 (td,  $J = 7.4, 1.2$  Hz, 2H), 2.45 (td,  $J = 7.3, 1.7$  Hz, 2H), 2.35 (s, 3H), 1.80 (p,  $J = 7.3$  Hz, 2H).  $^{13}\text{C}$  NMR (101 MHz,  $\text{CDCl}_3$ )  $\delta$  202.5, 147.2, 137.7, 137.3, 129.1, 126.0, 112.4, 43.2, 34.5, 21.1, 20.6. GC/MS (m/z, relative intensity) M+ (188.0, 10).

### 2k 5-(4-(trifluoromethyl)phenyl)hex-5-enal

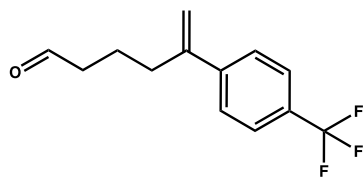

General procedure **E** was followed using **1k** to give the product as a colorless oil with a yield of 90% (45 mg, 0.19 mmol).  $^1\text{H}$  NMR (400 MHz,  $\text{CD}_2\text{Cl}_2$ )  $\delta$  9.73 (t,  $J = 1.5$  Hz, 1H), 7.61 (d,  $J = 8.2$  Hz, 2H), 7.54 (d,  $J = 8.2$  Hz, 2H), 5.40 (apparent singlet, 1H), 5.20 (q,  $J = 1.3$  Hz, 1H), 2.57 (td,  $J = 7.5, 1.3$  Hz, 2H), 2.46 (td,  $J = 7.2, 1.5$  Hz, 2H), 1.76 (p,  $J = 7.4$  Hz, 2H).  $^{19}\text{F}$  NMR (376 MHz,  $\text{CD}_2\text{Cl}_2$ )  $\delta$  -62.8.  $^{13}\text{C}$  NMR (101 MHz,  $\text{CD}_2\text{Cl}_2$ )  $\delta$  202.5, 147.2, 145.1 (d,  $J = 1.5$  Hz), 129.8 (q,  $J = 32.3$  Hz), 127.1, 125.8 (q,  $J = 3.9$  Hz), 124.9 (q,  $J = 271.7$  Hz), 115.3, 43.6, 34.8, 21.0. GC/MS (m/z, relative intensity) M+ (242.0, 10).

### 2l 5-phenylhex-5-enal

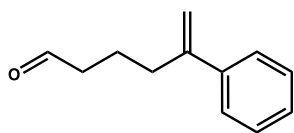

General procedure **E** was followed using **1l** to give the product as a colorless oil with a yield of 92% (46 mg, 0.26 mmol).  $^1\text{H}$  NMR (400 MHz,  $\text{CD}_2\text{Cl}_2$ )  $\delta$  9.62 (t,  $J = 1.6$  Hz, 1H), 7.34 – 7.30 (m, 2H), 7.27 – 7.21 (m, 2H), 7.20 – 7.15 (m, 1H), 5.22 (d,  $J = 1.4$  Hz, 1H), 4.99 (q,  $J = 1.4$  Hz, 1H), 2.46 (td,  $J = 7.5, 1.3$  Hz, 2H), 2.34 (td,  $J = 7.3, 1.6$  Hz, 2H), 1.66 (p,  $J = 7.4$  Hz, 2H).  $^{13}\text{C}$  NMR (101 MHz,  $\text{CD}_2\text{Cl}_2$ )  $\delta$  202.8, 148.3, 141.3, 128.9, 128.0, 126.6, 113.3, 43.7, 35.0, 21.2. GC/MS (m/z, relative intensity) M+ (174.0, 5).

### 2m 5-(4-methoxyphenyl)hex-5-enal

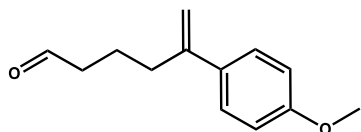

General procedure **E** was followed using **1m** to give the product as a colorless oil with a yield of 95% (48 mg, 0.23 mmol).  $^1\text{H}$  NMR (400 MHz,  $\text{CD}_2\text{Cl}_2$ )  $\delta$  9.72 (t,  $J = 1.6$  Hz, 1H), 7.39 – 7.34 (m, 2H), 6.90 – 6.84 (m, 2H), 5.24 (d,  $J = 1.5$  Hz, 1H), 4.99 (q,  $J = 1.3$  Hz, 1H), 3.80 (s, 3H), 2.53 (td,  $J = 7.5, 1.2$  Hz, 2H), 2.43 (td,  $J = 7.3, 1.6$  Hz, 2H), 1.76 (p,  $J = 7.4$  Hz, 2H).  $^{13}\text{C}$  NMR (101 MHz,  $\text{CD}_2\text{Cl}_2$ )  $\delta$  202.9, 159.8, 147.5, 133.6, 127.7, 114.19, 111.7, 55.8, 43.7, 35.0, 21.2. GC/MS did not show  $\text{M}^+$ ; however, HRMS was obtained on this compound. HRMS ( $m/z$ ) calculated for  $\text{C}_{13}\text{H}_{16}\text{O}_2$  (Orbitrap-FTMS,  $(\text{M} + \text{H})^+$ ) 205.1229, found 205.1226.

### 2n 5-(furan-2-yl)hex-5-enal

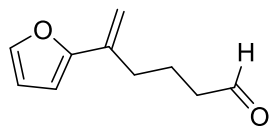

General procedure **E** was followed using **1n** (50 mg, 305  $\mu\text{mol}$ ) and employing buffered silica gel chromatography (gradient 0-20%  $\text{CH}_2\text{Cl}_2$  in hexane with 1% triethylamine) to give the product as a yellow oil with a yield of 80% (40.2 mg).  $^1\text{H}$  NMR (599 MHz, Acetonitrile- $d_3$ )  $\delta$  9.70 (t,  $J = 1.5$  Hz, 1H), 7.44 (d,  $J = 1.4$  Hz, 1H), 6.44 (d,  $J = 1.4$  Hz, 2H), 5.50 (d,  $J = 1.4$  Hz, 1H), 5.00 (t,  $J = 1.3$  Hz, 1H), 2.47 (td,  $J = 7.2, 1.5$  Hz, 2H), 2.42 – 2.36 (m, 2H), 1.82 (p,  $J = 7.3$  Hz, 2H).  $^{13}\text{C}$  NMR (151 MHz, Acetonitrile- $d_3$ )  $\delta$  203.7, 155.2, 143.3, 138.2, 112.3, 110.2, 107.6, 43.7, 33.1, 22.1. GC/MS ( $m/z$ , relative intensity)  $\text{M}^+$  (164, 5).

### 2o 5-(pyridin-2-yl)hex-5-enal

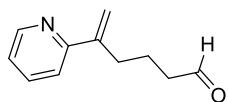

General procedure **E** was followed using **1o** (28 mg, 160  $\mu\text{mol}$ ) with a small modification to the workup. Neutralization was performed with concentrated  $\text{NaOH}_{(\text{aq})}$  (1 mL), rather than  $\text{NaHCO}_3$  solution. An internal standard (1,2,4,5 tetrafluorobenzene, 78 micromoles) was used to determine a 96% NMR yield in lieu of column chromatography, which led to product degradation.  $^1\text{H}$  NMR (800.3 MHz,  $\text{CDCl}_3$ )  $\delta$  9.76 (t,  $J = 1.7$  Hz, 1H),  $\delta$  8.56 (ddd,  $J = 4.8, 1.9, 0.9$  Hz, 1H),  $\delta$  7.64 (td,  $J = 7.7, 7.7, 1.9$  Hz, 1H),  $\delta$  7.47 (dt,  $J = 8.0, 1.0, 1.0$  Hz, 1H),  $\delta$  7.15 (ddd,  $J = 7.5, 4.8, 1.2$  Hz, 1H),  $\delta$  5.74 (d,  $J = 1.2$  Hz, 1H),  $\delta$  5.28 (q,  $J = 1.3$  Hz, 1H),  $\delta$  1.68 (td,  $J = 7.6, 7.5, 1.3$  Hz, 2H),  $\delta$  2.48 (td,  $J = 7.4, 7.4, 1.7$  Hz, 2H),  $\delta$  1.85 (p,  $J = 7.4$  Hz, 2H).  $^{13}\text{C}$  NMR (201.3 MHz,  $\text{CDCl}_3$ )  $\delta$  202.9, 158.3, 149.2, 147.6, 136.6, 122.5, 120.7, 115.9, 43.6, 33.2, 21.1. CI GCMS ( $m/z$ , relative intensity)  $[\text{M}+1] = 176$ .



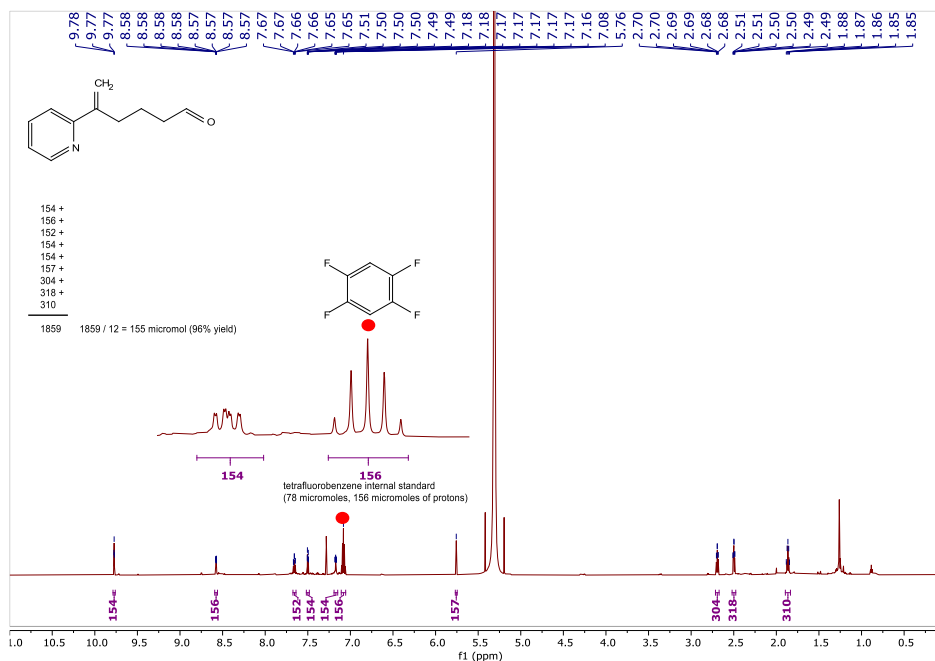

### 6-phenylhept-6-enal

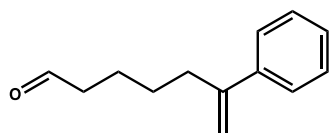

General procedure **E** was followed using **3** to give the product as a colorless oil with a yield of 87% (44 mg, 0.23 mmol). <sup>1</sup>H NMR (400 MHz, CDCl<sub>3</sub>) δ 9.66 (t, *J* = 1.8 Hz, 1H), 7.34 – 7.29 (m, 2H), 7.29 – 7.23 (m, 2H), 7.22 – 7.17 (m, 1H), 5.20 (d, *J* = 1.5 Hz, 1H), 4.99 (q, *J* = 1.4 Hz, 1H), 2.46 (td, *J* = 7.4, 1.3 Hz, 2H), 2.35 (td, *J* = 7.3, 1.8 Hz, 2H), 1.64 – 1.55 (m, 2H), 1.47 – 1.37 (m, 2H). <sup>13</sup>C NMR (101 MHz, CDCl<sub>3</sub>) δ 202.7, 148.1, 141.2, 128.5, 127.5, 126.2, 112.8, 43.8, 35.2, 27.8, 21.8. GC/MS (m/z, relative intensity) M<sup>+</sup> (188.1, <5).

### 8 3,5-diphenylhex-5-enal

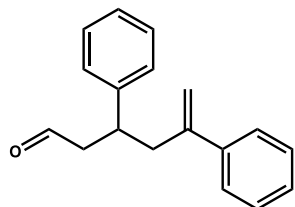

General procedure **E** was followed using **7** to give the product as a colorless oil with a yield of 89% (45 mg, 0.18 mmol). <sup>1</sup>H NMR (400 MHz, CD<sub>2</sub>Cl<sub>2</sub>) δ 9.56 (t, *J* = 2.0 Hz, 1H), 7.43 – 7.24 (m, 7H), 7.23 – 7.18 (m, 1H), 7.16 – 7.11 (m, 2H), 5.24 (d, *J* = 1.5 Hz, 1H), 4.96 (q, *J* = 1.3 Hz, 1H), 3.29 (dddd, *J* = 7.8, 7.8, 7.8, 6.0 Hz, 1H), 2.86 (dd, *J* = 7.5, 1.1 Hz, 2H), 2.82 – 2.67 (m, 2H). <sup>13</sup>C NMR (101 MHz, CD<sub>2</sub>Cl<sub>2</sub>) δ 202.1, 146.7, 144.2, 141.0, 129.0, 129.0, 128.2, 128.0, 127.1, 126.9, 115.5, 49.9, 43.4, 38.8. GC/MS (m/z, relative intensity) M<sup>+</sup> (250.0, 5).

### 10 3,5-diphenyl-1-(4-(trifluoromethyl)phenyl)hex-5-en-1-one

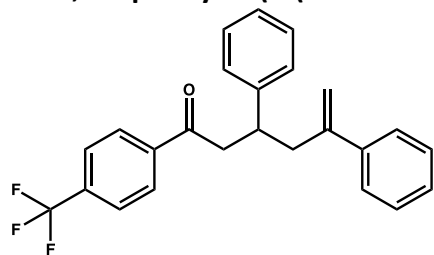

General procedure E was followed using **9** to give the product as a colorless oil with a yield of 82% (41 mg, 0.10 mmol).  $^1\text{H}$  NMR (400 MHz,  $\text{CD}_2\text{Cl}_2$ )  $\delta$  7.88 (d,  $J = 8.1$  Hz, 2H), 7.65 (d,  $J = 8.2$  Hz, 2H), 7.44 – 7.09 (m, 10H), 5.25 (d,  $J = 1.5$  Hz, 1H), 4.99 (d,  $J = 1.4$  Hz, 1H), 3.46 – 3.22 (m, 3H), 2.92 (dddd,  $J = 14.2, 14.2, 14.0, 7.3$  Hz, 2H).  $^{19}\text{F}$  NMR (376 MHz,  $\text{CD}_2\text{Cl}_2$ )  $\delta$  -63.4.  $^{13}\text{C}$  NMR (101 MHz,  $\text{CD}_2\text{Cl}_2$ )  $\delta$  221.6, 170.1, 167.7, 164.2, 163.5, 157.5 (q,  $J = 32.7$  Hz), 152.2, 152.1, 152.0, 151.4, 151.2, 150.2, 150.1, 149.2 (q,  $J = 3.8$  Hz), 138.6, 68.5, 66.3, 63.3. Quaternary carbon ( $\text{CF}_3$ ) signals not fully resolved. GC/MS ( $m/z$ , relative intensity)  $\text{M}^+$  (394.2, <5).

### 12 6-(4-(trifluoromethyl)phenyl)hept-6-en-2-one

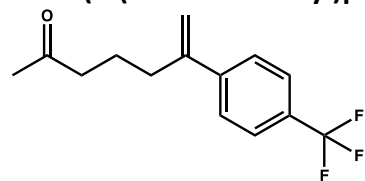

General procedure E was followed using **11a** or **11b** to give the product as a colorless oil with a yield of 90% (45 mg, 0.18 mmol).  $^1\text{H}$  NMR (400 MHz,  $\text{CDCl}_3$ )  $\delta$  7.58 (d,  $J = 8.2$  Hz, 2H), 7.50 (d,  $J = 8.2$  Hz, 2H), 5.36 (s, 1H), 5.16 (d,  $J = 1.3$  Hz, 1H), 2.52 (td,  $J = 7.5, 1.3$  Hz, 2H), 2.45 (t,  $J = 7.2$  Hz, 2H), 2.11 (s, 3H), 1.72 (p,  $J = 7.3$  Hz, 2H).  $^{19}\text{F}$  NMR (376 MHz,  $\text{CDCl}_3$ )  $\delta$  -62.5.  $^{13}\text{C}$  NMR (101 MHz,  $\text{CDCl}_3$ )  $\delta$  208.6, 146.9, 144.6, 129.6 (q,  $J = 32.4$  Hz), 126.5, 125.4 (q,  $J = 3.8$  Hz), 124.3 (q,  $J = 271.9$  Hz), 114.9, 42.8, 34.5, 30.1, 22.1. GC/MS ( $m/z$ , relative intensity)  $\text{M}^+$  (256.2, 5).

### 14 3-(1-methylene-1,2,3,4-tetrahydronaphthalen-2-yl)propanal

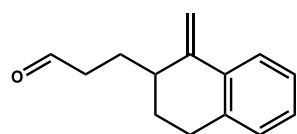

General procedure E was followed using **13** to give the product as a colorless oil with a yield of 80% (40 mg, 0.20 mmol).  $^1\text{H}$  NMR (400 MHz, Chloroform-*d*)  $\delta$  9.76 (t,  $J = 1.7$  Hz, 1H), 7.58 (dd,  $J = 7.5, 1.7$  Hz, 1H), 7.27 – 7.08 (m, 5H), 5.48 (s, 1H), 4.95 (s, 1H), 3.03 – 2.87 (m, 1H), 2.80 (m, 1H), 2.61 – 2.47 (m, 3H), 2.10 – 1.98 (m, 1H), 1.89 – 1.71 (m, 4H).  $^{13}\text{C}$  NMR (101 MHz,  $\text{CDCl}_3$ )  $\delta$  202.7, 146.2, 136.2, 134.1, 129.2, 127.9, 126.2, 125.3, 109.3, 42.1, 40.8, 28.4, 26.1, 24.3. GC/MS ( $m/z$ , relative intensity)  $\text{M}^+$  (200.1, 20).

## VI. Calculations

Computational studies have been performed utilizing the Gaussian 09 package<sup>7</sup>, on the Pete supercomputer at the High Performance Computing Center at Oklahoma State University. Several computations were performed using B3LYP theory and the 6-311++G(d,p) basis set<sup>8-10</sup>. Each compound was subjected to geometry optimization and frequency calculations to confirm structures are converged and stationary points are at minima. Energy calculations for the ground state *cis*-cyclohexenol **1a** and its subsequent product **2a** give evidence to the ring opening isomerization being an endothermic process, as the calculated  $\Delta H$  (change in enthalpy) was found to be +2.6 kcal/mol. The sums of electronic and thermal enthalpies are listed below each molecule.

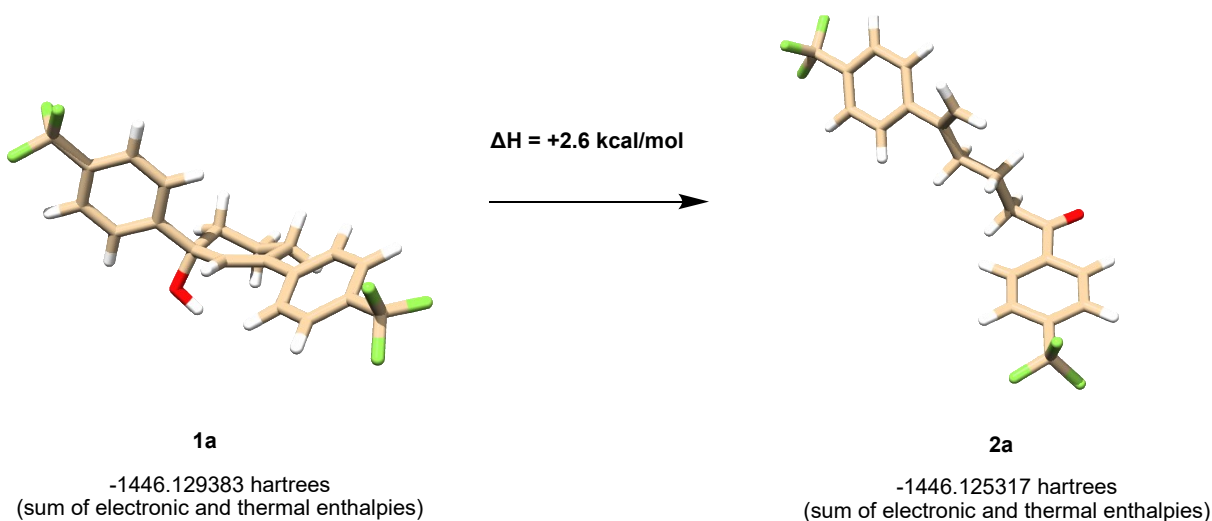

Upon intersystem crossing, during the formation of the *trans*-cyclohexene, four potential diastereomers are formed. Because acid pre-coordination has been found to be key,<sup>11</sup> of the four diastereomers, only two lead to ring opening (those with axial hydroxy groups). The diastereomers and their energies are listed below. The  $\Delta E$  values represent the energy difference between ground state *cis*-cyclohexene and the ground state *trans*-cyclohexene diastereomer. The total energies for the ground state *cis*-cyclohexene (**1a**) and for the individual *trans* conformers are listed along with their cartesian coordinates on the following pages (see pages E31-E36).

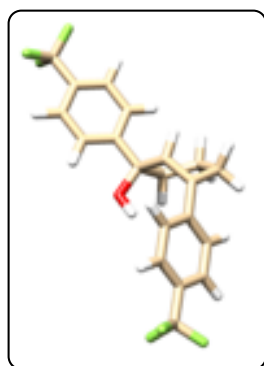

$\Delta E = +57.5$  kcal/mol

**1a-D1**

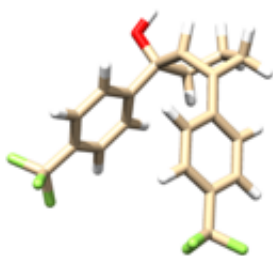

$\Delta E = +60.8$  kcal/mol

**1a-D2**

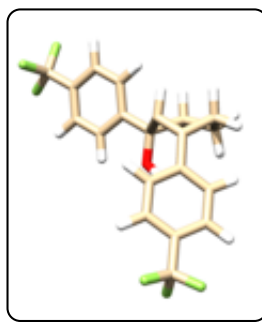

$\Delta E = +52.8$  kcal/mol

**1a-D3**

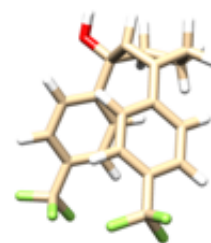

$\Delta E = +68.2$  kcal/mol

**1a-D4**

1a

E = -1446.47335775 hartrees

Cartesian Coordinates:

```
C1 -1.126000000 2.765000000 -1.079000000
C2 0.034000000 3.708000000 -0.745000000
C3 1.347000000 2.933000000 -0.638000000
C4 1.285000000 1.863000000 0.476000000
C5 -0.042000000 1.131000000 0.467000000
C6 -1.140000000 1.529000000 -0.199000000
C7 2.447000000 0.881000000 0.326000000
O8 1.445000000 2.488000000 1.770000000
C9 -2.407000000 0.756000000 -0.113000000
C10 -3.275000000 0.675000000 -1.212000000
C11 -4.456000000 -0.057000000 -1.146000000
C12 -4.804000000 -0.713000000 0.033000000
C13 -3.961000000 -0.633000000 1.144000000
C14 -2.782000000 0.095000000 1.069000000
C15 3.526000000 0.891000000 1.211000000
C16 4.588000000 0.004000000 1.043000000
C17 4.578000000 -0.907000000 -0.011000000
C18 3.502000000 -0.928000000 -0.900000000
C19 2.448000000 -0.040000000 -0.728000000
F20 -5.809000000 -2.853000000 -0.148000000
C21 -6.056000000 -1.541000000 0.105000000
F22 -6.988000000 -1.145000000 -0.791000000
F23 -6.632000000 -1.490000000 1.329000000
F24 5.382000000 -2.993000000 -0.808000000
C25 5.746000000 -1.829000000 -0.222000000
F26 6.369000000 -2.144000000 0.936000000
F27 6.690000000 -1.273000000 -1.027000000
H28 -1.052000000 2.458000000 -2.132000000
H29 -2.082000000 3.288000000 -0.986000000
H30 0.116000000 4.486000000 -1.510000000
H31 -0.175000000 4.229000000 0.197000000
H32 1.556000000 2.444000000 -1.595000000
H33 2.189000000 3.594000000 -0.421000000
H34 -0.072000000 0.234000000 1.077000000
H35 0.626000000 2.948000000 1.980000000
H36 -3.026000000 1.177000000 -2.138000000
H37 -5.108000000 -0.112000000 -2.009000000
H38 -4.237000000 -1.123000000 2.069000000
H39 -2.154000000 0.174000000 1.948000000
H40 3.528000000 1.588000000 2.037000000
H41 5.417000000 0.018000000 1.740000000
H42 3.485000000 -1.642000000 -1.714000000
H43 1.610000000 -0.076000000 -1.416000000
```

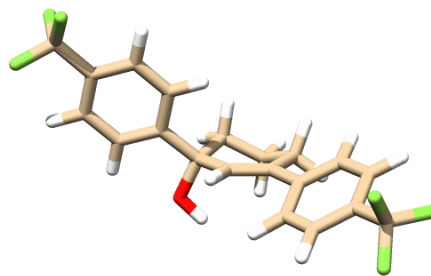

2a

E = -1446.46821518

Cartesian Coordinates:

C1 -3.373000000 0.216000000 0.601000000  
C2 -1.964000000 0.547000000 0.958000000  
C3 -1.051000000 0.935000000 -0.191000000  
C4 0.375000000 1.347000000 0.183000000  
C5 1.195000000 1.751000000 -1.060000000  
C6 2.593000000 2.215000000 -0.680000000  
C7 3.693000000 1.205000000 -0.484000000  
C8 -4.437000000 0.677000000 1.392000000  
C9 -5.755000000 0.367000000 1.080000000  
C10 -6.040000000 -0.410000000 -0.043000000  
C11 -4.999000000 -0.872000000 -0.847000000  
C12 -3.683000000 -0.554000000 -0.530000000  
C13 4.951000000 1.672000000 -0.074000000  
C14 6.004000000 0.791000000 0.122000000  
C15 5.812000000 -0.577000000 -0.090000000  
C16 4.569000000 -1.058000000 -0.495000000  
C17 3.517000000 -0.167000000 -0.693000000  
C18 -1.563000000 0.503000000 2.234000000  
O19 2.815000000 3.398000000 -0.502000000  
F20 7.103000000 -1.772000000 1.495000000  
C21 6.949000000 -1.530000000 0.169000000  
F22 8.129000000 -1.041000000 -0.273000000  
F23 6.764000000 -2.727000000 -0.427000000  
F24 -8.340000000 0.168000000 0.026000000  
C25 -7.461000000 -0.786000000 -0.357000000  
F26 -7.834000000 -1.929000000 0.278000000  
F27 -7.656000000 -1.001000000 -1.678000000  
H28 -1.002000000 0.101000000 -0.901000000  
H29 -1.531000000 1.753000000 -0.744000000  
H30 0.350000000 2.195000000 0.874000000  
H31 0.874000000 0.526000000 0.708000000  
H32 1.233000000 0.921000000 -1.772000000  
H33 0.714000000 2.595000000 -1.558000000  
H34 -4.227000000 1.307000000 2.248000000  
H35 -6.561000000 0.744000000 1.697000000  
H36 -5.215000000 -1.473000000 -1.721000000  
H37 -2.891000000 -0.930000000 -1.166000000  
H38 5.080000000 2.736000000 0.083000000  
H39 6.974000000 1.161000000 0.431000000  
H40 4.425000000 -2.117000000 -0.663000000  
H41 2.560000000 -0.558000000 -1.014000000  
H42 -0.553000000 0.756000000 2.532000000  
H43 -2.235000000 0.195000000 3.026000000

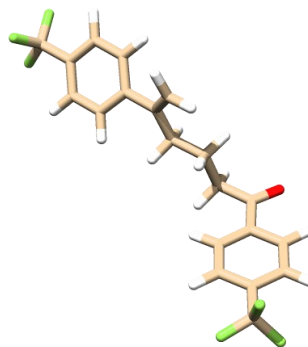

## 1a-D1

E = -1446.38178480 hartrees

Cartesian Coordinates:

C1 -0.9307850000 3.1489990000 -0.6397200000  
H2 -0.3985090000 3.6637020000 -1.4437090000  
C3 -1.1389730000 1.6905820000 -0.9748540000  
C4 -2.3695530000 0.9748130000 -0.6599570000  
C5 -3.4297420000 1.5347800000 0.0860350000  
C6 -4.5887980000 0.8160160000 0.3361440000  
C7 -4.7320500000 -0.4838180000 -0.1577210000  
C8 -3.7059630000 -1.0559430000 -0.9097200000  
C9 -2.5495670000 -0.3310340000 -1.1700390000  
H10 -1.7814120000 -0.7502540000 -1.8085270000  
H11 -3.8215220000 -2.0534580000 -1.3149130000  
C12 -5.9712050000 -1.2730550000 0.1597430000  
F13 -7.0679870000 -0.4866910000 0.2533620000  
F14 -5.8627910000 -1.9233250000 1.3479900000  
F15 -6.2327690000 -2.2156730000 -0.7722710000  
H16 -5.3869900000 1.2638960000 0.9152290000  
H17 -3.3396750000 2.5340420000 0.4922360000  
C18 0.0964350000 1.0956710000 -1.0056370000  
H19 0.8755590000 1.7589880000 -1.3847360000  
C20 0.6154930000 0.4681360000 0.2802950000  
C21 0.3169900000 1.7365340000 1.2706820000  
C22 0.0086290000 3.1381560000 0.6570540000  
H23 0.9449050000 3.6410430000 0.3992270000  
H24 -0.4517780000 3.7415120000 1.4457080000  
H25 -0.5599630000 1.4022050000 1.8299860000  
H26 1.1358810000 1.8305810000 1.9879580000  
O27 -0.0570350000 -0.6667640000 0.7871490000  
H28 -1.0035770000 -0.5720200000 0.6295840000  
C29 2.0953300000 0.1108400000 0.1986080000  
C30 3.0712210000 1.1082670000 0.0934620000  
C31 4.4194100000 0.7851960000 -0.0123400000  
H32 5.1607850000 1.5696500000 -0.0982900000  
C33 4.8131880000 -0.5524790000 -0.0108070000  
C34 3.8529840000 -1.5567640000 0.1012840000  
C35 2.5051060000 -1.2253250000 0.2024160000  
H36 1.7609620000 -2.0043290000 0.2909280000  
H37 4.1544790000 -2.5970460000 0.1031160000  
C38 6.2729300000 -0.9053610000 -0.0667990000  
F39 6.4921260000 -2.0945050000 -0.6721990000  
F40 6.8199320000 -0.9996790000 1.1739870000  
F41 6.9996130000 0.0208800000 -0.7345270000  
H42 2.7879630000 2.1541230000 0.0966800000  
H43 -1.8604260000 3.6971320000 -0.4735240000

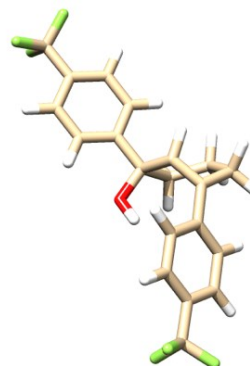

## 1a-D2

E = -1446.37654325 hartrees

Cartesian Coordinates:

C1 -4.0206370000 -1.9454190000 0.1620700000  
H2 -4.5580780000 -2.6036560000 0.8490970000  
C3 -2.7856010000 -1.3706680000 0.8214930000  
C4 -2.3266680000 -0.0080010000 0.5662870000  
C5 -2.9248560000 0.8357290000 -0.3923650000  
C6 -2.4687140000 2.1340990000 -0.5875060000  
C7 -1.4116130000 2.6273090000 0.1836420000  
C8 -0.8160180000 1.8152310000 1.1507380000  
C9 -1.2786120000 0.5220620000 1.3465010000  
H10 -0.8663090000 -0.0902690000 2.1370030000  
H11 -0.0056220000 2.1991180000 1.7559000000  
C12 -0.8913250000 4.0139590000 -0.0718350000  
F13 -1.8699460000 4.8702020000 -0.4457930000  
F14 0.0330700000 4.0329340000 -1.0691730000  
F15 -0.2922910000 4.5485930000 1.0131560000  
H16 -2.9408890000 2.7722520000 -1.3245750000  
H17 -3.7419230000 0.4764460000 -1.0017420000  
C18 -1.9466210000 -2.4197740000 1.1063850000  
H19 -2.4929540000 -3.3210240000 1.4086290000  
C20 -0.9490990000 -2.8323120000 0.0201020000  
C21 -1.8904720000 -2.6921460000 -1.2630590000  
C22 -3.4266210000 -2.8423670000 -1.0246040000  
H23 -3.6680500000 -3.8903650000 -0.8223050000  
H24 -3.9335510000 -2.5922140000 -1.9610120000  
H25 -1.7108410000 -1.6957370000 -1.6714290000  
H26 -1.5680520000 -3.4195930000 -2.0120710000  
C27 0.3791370000 -2.0731230000 -0.0708460000  
C28 0.8703990000 -1.5006330000 -1.2409700000  
H29 0.2947210000 -1.5391460000 -2.1555980000  
C30 2.1081680000 -0.8572890000 -1.2621490000  
C31 2.8802440000 -0.7979410000 -0.1035920000  
C32 2.4148160000 -1.3977970000 1.0707630000  
C33 1.1807980000 -2.0294420000 1.0798580000  
H34 0.8213190000 -2.4942550000 1.9897350000  
H35 3.0171720000 -1.3702210000 1.9705540000  
C36 4.2320480000 -0.1375460000 -0.1011880000  
F37 4.4431980000 0.6331140000 -1.1927100000  
F38 5.2376050000 -1.0465060000 -0.0779620000  
F39 4.4188900000 0.6533920000 0.9835930000  
H40 2.4680700000 -0.4058860000 -2.1776210000  
O41 -0.5449270000 -4.1977270000 0.2010820000  
H42 -1.3320700000 -4.7364890000 0.3620350000  
H43 -4.7307690000 -1.1963190000 -0.1936070000

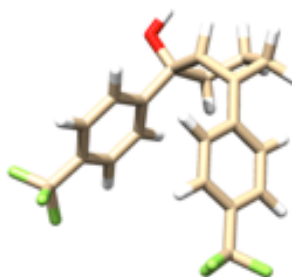



## 1a-D3

E = -1446.38914414 hartrees

Cartesian Coordinates:

C1 -1.2099260000 3.3574890000 -0.5323490000  
C2 -1.2326450000 1.9023610000 -0.9342480000  
C3 -2.3695710000 1.0387280000 -0.6355890000  
C4 -3.5376560000 1.4883890000 0.0214740000  
C5 -4.6128260000 0.6399150000 0.2358420000  
C6 -4.5599690000 -0.6872030000 -0.2000650000  
C7 -3.4235980000 -1.1541900000 -0.8612590000  
C8 -2.3547290000 -0.2990770000 -1.0927560000  
H9 -1.5004850000 -0.6438640000 -1.6623860000  
H10 -3.3862190000 -2.1749820000 -1.2205580000  
C11 -5.7067650000 -1.6159740000 0.0825970000  
F12 -6.8955860000 -0.9704950000 0.1029930000  
F13 -5.5786880000 -2.2218590000 1.2926230000  
F14 -5.8043390000 -2.6050500000 -0.8331920000  
H15 -5.4974730000 1.0069730000 0.7414000000  
H16 -3.6000730000 2.5075980000 0.3806160000  
C17 0.0720790000 1.4648390000 -0.9805480000  
C18 0.6872320000 0.9726010000 0.3172130000  
C19 0.6929950000 2.4247670000 1.0531060000  
C20 -0.6096970000 3.2560630000 0.9329370000  
H21 -1.3739460000 2.8258510000 1.5873050000  
H22 -0.4121220000 4.2643330000 1.3120420000  
H23 0.9031450000 2.2162410000 2.1062910000  
H24 1.5339220000 3.0003530000 0.6603510000  
C25 2.1060140000 0.4186820000 0.2163860000  
C26 2.4337690000 -0.7991720000 0.8177430000  
C27 3.7249620000 -1.3146300000 0.7309680000  
C28 4.7111260000 -0.6141570000 0.0417580000  
C29 4.3992160000 0.6037650000 -0.5643490000  
C30 3.1099210000 1.1122340000 -0.4726910000  
H31 2.8971980000 2.0605020000 -0.9512130000  
H32 5.1621450000 1.1556040000 -1.0994780000  
C33 6.0940450000 -1.1843240000 -0.1024860000  
F34 7.0465170000 -0.2215910000 -0.0967150000  
F35 6.2434300000 -1.8608330000 -1.2717280000  
F36 6.4010510000 -2.0532960000 0.8860000000  
H37 3.9620670000 -2.2579230000 1.2068150000  
H38 1.6705410000 -1.3445290000 1.3540750000  
O39 -0.0738710000 0.0656630000 1.0790850000  
H40 -1.0124280000 0.1940780000 0.9017340000  
H41 0.7519360000 2.1949060000 -1.4189130000  
H42 -0.5259260000 3.9325290000 -1.1620960000  
H43 -2.1766230000 3.8685160000 -0.5305880000

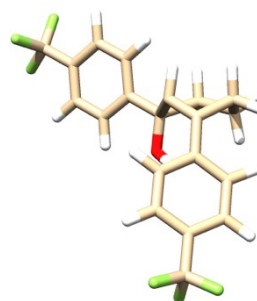

## 1a-D4

E = -1446.36461776 hartrees

Cartesian Coordinates:

C1 -3.4899460000 -2.4163000000 0.5318650000  
C2 -2.5541060000 -1.7931610000 -0.4719700000  
C3 -1.1059180000 -1.8851540000 -0.3268080000  
C4 -0.4796010000 -2.5048080000 0.7749190000  
C5 0.9003750000 -2.6196310000 0.8441760000  
C6 1.6981720000 -2.1208480000 -0.1887810000  
C7 1.1011500000 -1.5234950000 -1.2991280000  
C8 -0.2808290000 -1.4221940000 -1.3710680000  
H9 -0.7468450000 -1.0042610000 -2.2543940000  
H10 1.7156950000 -1.1487350000 -2.1078000000  
C11 3.1887350000 -2.2985720000 -0.1234440000  
F12 3.5652390000 -3.5520720000 -0.4948640000  
F13 3.6664950000 -2.1162740000 1.1307640000  
F14 3.8486480000 -1.4428810000 -0.9312710000  
H15 1.3615740000 -3.0875200000 1.7055280000  
H16 -1.0726720000 -2.8828410000 1.5979370000  
C17 -3.2219560000 -0.7631740000 -1.0953320000  
C18 -3.1949210000 0.5956430000 -0.4172160000  
C19 -3.9978130000 0.1562890000 0.9148710000  
C20 -3.6751840000 -1.2205940000 1.5584600000  
H21 -2.7651910000 -1.1481120000 2.1602260000  
H22 -4.4827790000 -1.4724310000 2.2539850000  
H23 -3.8862220000 0.9533150000 1.6559220000  
H24 -5.0496380000 0.1635260000 0.6139770000  
O25 -3.9662410000 1.5887410000 -1.0914850000  
H26 -4.7379670000 1.1657050000 -1.4847350000  
C27 -1.8418150000 1.2504890000 -0.1686190000  
C28 -1.1825140000 1.2148670000 1.0589350000  
C29 0.0543280000 1.8358580000 1.2281180000  
C30 0.6397480000 2.5141870000 0.1645580000  
C31 1.9907250000 3.1569940000 0.3134400000  
F32 2.3330120000 3.3510490000 1.6061200000  
F33 2.0486900000 4.3639300000 -0.2988560000  
F34 2.9731300000 2.4009100000 -0.2405930000  
C35 -0.0164200000 2.5729860000 -1.0675030000  
C36 -1.2436600000 1.9466770000 -1.2276040000  
H37 -1.7595110000 2.0060580000 -2.1769810000  
H38 0.4283770000 3.1145820000 -1.8936510000  
H39 0.5524570000 1.7976490000 2.1883200000  
H40 -1.6198320000 0.7032740000 1.9052870000  
H41 -4.2762210000 -1.0040470000 -1.2795580000  
H42 -4.4567260000 -2.6507540000 0.0784130000  
H43 -3.1227900000 -3.3136550000 1.0364940000

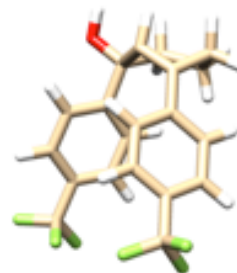

## VII. NMR Spectra

1a 4,4''-bis(trifluoromethyl)-5',6'-dihydro-[1,1':3,1''-terphenyl]-1'(4'H)-ol  
1H NMR at 400.15 MHz in CDCl<sub>3</sub>

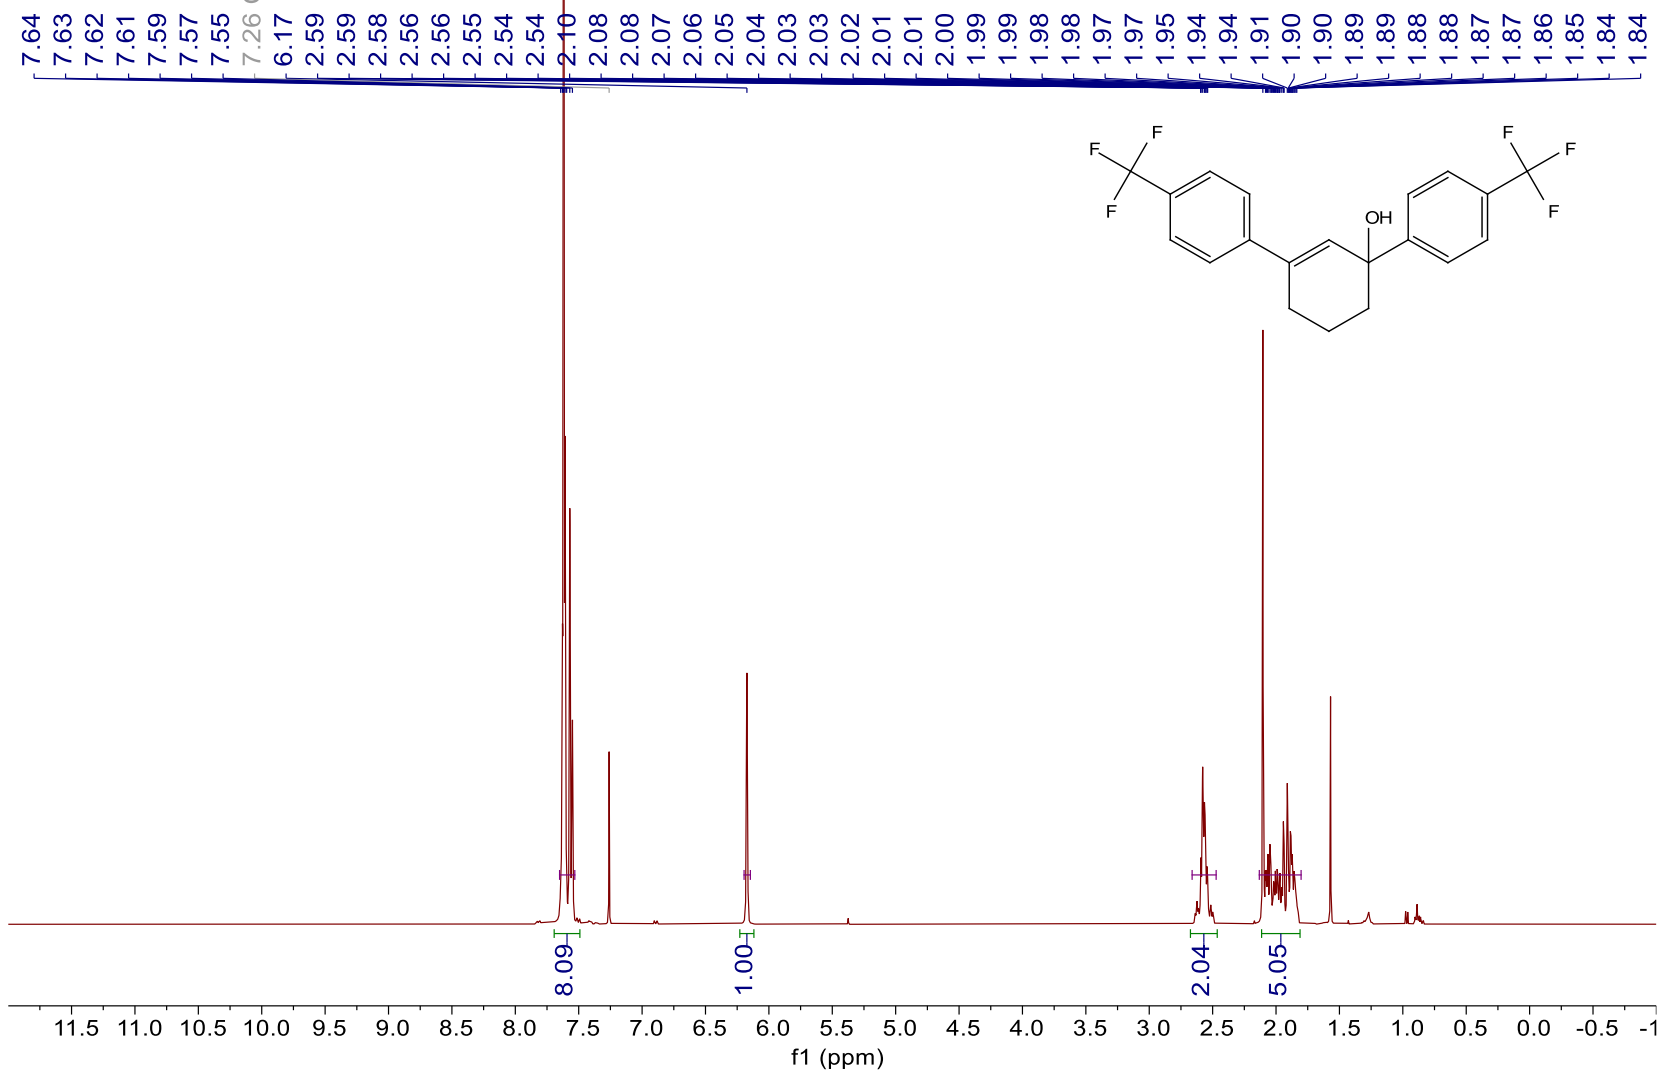

1a 4,4''-bis(trifluoromethyl)-5',6'-dihydro-[1,1':3',1''-terphenyl]-1'(4'H)-ol  
19F NMR at 376.48 MHz in CDCl3

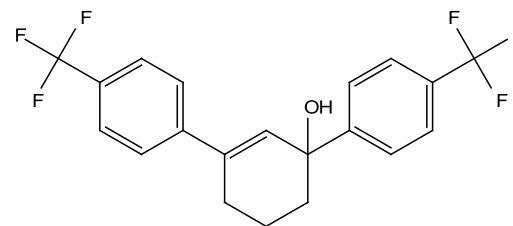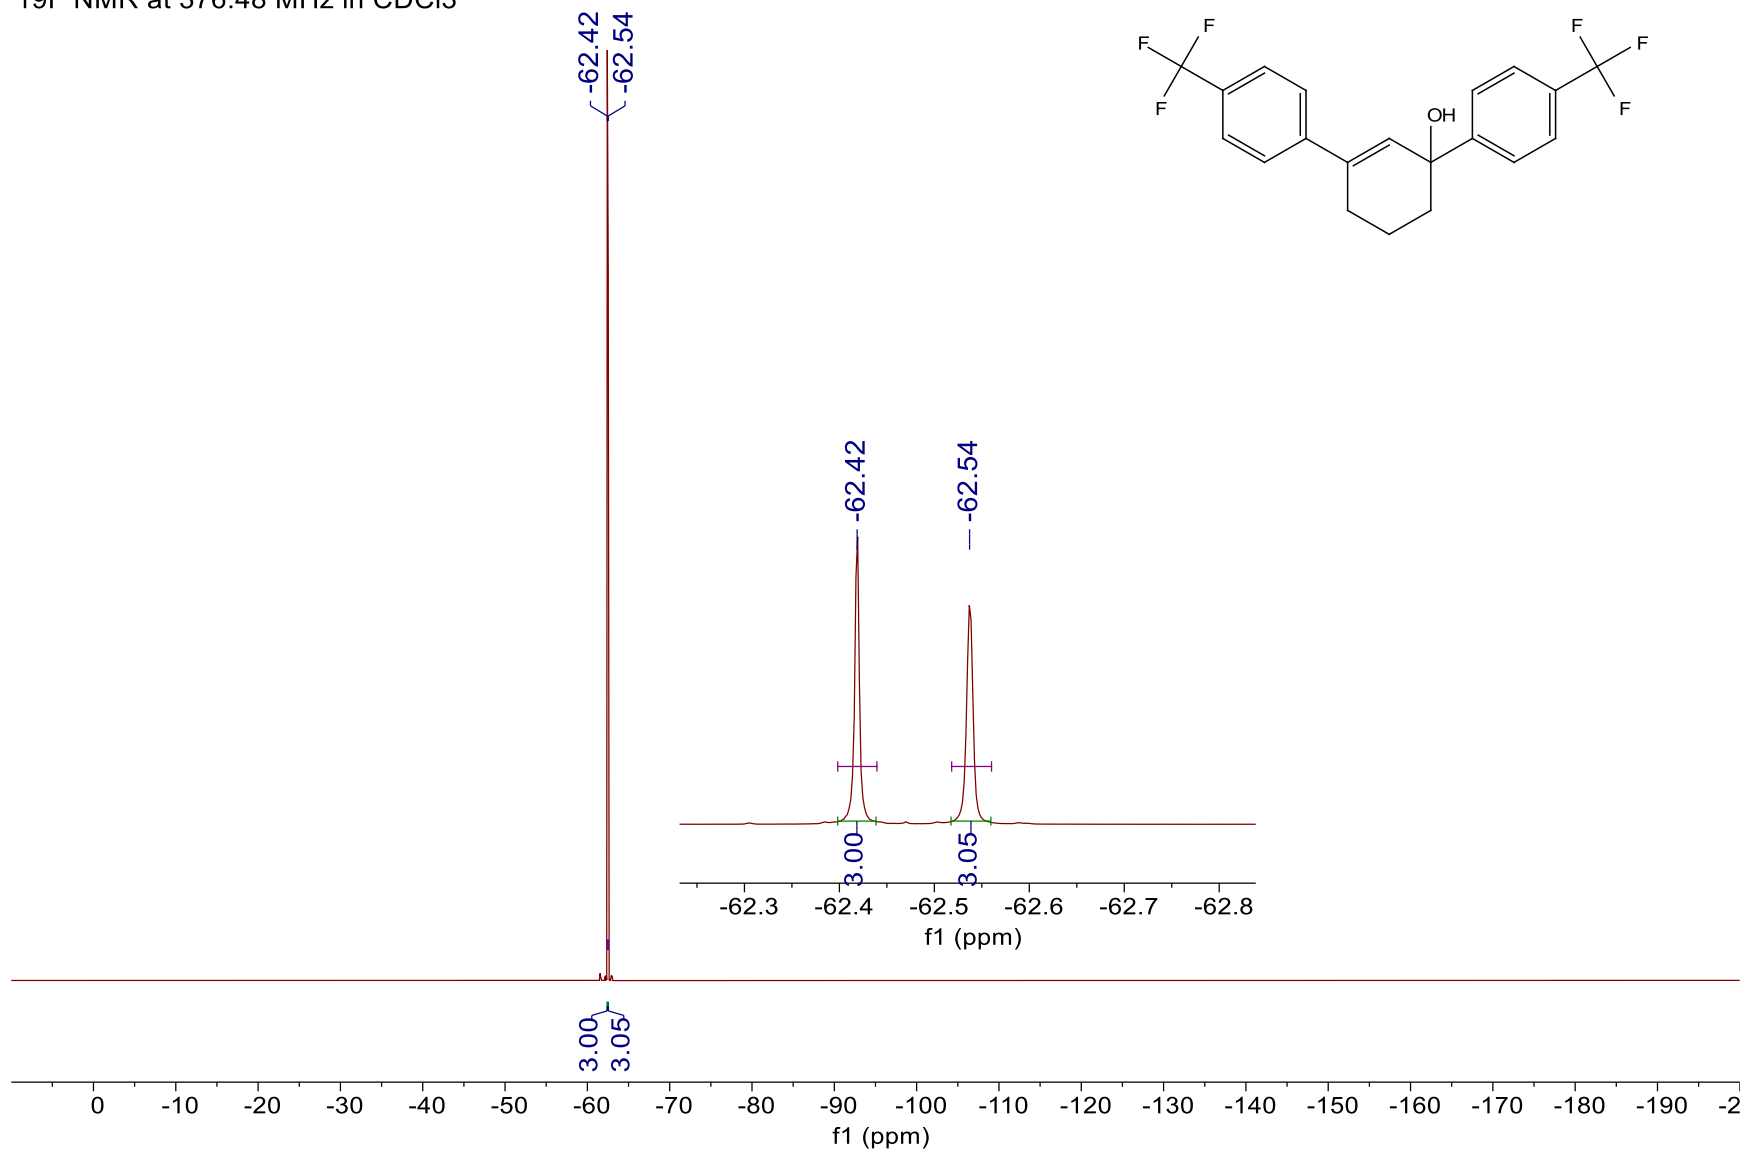

1a 4,4''-bis(trifluoromethyl)-5',6'-dihydro-[1,1':3',1''-terphenyl]-1'(4'H)-ol  
13C NMR at 100.63 MHz in CDCl3

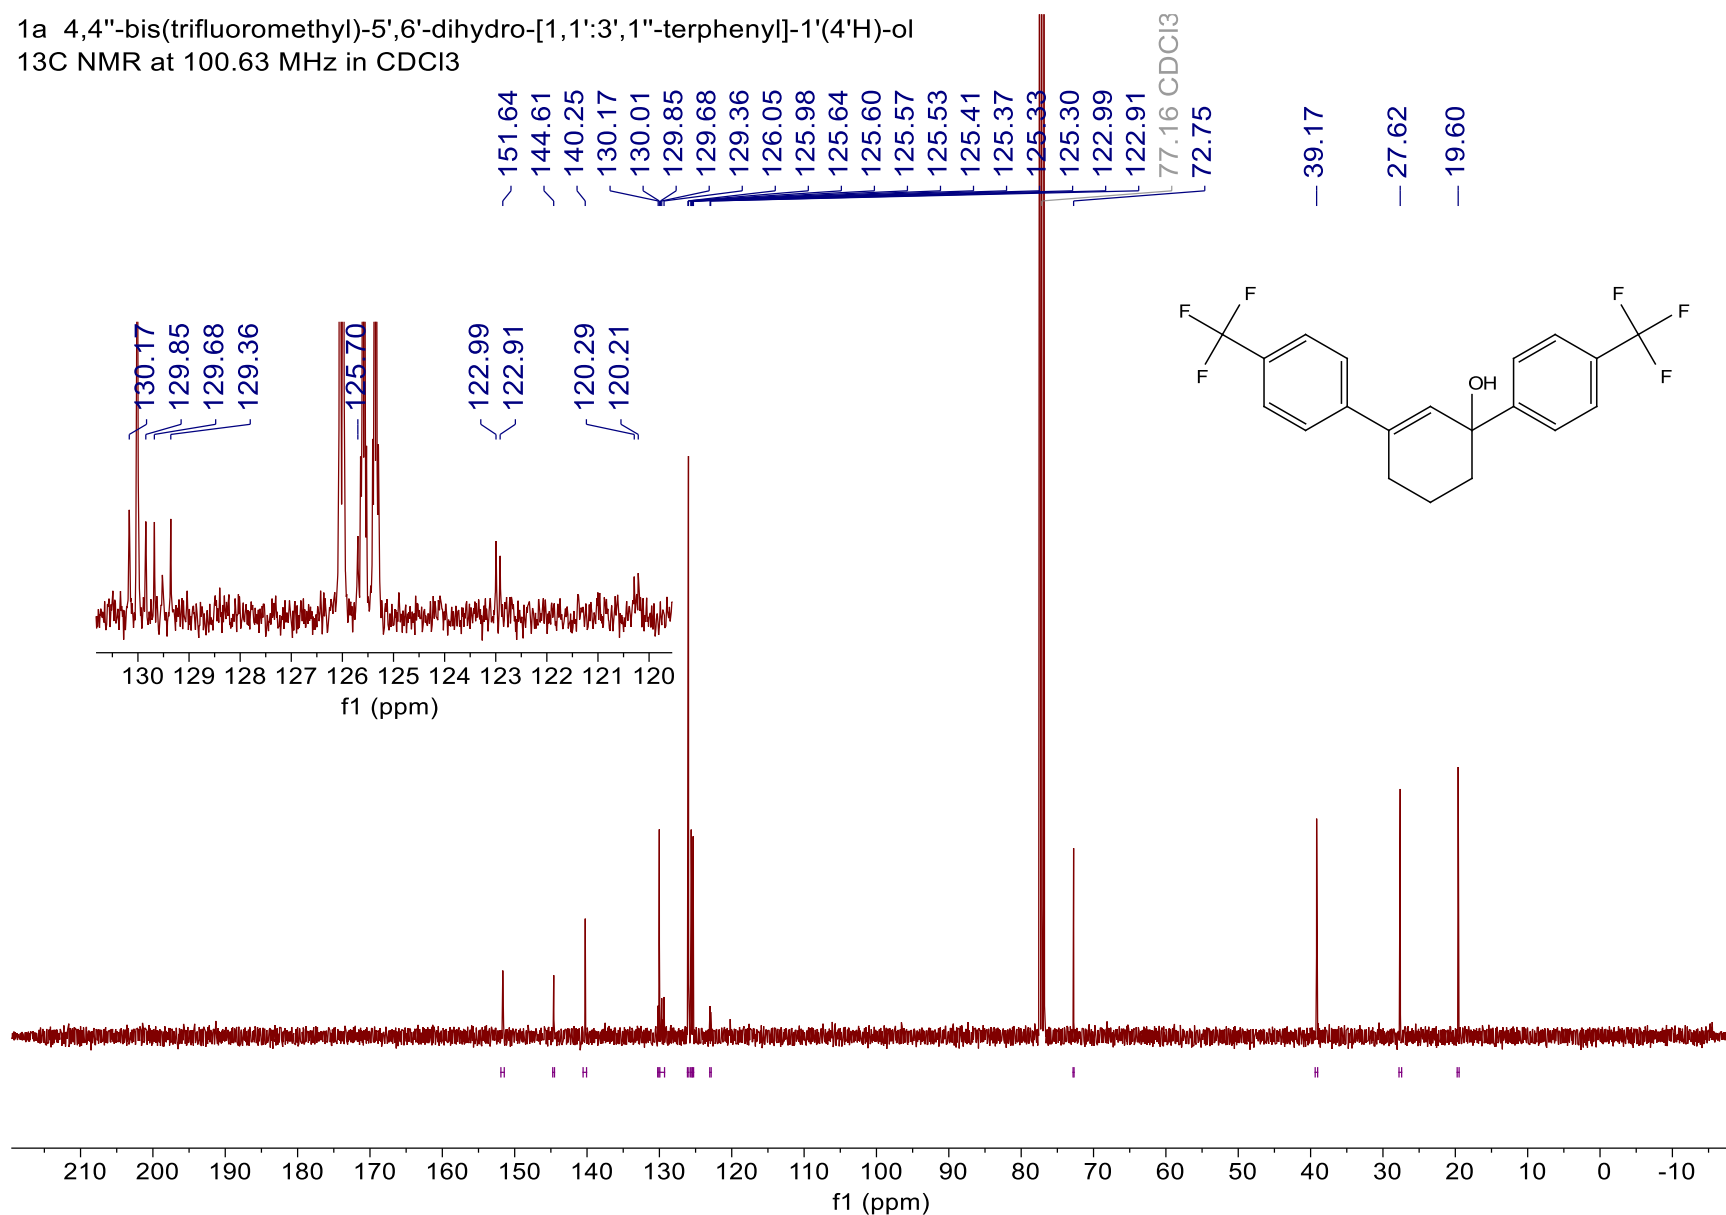

**1a 4,4''-bis(trifluoromethyl)-5',6'-dihydro-[1,1':3',1''-terphenyl]-1'(4'H)-ol**

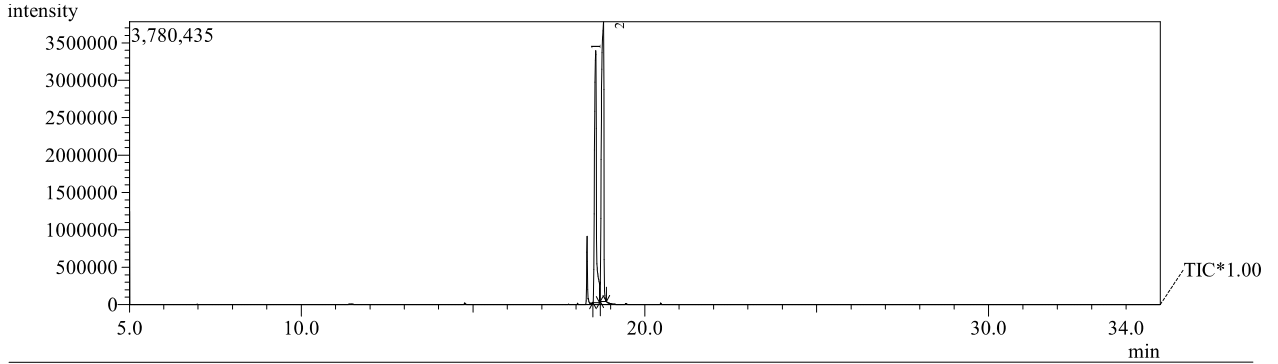

Line#:1 R.Time:18.6(Scan#:1629)  
MassPeaks:235  
RawMode:Averaged 18.6-18.6(1628-1630) BasePeak:368(612437)  
BG Mode:Calc. from Peak

M+  
(-H<sub>2</sub>O)

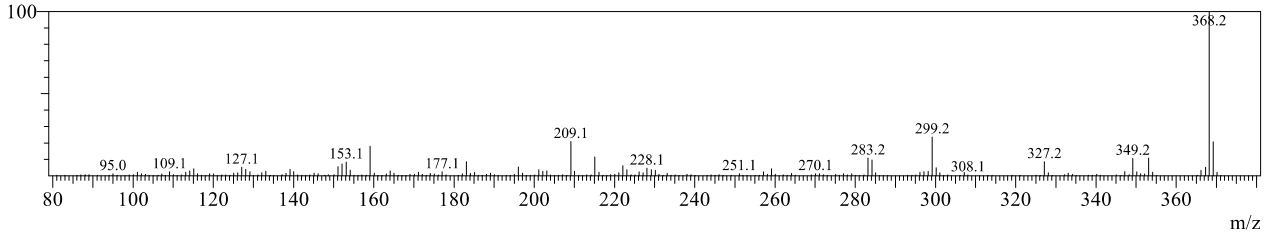

Line#:2 R.Time:18.8(Scan#:1657)  
MassPeaks:257  
RawMode:Averaged 18.8-18.8(1656-1658) BasePeak:289(199376)  
BG Mode:Calc. from Peak

M+

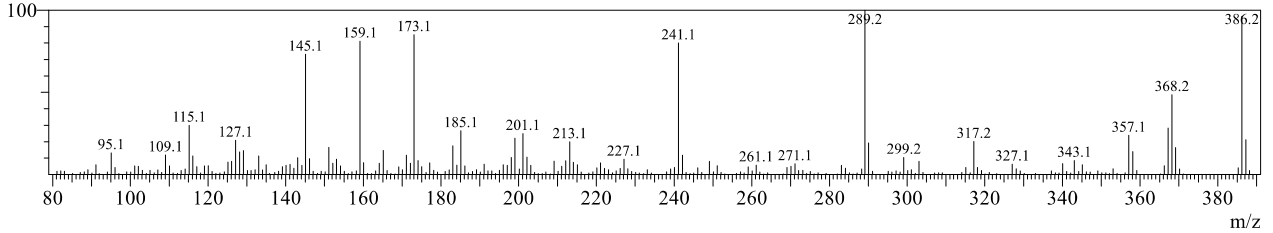

1b 4''-(trifluoromethyl)-5',6'-dihydro-[1,1':3,1''-terphenyl]-1'(4'H)-ol  
1H NMR at 400.15 MHz in CD<sub>2</sub>Cl<sub>2</sub>

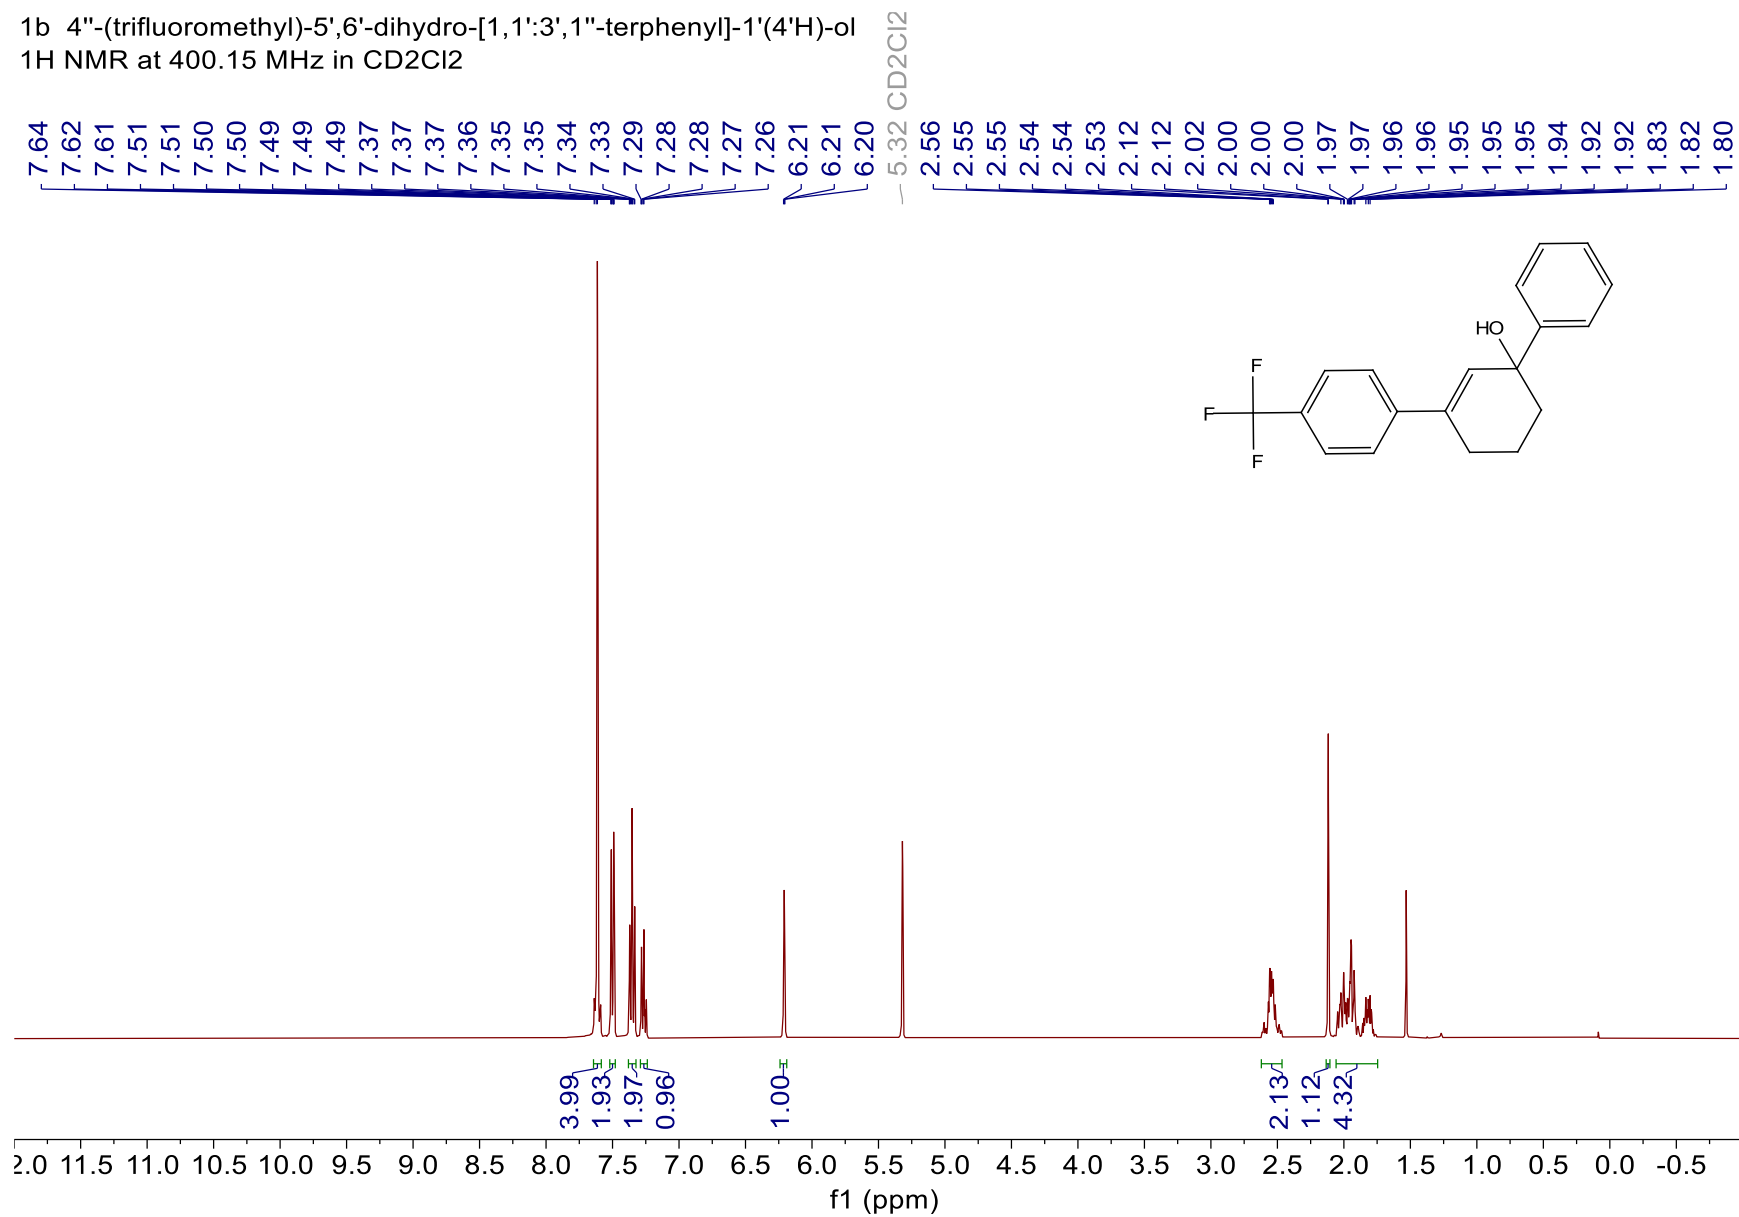

1b 4''-(trifluoromethyl)-5',6'-dihydro-[1,1':3',1''-terphenyl]-1'(4'H)-ol  
19F NMR at 376.48 MHz in CD2Cl2

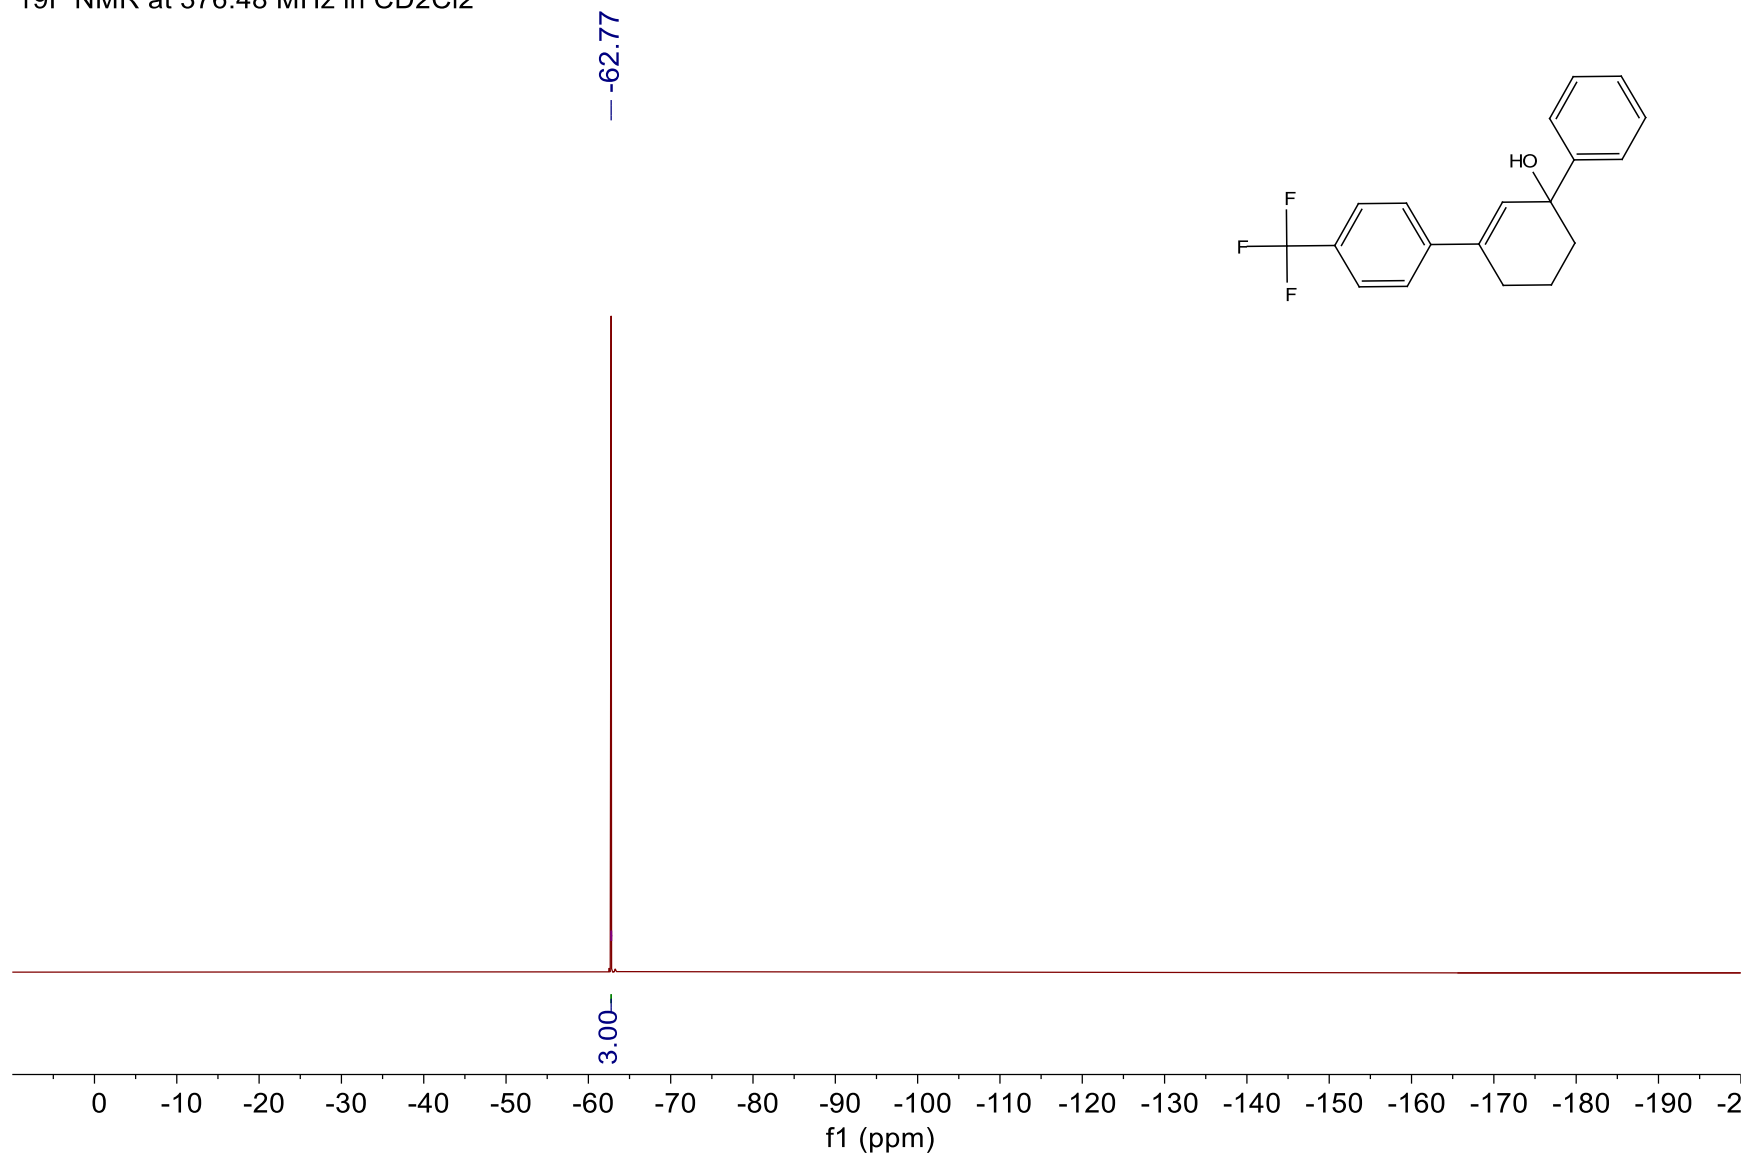



1b 4''-(trifluoromethyl)-5',6'-dihydro-[1,1':3',1''-terphenyl]-1'(4'H)-ol  
13C NMR at 100.63 MHz in CD2Cl2

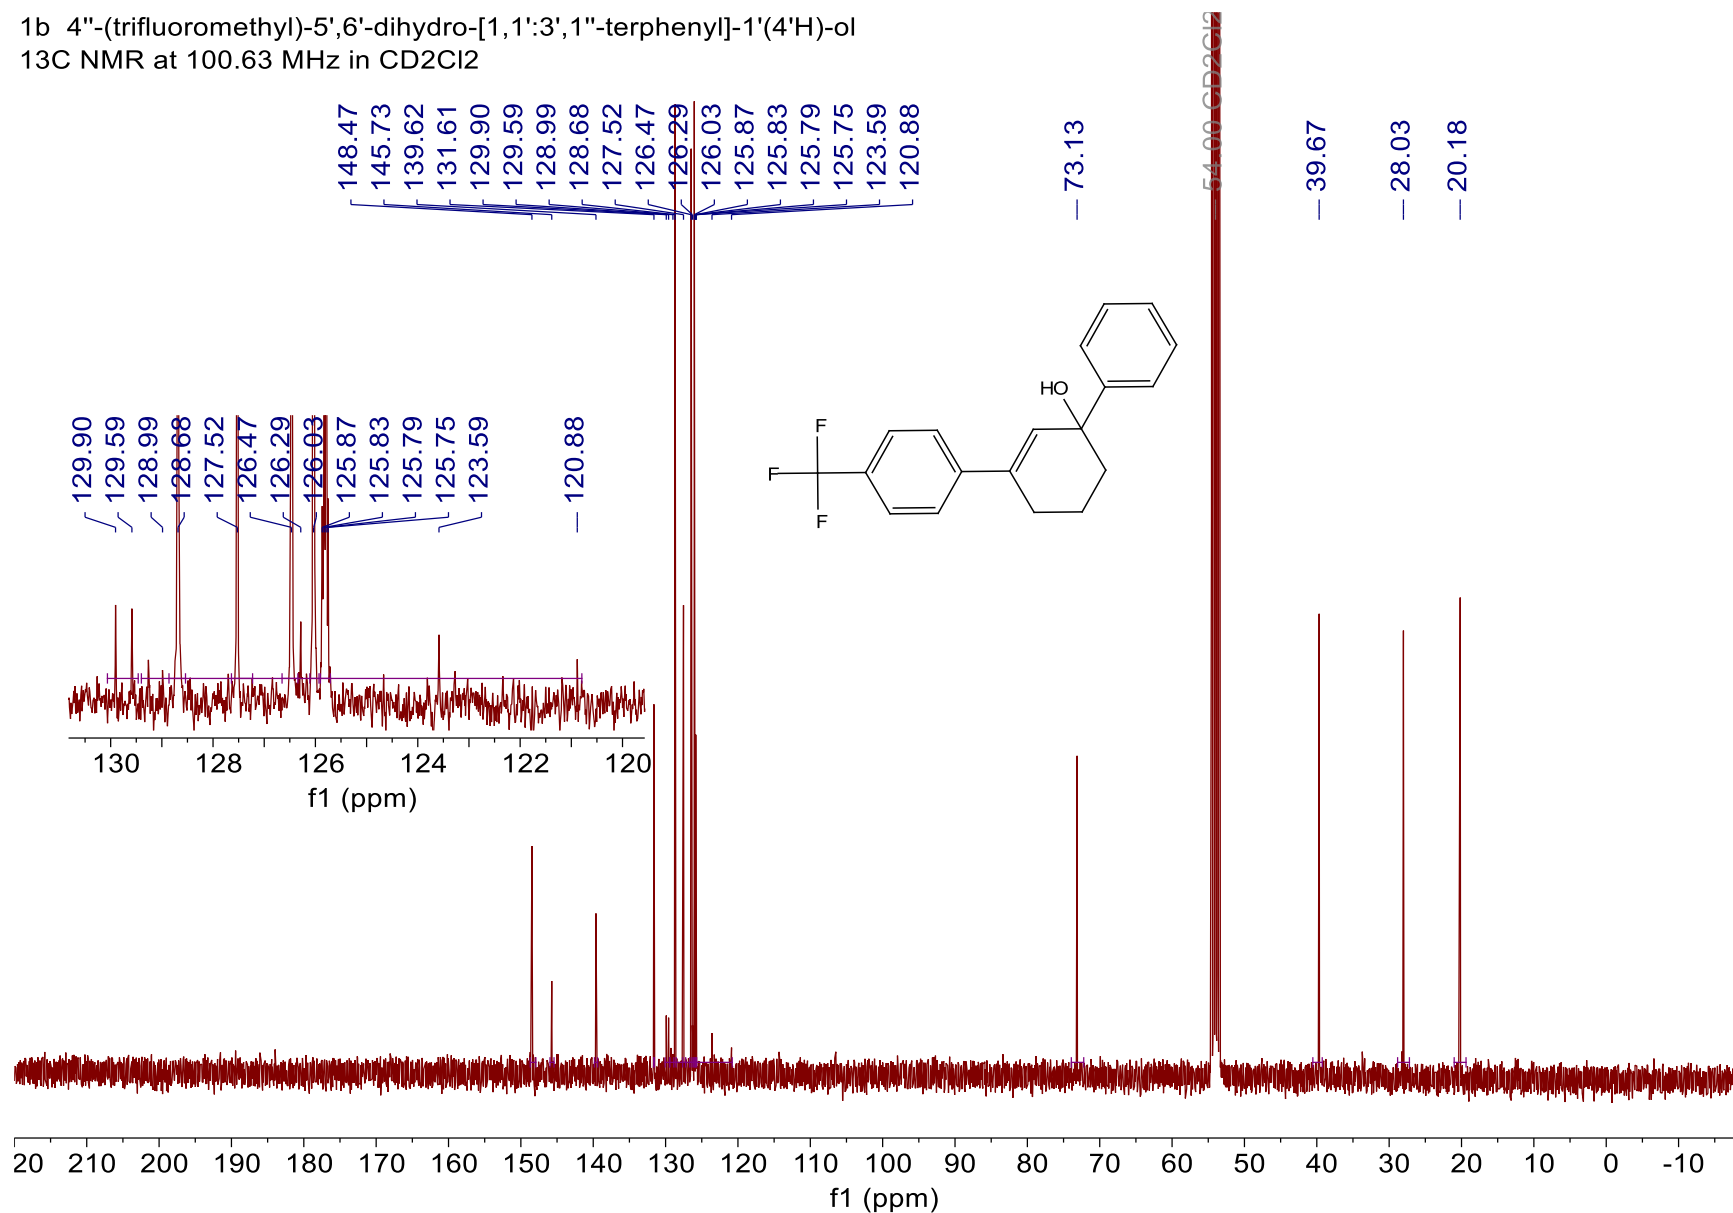

1c 4-(trifluoromethyl)-5',6'-dihydro-1,1':3,1''-terphenyl]-1'(4'H)-ol  
1H NMR at 400.15 MHz in CD2Cl2

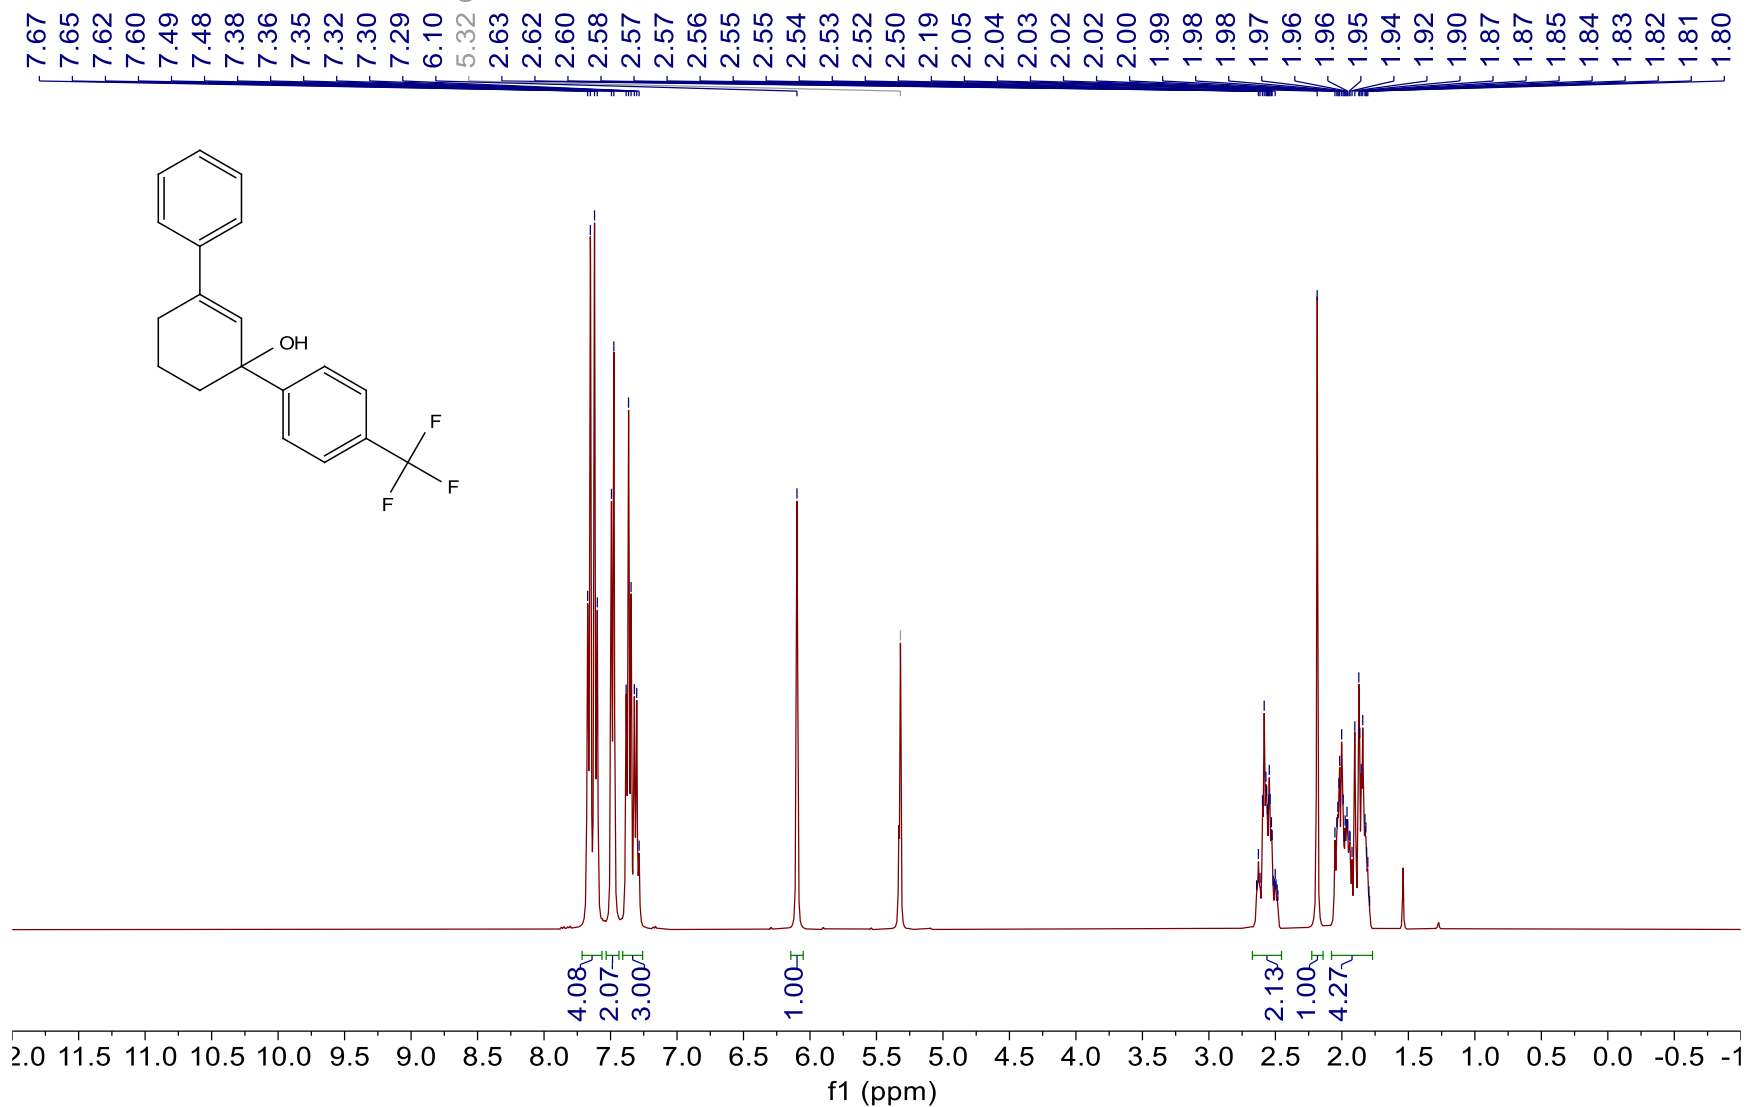

1c 4-(trifluoromethyl)-5',6'-dihydro-[1,1':3',1''-terphenyl]-1'(4'H)-ol  
19F NMR at 376.48 MHz in CD2Cl2

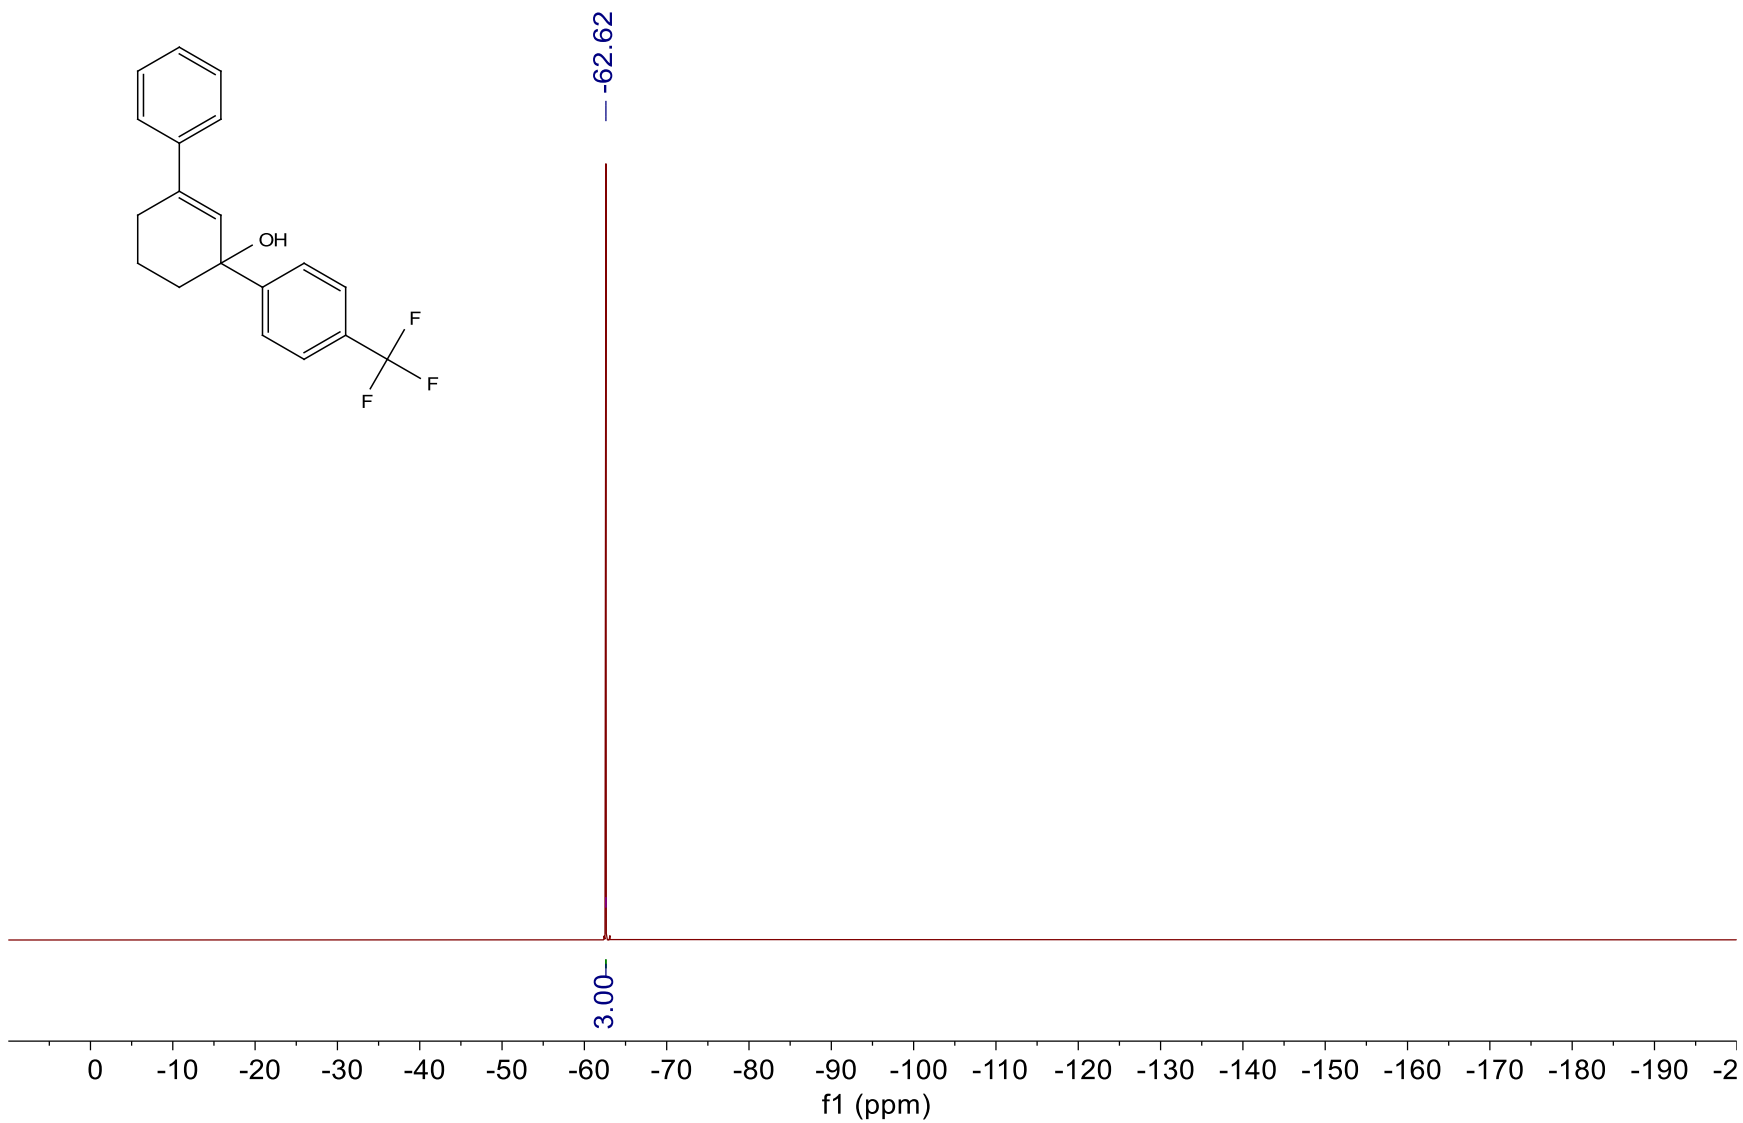

1c 4-(trifluoromethyl)-5',6'-dihydro-[1,1':3',1''-terphenyl]-1'(4'H)-ol  
13C NMR at 100.63 MHz in CD<sub>2</sub>Cl<sub>2</sub>

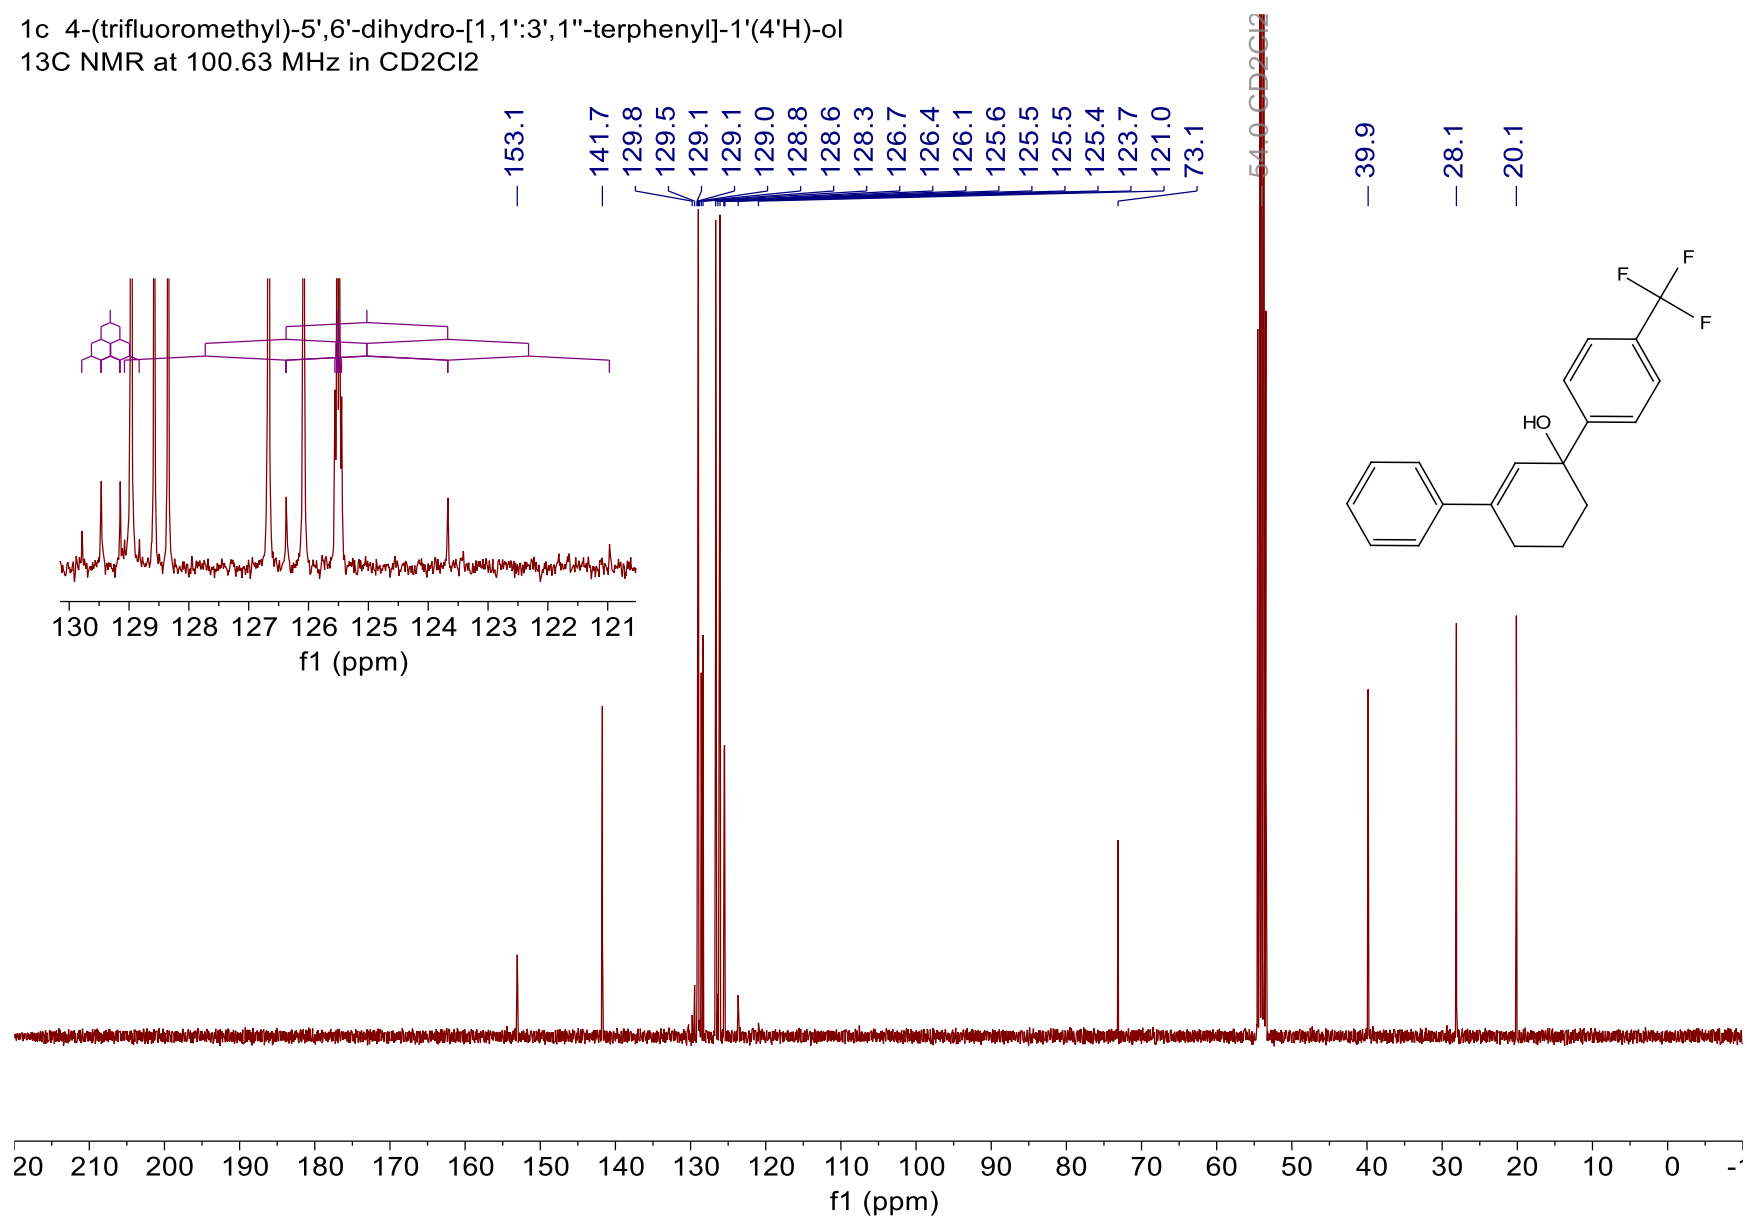

**1c 4-(trifluoromethyl)-5',6'-dihydro-[1,1':3',1''-terphenyl]-1'(4'H)-ol**

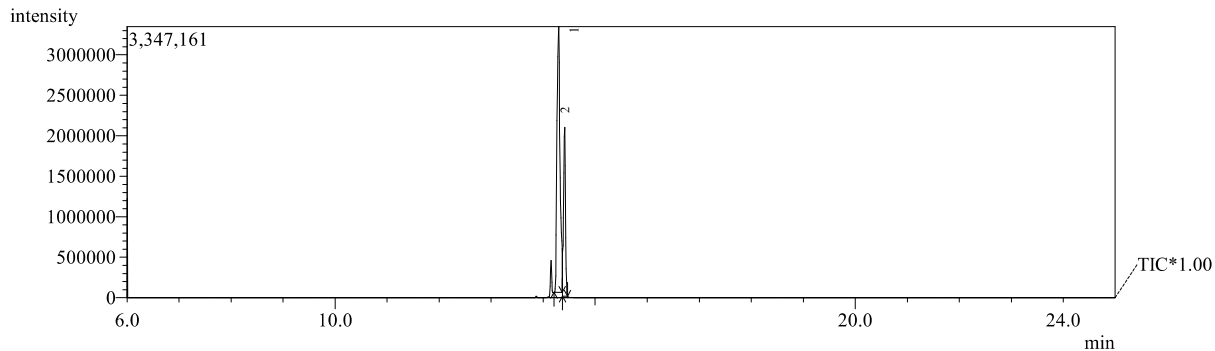

Spectrum

Line#:1 R.Time:14.3(Scan#:997)  
MassPeaks:171  
RawMode:Averaged 14.3-14.3(996-998) BasePeak:300(542882)  
BG Mode:Calc. from Peak

M+  
(-H<sub>2</sub>O)

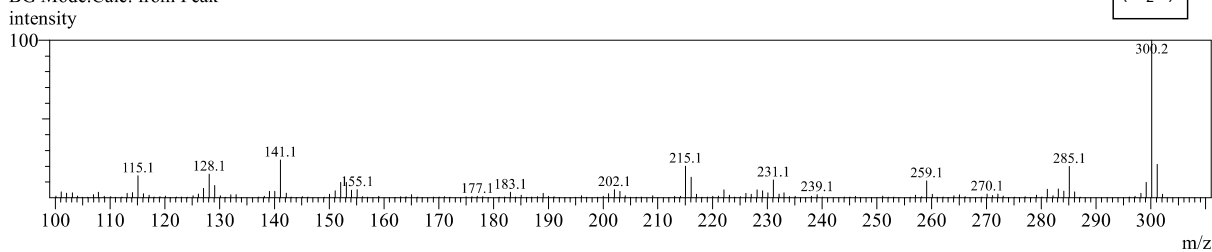

Line#:2 R.Time:14.4(Scan#:1011)  
MassPeaks:176  
RawMode:Averaged 14.4-14.4(1010-1012) BasePeak:318(99716)  
BG Mode:Calc. from Peak

M+

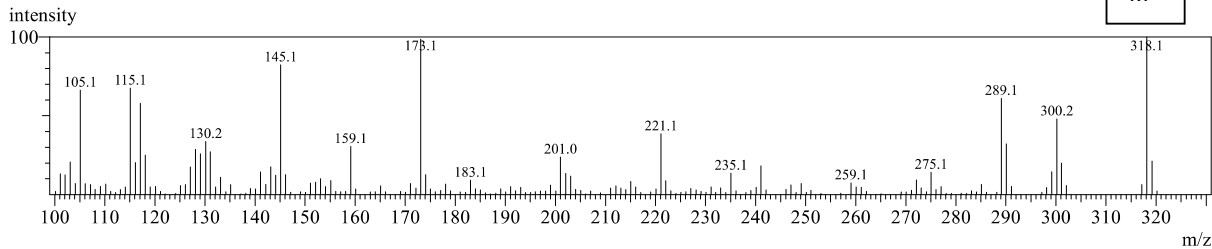

1d 5,6'-dihydro-[1,1':3,1''-terphenyl]-1'(4'H)-ol  
1H NMR at 400.15 MHz in CDCl3

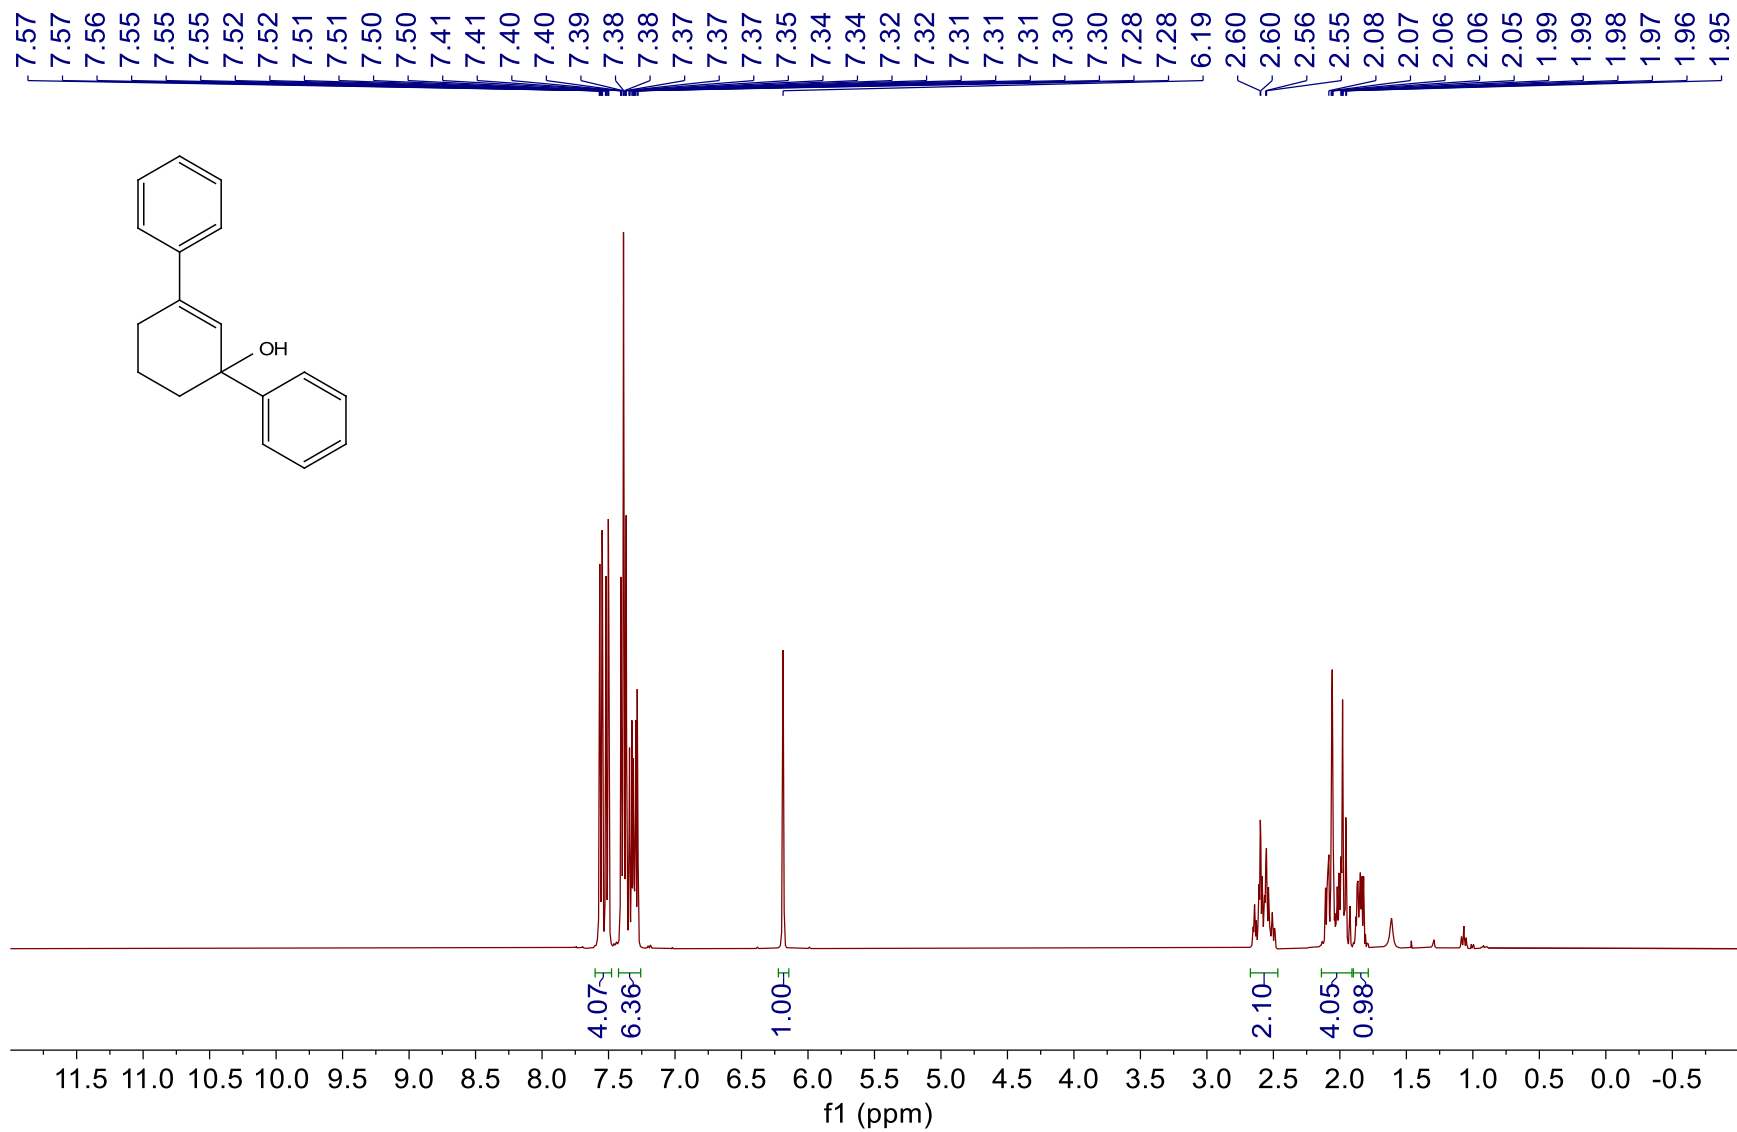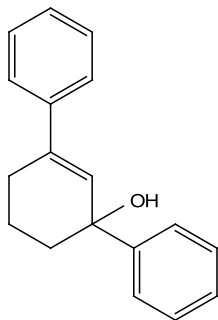

1d 5,6'-dihydro-[1,1':3',1''-terphenyl]-1'(4'H)-ol  
13C NMR at 100.63 MHz in CDCl3

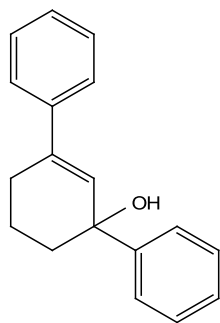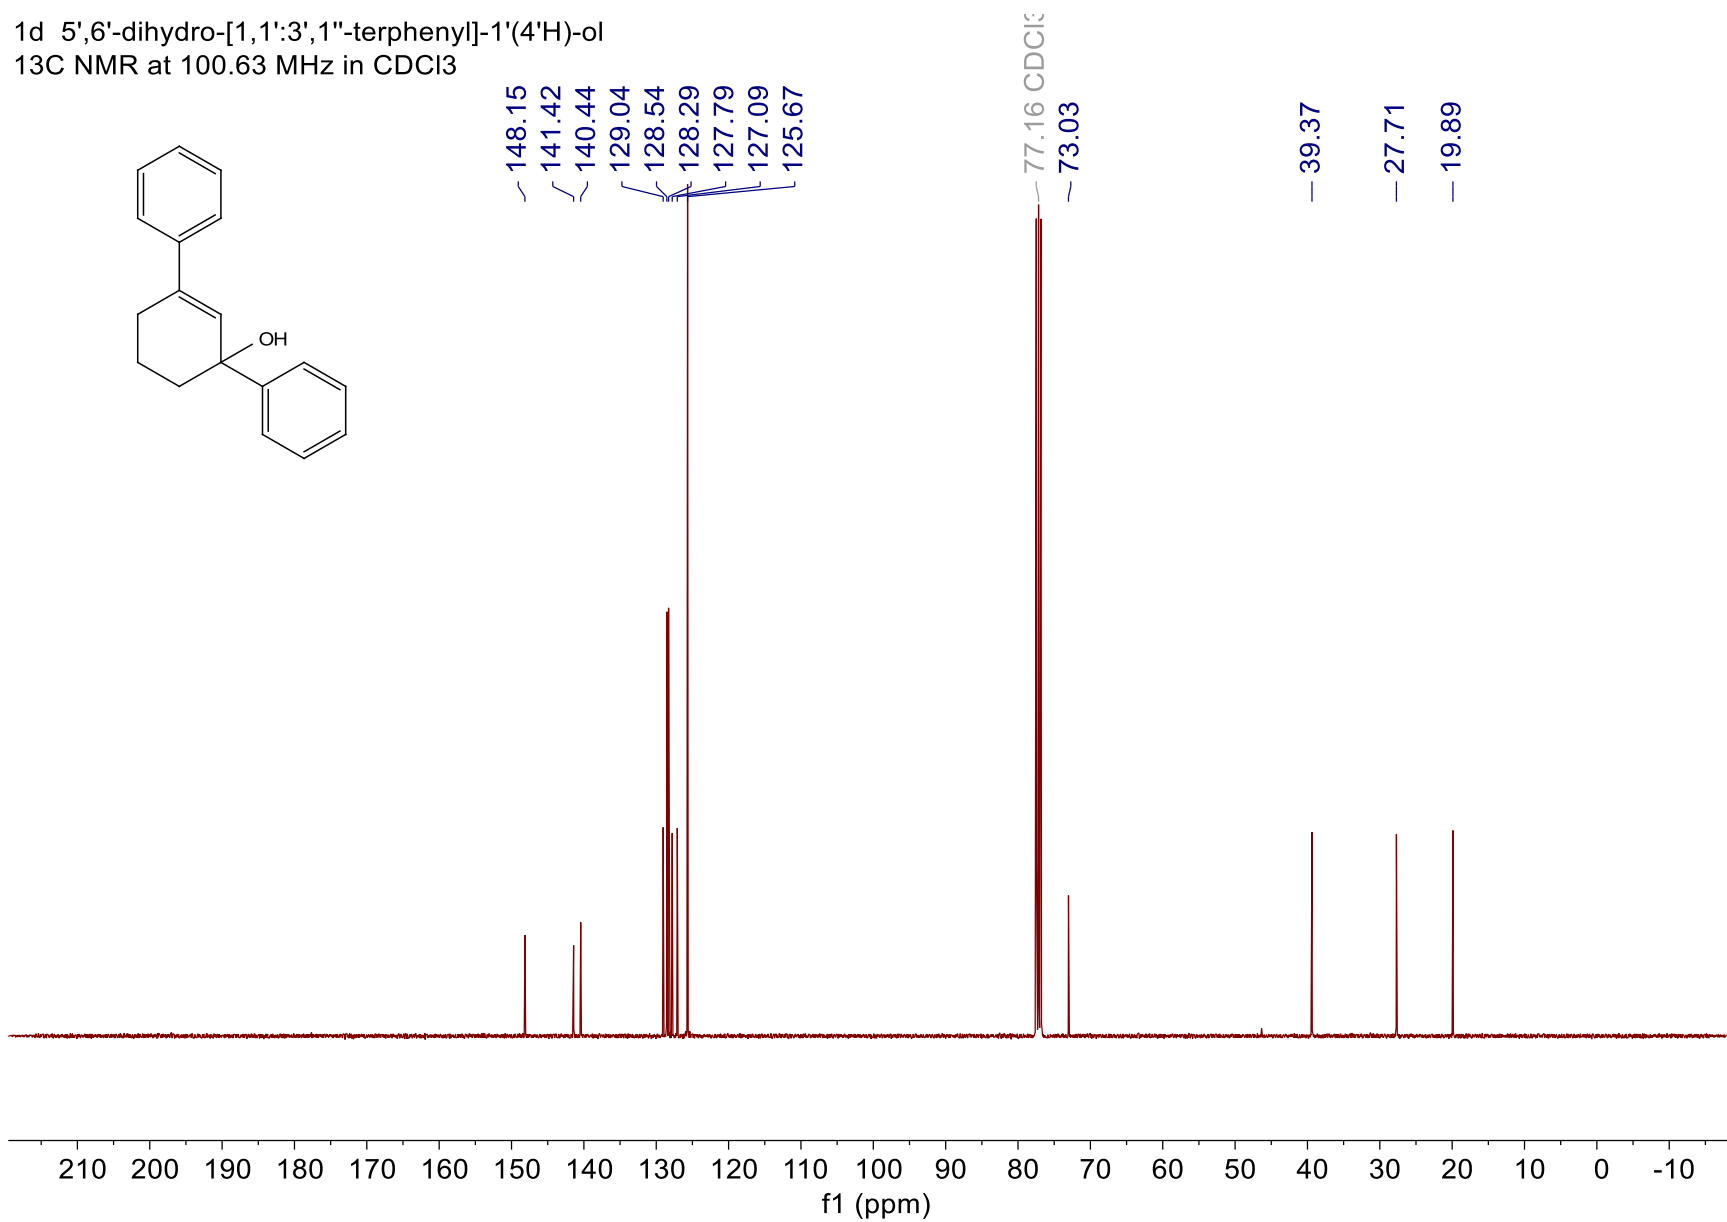

1e 3-methyl-3,4,5,6-tetrahydro-[1,1'-biphenyl]-3-ol  
1H NMR at 400.15 MHz in CD<sub>2</sub>Cl<sub>2</sub>

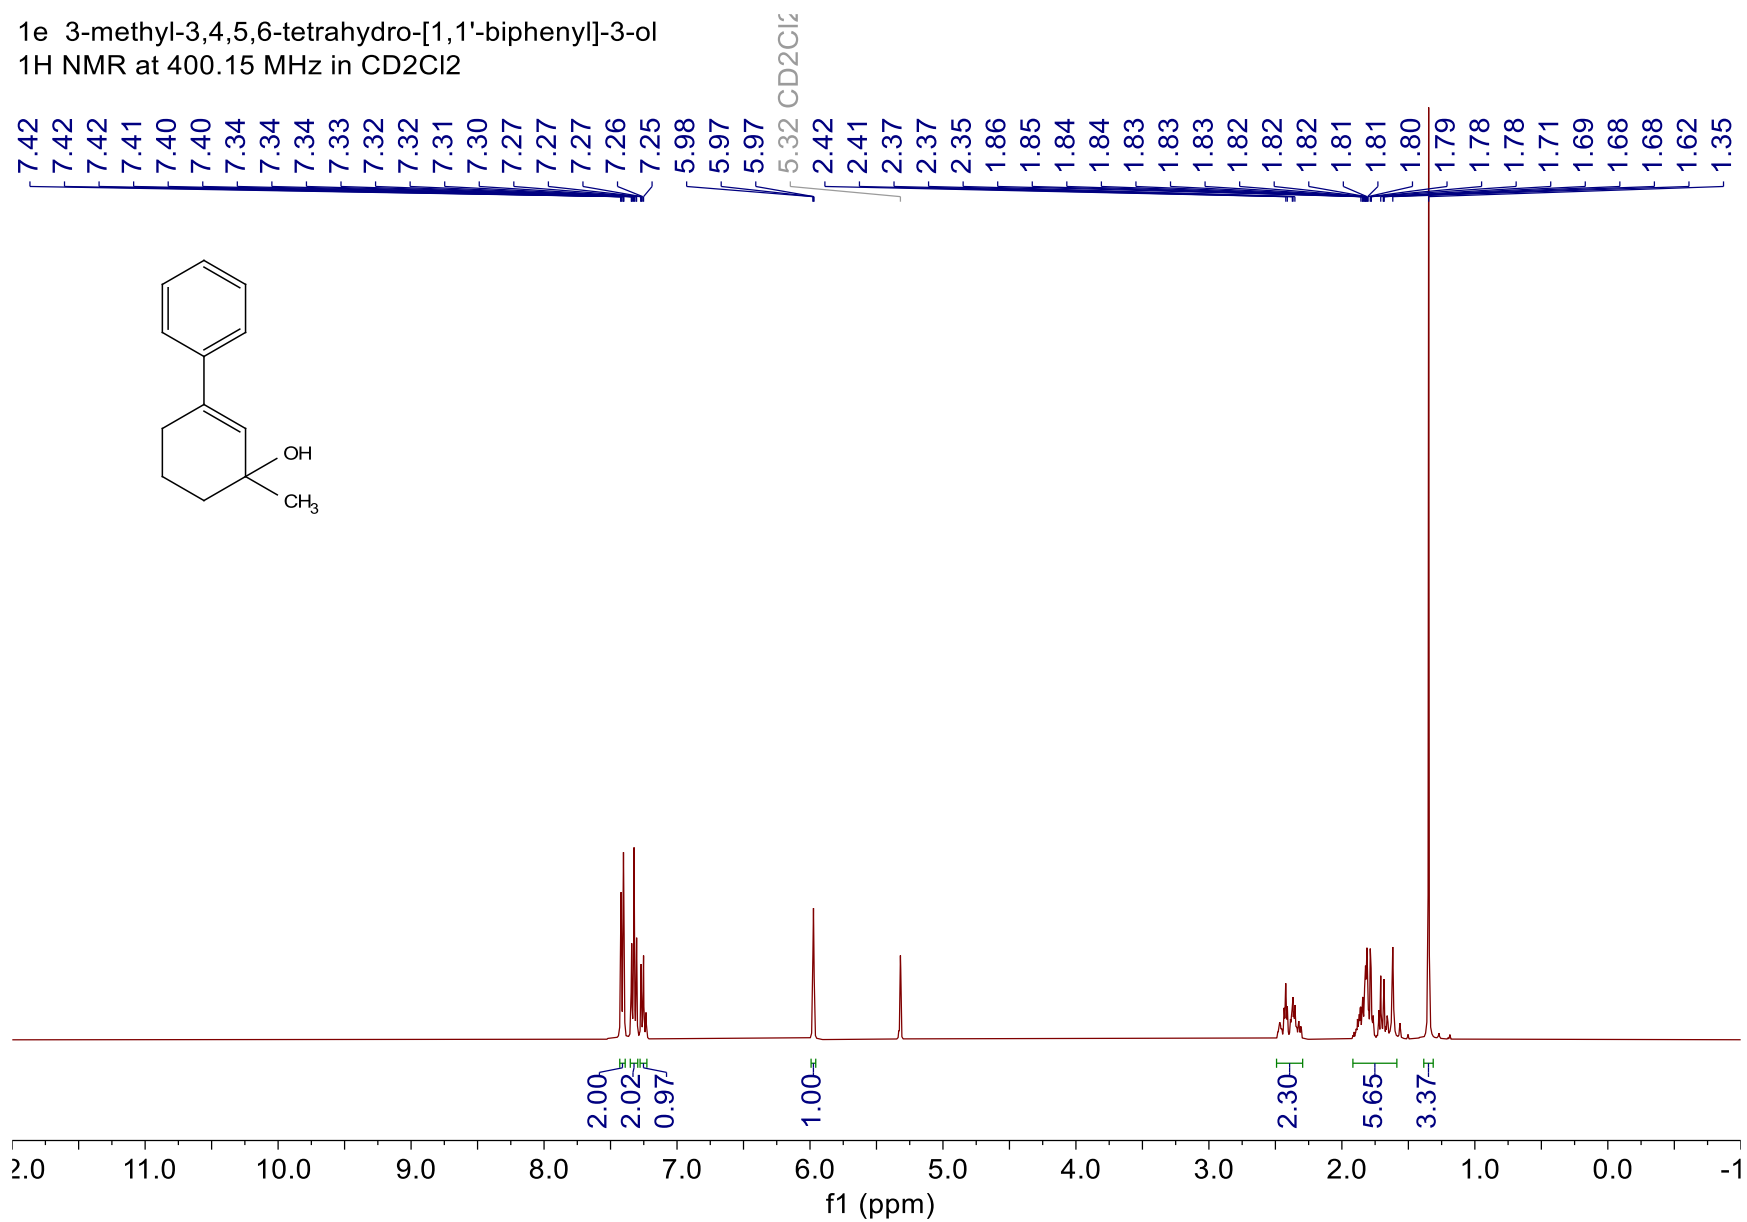



1e 3-methyl-3,4,5,6-tetrahydro-[1,1'-biphenyl]-3-ol  
13C NMR at 100.63 MHz in CD2Cl2

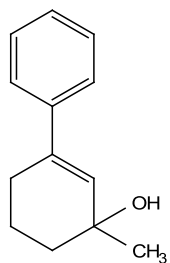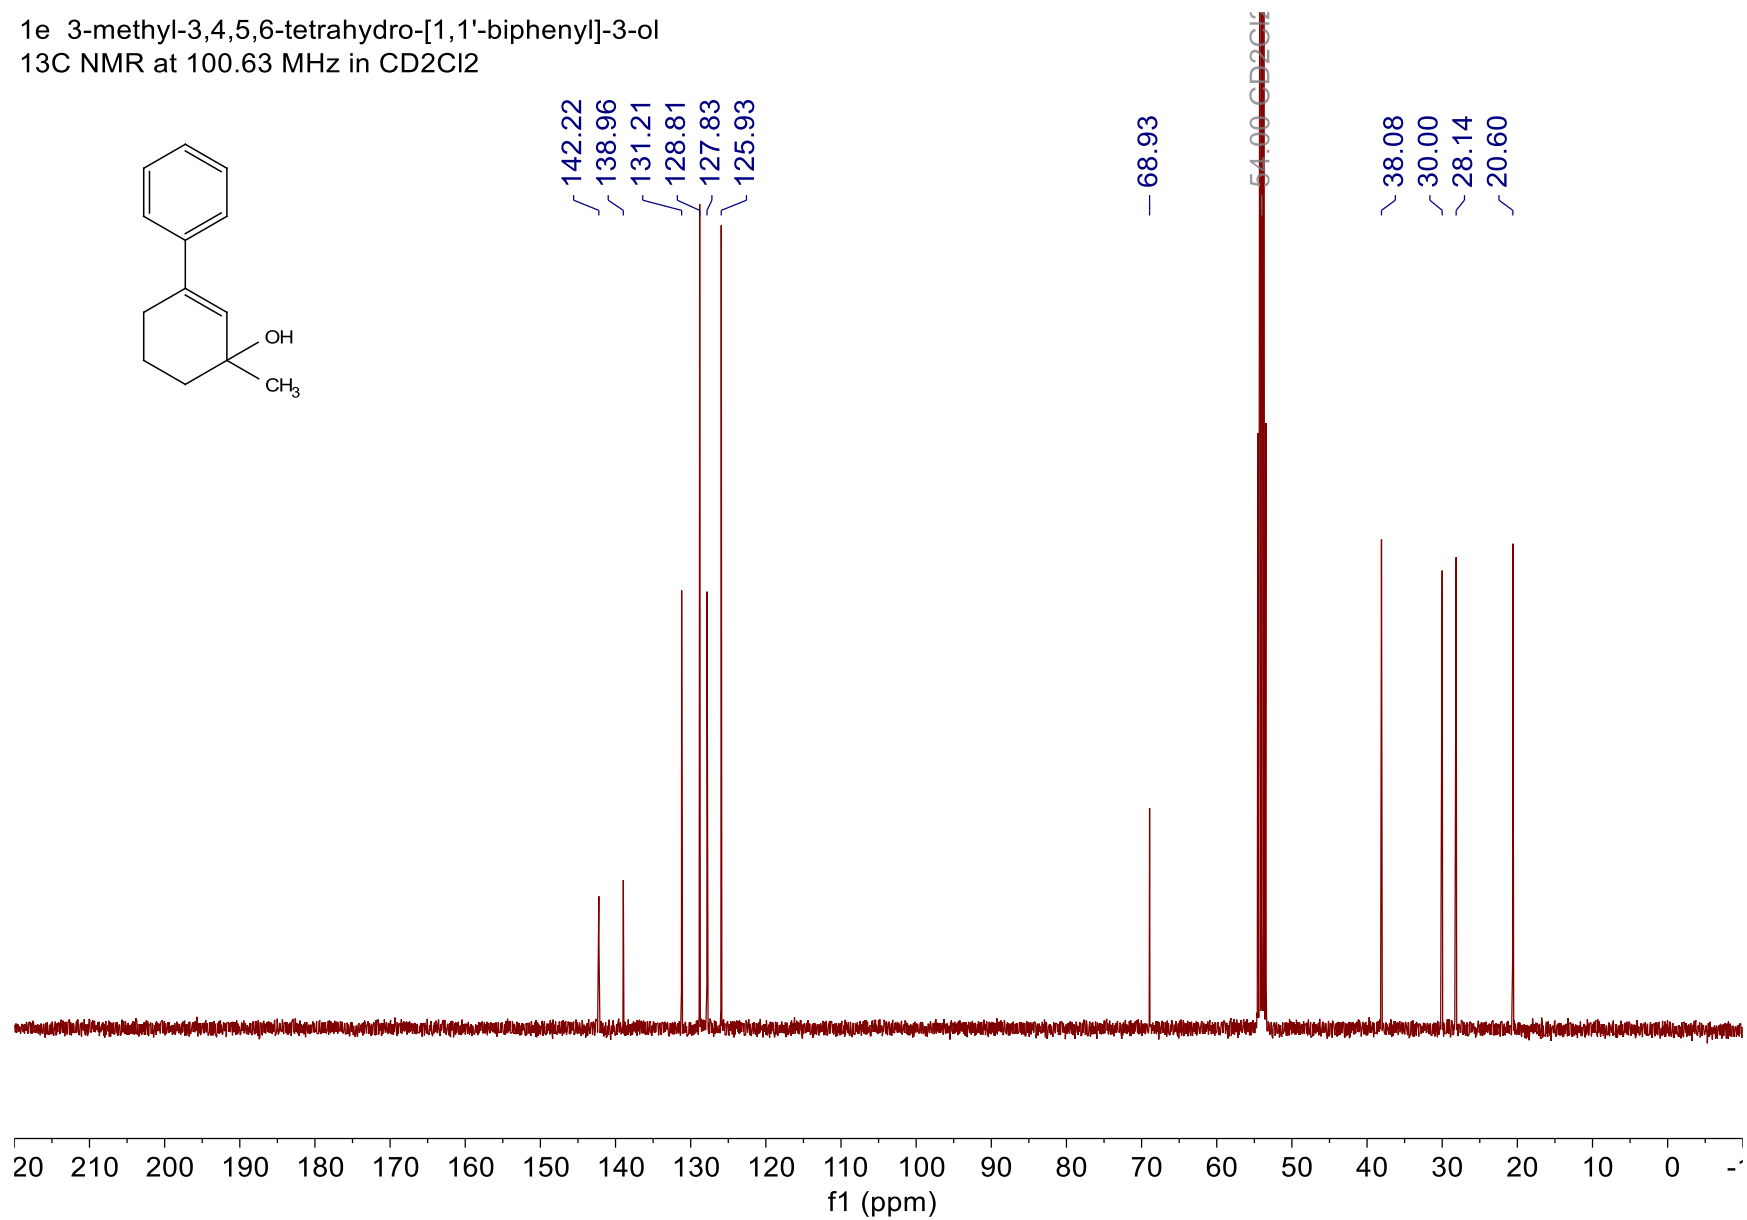

1f 3-allyl-4'-(trifluoromethyl)-3,4,5,6-tetrahydro-[1,1'-biphenyl]-3-ol  
1H NMR at 400.15 MHz in CDCl3

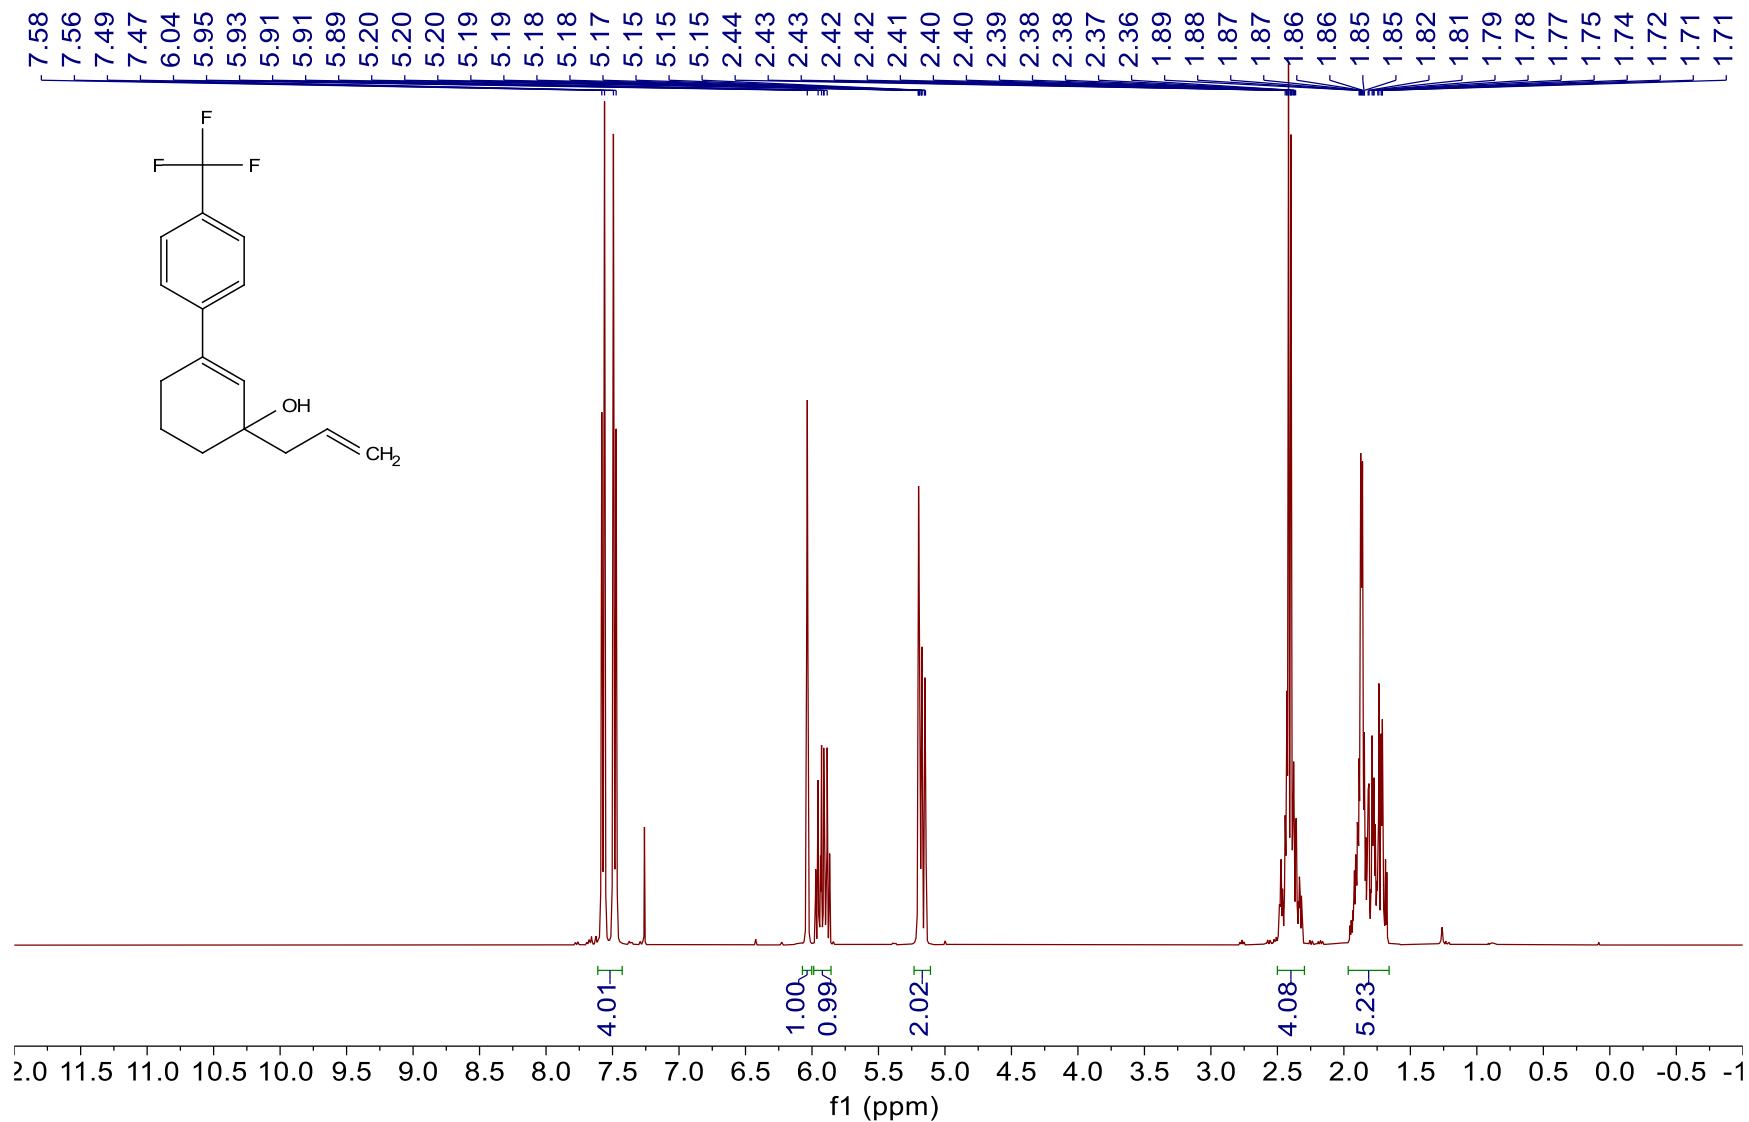

1f 3-allyl-4'-(trifluoromethyl)-3,4,5,6-tetrahydro-[1,1'-biphenyl]-3-ol  
19F NMR at 376.48 MHz in CDCl3

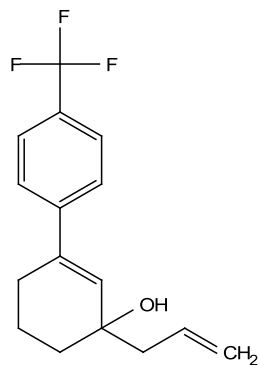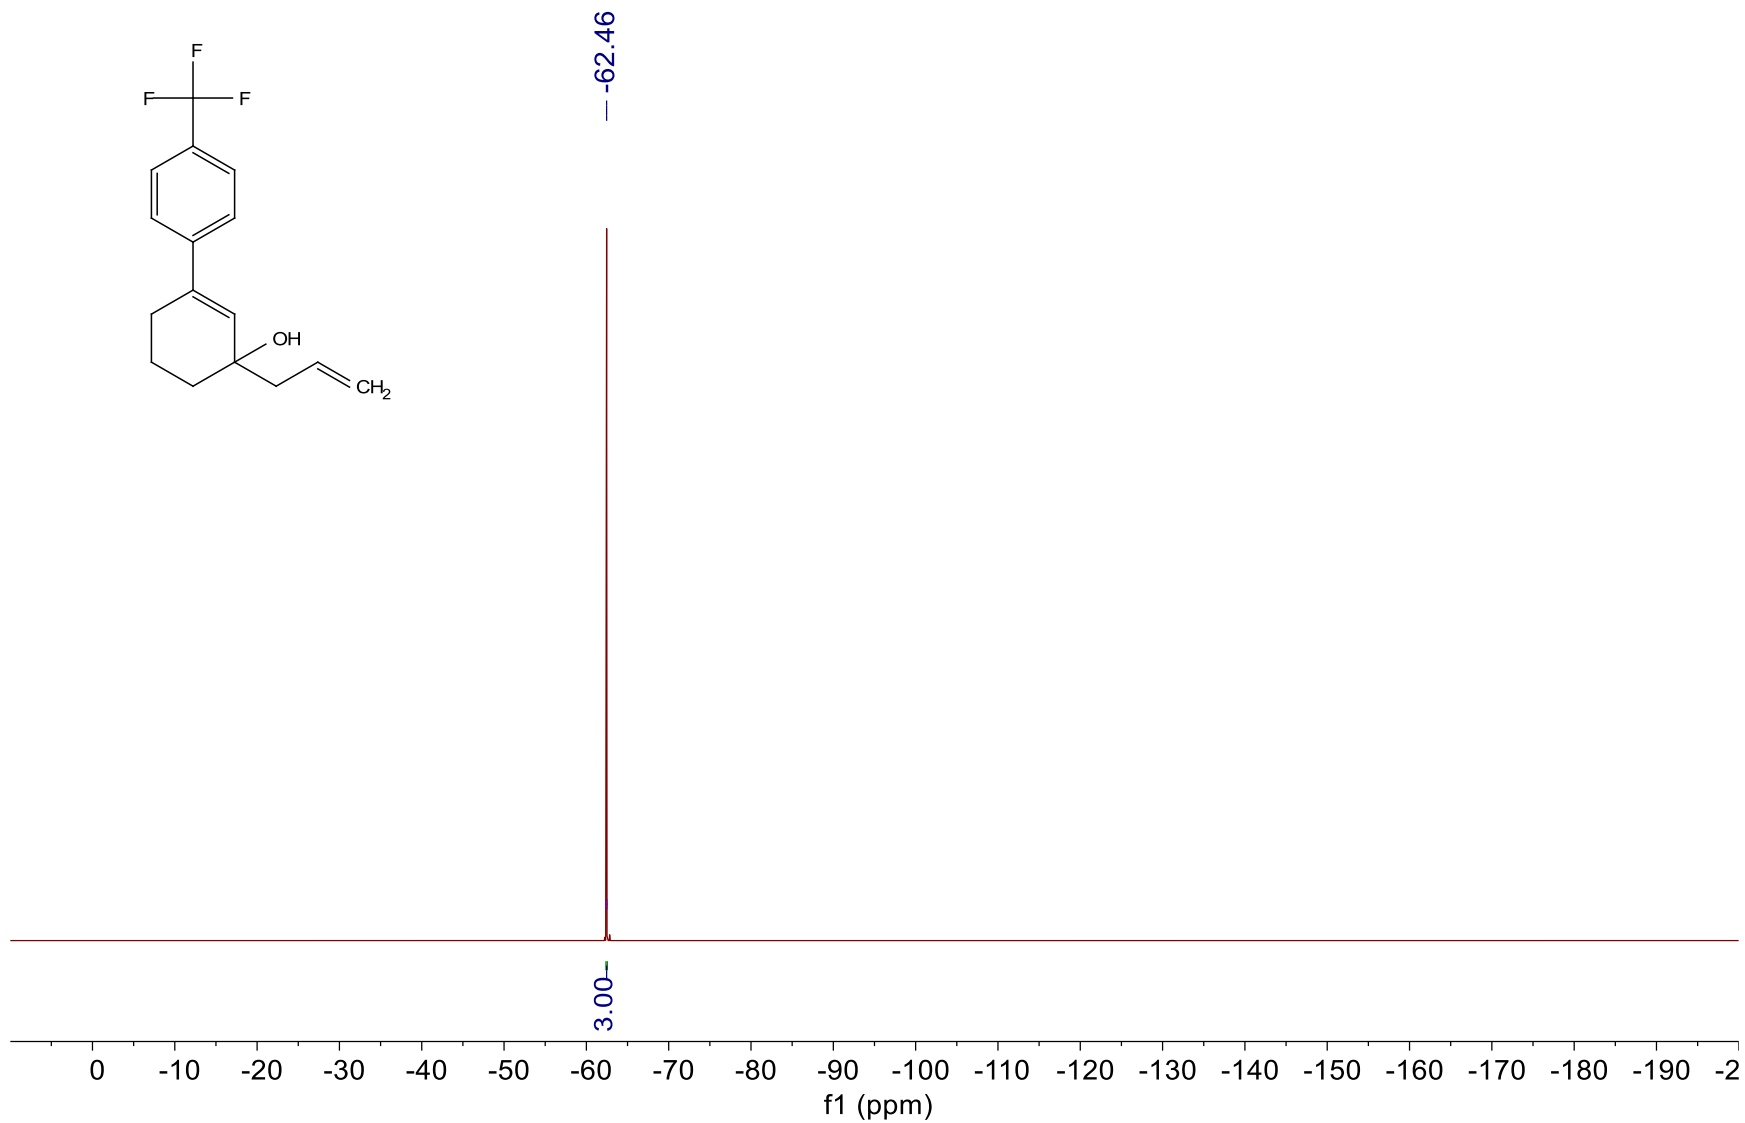

1f 3-allyl-4'-(trifluoromethyl)-3,4,5,6-tetrahydro-[1,1'-biphenyl]-3-ol  
13C NMR at 100.63 MHz in CDCl3

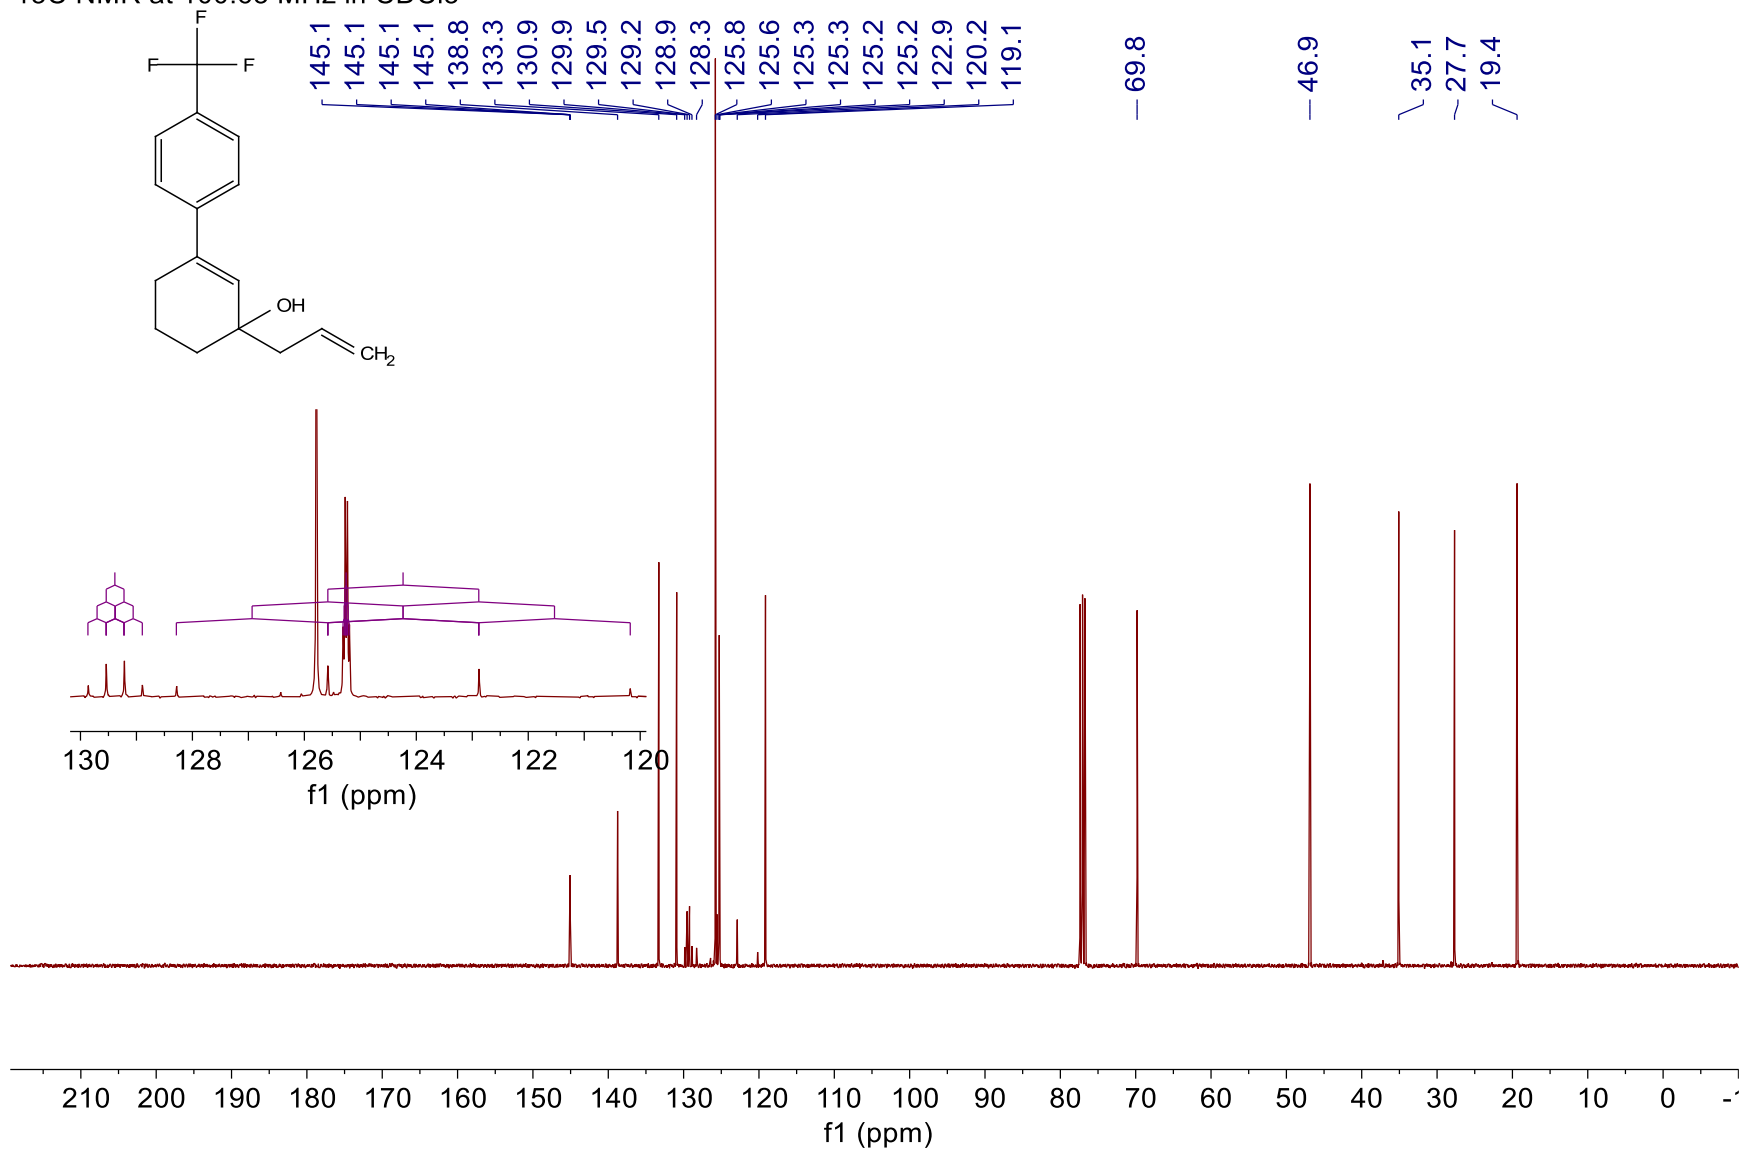

1g 3-(3-(dimethylamino)prop-1-yn-1-yl)-4'-(trifluoromethyl)-3,4,5,6-tetrahydro-[1,1'-biphenyl]-3-ol  
1H NMR at 400.15 MHz in CD2Cl2

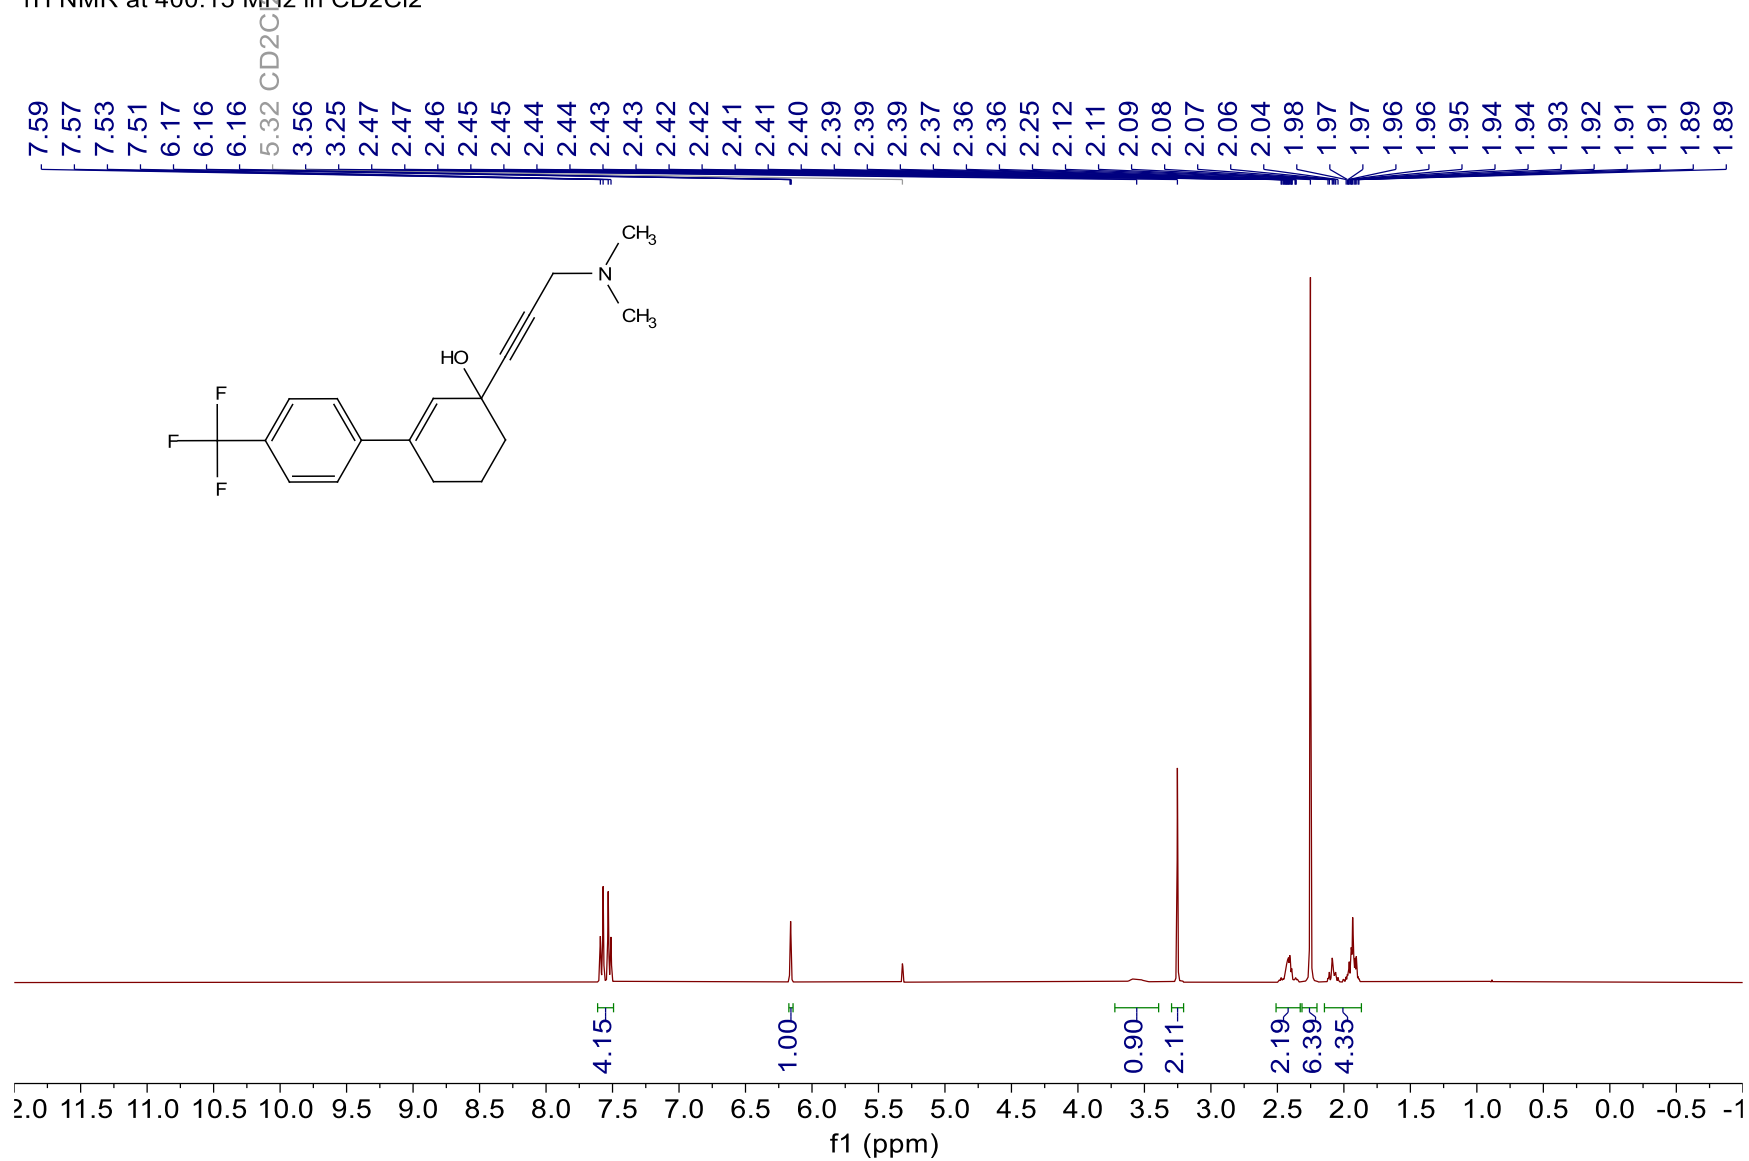

1g 3-(3-(dimethylamino)prop-1-yn-1-yl)-4'-(trifluoromethyl)-3,4,5,6-tetrahydro-[1,1'-biphenyl]-3-ol  
19F NMR at 376.48 MHz in CD<sub>2</sub>Cl<sub>2</sub>

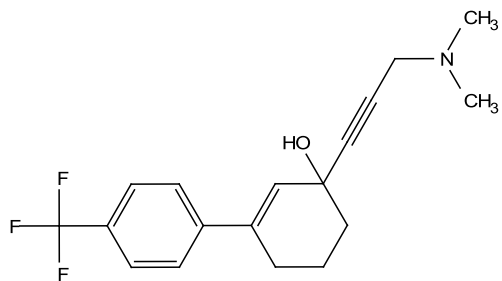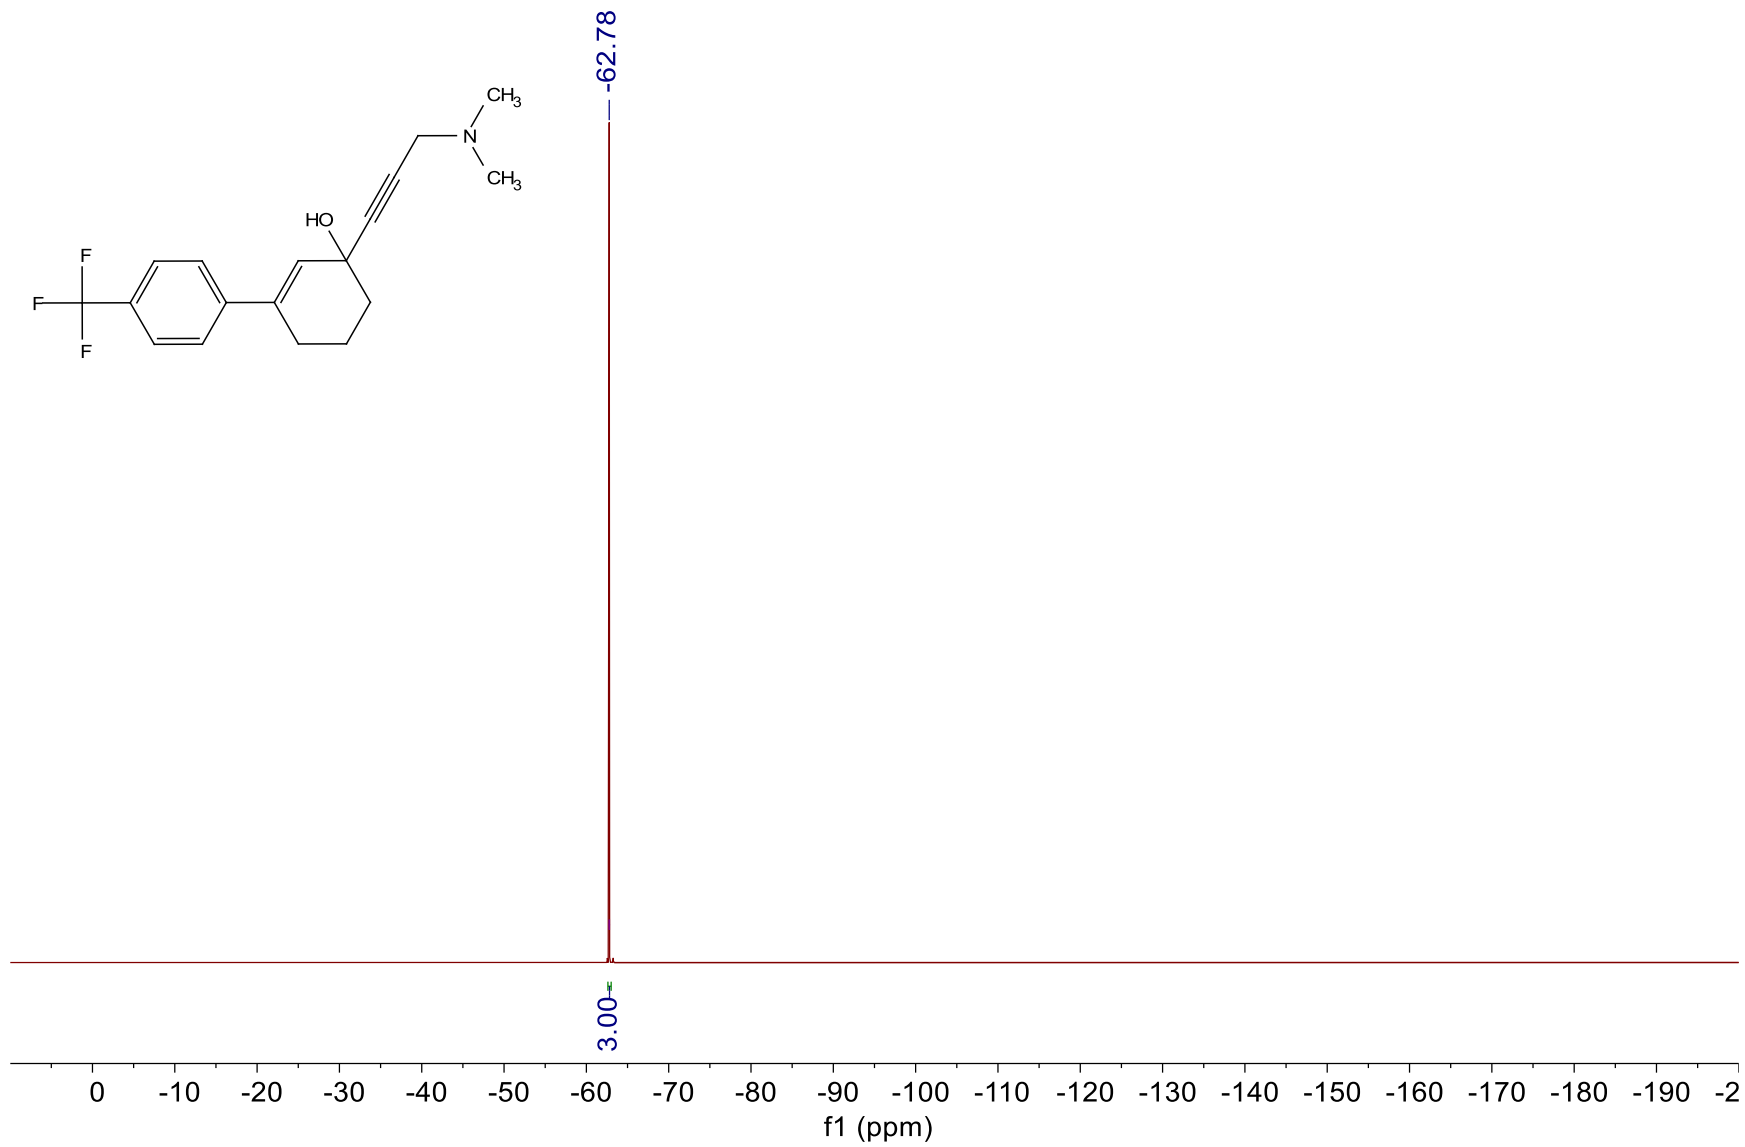

1g 3-(3-(dimethylamino)prop-1-yn-1-yl)-4'-(trifluoromethyl)-3,4,5,6-tetrahydro-[1,1'-biphenyl]-3-ol  
<sup>13</sup>C NMR at 100.63 MHz in CD<sub>2</sub>Cl<sub>2</sub>

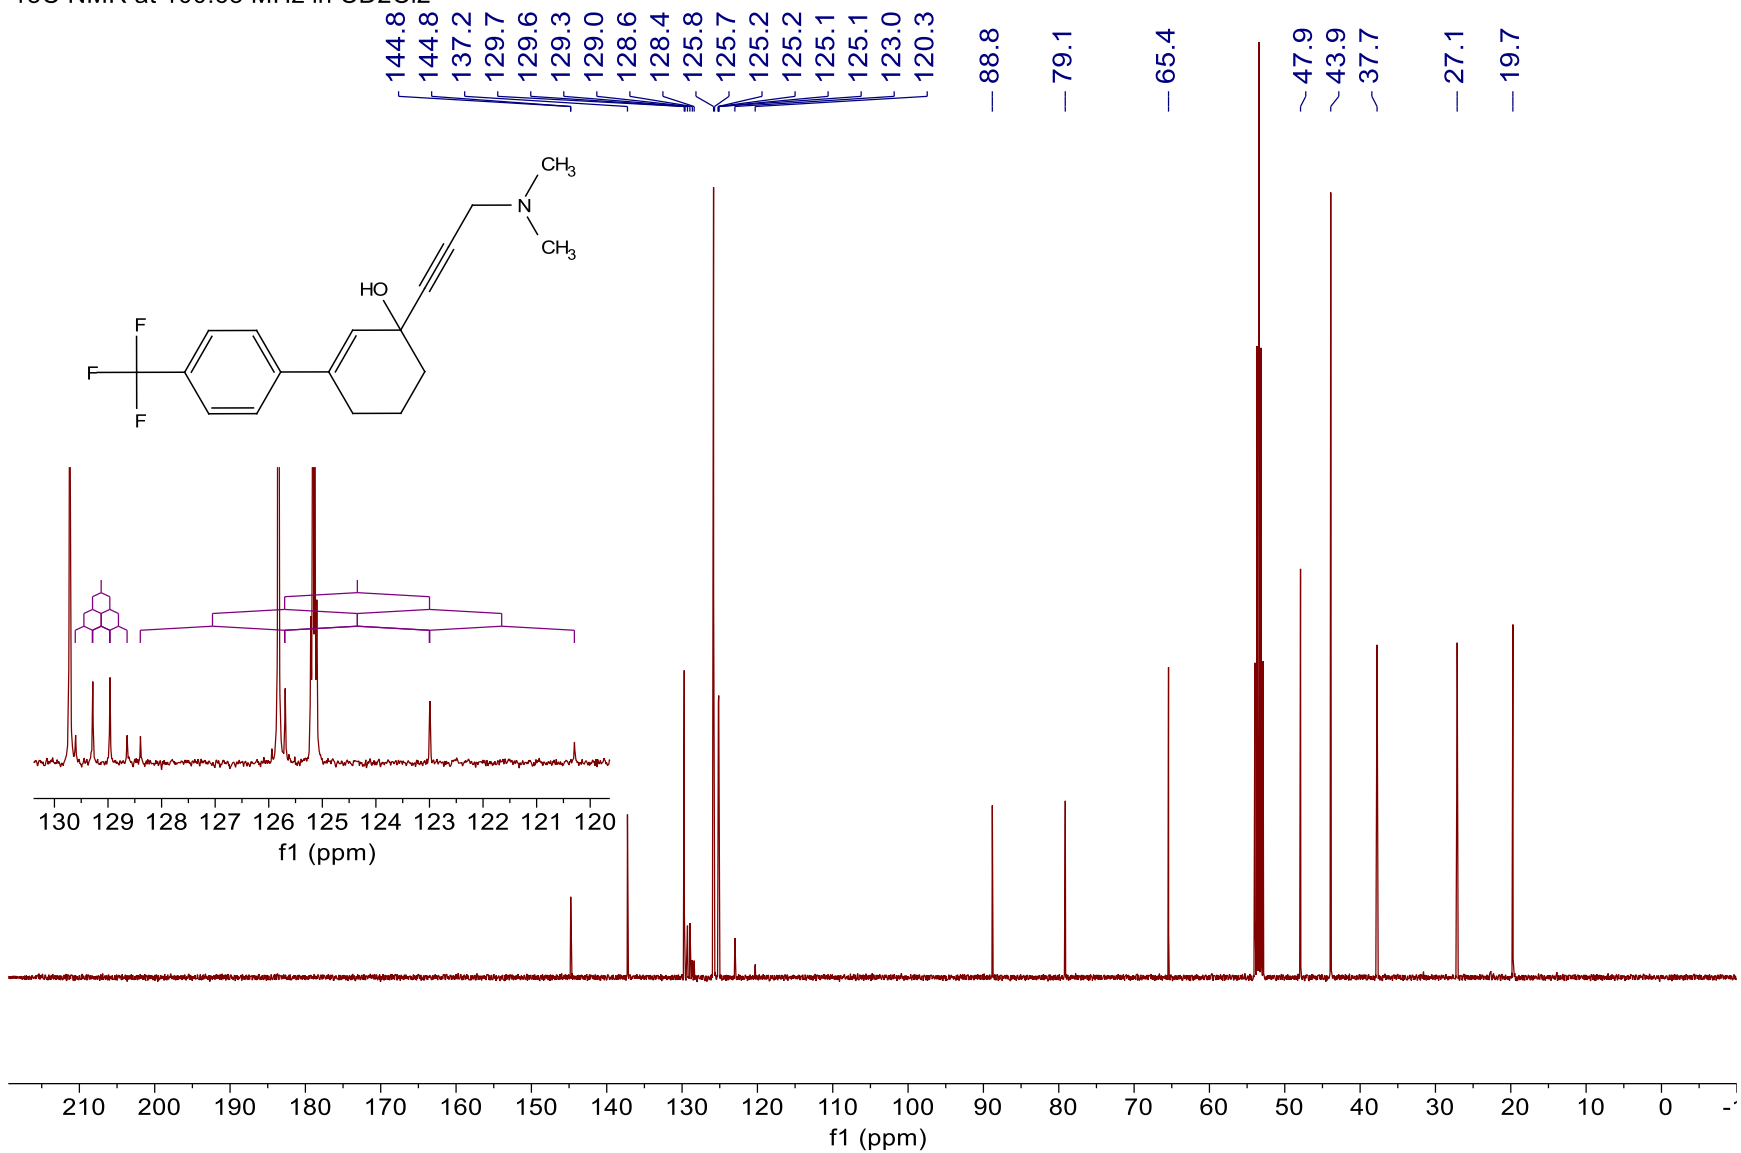

**1g 3-(3-(dimethylamino)prop-1-yn-1-yl)-4'-(trifluoromethyl)-3,4,5,6-tetrahydro-[1,1'-biphenyl]-3-ol**

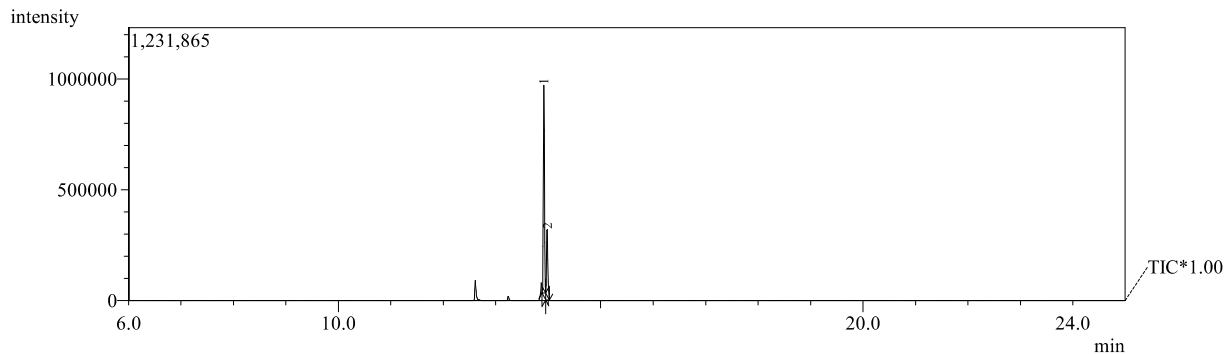

Line#:1 R.Time:13.9(Scan#:951)  
MassPeaks:174  
RawMode:Averaged 13.9-13.9(950-952) BasePeak:250(28515)  
BG Mode:Calc. from Peak

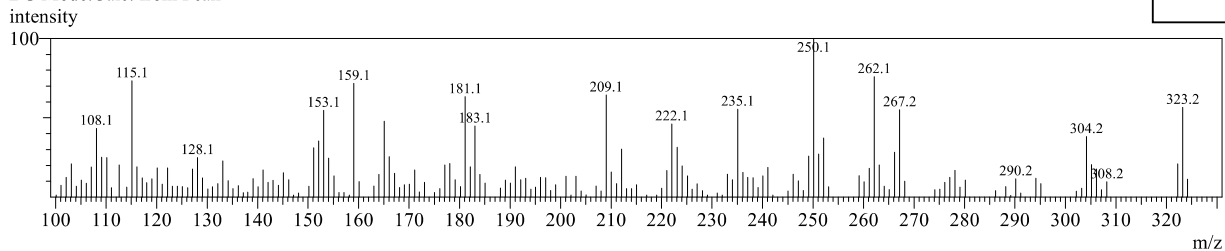

Line#:2 R.Time:14.0(Scan#:959)  
MassPeaks:100  
RawMode:Averaged 14.0-14.0(958-960) BasePeak:305(16380)  
BG Mode:Calc. from Peak

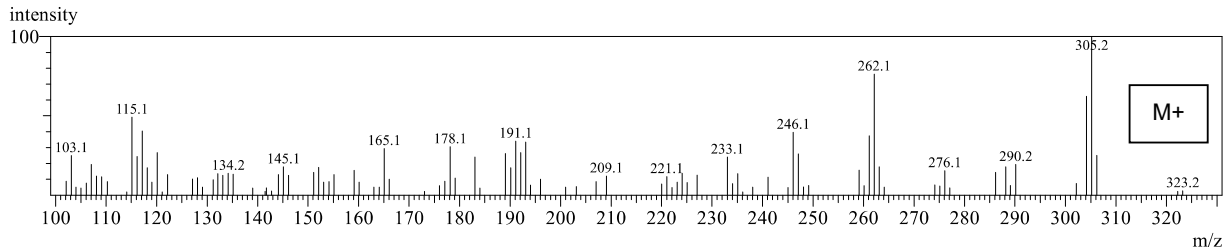



1h 3-(prop-1-yn-1-yl)-3,4,5,6-tetrahydro-[1,1'-biphenyl]-3-ol  
1H NMR at 400.15 MHz in CD<sub>2</sub>Cl<sub>2</sub>

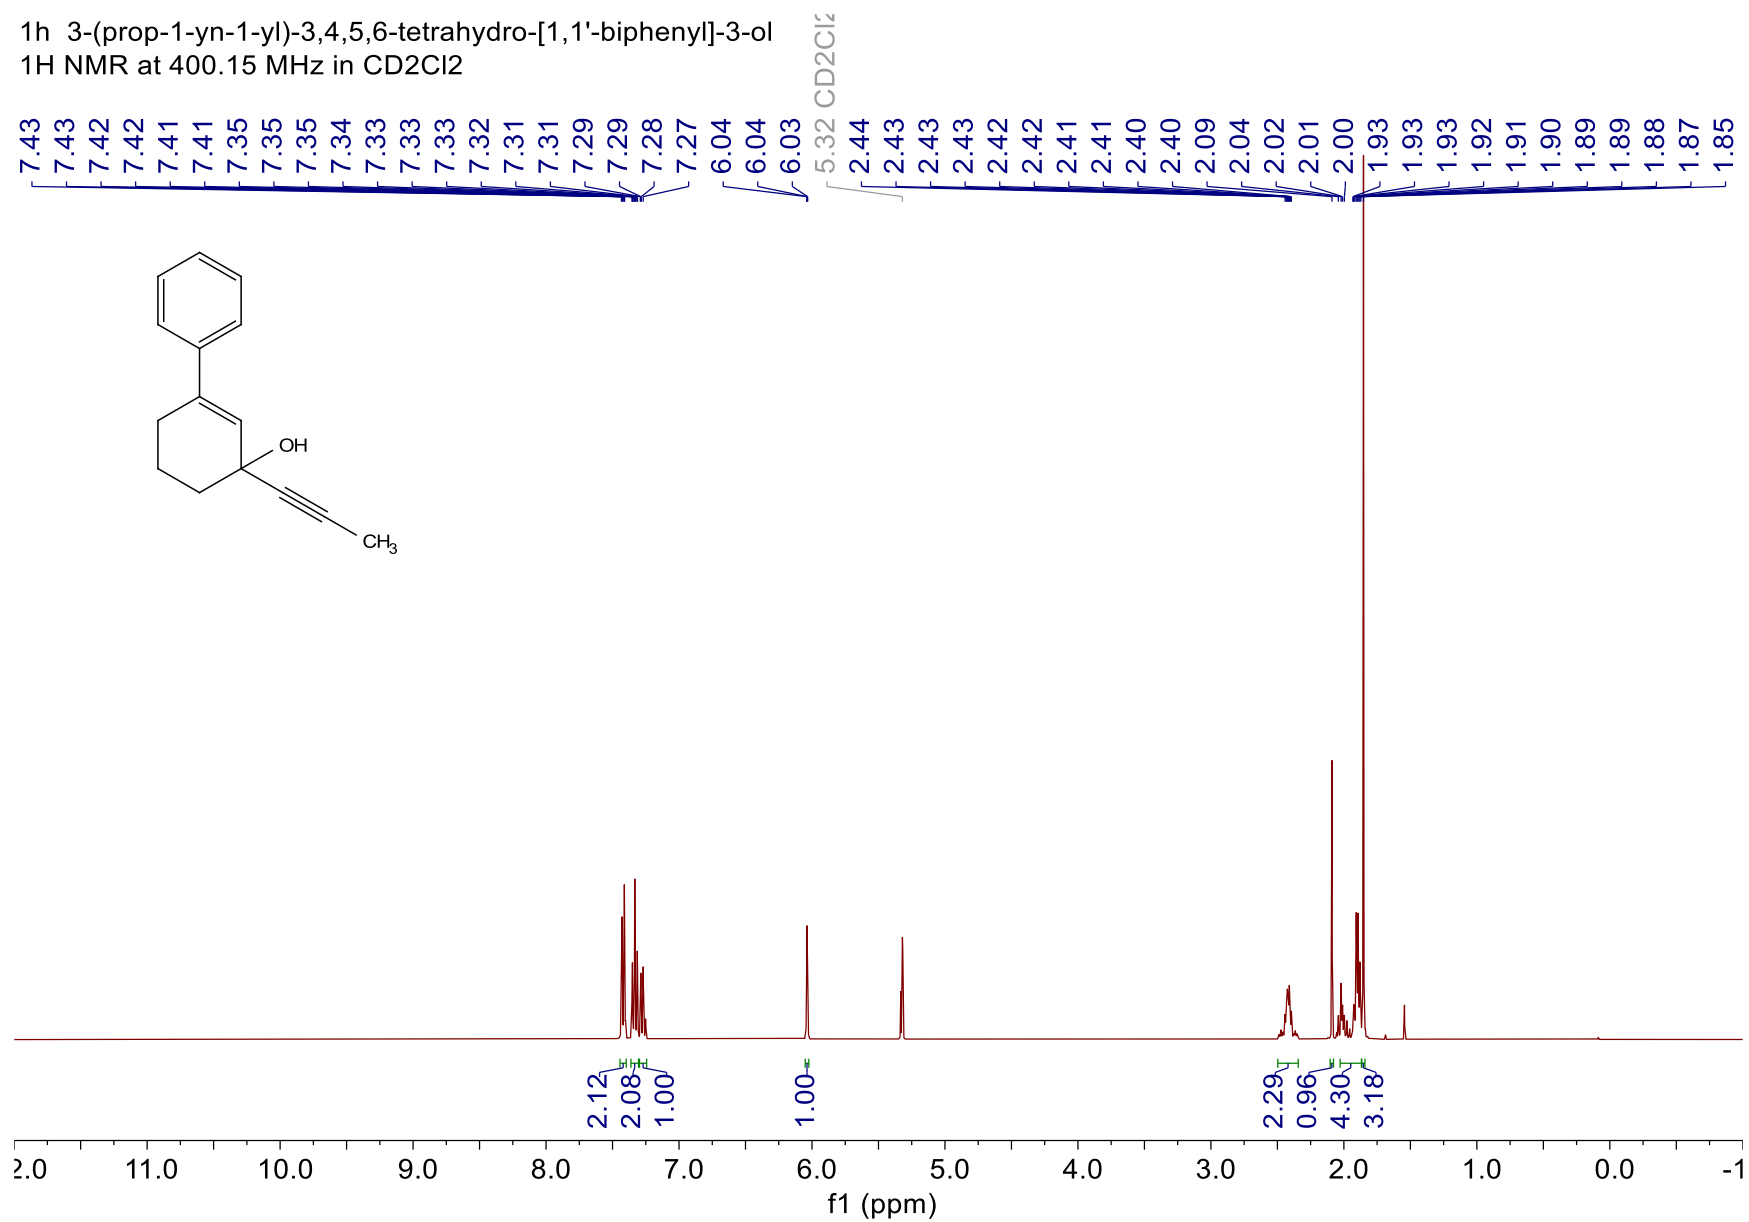

1h 3-(prop-1-yn-1-yl)-3,4,5,6-tetrahydro-[1,1'-biphenyl]-3-ol  
13C NMR at 100.63 MHz in CD2Cl2

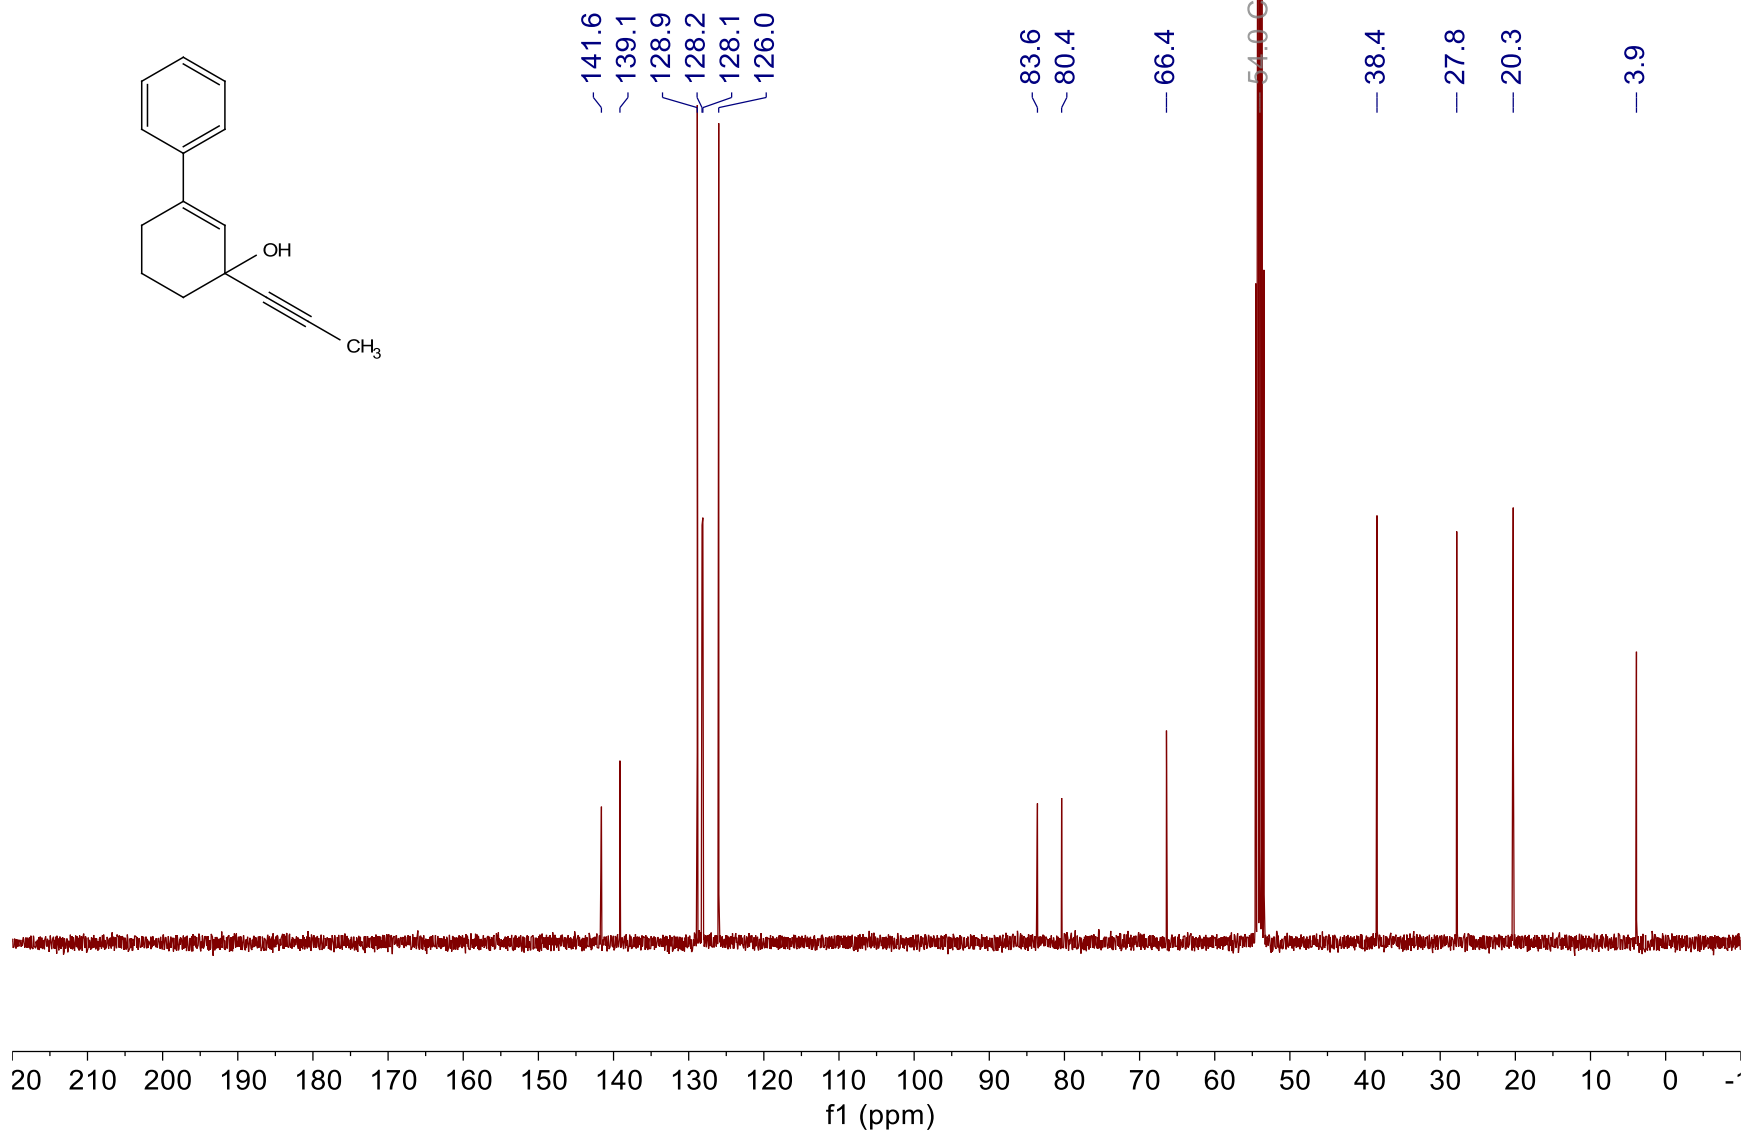

1i 3-ethynyl-4'-(trifluoromethyl)-3,4,5,6-tetrahydro-[1,1'-biphenyl]-3-ol  
1H NMR at 400.15 MHz in CD2Cl2

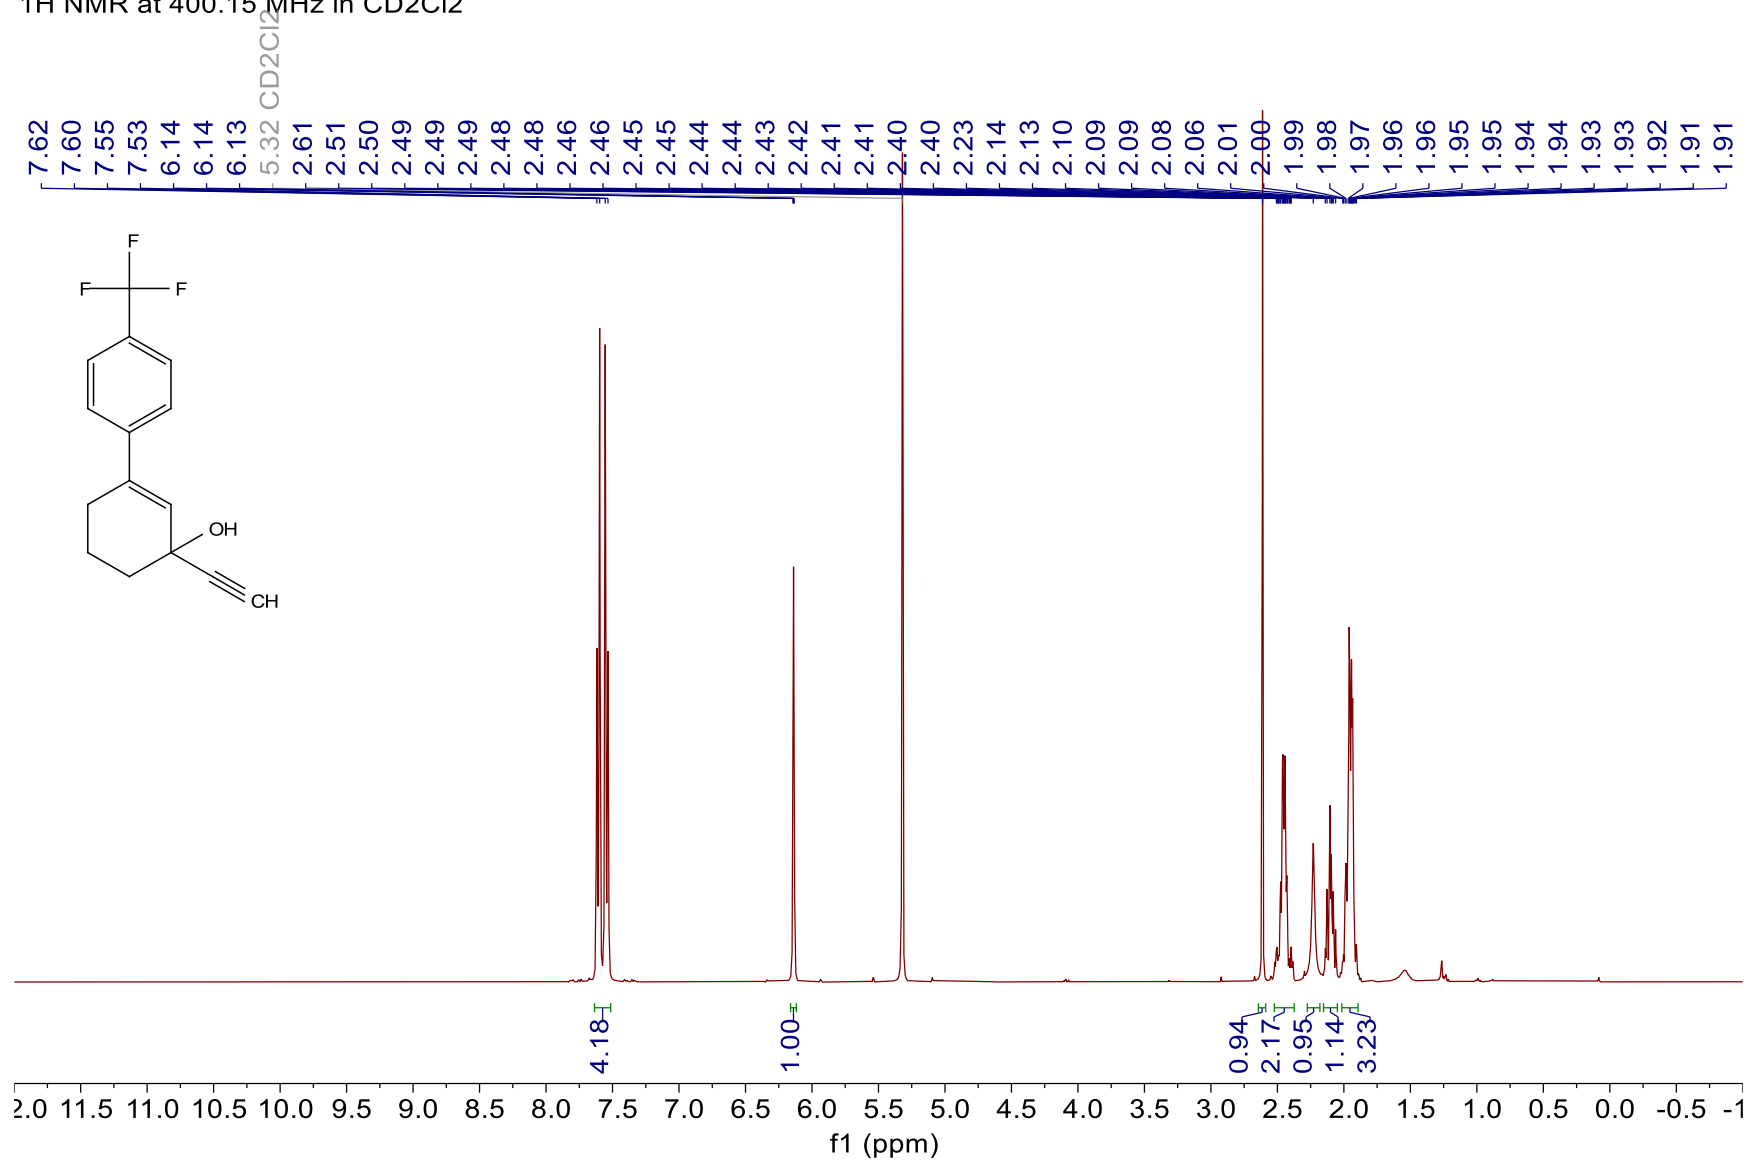

1i 3-ethynyl-4'-(trifluoromethyl)-3,4,5,6-tetrahydro-[1,1'-biphenyl]-3-ol  
19F NMR at 376.48 MHz in CD2Cl2

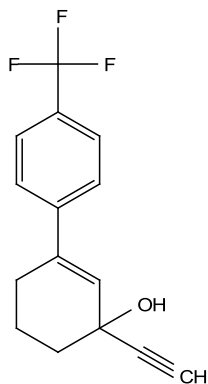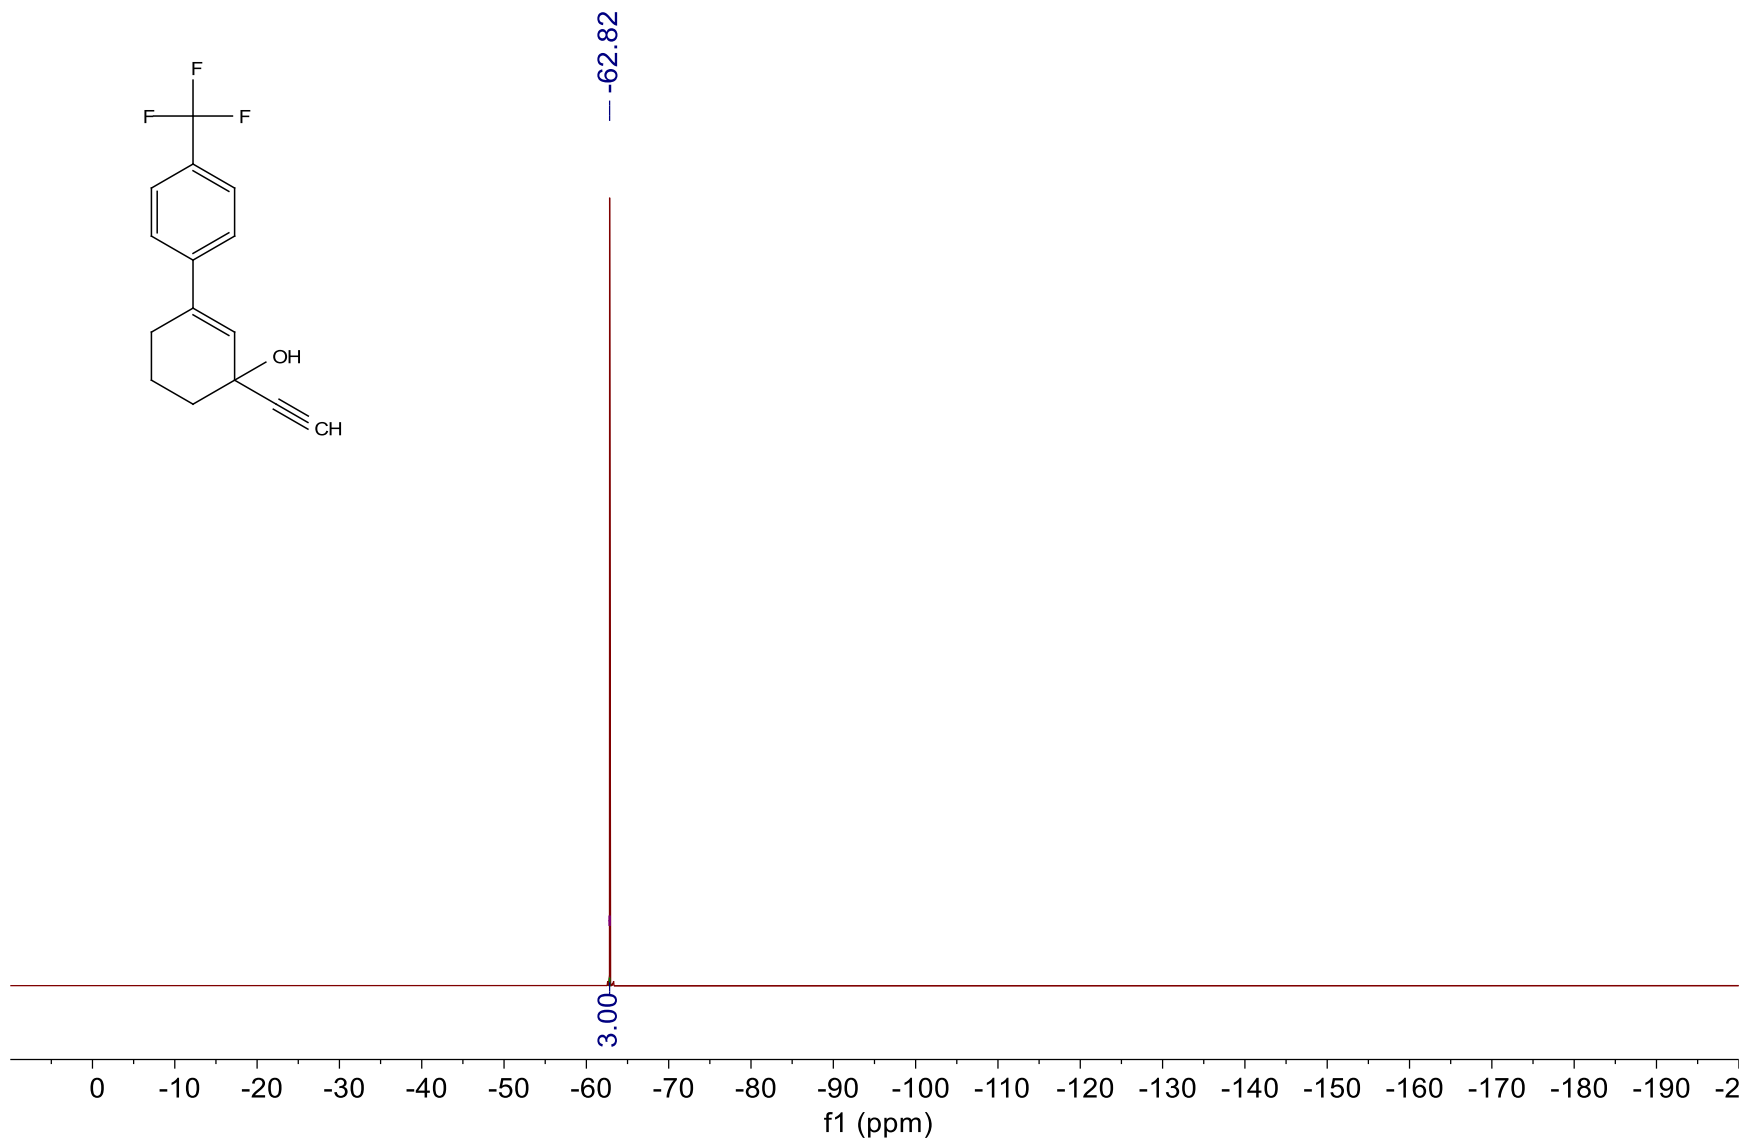

1i 3-ethynyl-4'-(trifluoromethyl)-3,4,5,6-tetrahydro-[1,1'-biphenyl]-3-ol  
13C NMR at 100.63 MHz in CD2Cl2

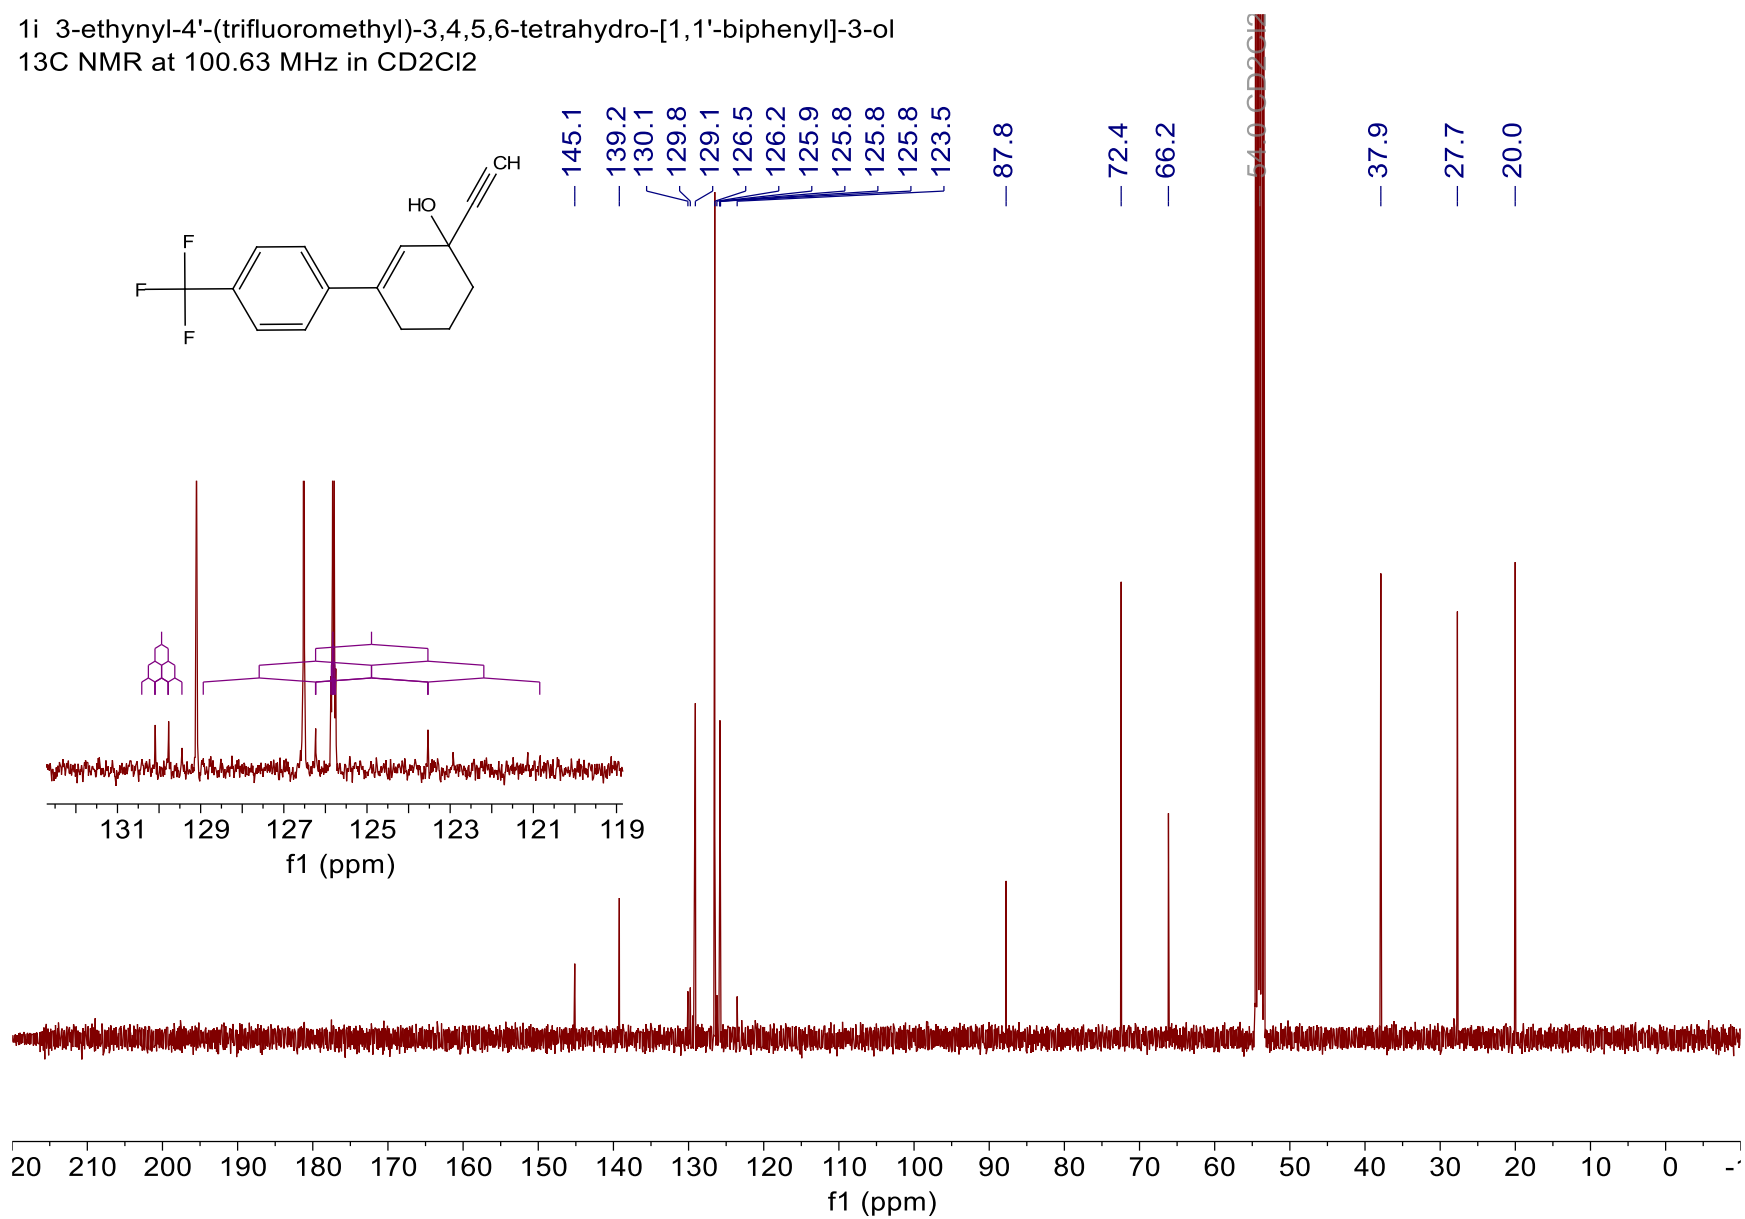

**1i 3-ethynyl-4'-(trifluoromethyl)-3,4,5,6-tetrahydro-[1,1'-biphenyl]-3-ol**

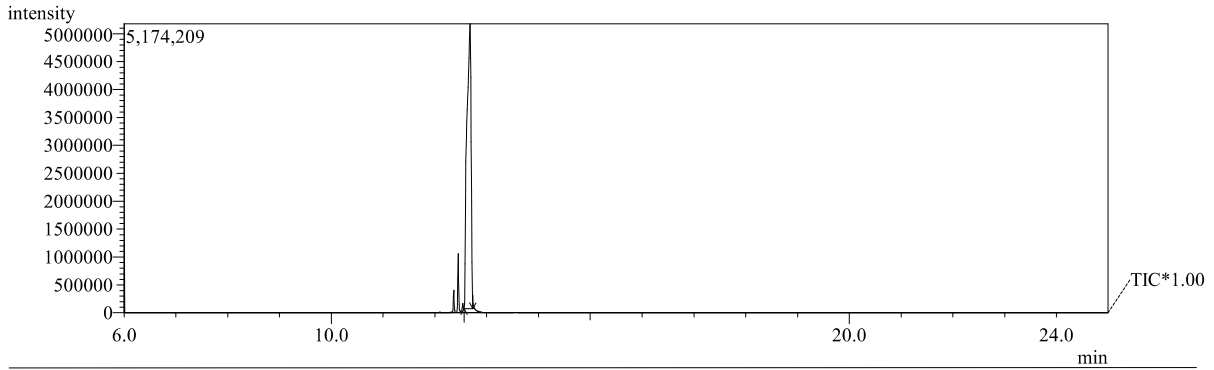

MassPeaks:152  
RawMode:Averaged 12.7-12.7(802-804) BasePeak:238(459568)  
BG Mode:Calc. from Peak

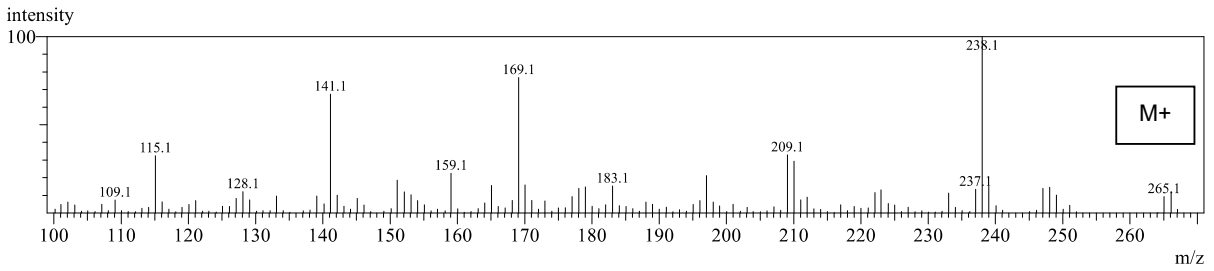

1j 4'-methyl-3,4,5,6-tetrahydro-[1,1'-biphenyl]-3-ol  
1H NMR at 400.15 MHz in CDCl3

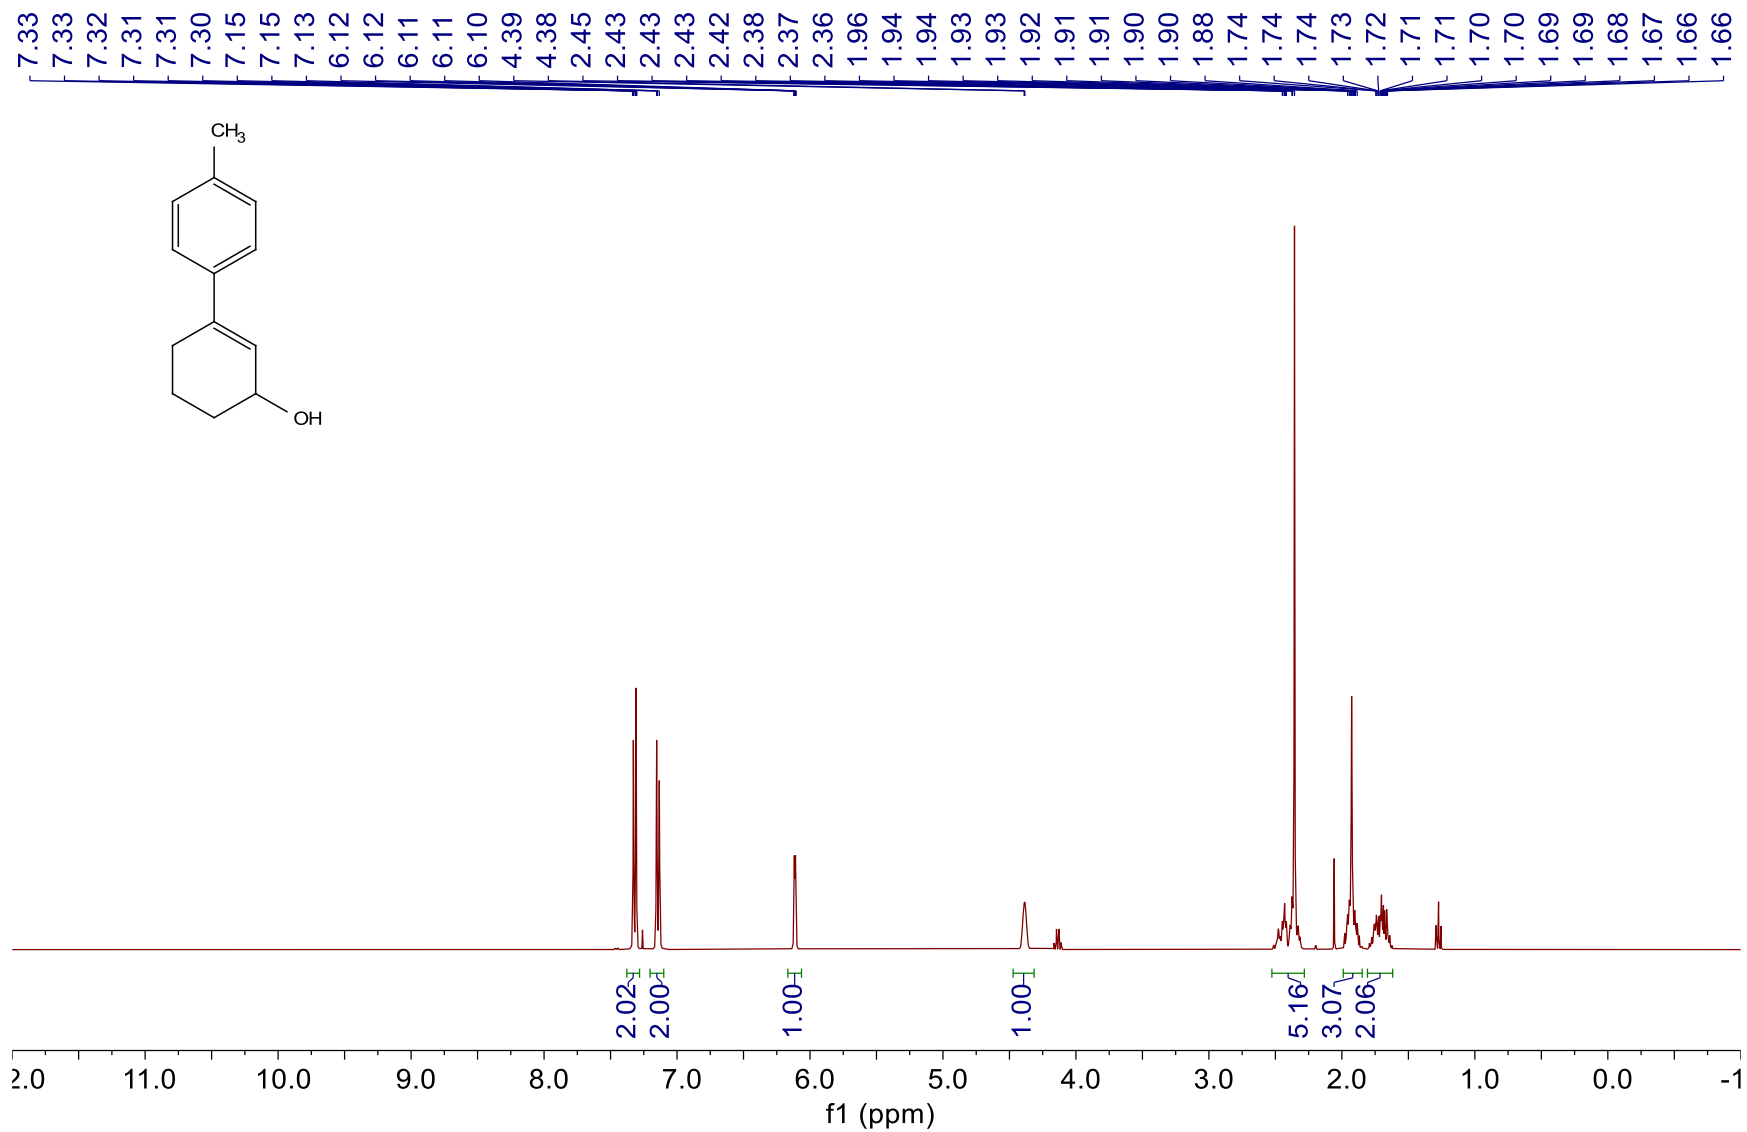

1j 4'-methyl-3,4,5,6-tetrahydro-[1,1'-biphenyl]-3-ol  
13C NMR at 100.63 MHz in CDCl3

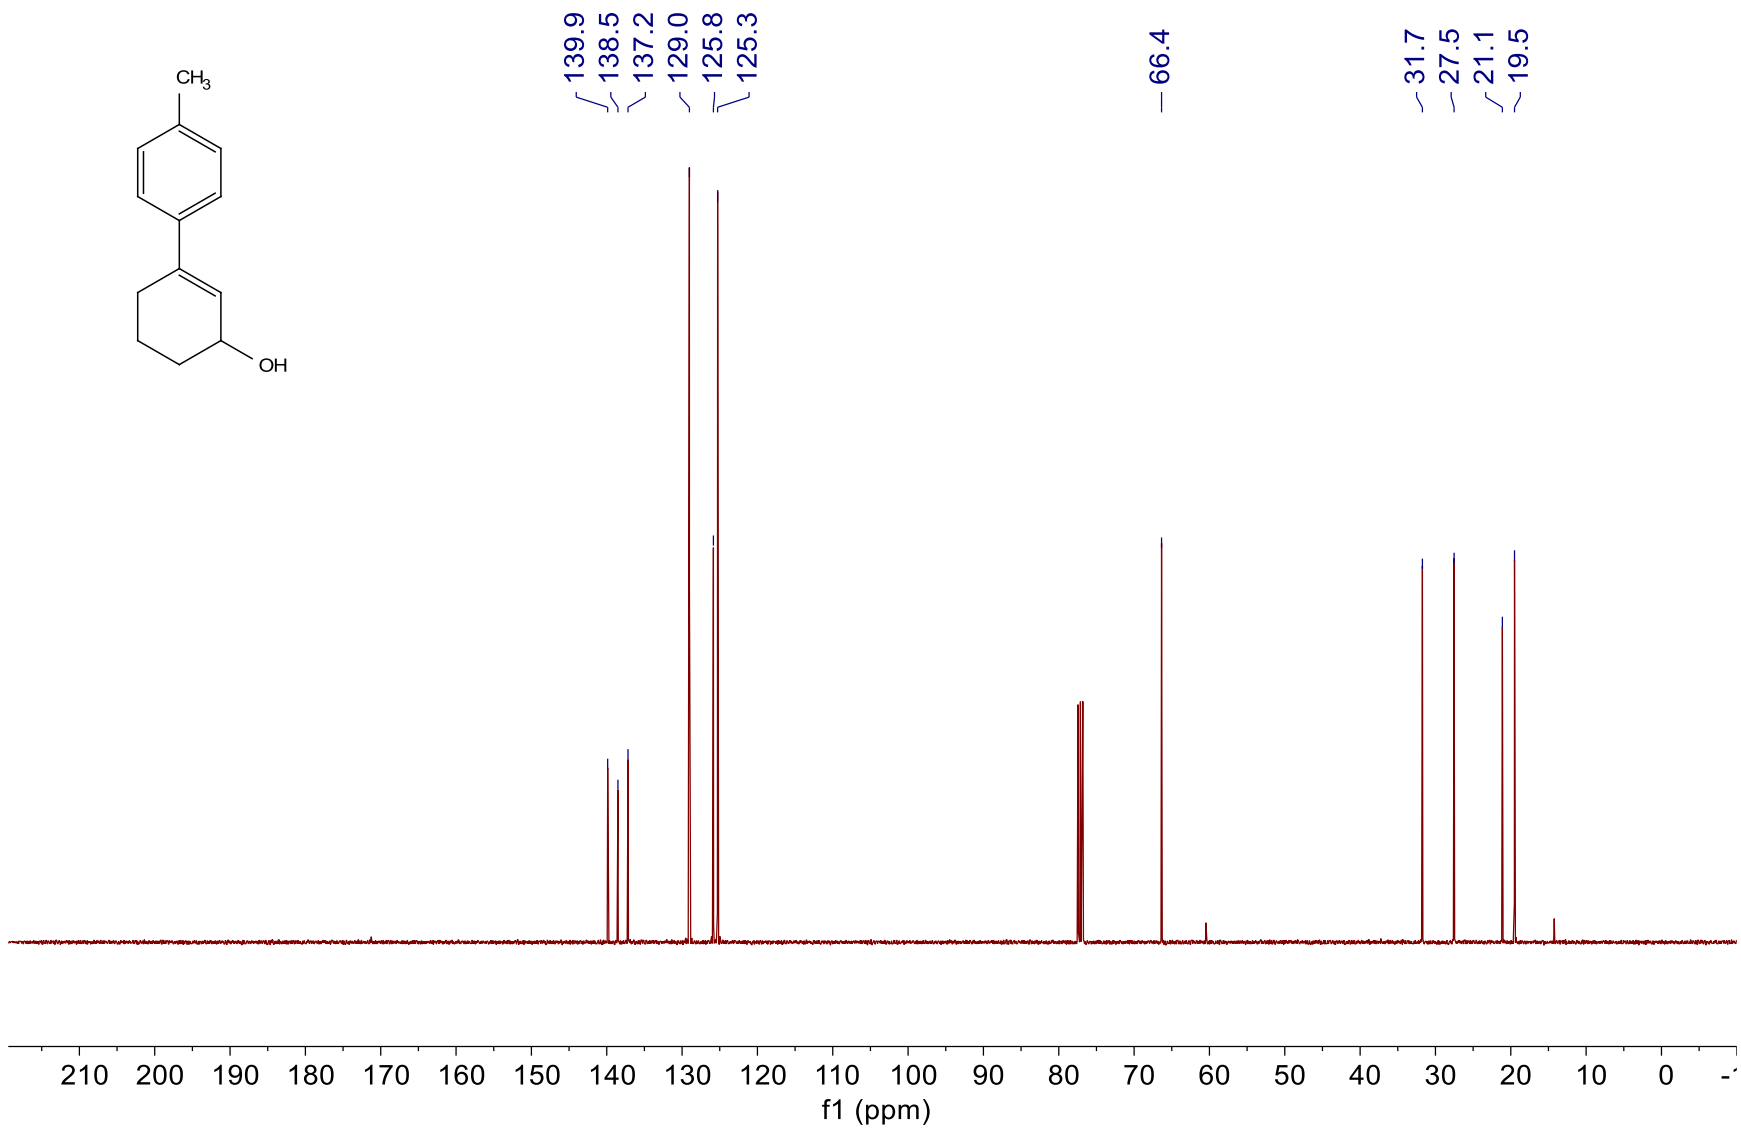



1k 4'-(trifluoromethyl)-3,4,5,6-tetrahydro-[1,1'-biphenyl]-3-ol  
1H NMR at 400.15 MHz in CD3CN

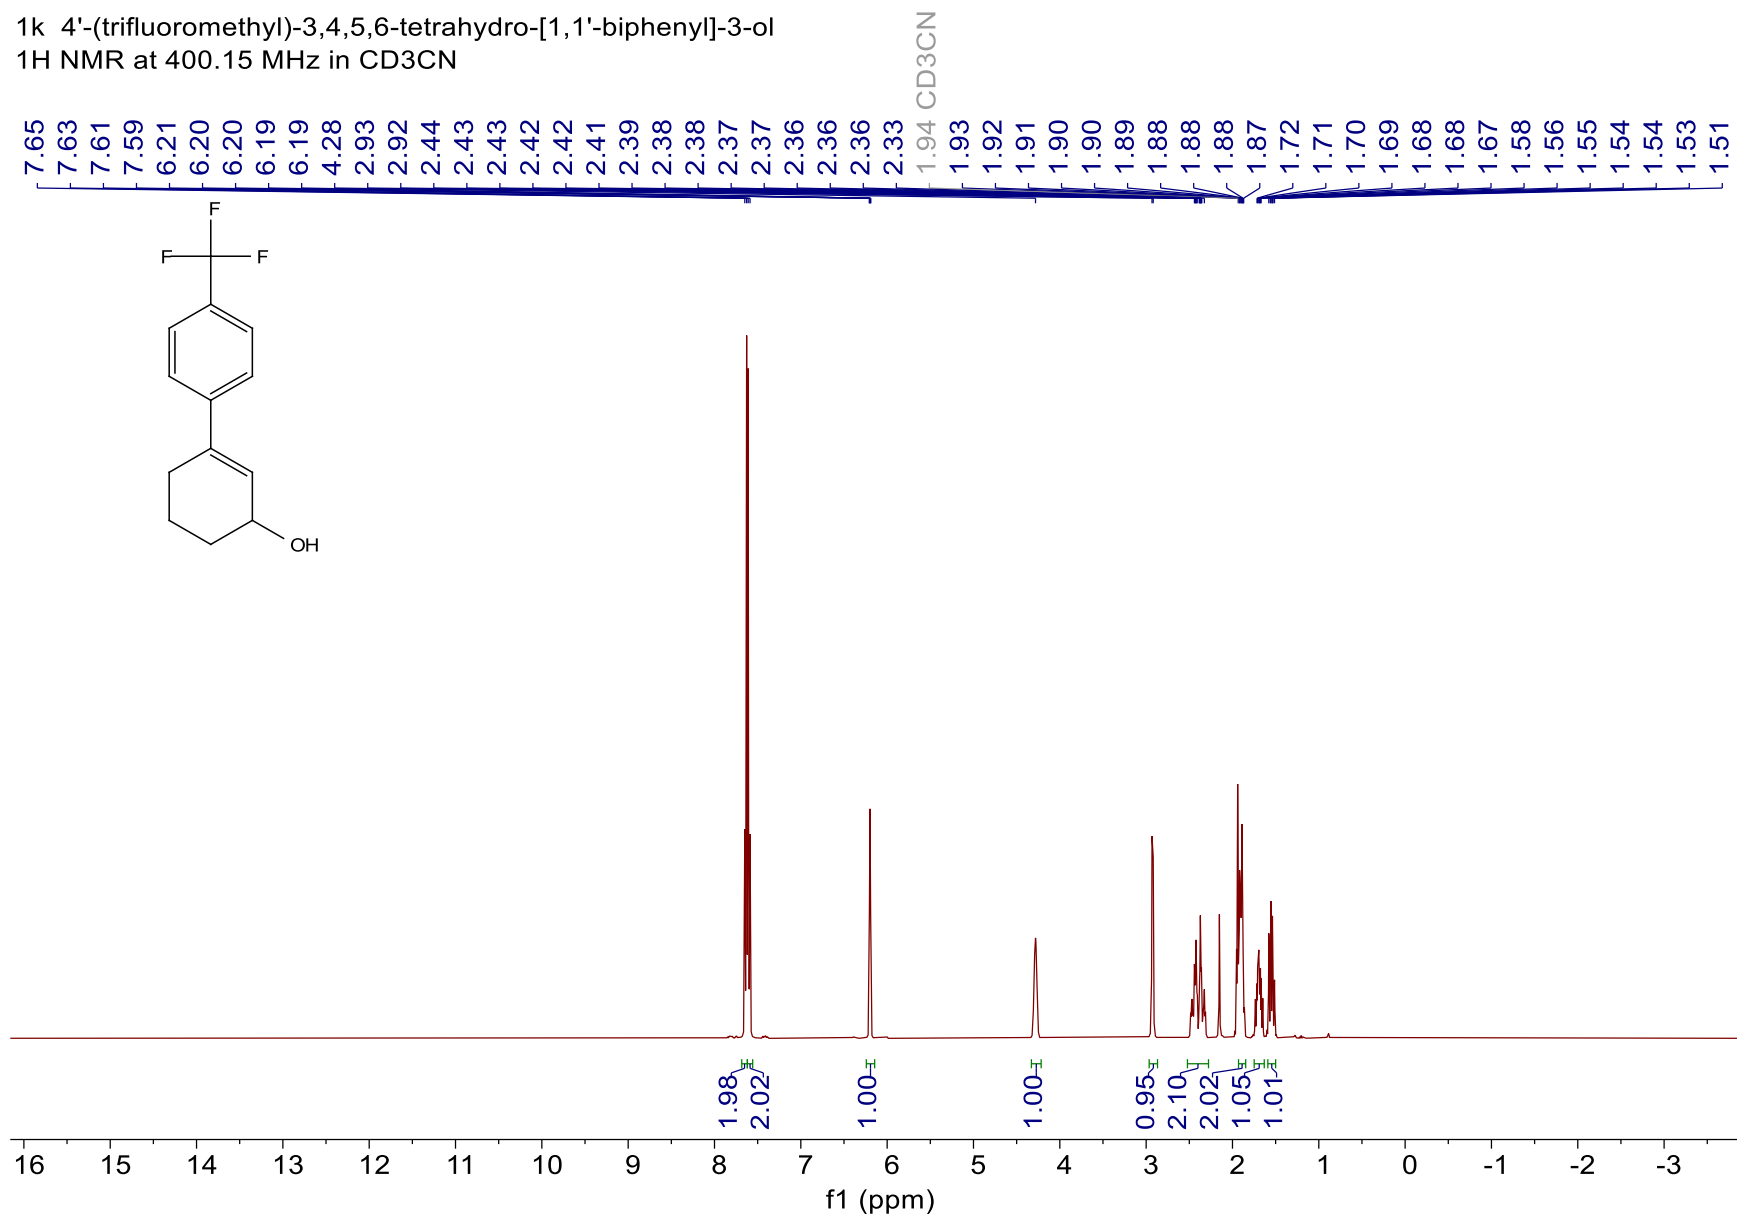

1k 4'-(trifluoromethyl)-3,4,5,6-tetrahydro-[1,1'-biphenyl]-3-ol  
19F NMR at 376.48 MHz in CD3CN

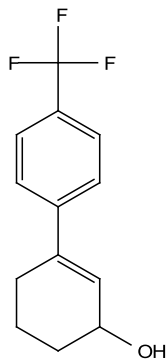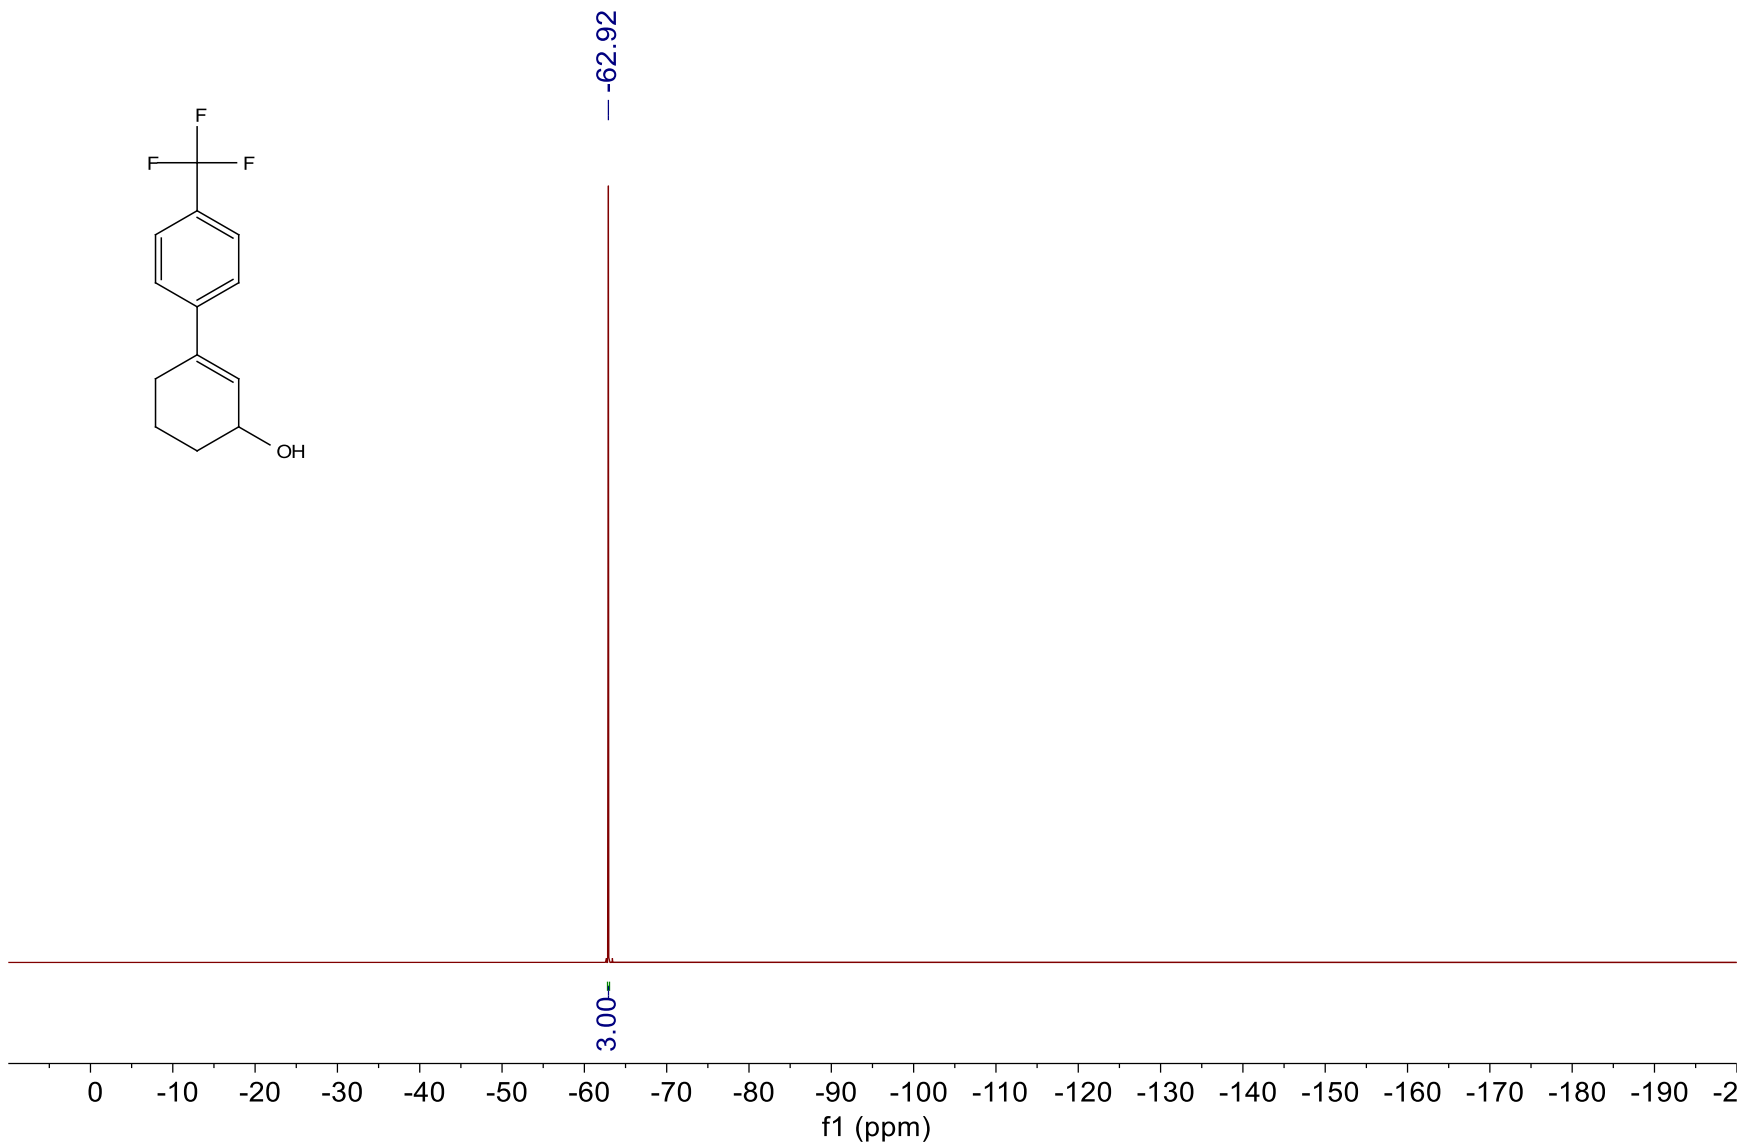

1k 4'-(trifluoromethyl)-3,4,5,6-tetrahydro-[1,1'-biphenyl]-3-ol  
13C NMR at 100.63 MHz in CD3CN

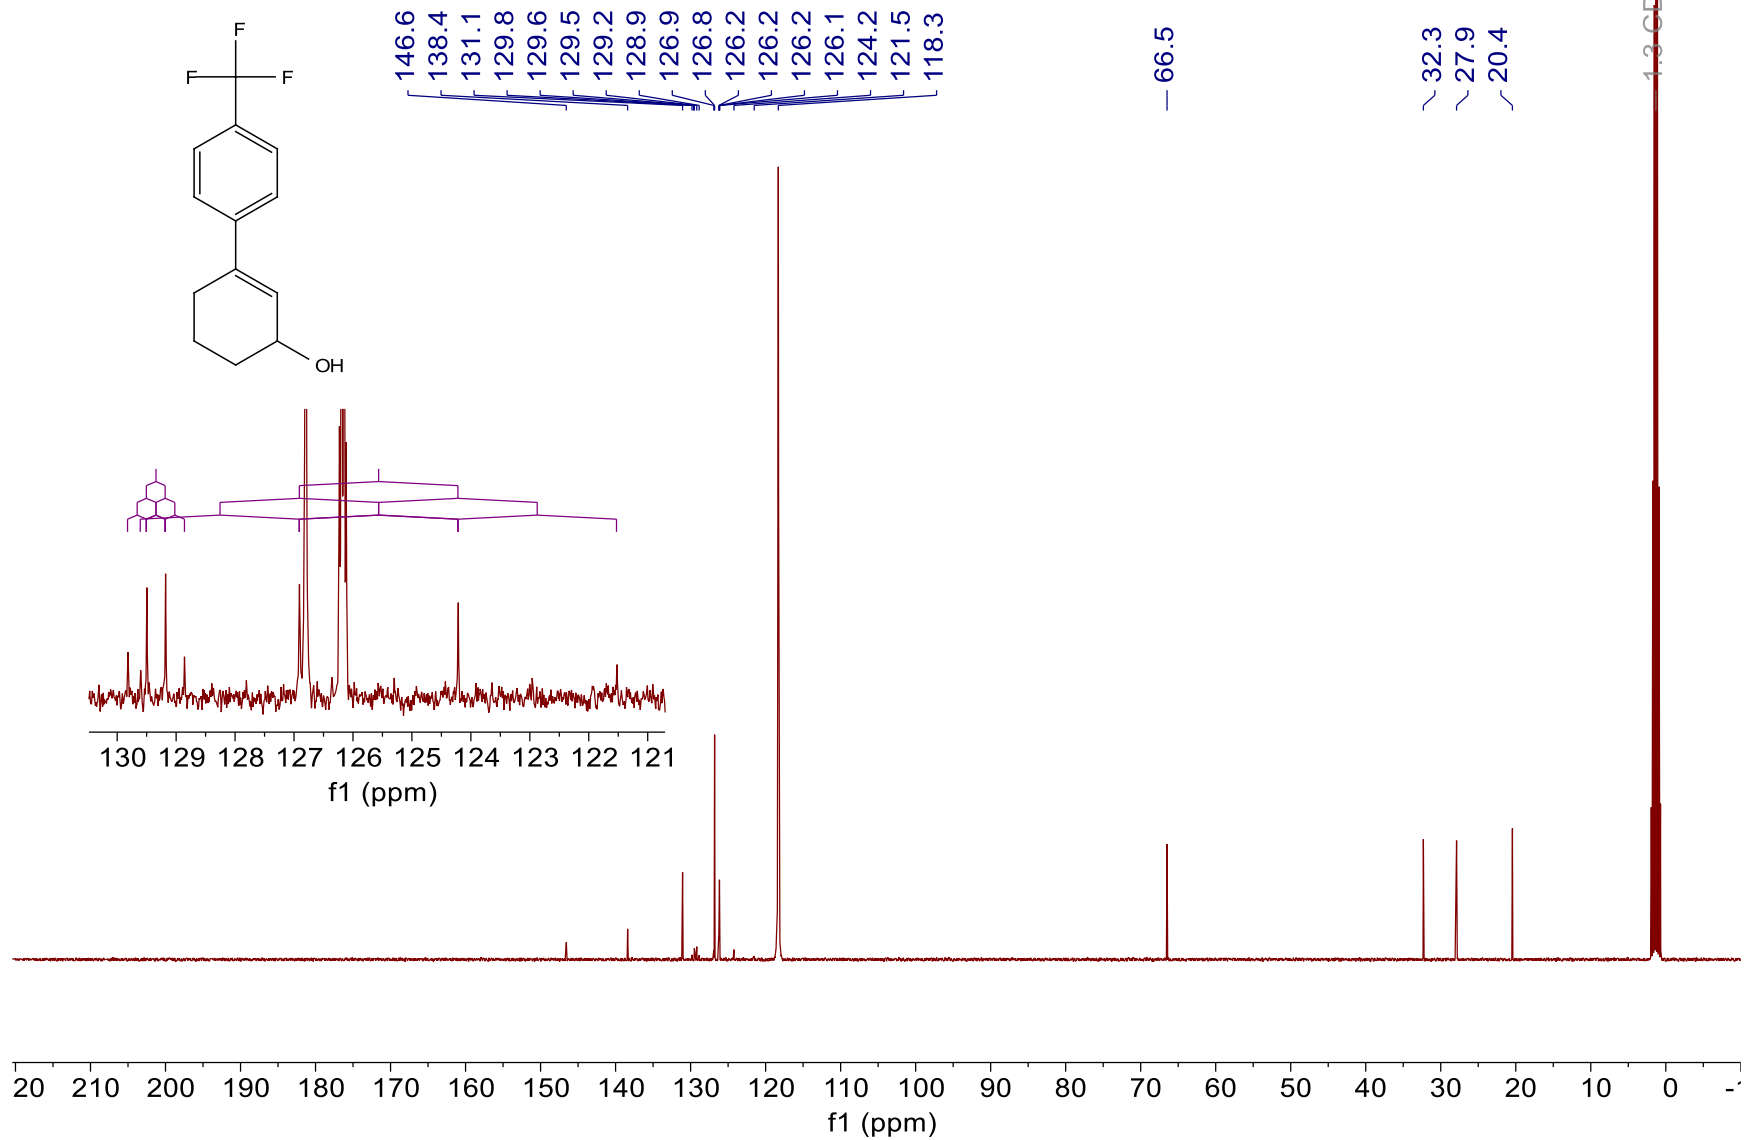

**1k 4'-(trifluoromethyl)-3,4,5,6-tetrahydro-[1,1'-biphenyl]-3-ol**

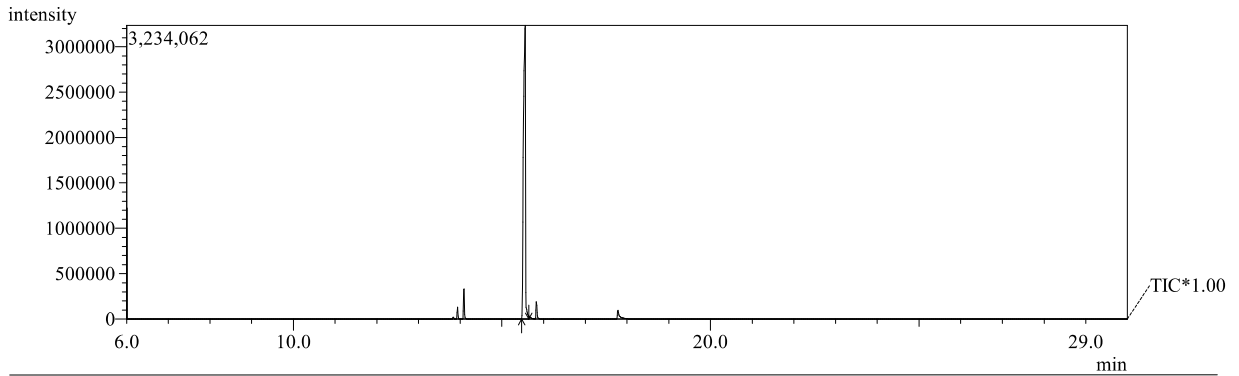

Spectrum

MassPeaks:124  
RawMode:Averaged 15.6-15.6(1147-1149) BasePeak:145(510831)  
BG Mode:Calc. from Peak  
intensity

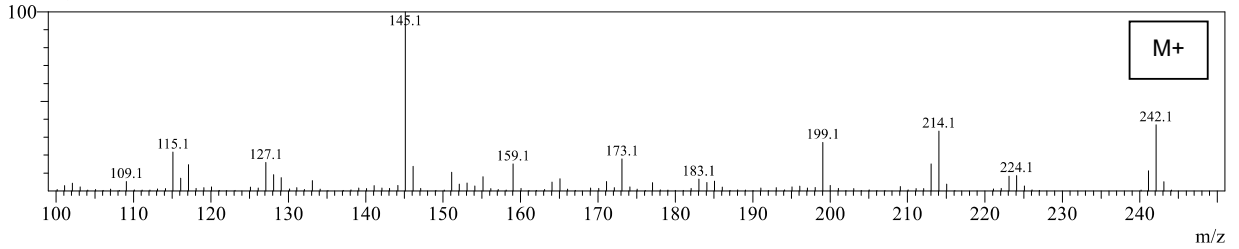

1l 3,4,5,6-tetrahydro-[1,1'-biphenyl]-3-ol  
1H NMR at 400.15 MHz in CD2Cl2

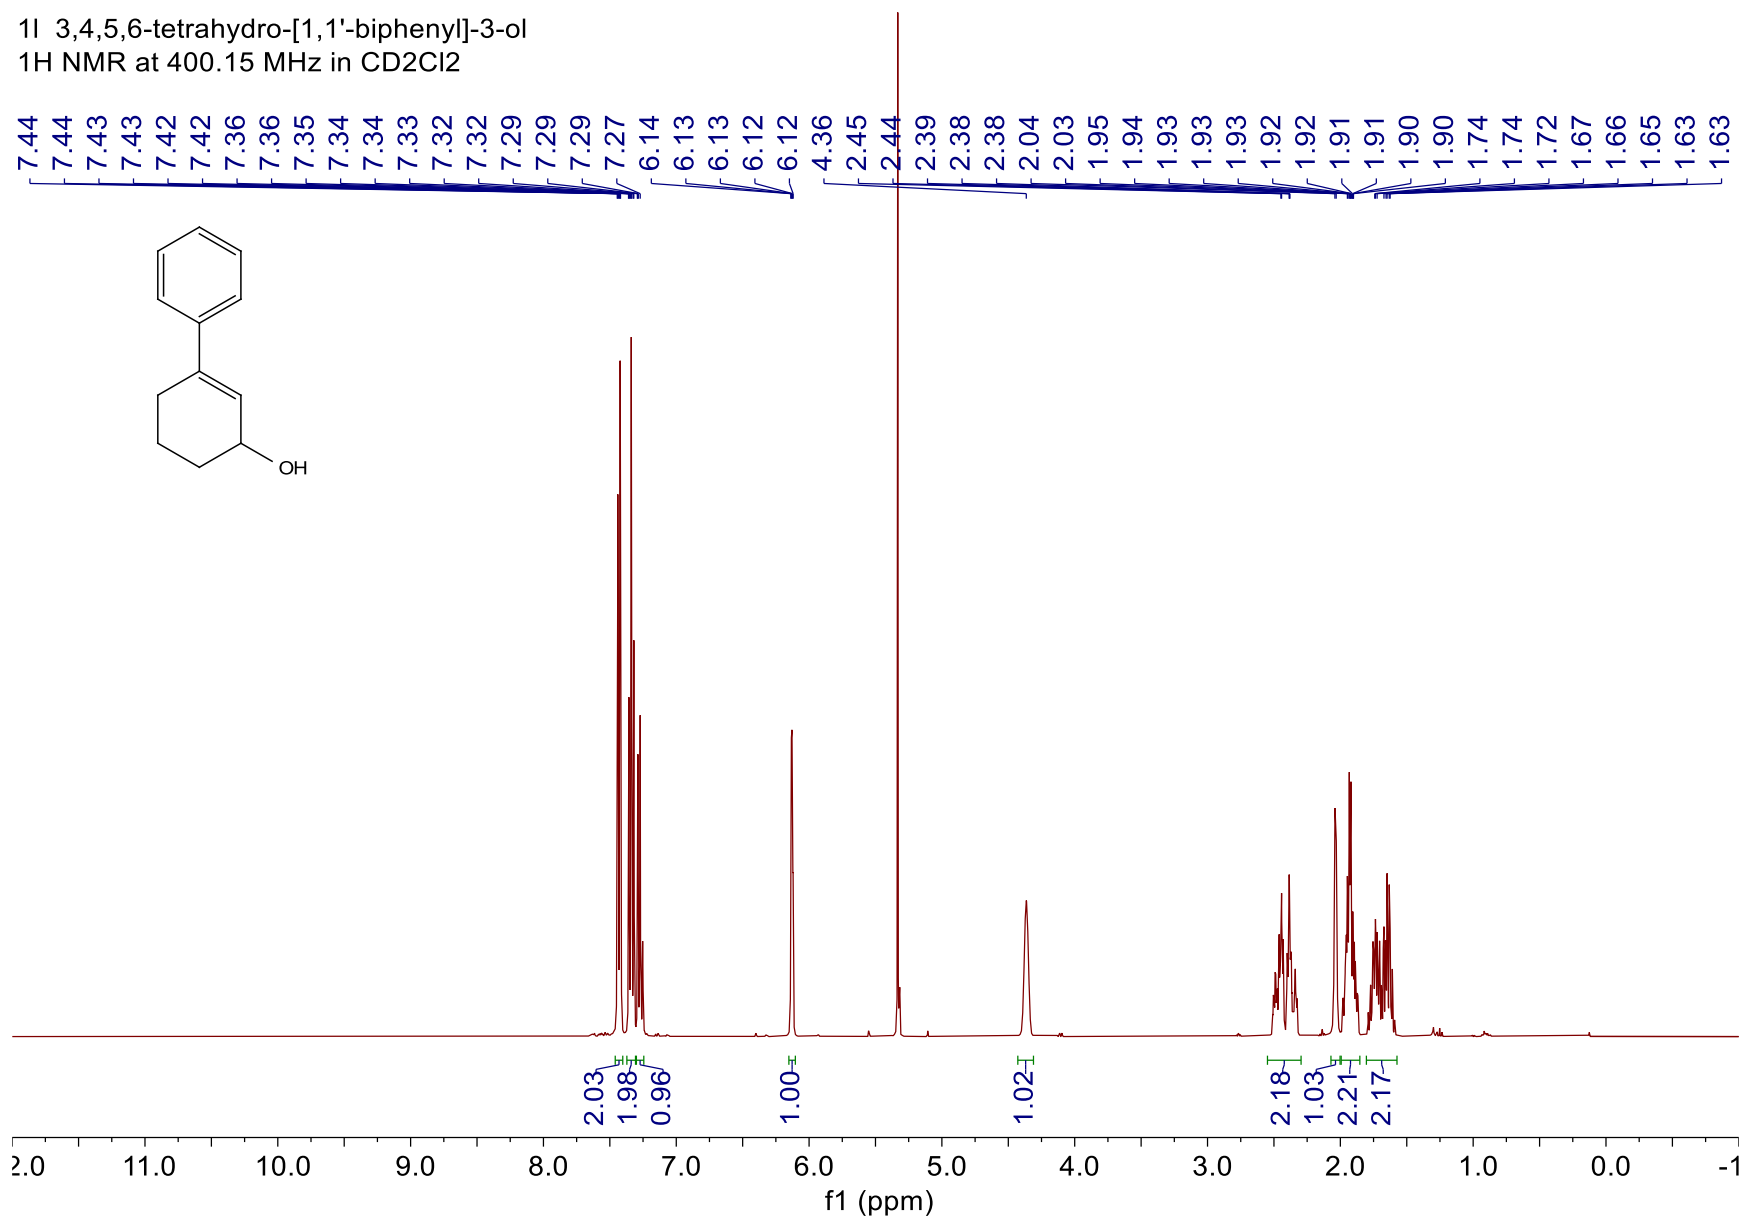

1l 3,4,5,6-tetrahydro-[1,1'-biphenyl]-3-ol  
13C NMR at 100.63 MHz in CD2Cl2

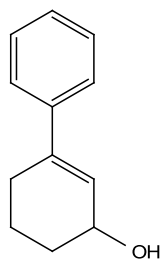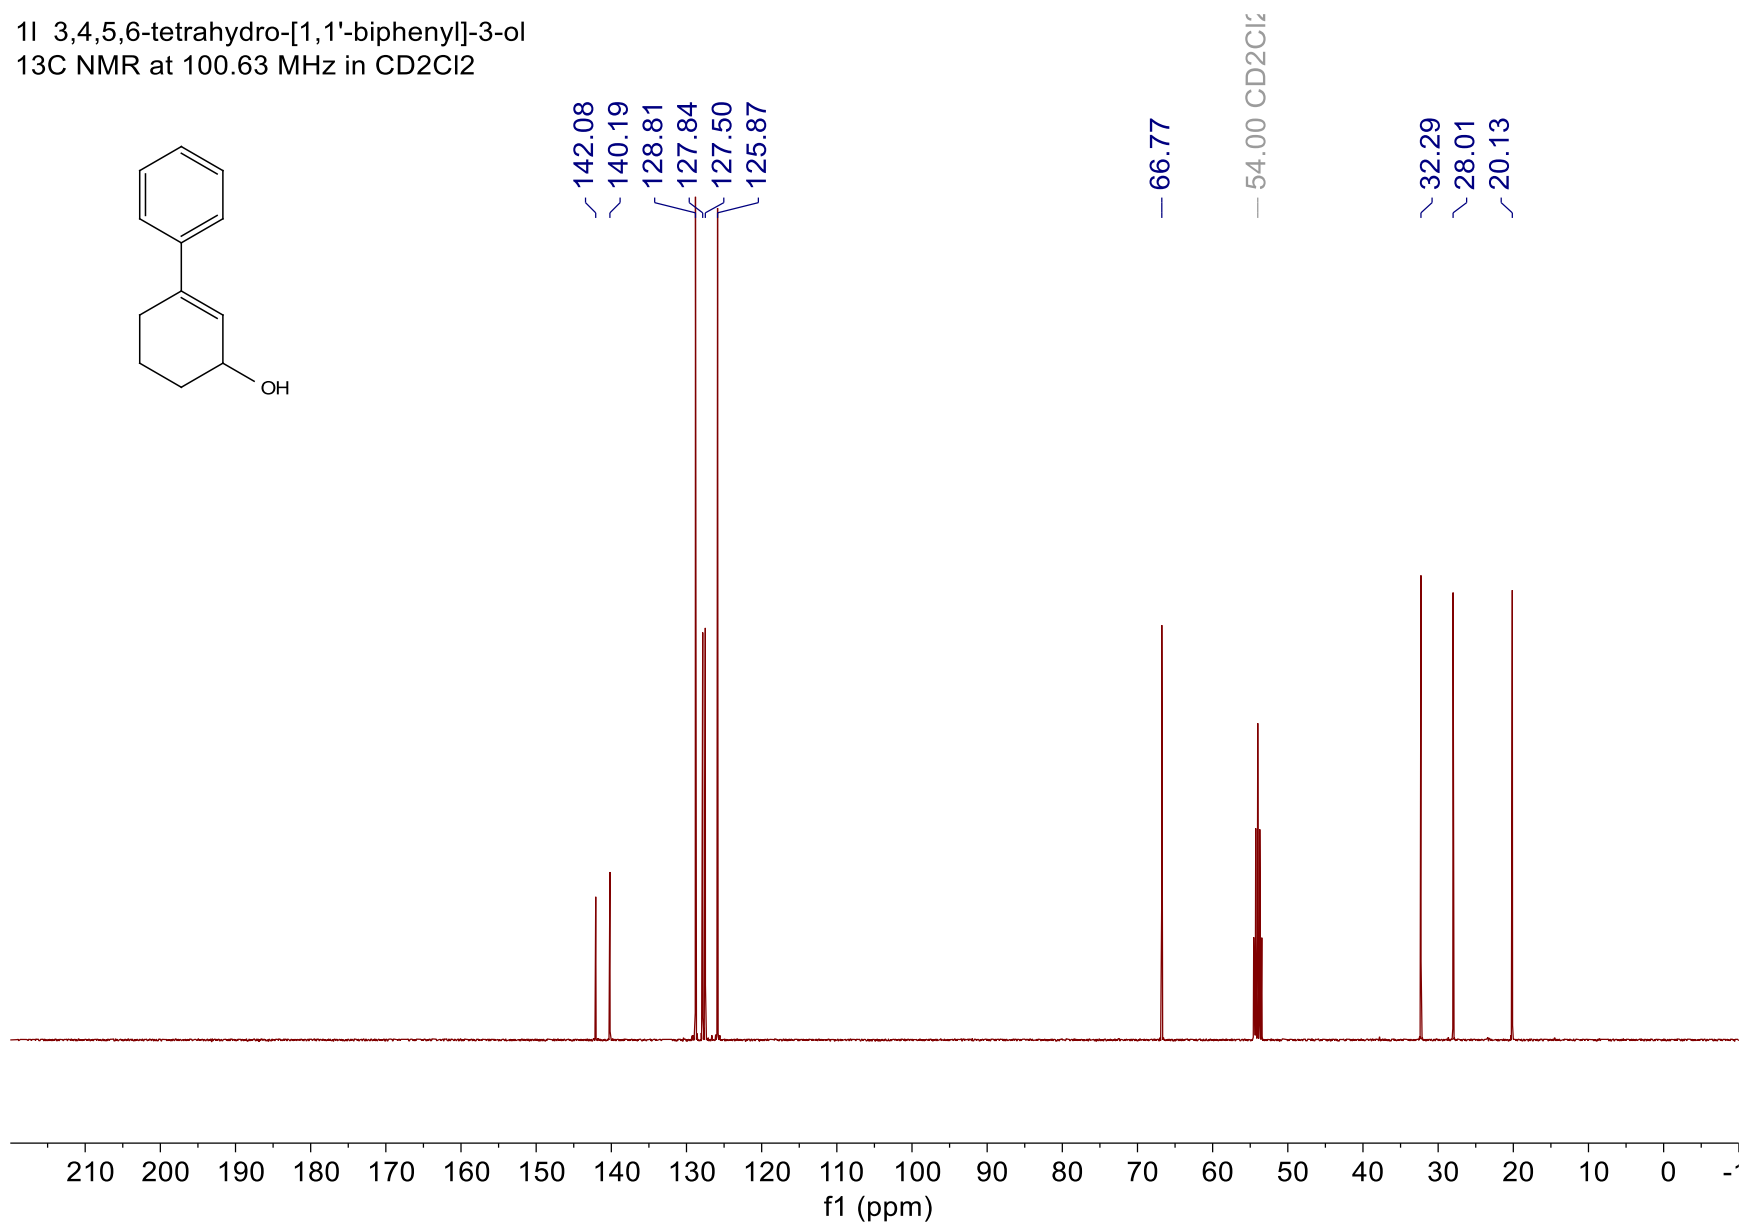

1m 4'-methoxy-3,4,5,6-tetrahydro-[1,1'-biphenyl]-3-ol  
1H NMR at 400.15 MHz in CD2Cl2

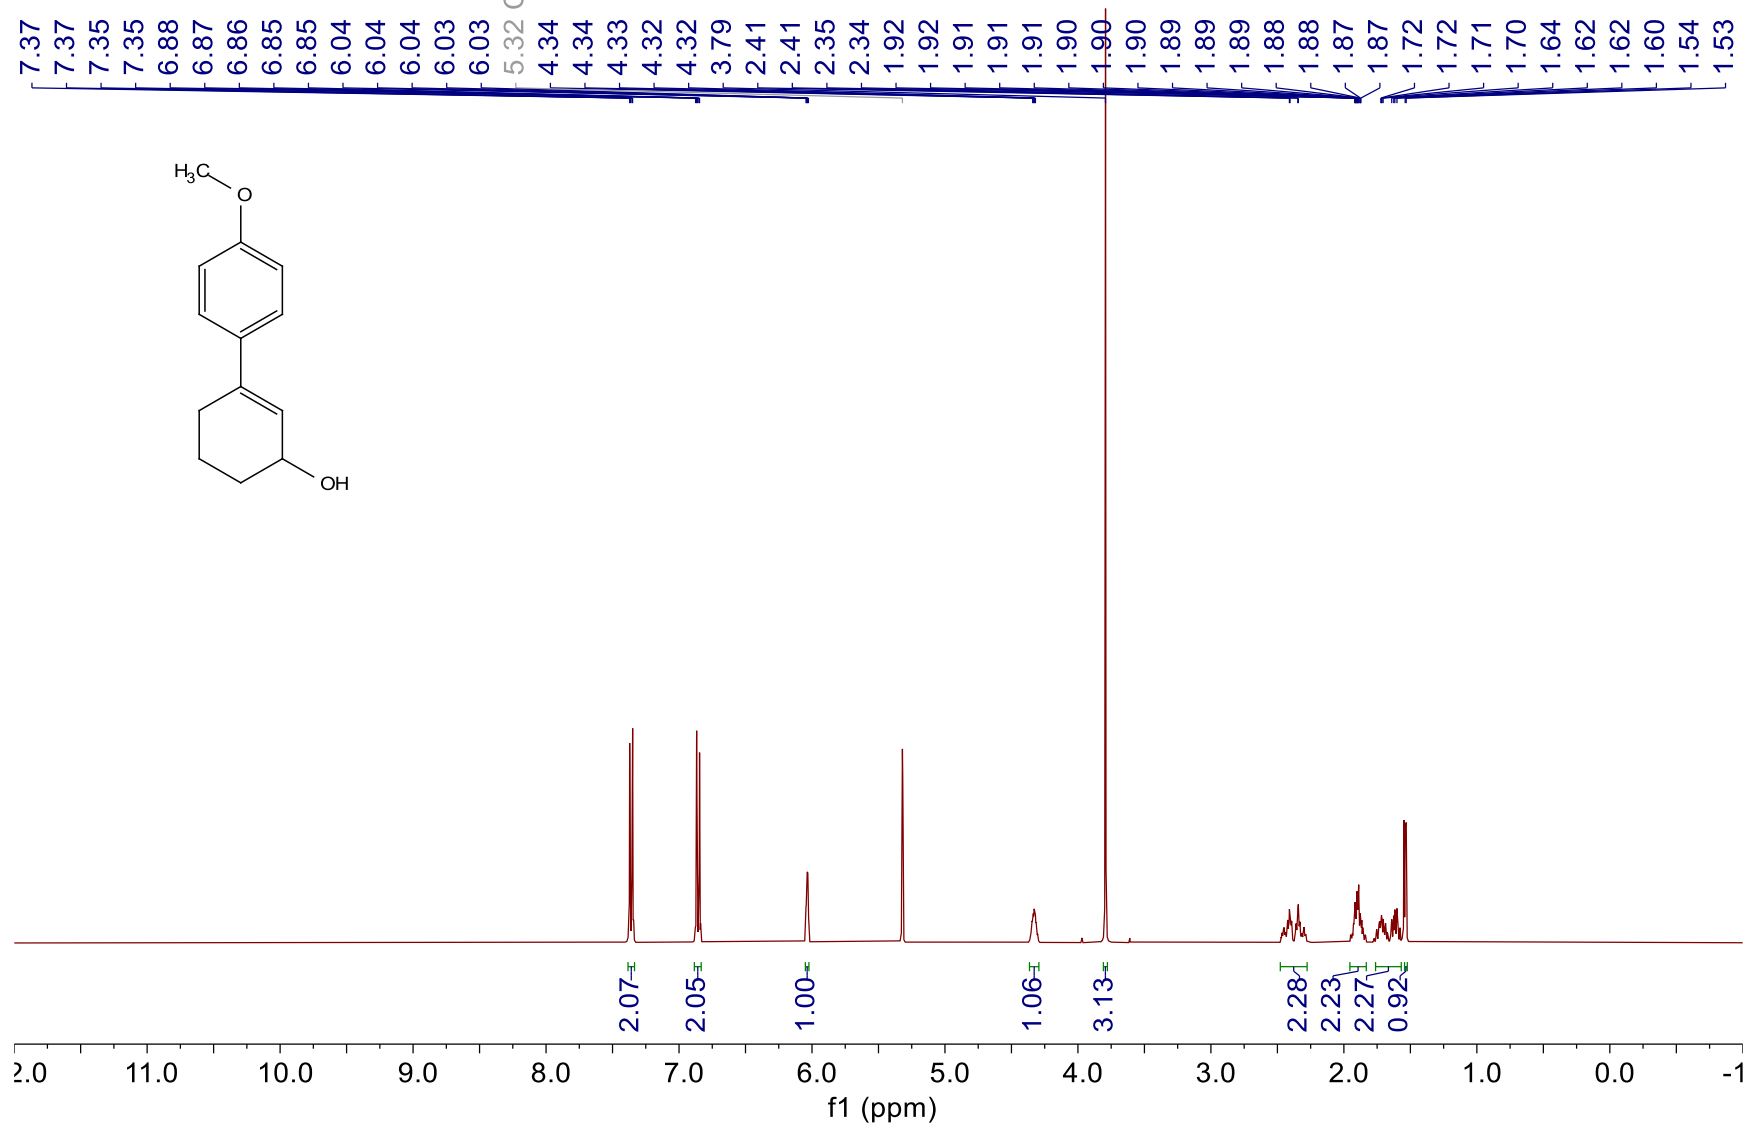

1m 4'-methoxy-3,4,5,6-tetrahydro-[1,1'-biphenyl]-3-ol  
13C NMR at 100.63 MHz in CD2Cl2

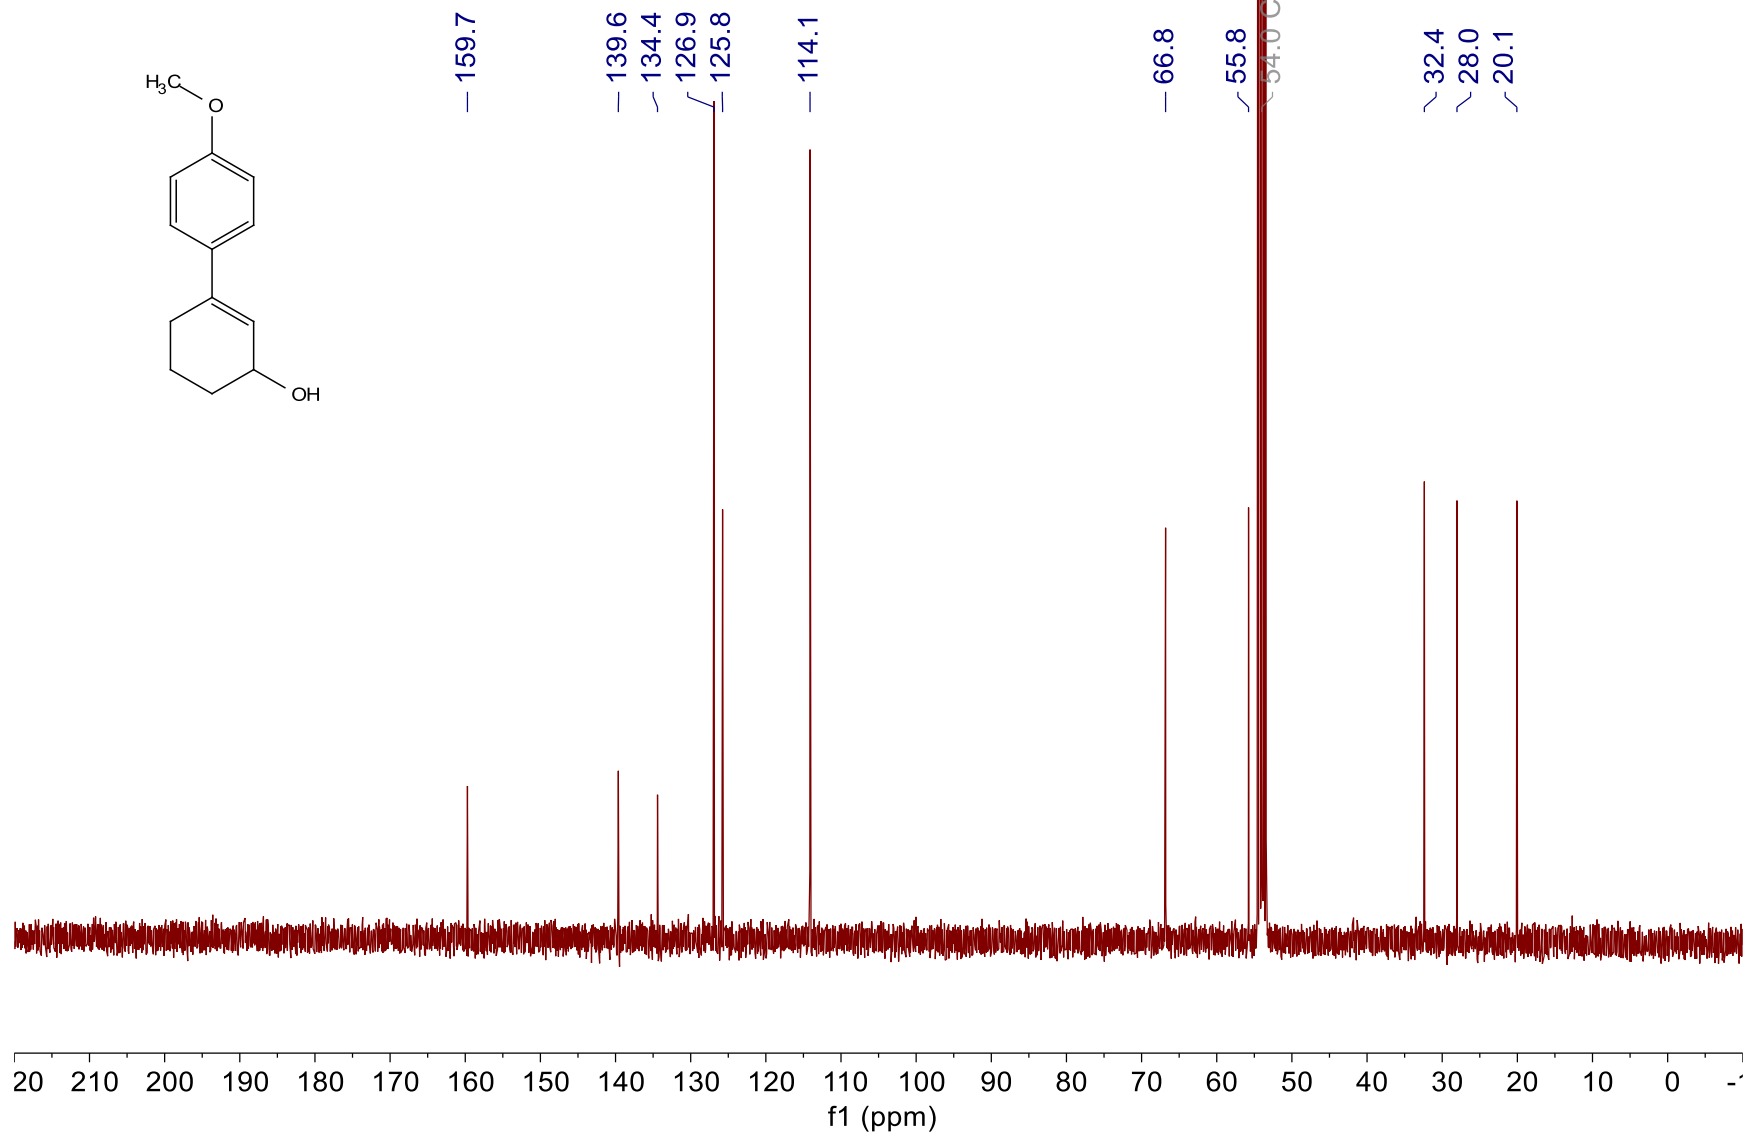



1n 3-(furan-2-yl)cyclohex-2-en-1-ol  
1H NMR at 598.93 MHz in CD3CN

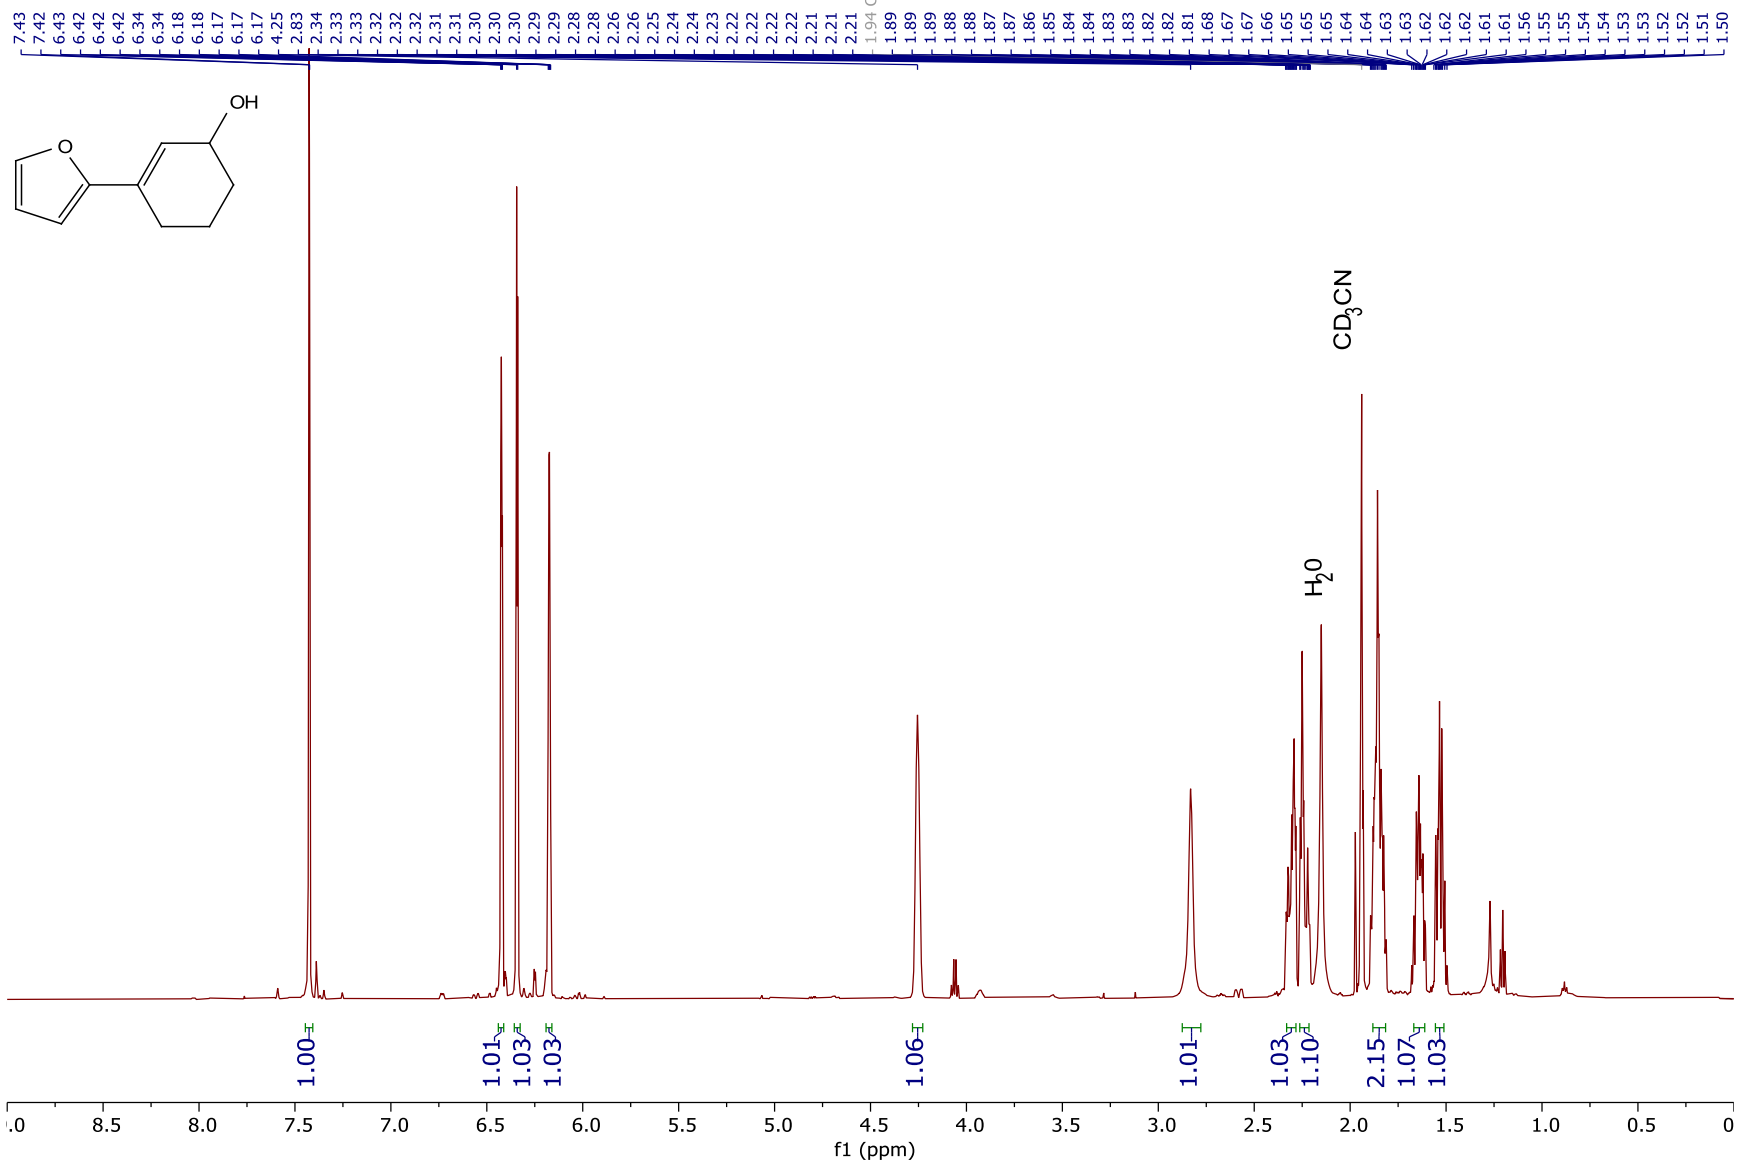

1n 3-(furan-2-yl)cyclohex-2-en-1-ol  
13C NMR at 150.62 MHz in CD3CN

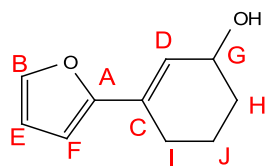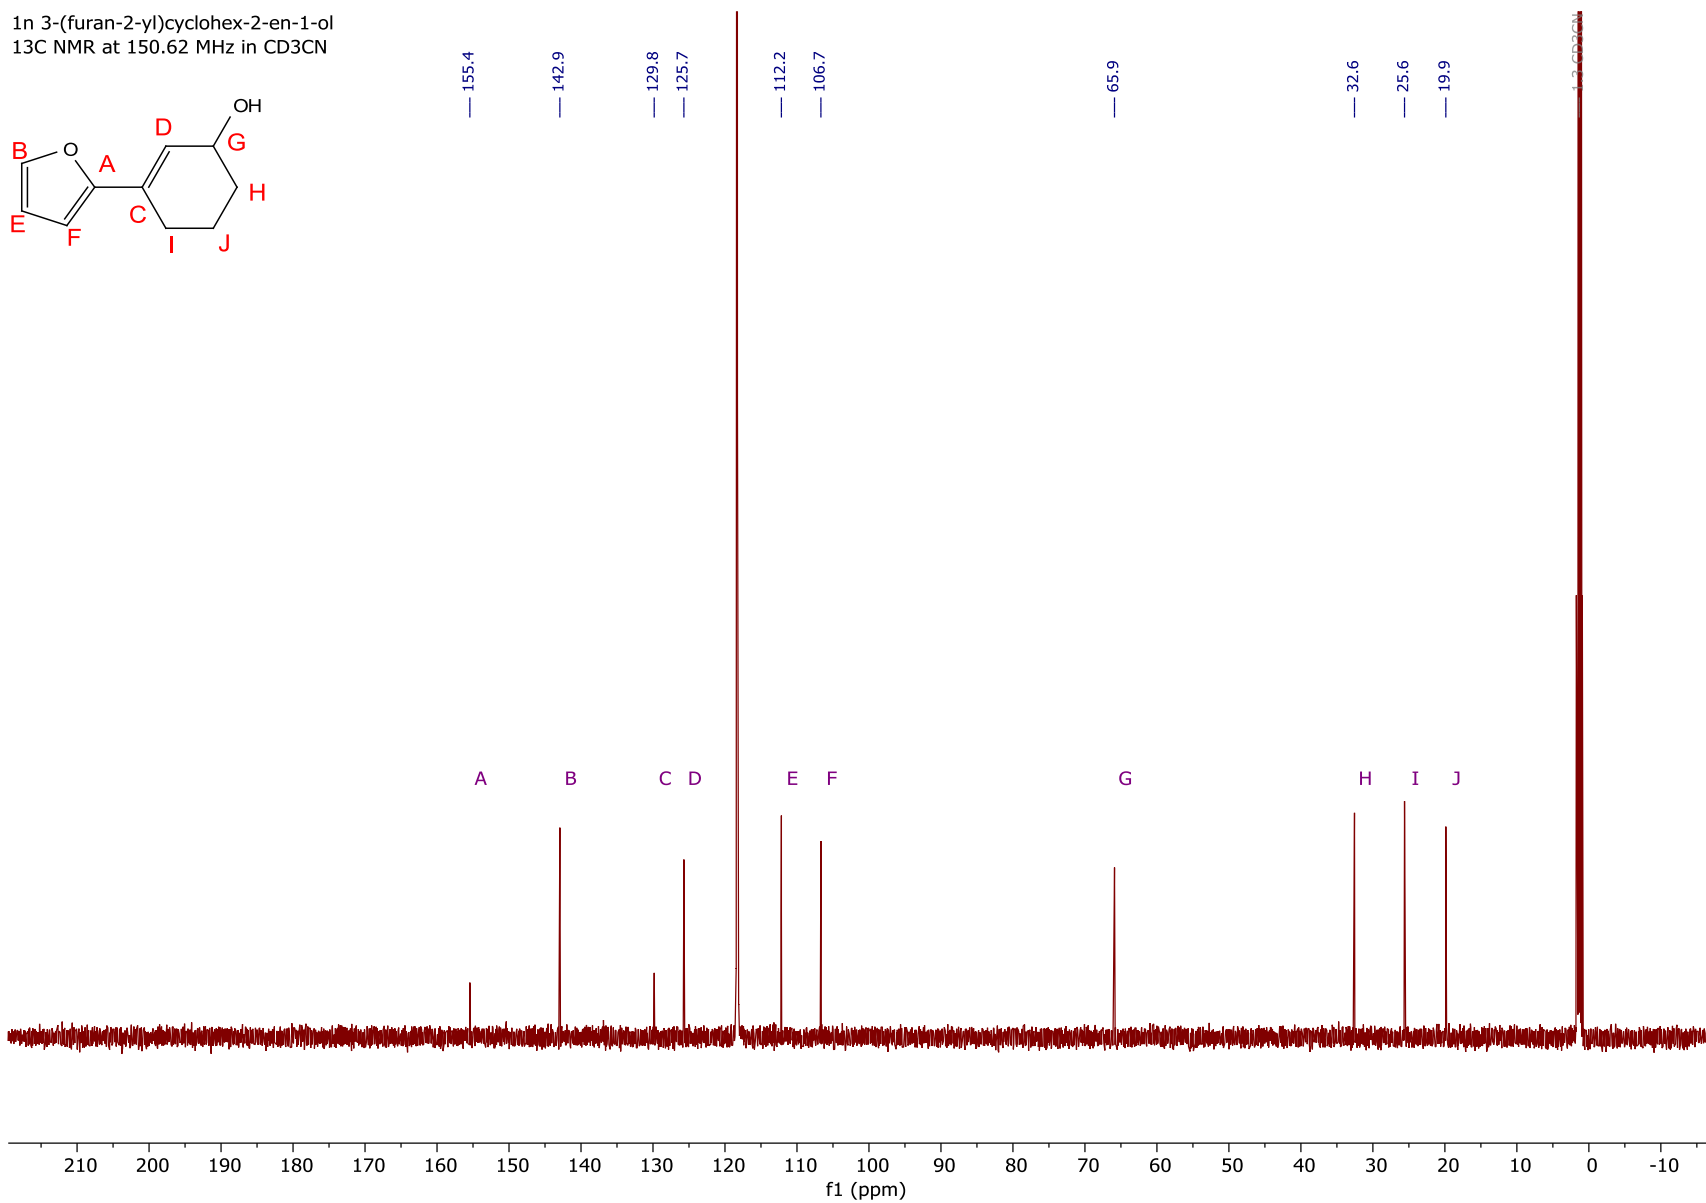

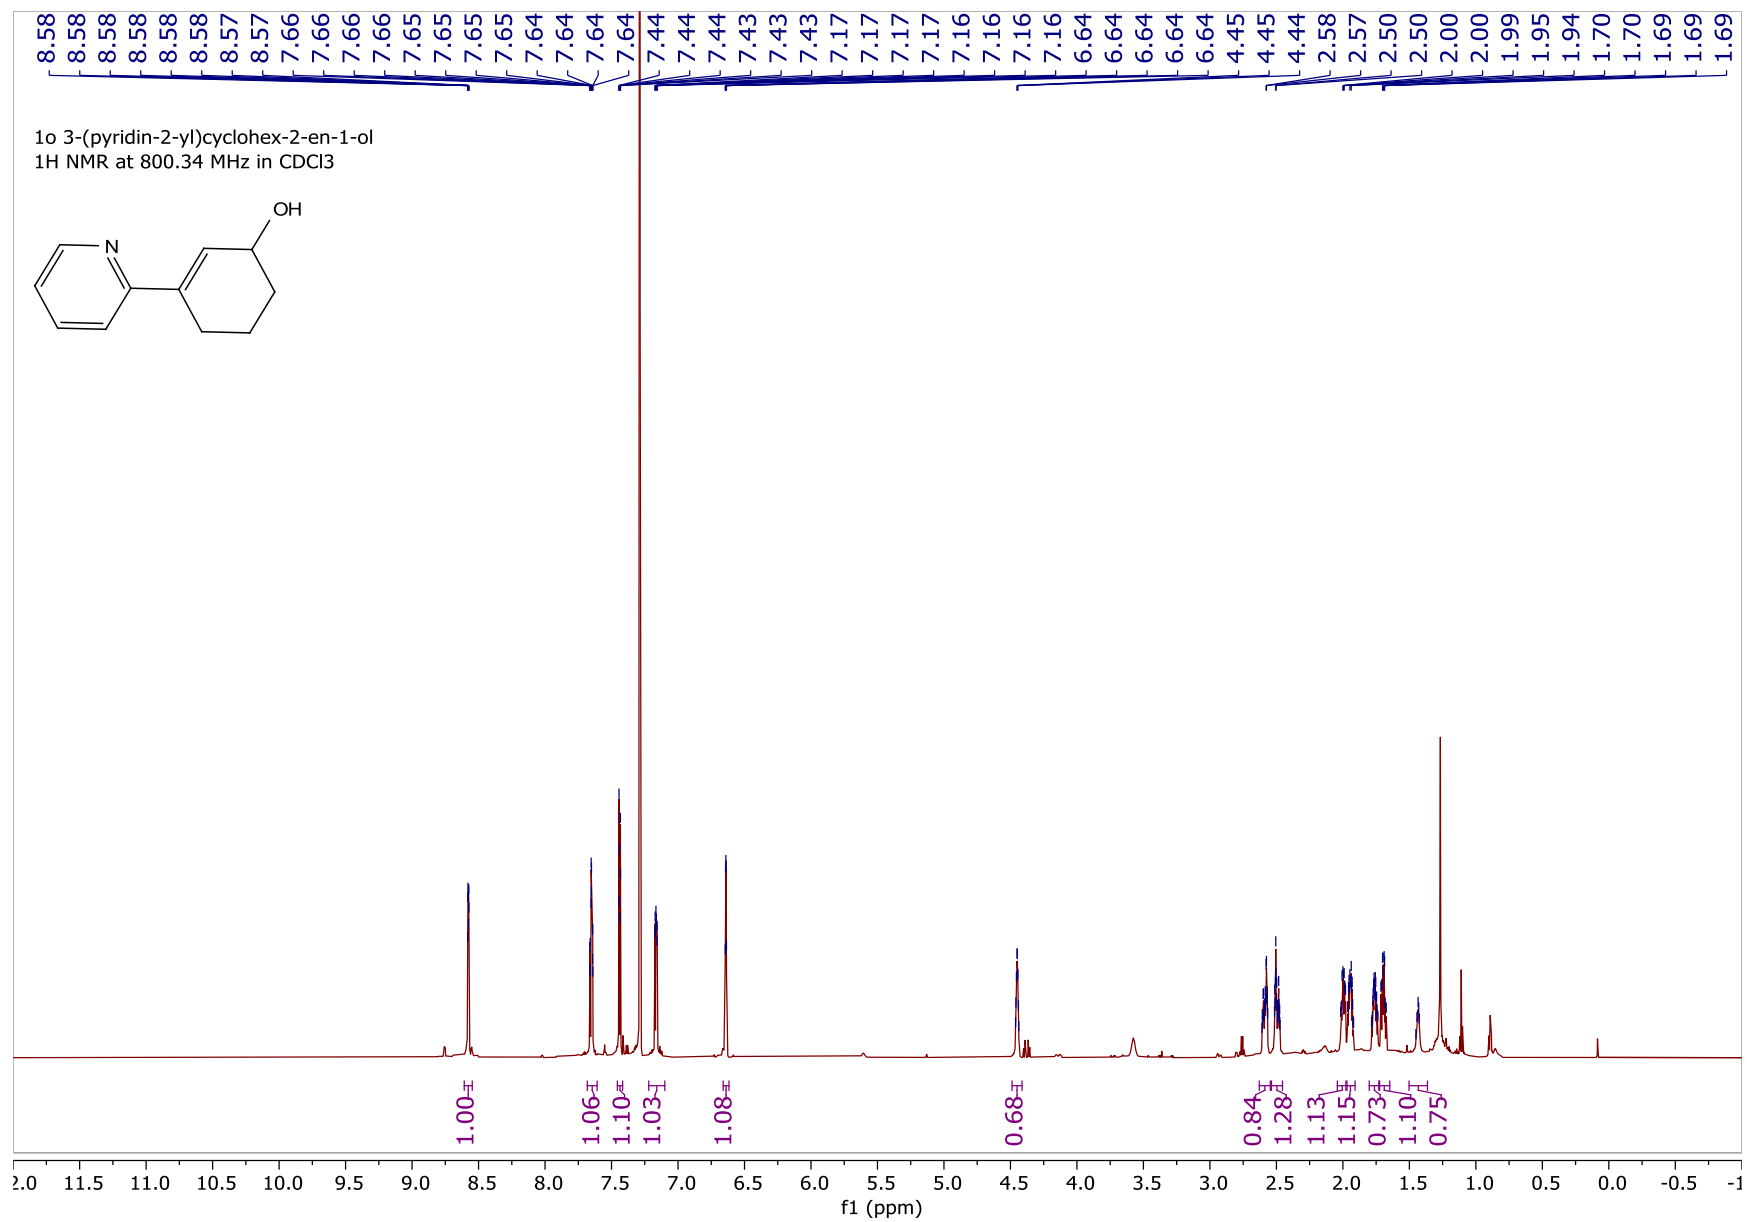



1p 1,3-dibutylcyclohex-2-en-1-ol  
1H NMR at 400.15 MHz in CDCl3

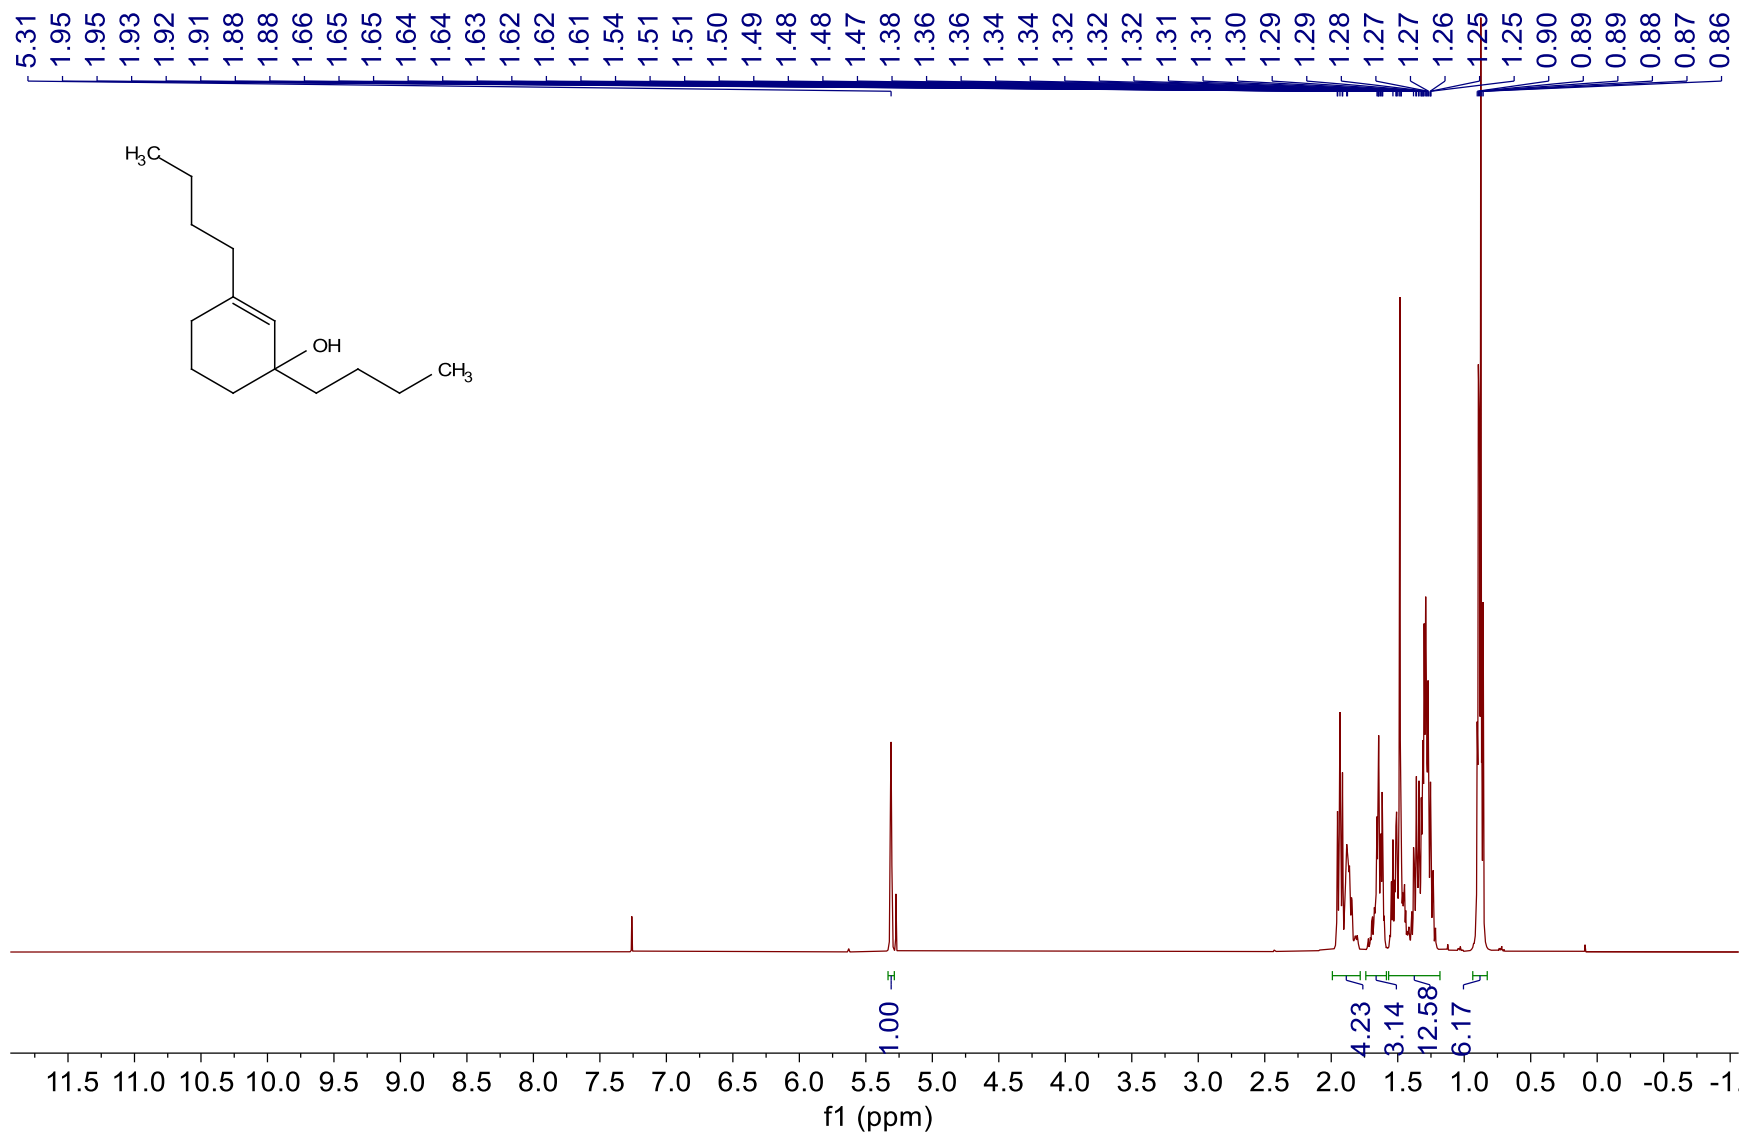

1p 1,3-dibutylcyclohex-2-en-1-ol  
13C NMR at 100.63 MHz in CDCl3

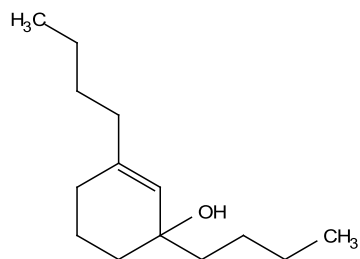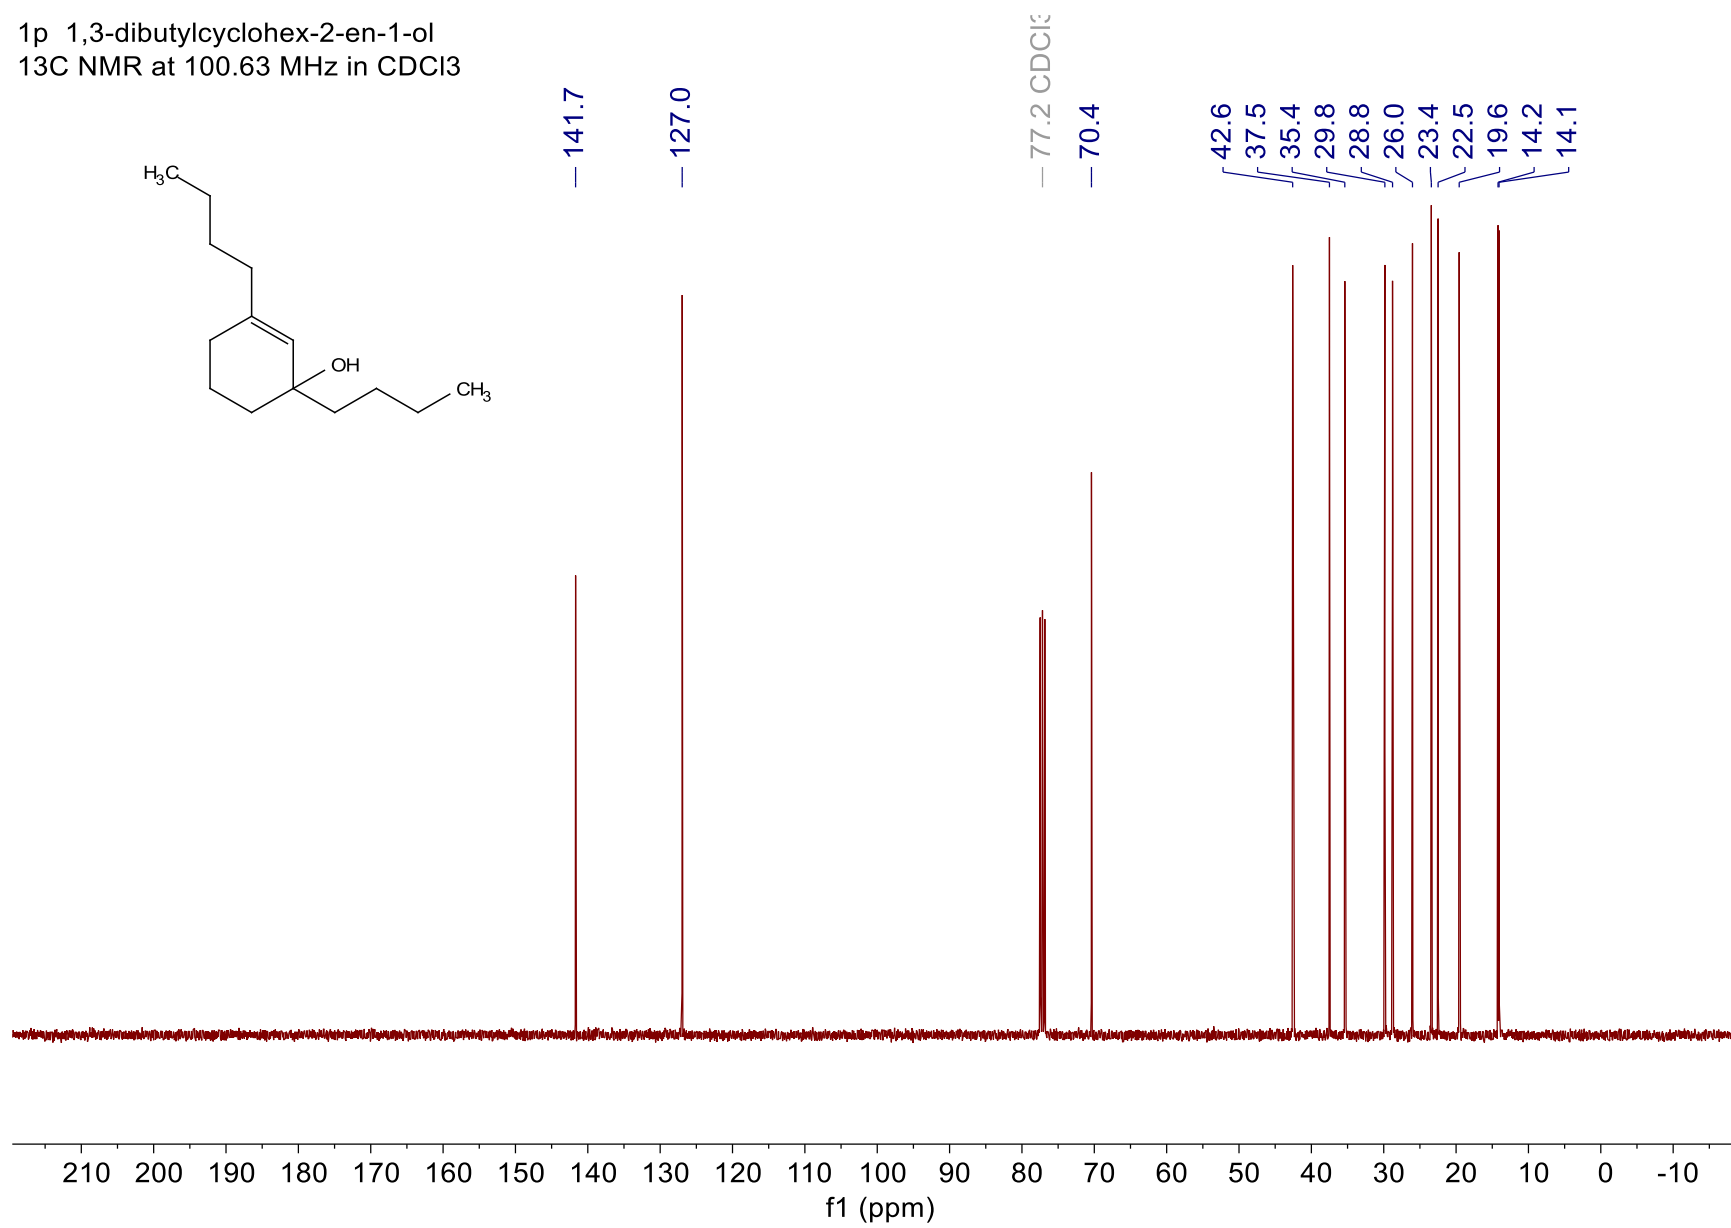

1q 3-hydroxycyclohex-1-ene-1-carbonitrile  
1H NMR at 400.15 MHz in CD3CN

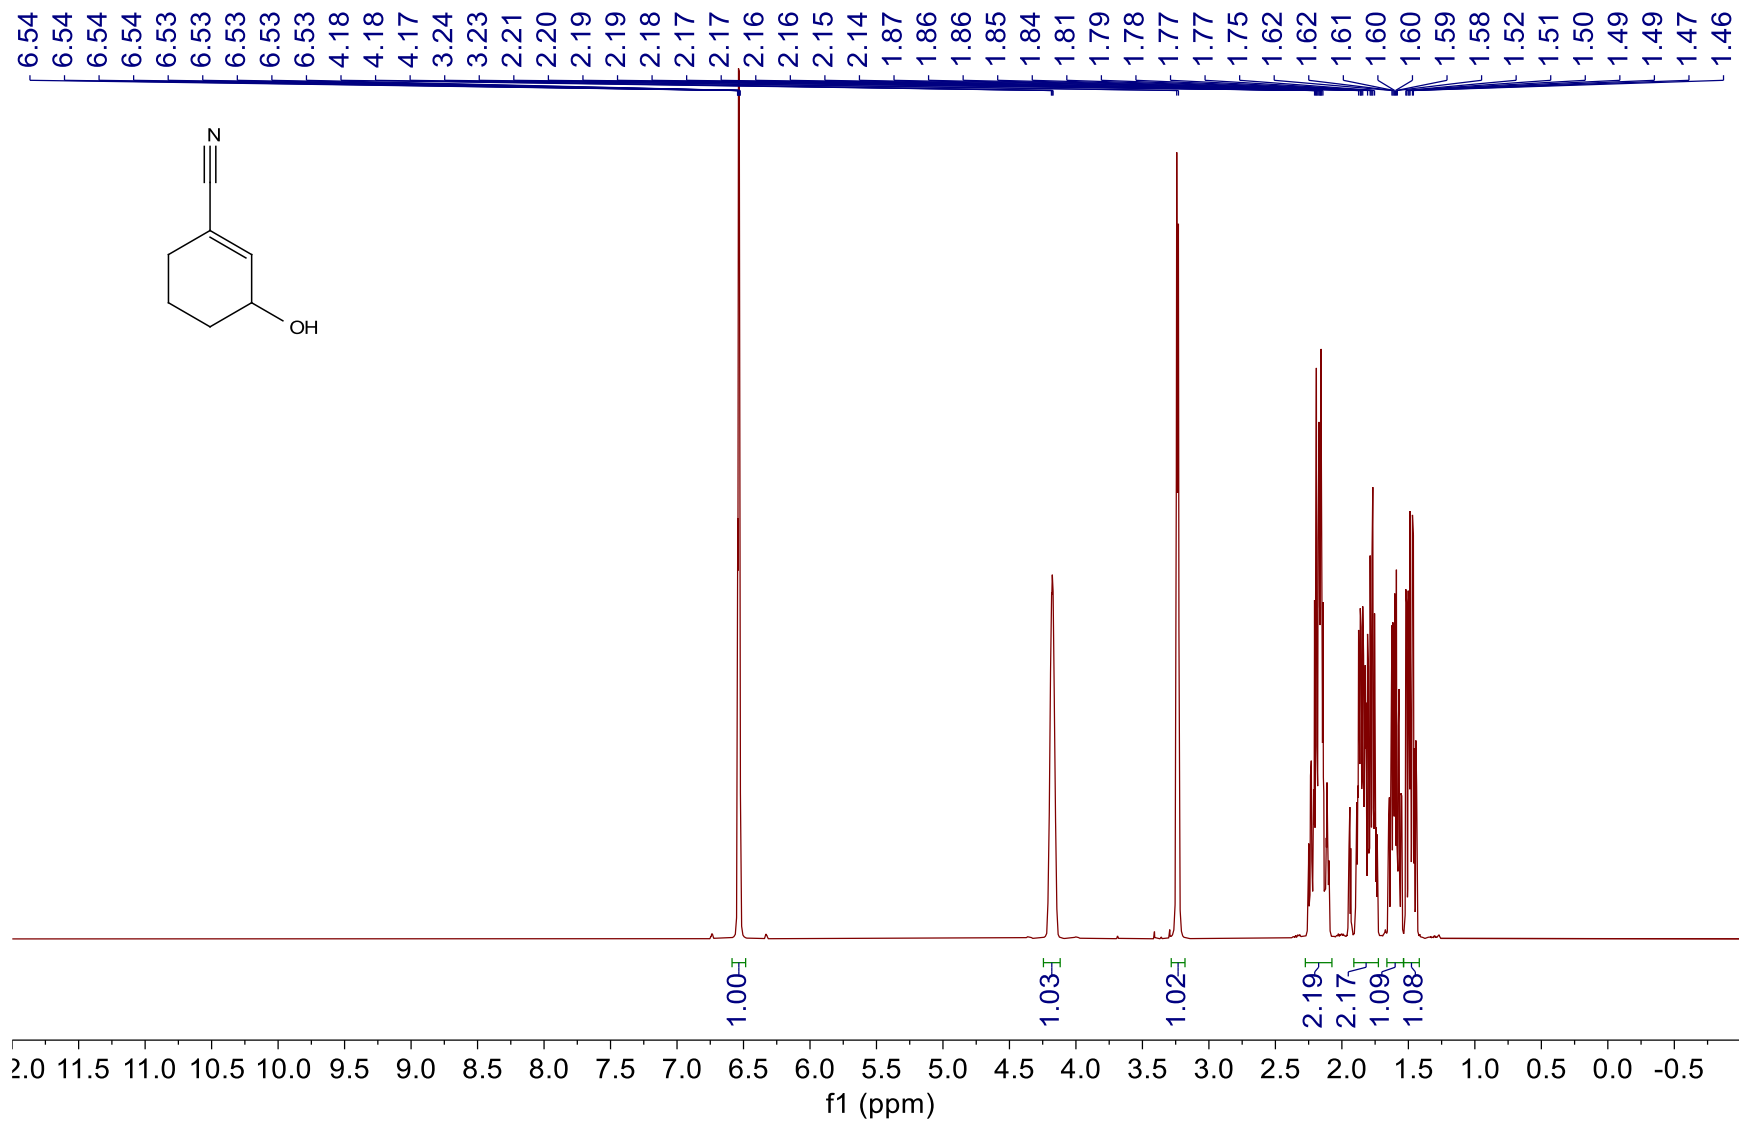

1q 3-hydroxycyclohex-1-ene-1-carbonitrile  
13C NMR at 100.63 MHz in CD3CN

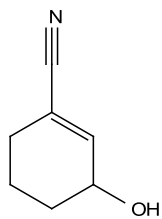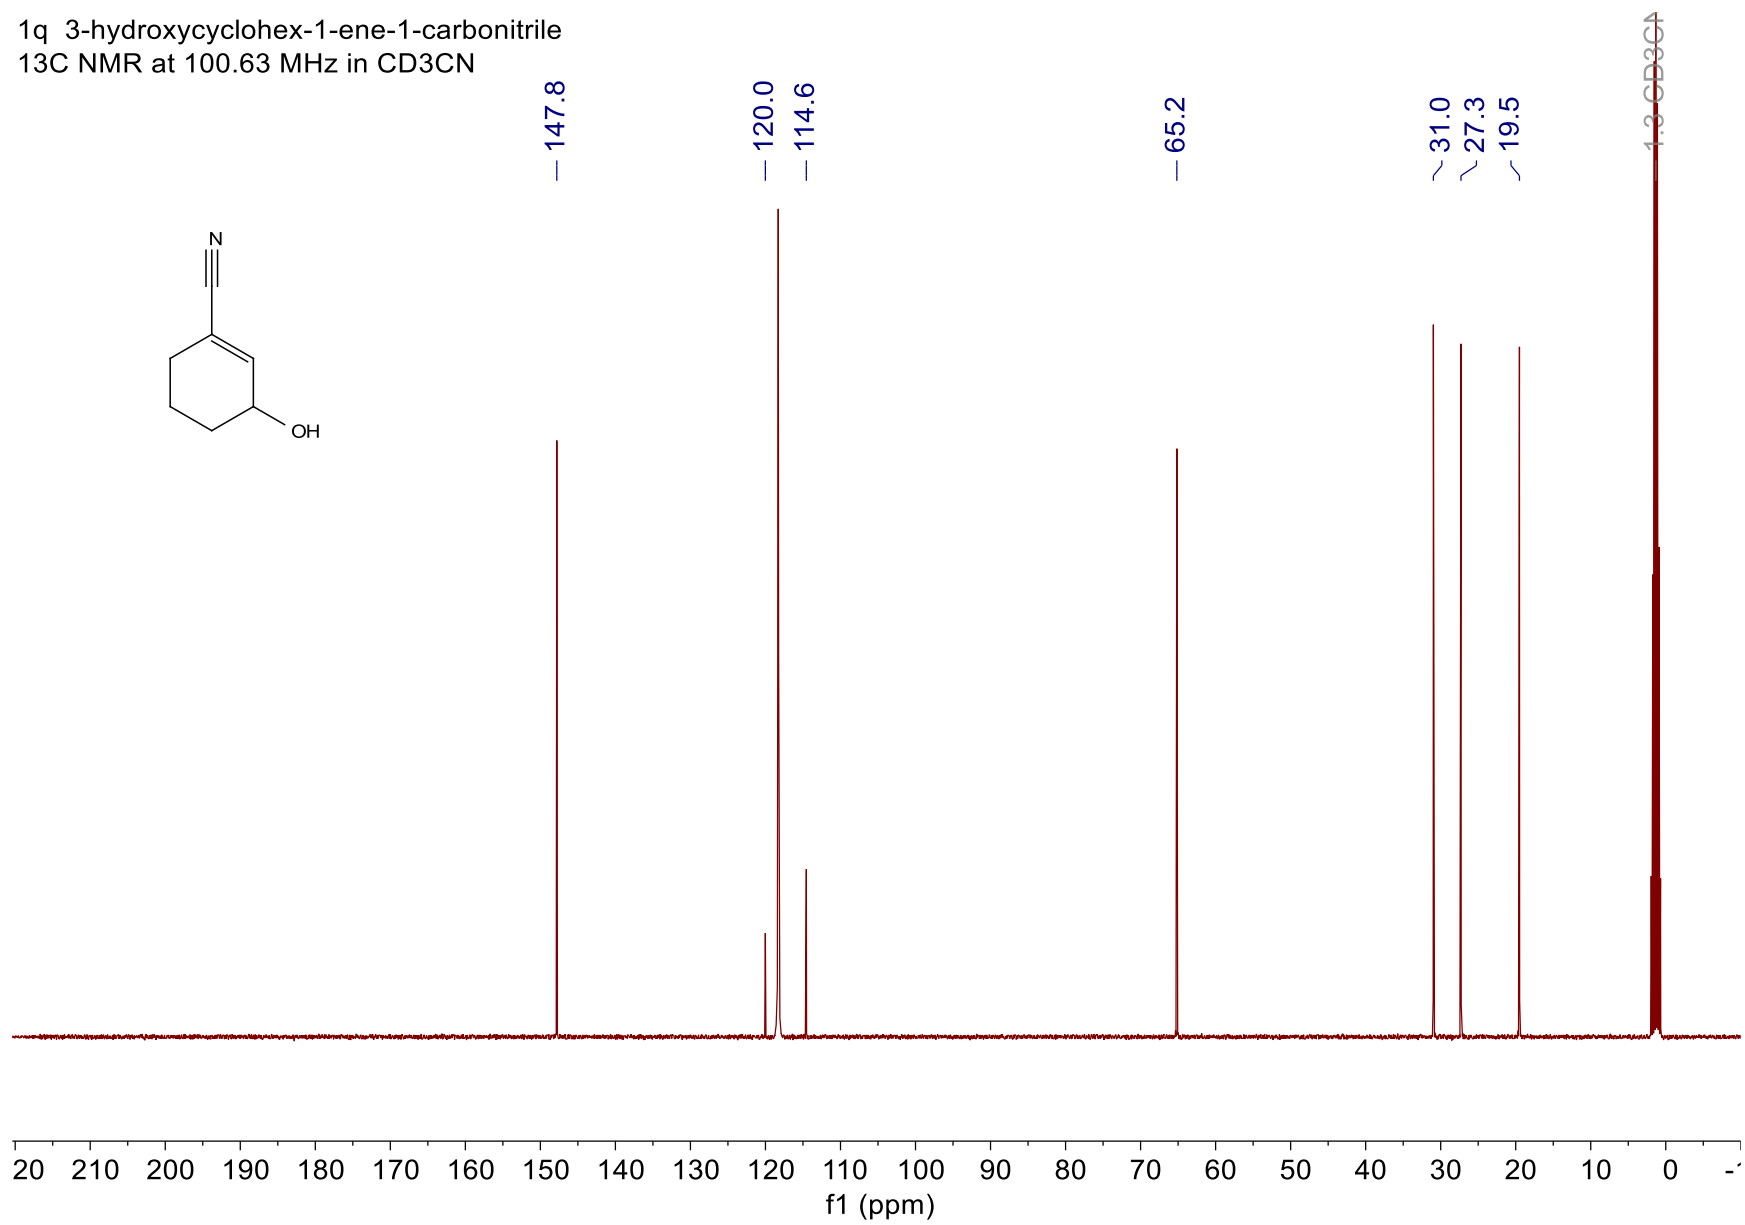



# 1q 3-hydroxycyclohex-1-ene-1-carbonitrile

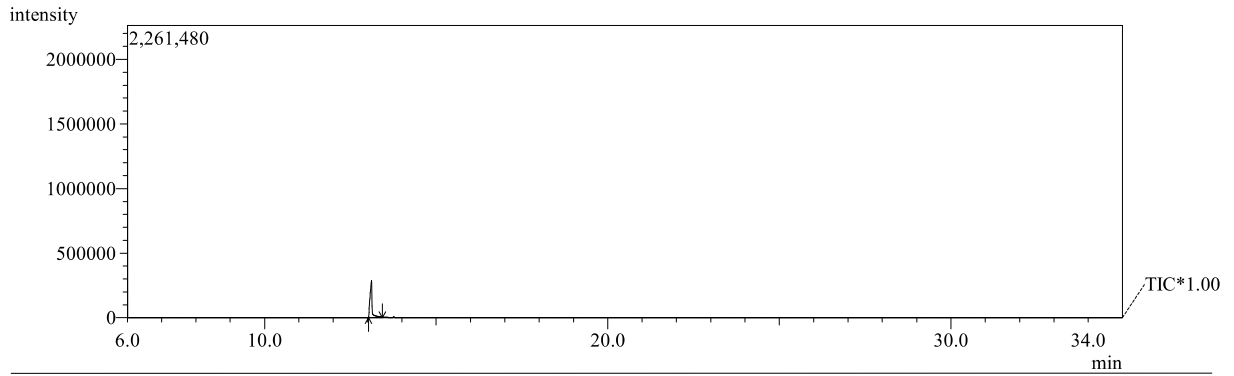

MassPeaks:13  
RawMode:Averaged 13.1-13.1(854-856) BasePeak:123(93693)  
BG Mode:Calc. from Peak

M+

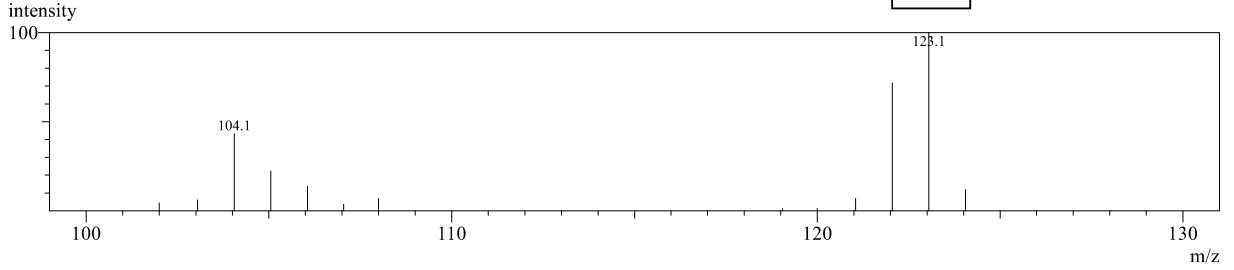

1r 4''-methoxy-4-(trifluoromethyl)-5',6'-dihydro-[1,1':3',1''-terphenyl]-1'(4'H)-ol  
1H NMR at 400.15 MHz in CDCl3

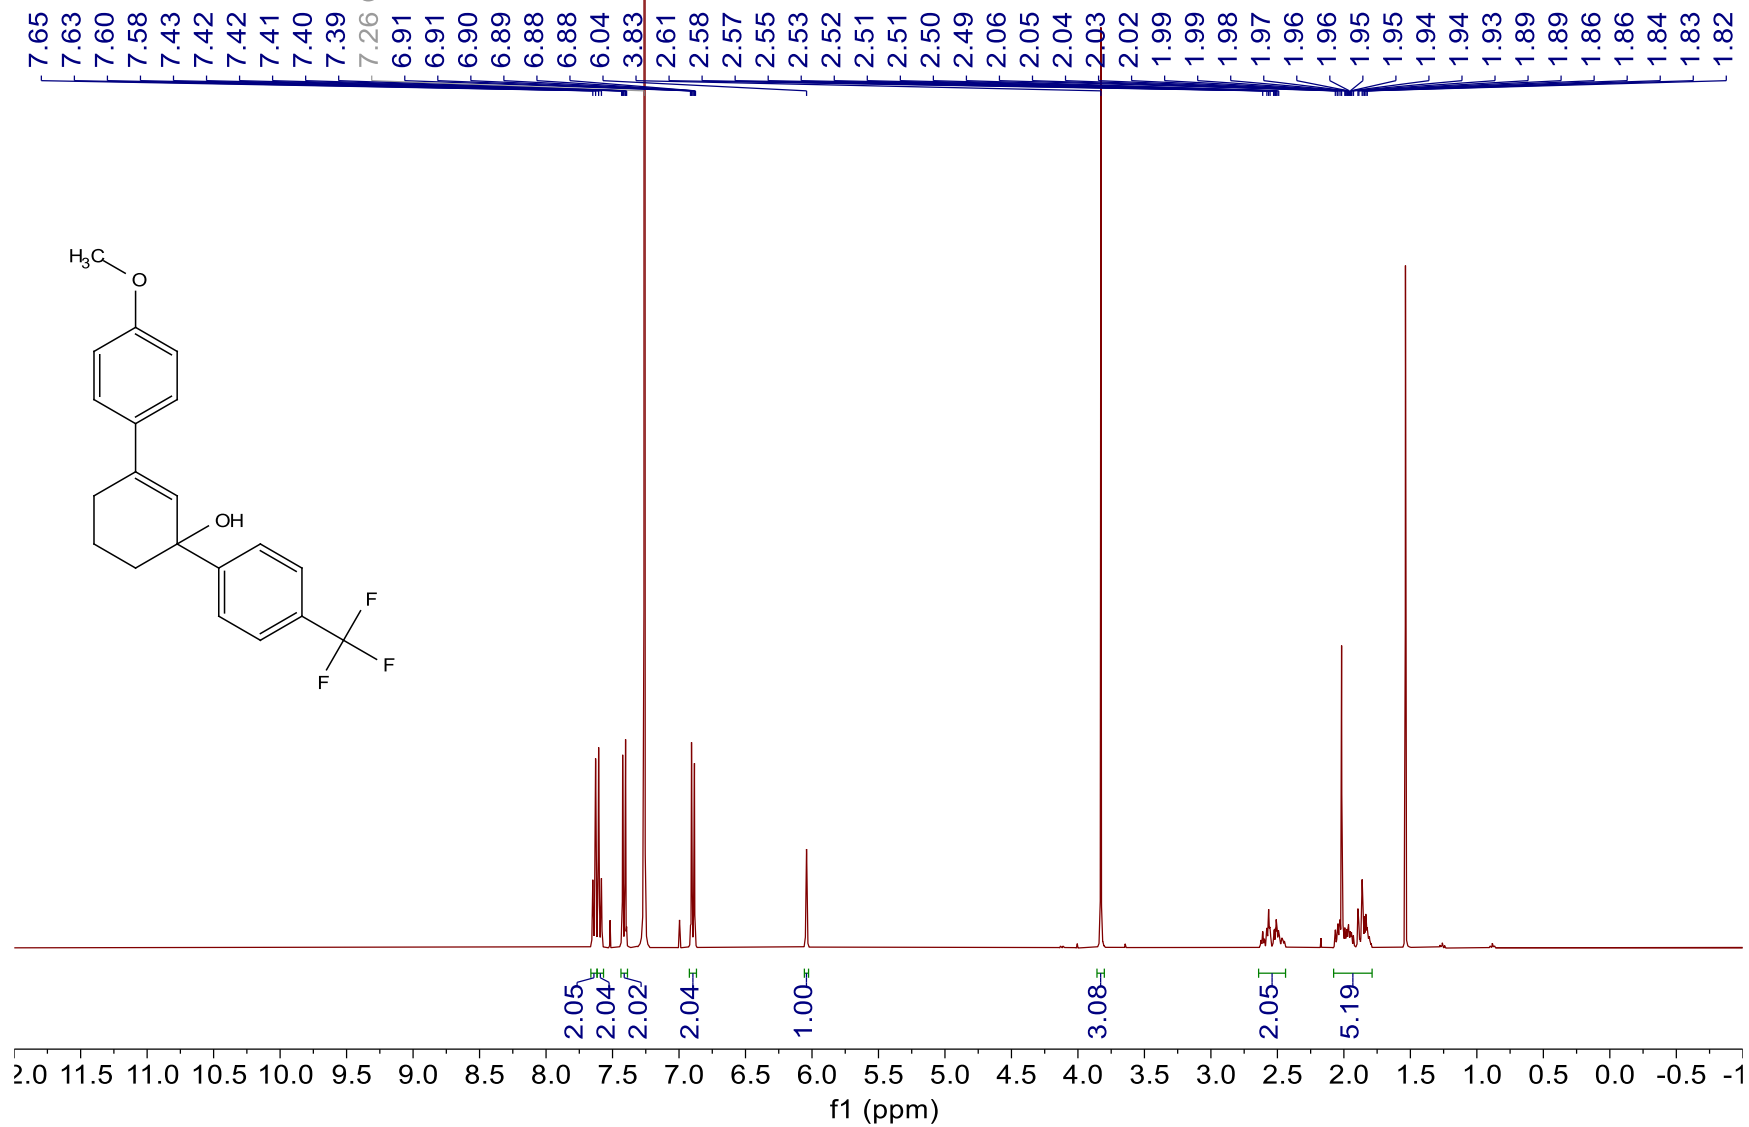

1r 4''-methoxy-4-(trifluoromethyl)-5',6'-dihydro-[1,1':3',1''-terphenyl]-1'(4'H)-ol  
19F NMR at 376.48 MHz in CDCl3

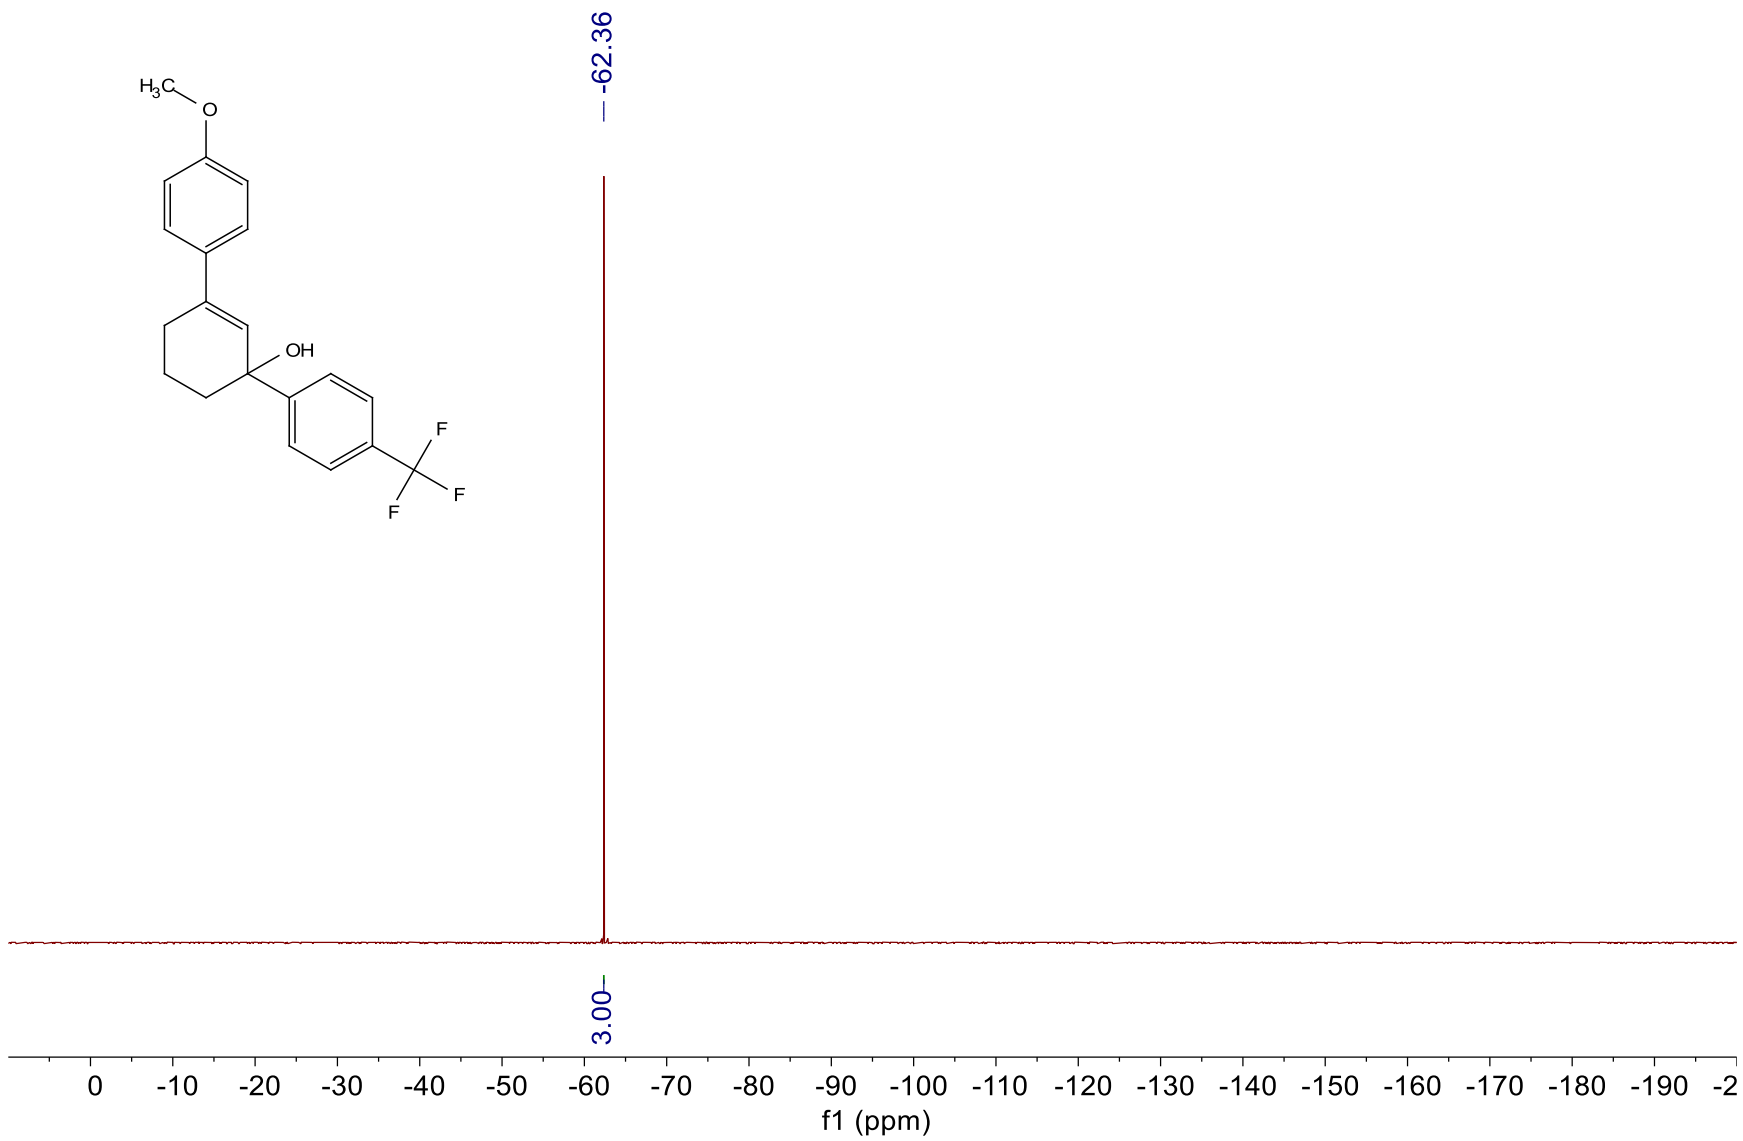

1r 4''-methoxy-4-(trifluoromethyl)-5',6'-dihydro-[1,1':3,1''-terphenyl]-1'(4'H)-ol  
13C NMR at 100.63 MHz in CDCl3

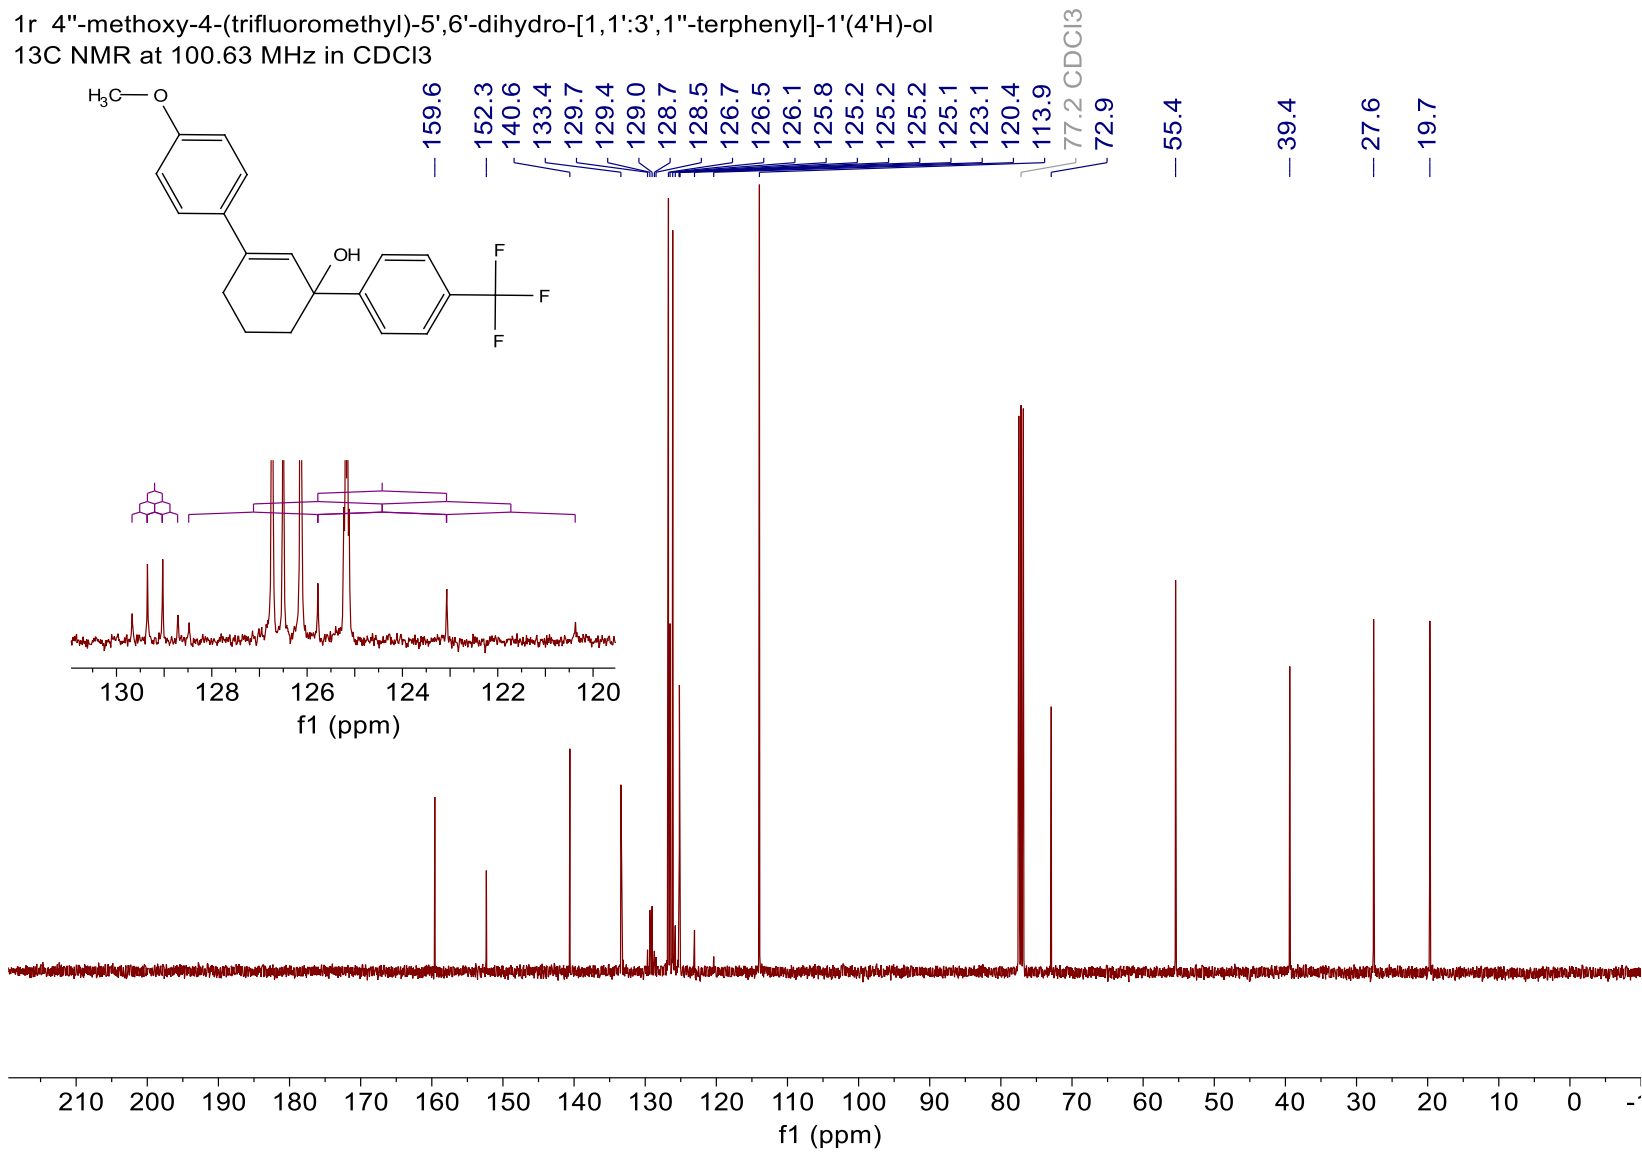

1s 4-methoxy-4''-(trifluoromethyl)-5',6'-dihydro-[1,1':3',1''-terphenyl]-1'(4'H)-ol  
1H NMR at 400.15 MHz in CD3CN

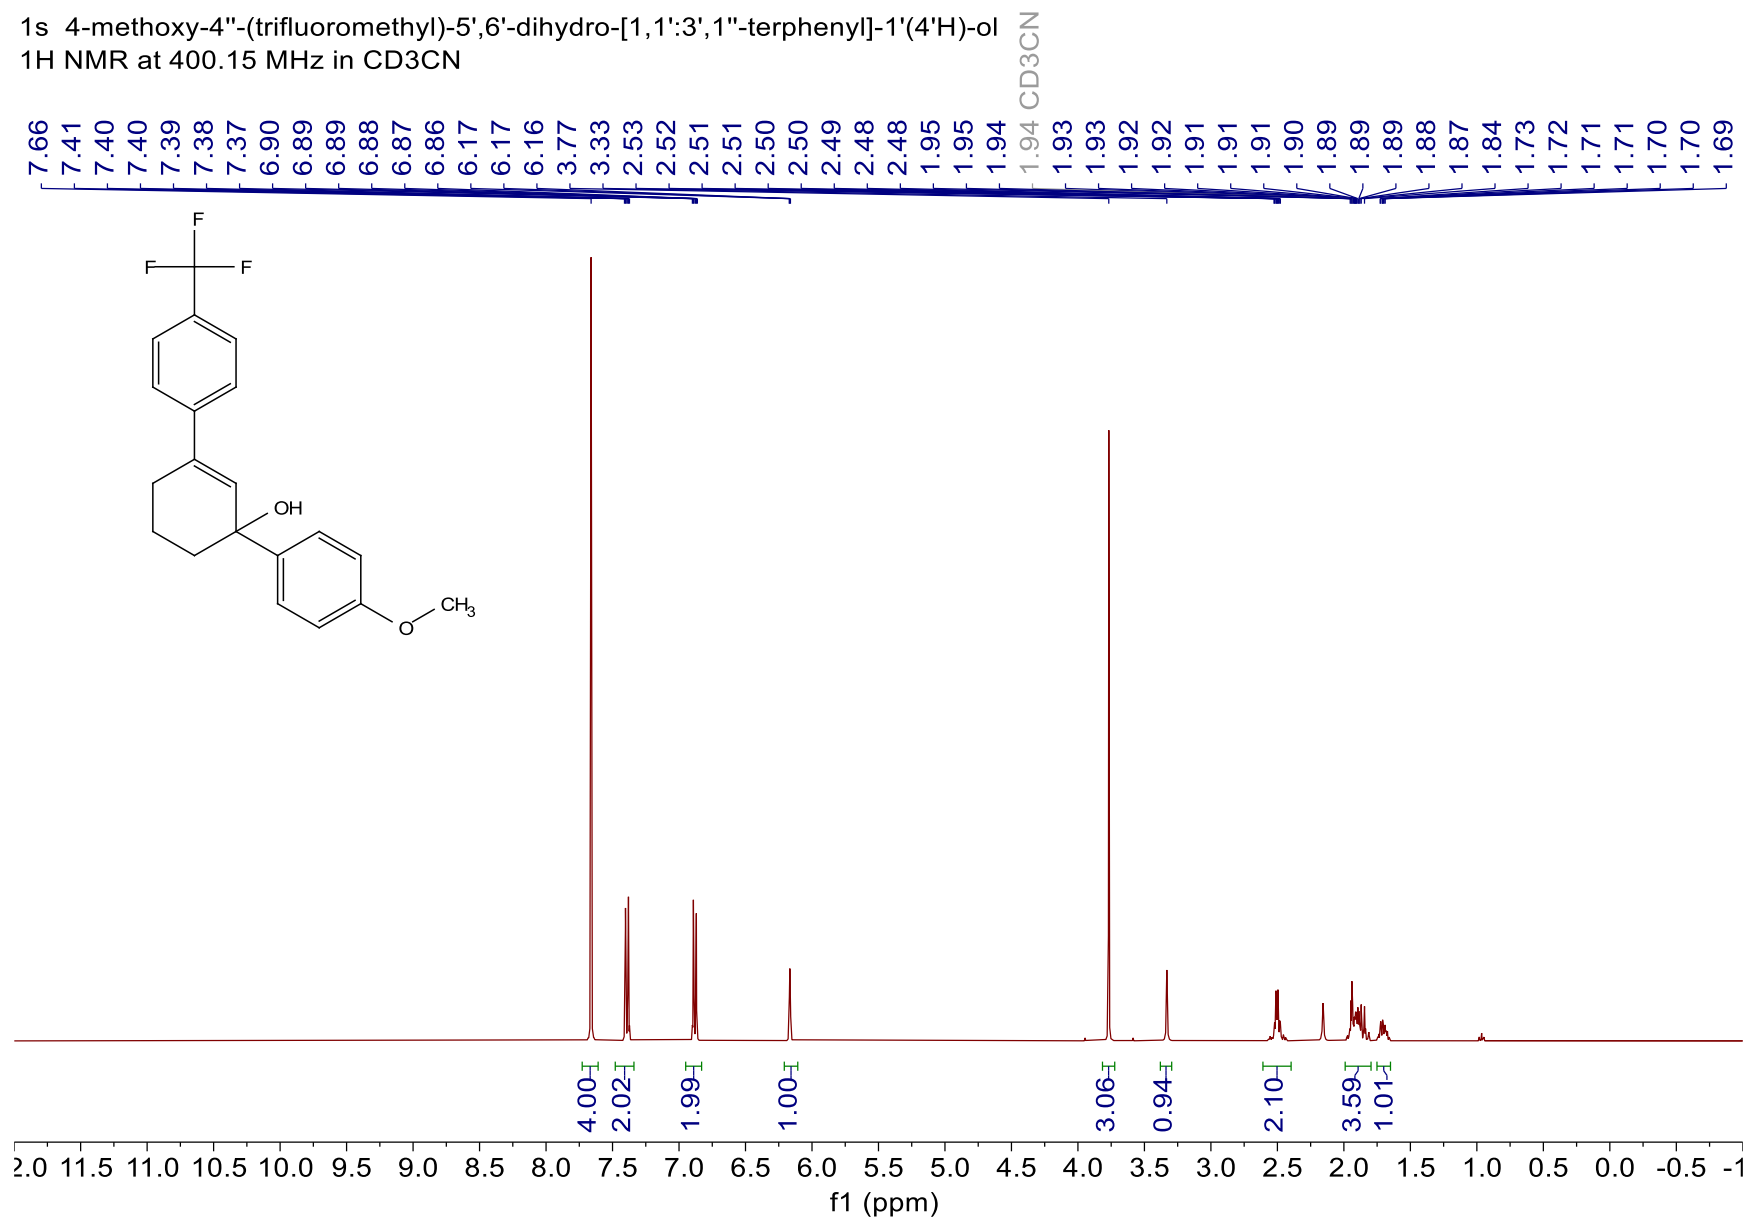

1s 4-methoxy-4''-(trifluoromethyl)-5',6'-dihydro-[1,1':3',1''-terphenyl]-1'(4'H)-ol  
19F NMR at 376.48 MHz in CD3CN

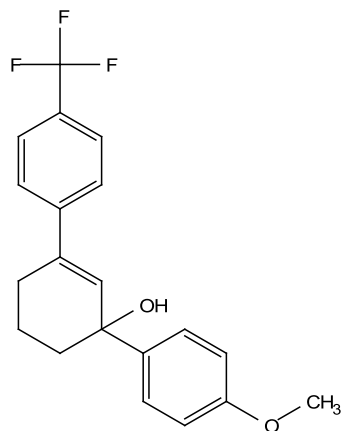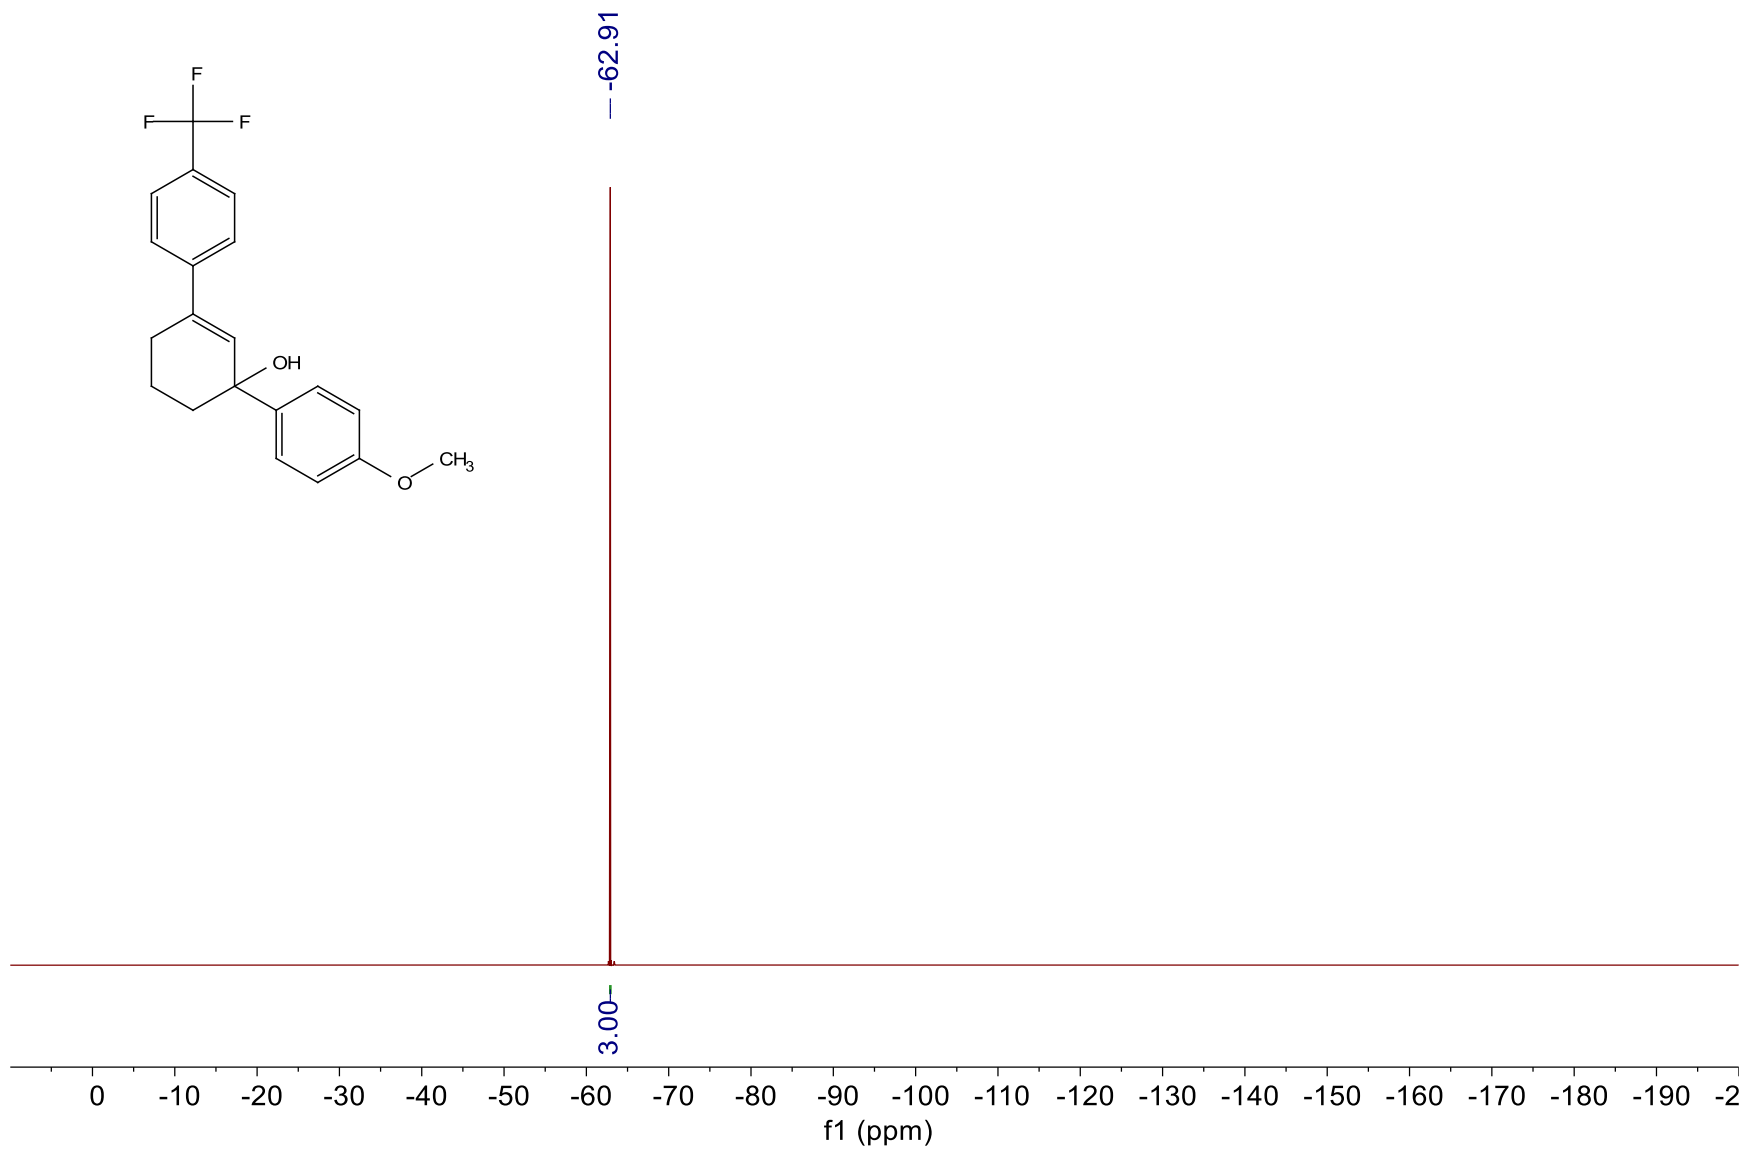

1s 4-methoxy-4''-(trifluoromethyl)-5',6'-dihydro-[1,1':3',1''-terphenyl]-1'(4'H)-ol  
13C NMR at 100.63 MHz in CD3CN

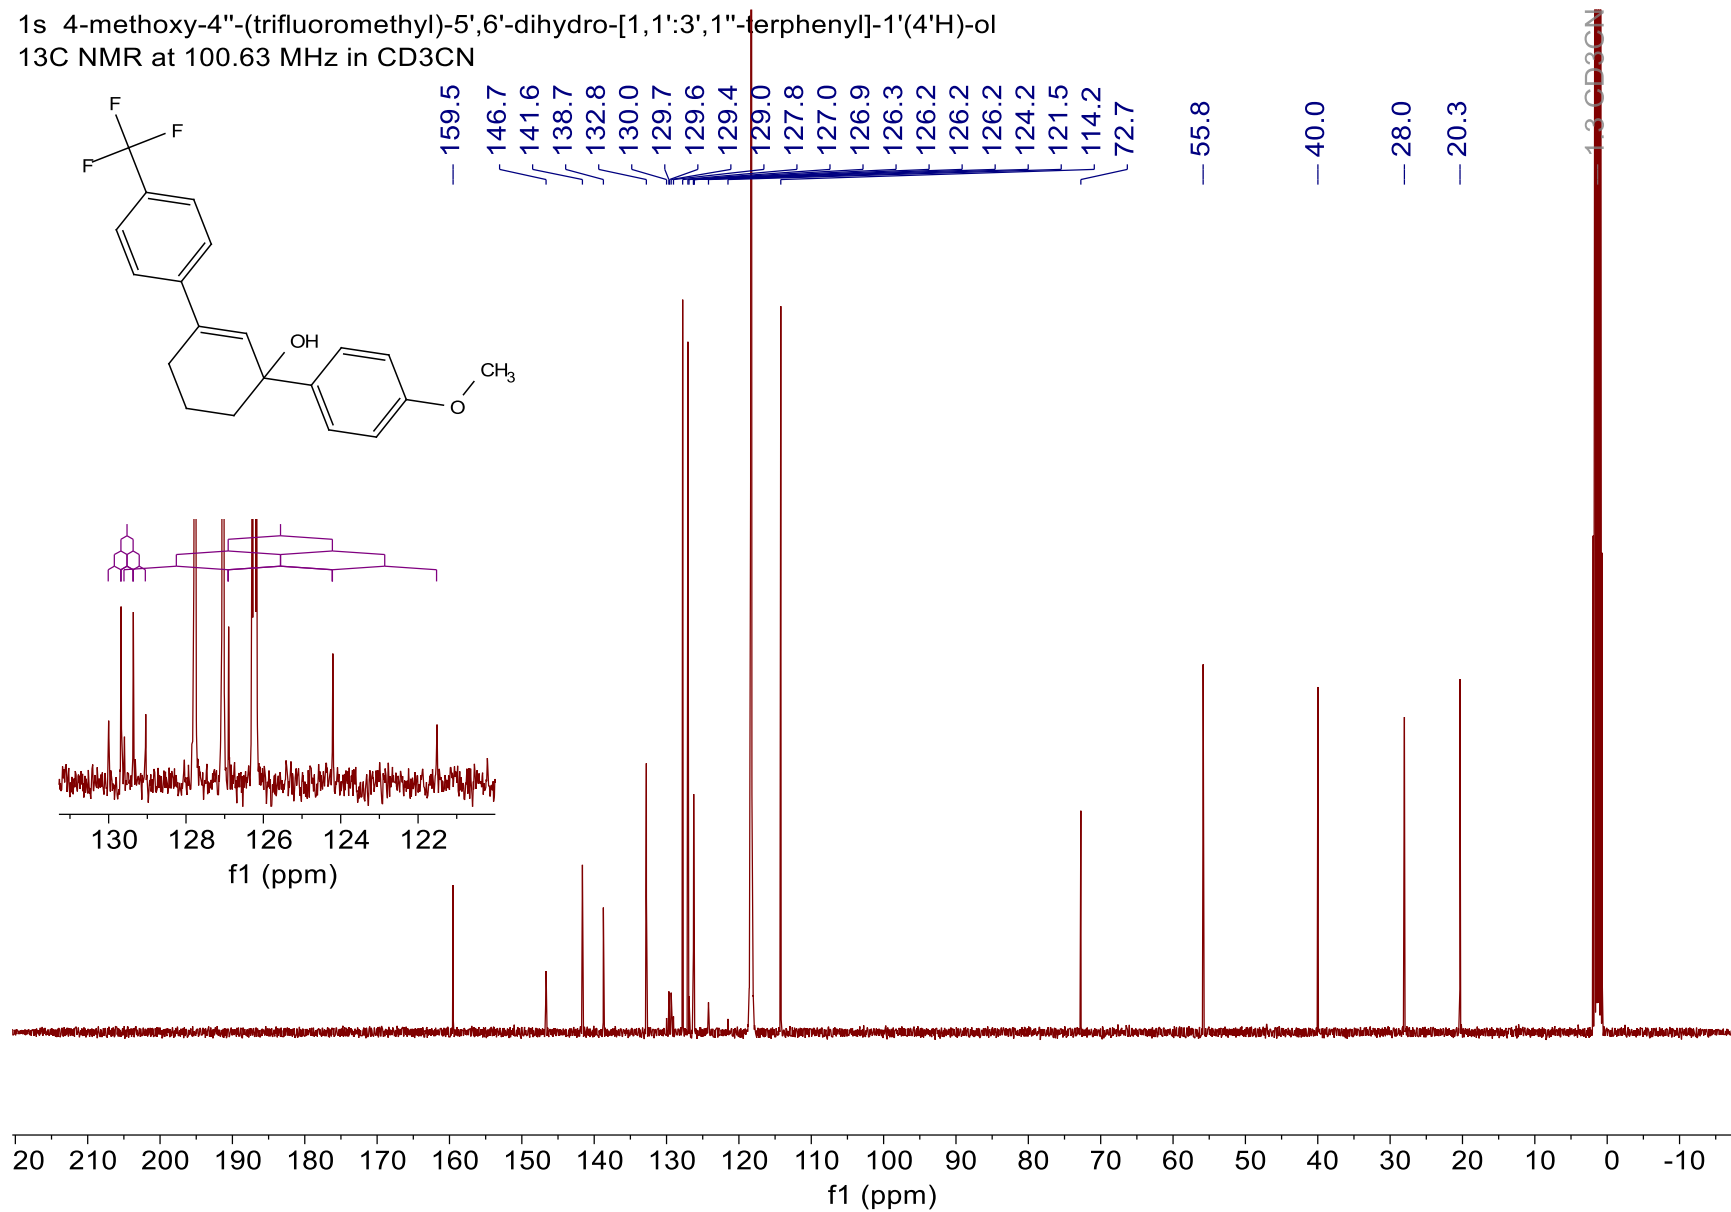

2a 1,5-bis(4-(trifluoromethyl)phenyl)hex-5-en-1-one  
1H NMR at 400.15 MHz in CD3CN

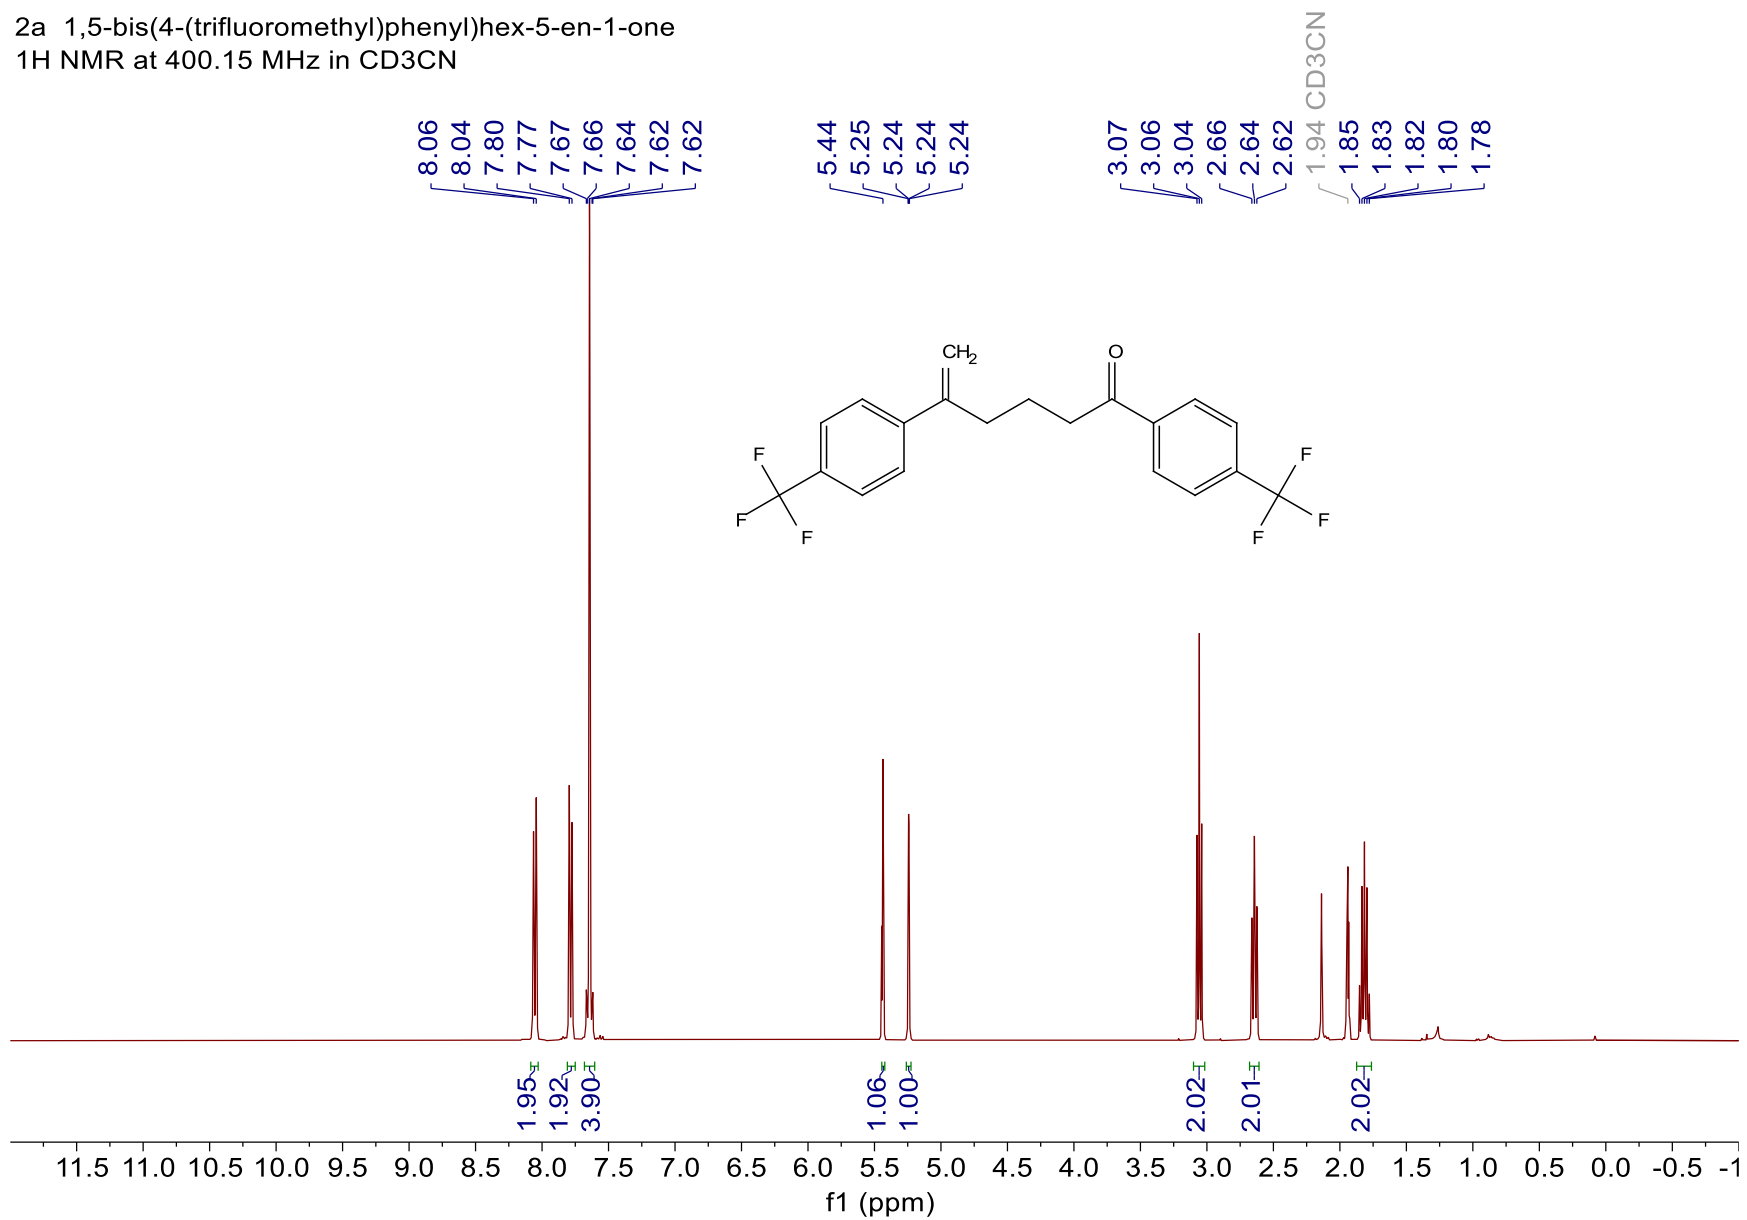



2a 1,5-bis(4-(trifluoromethyl)phenyl)hex-5-en-1-one  
19F NMR at 376.48 MHz in CD3CN

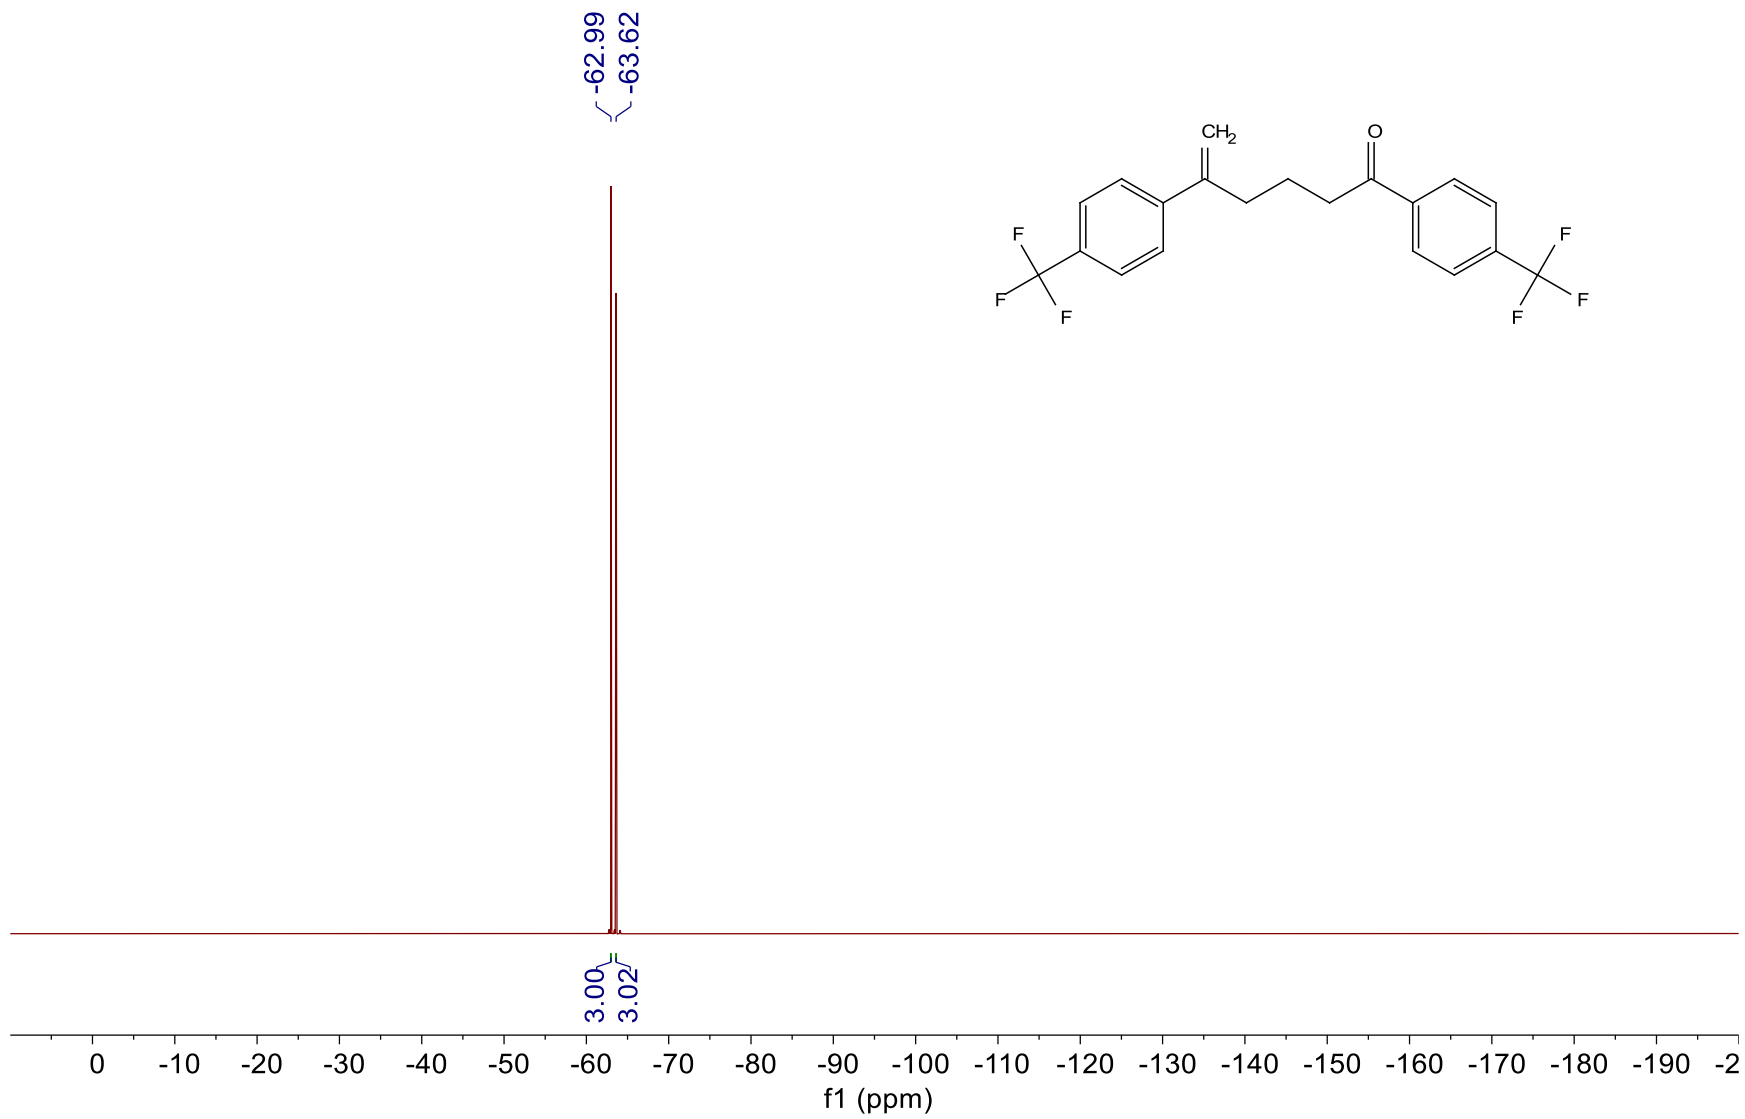

2a 1,5-bis(4-(trifluoromethyl)phenyl)hex-5-en-1-one  
13C NMR at 100.63 MHz in CD3CN

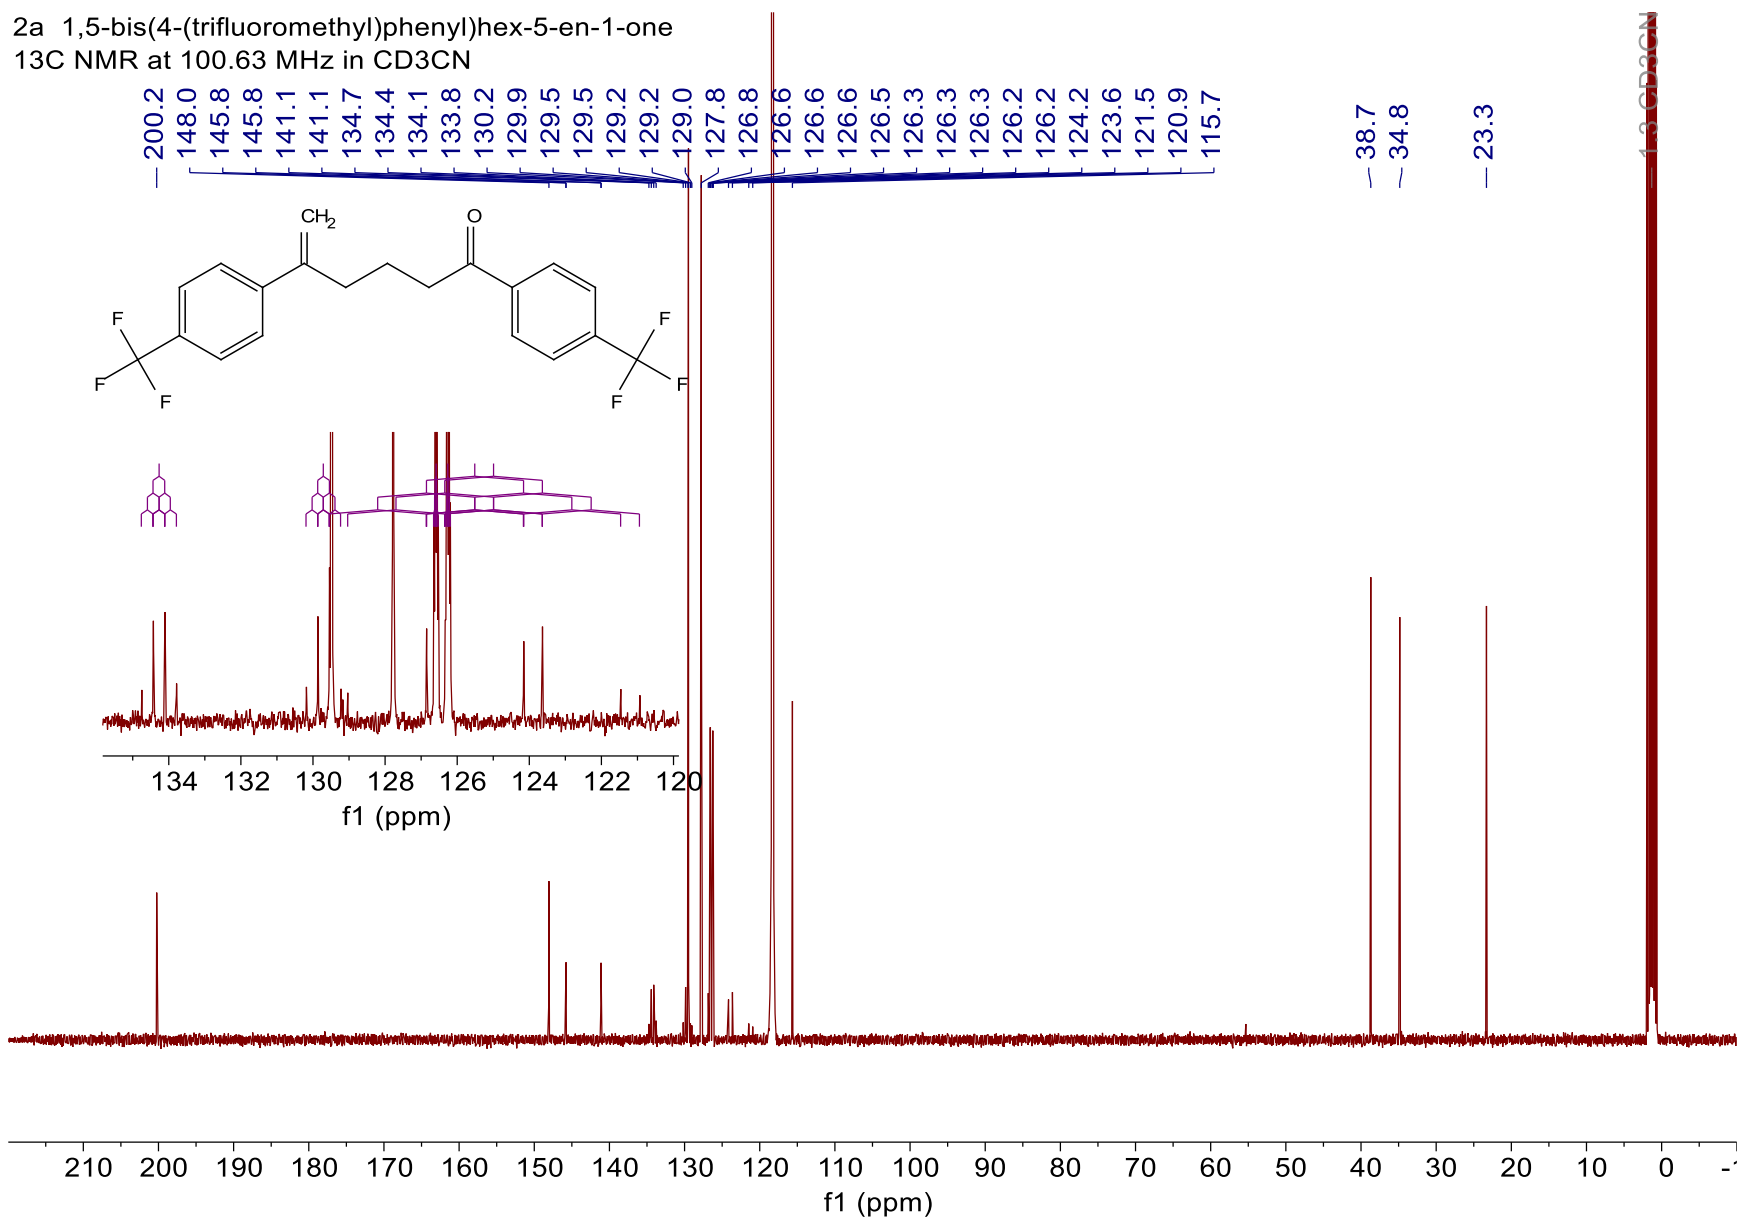

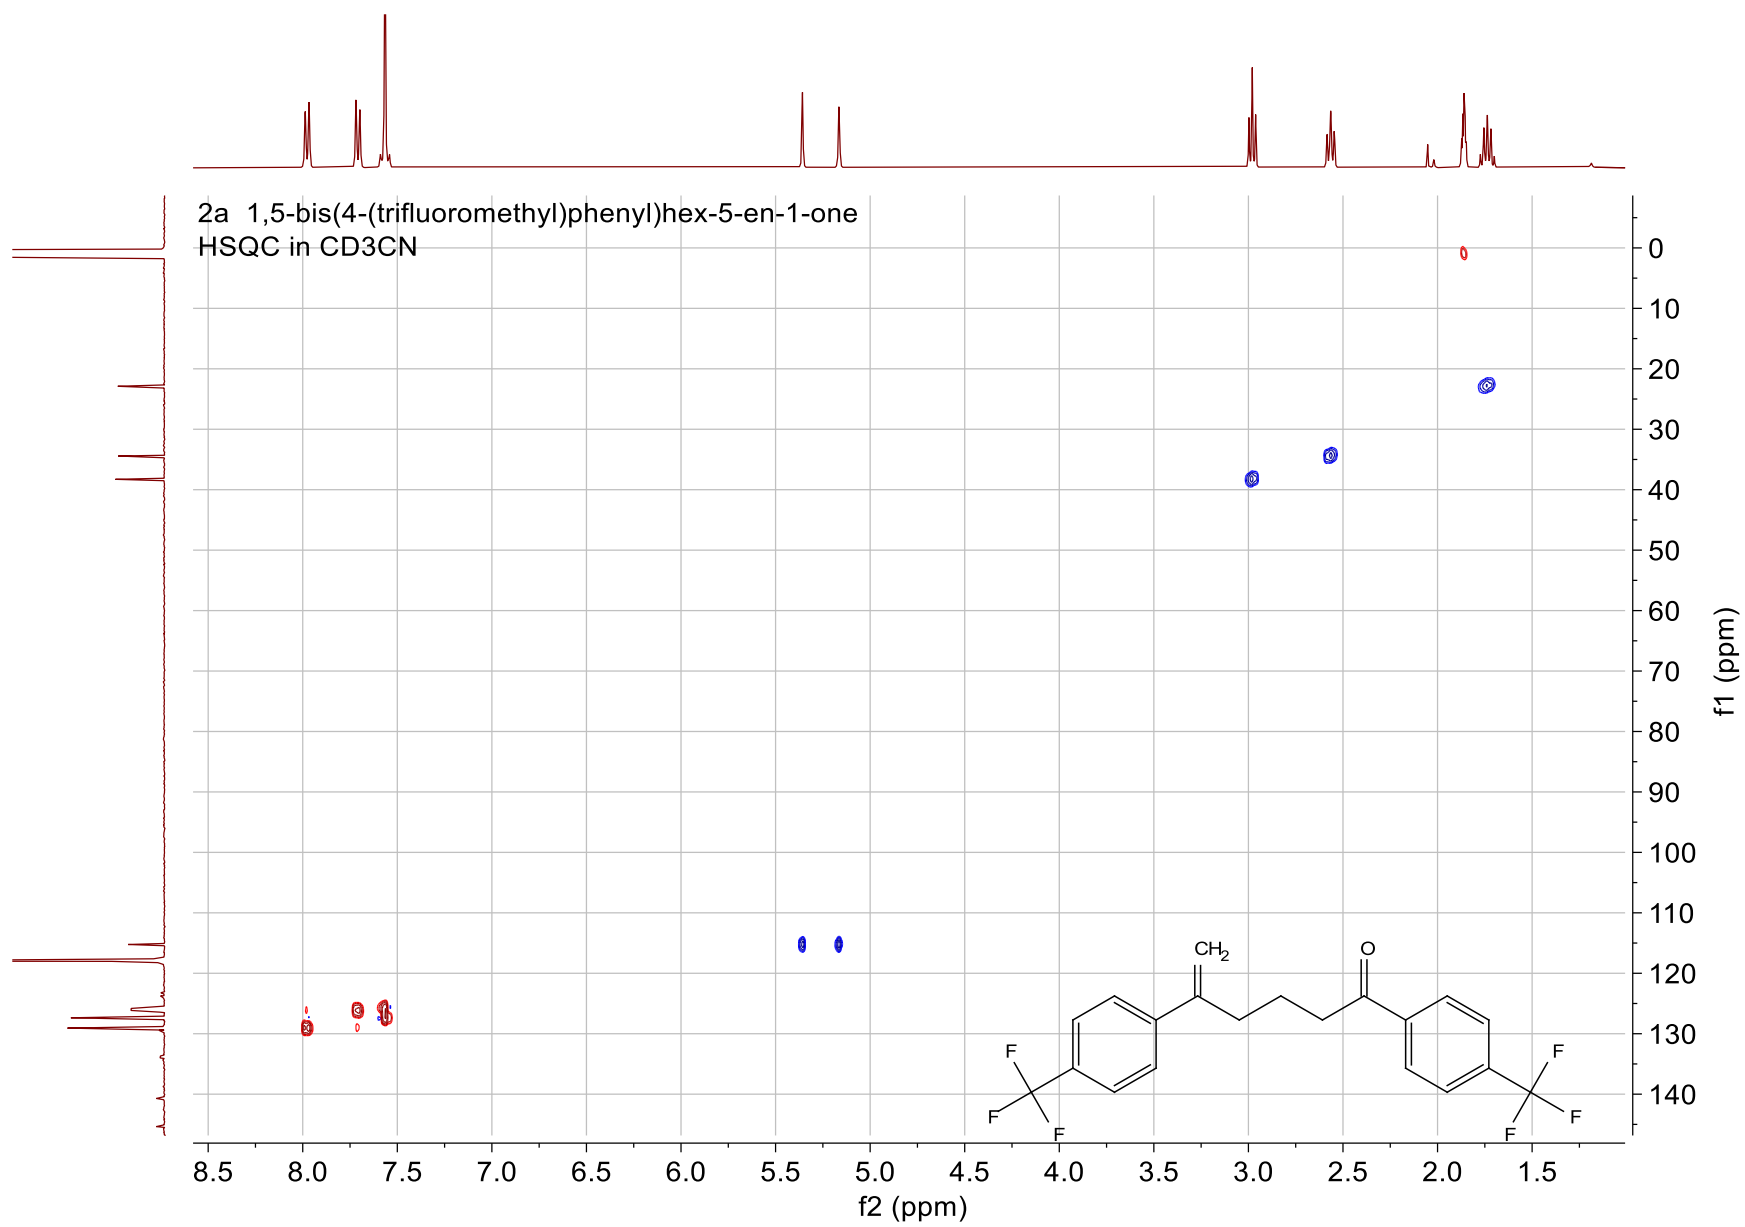

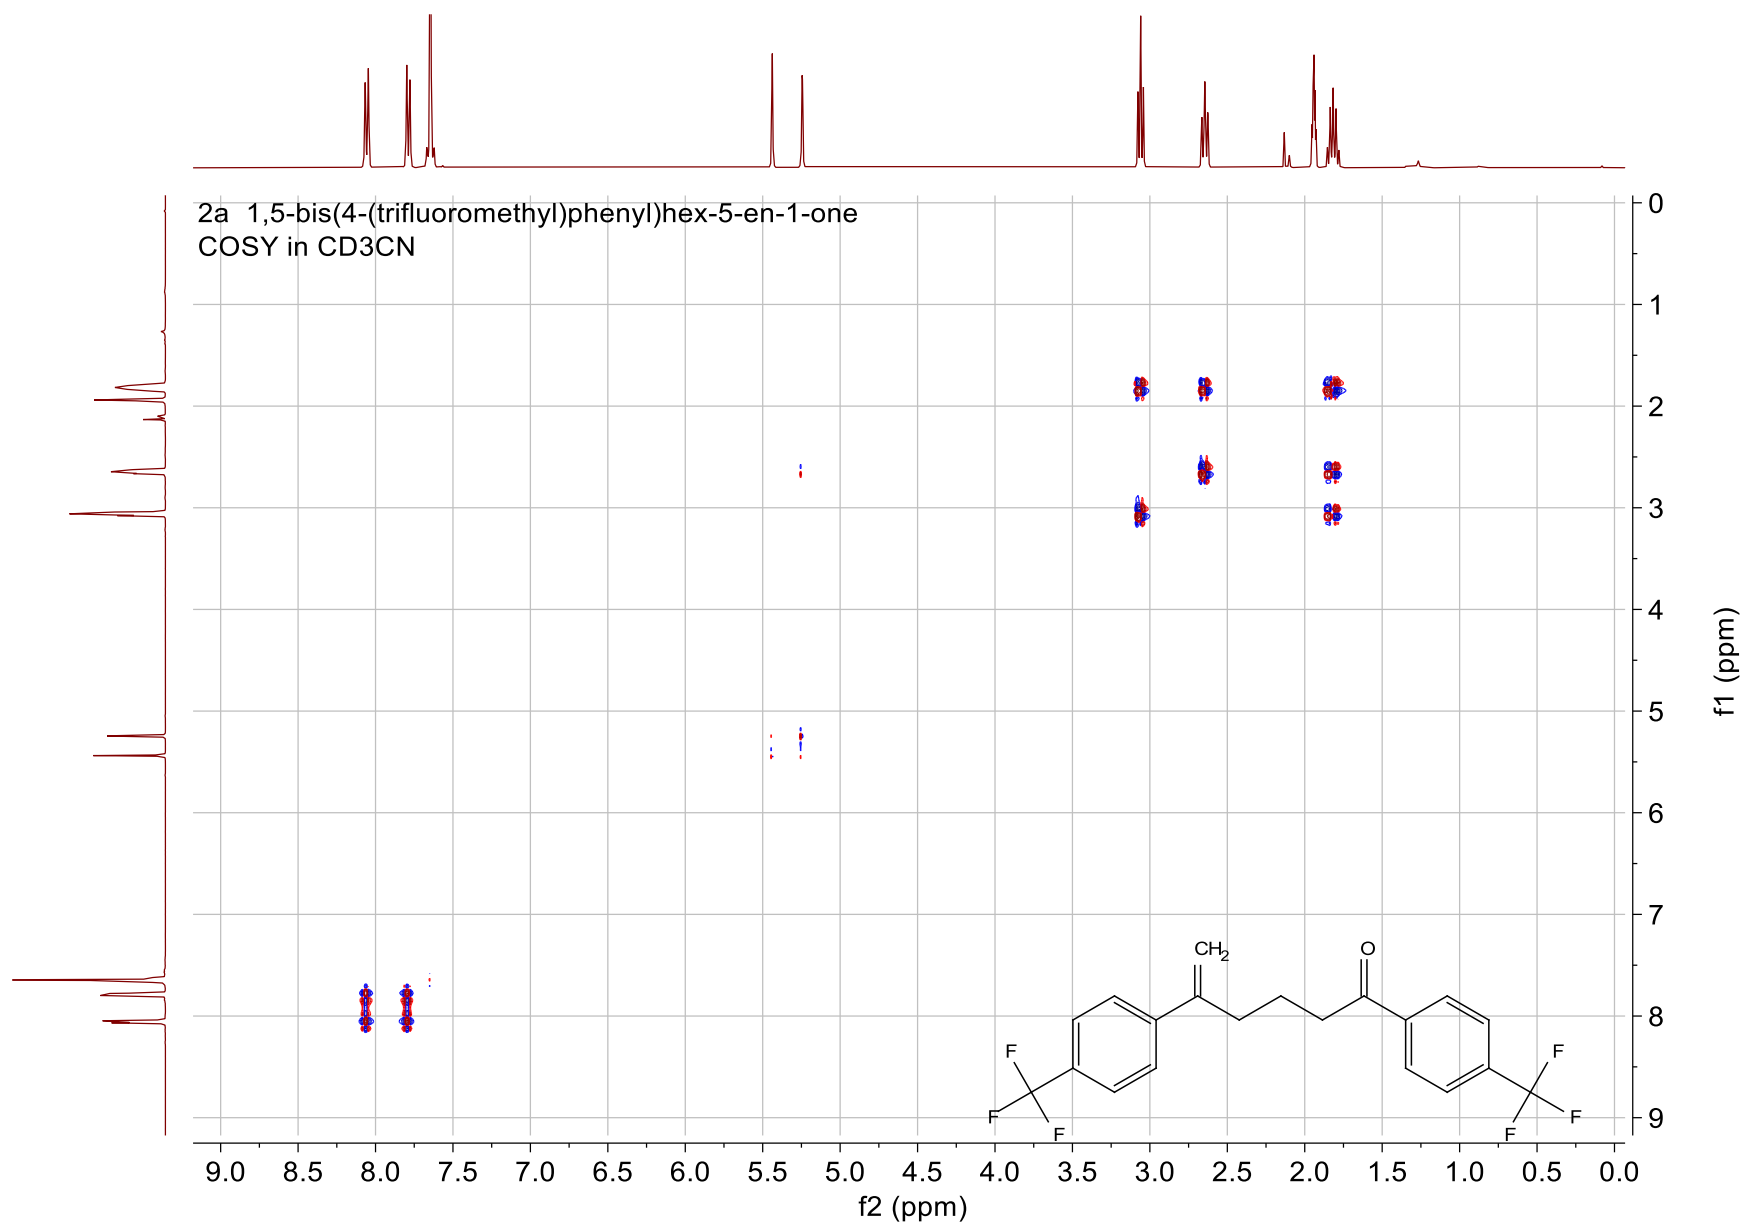

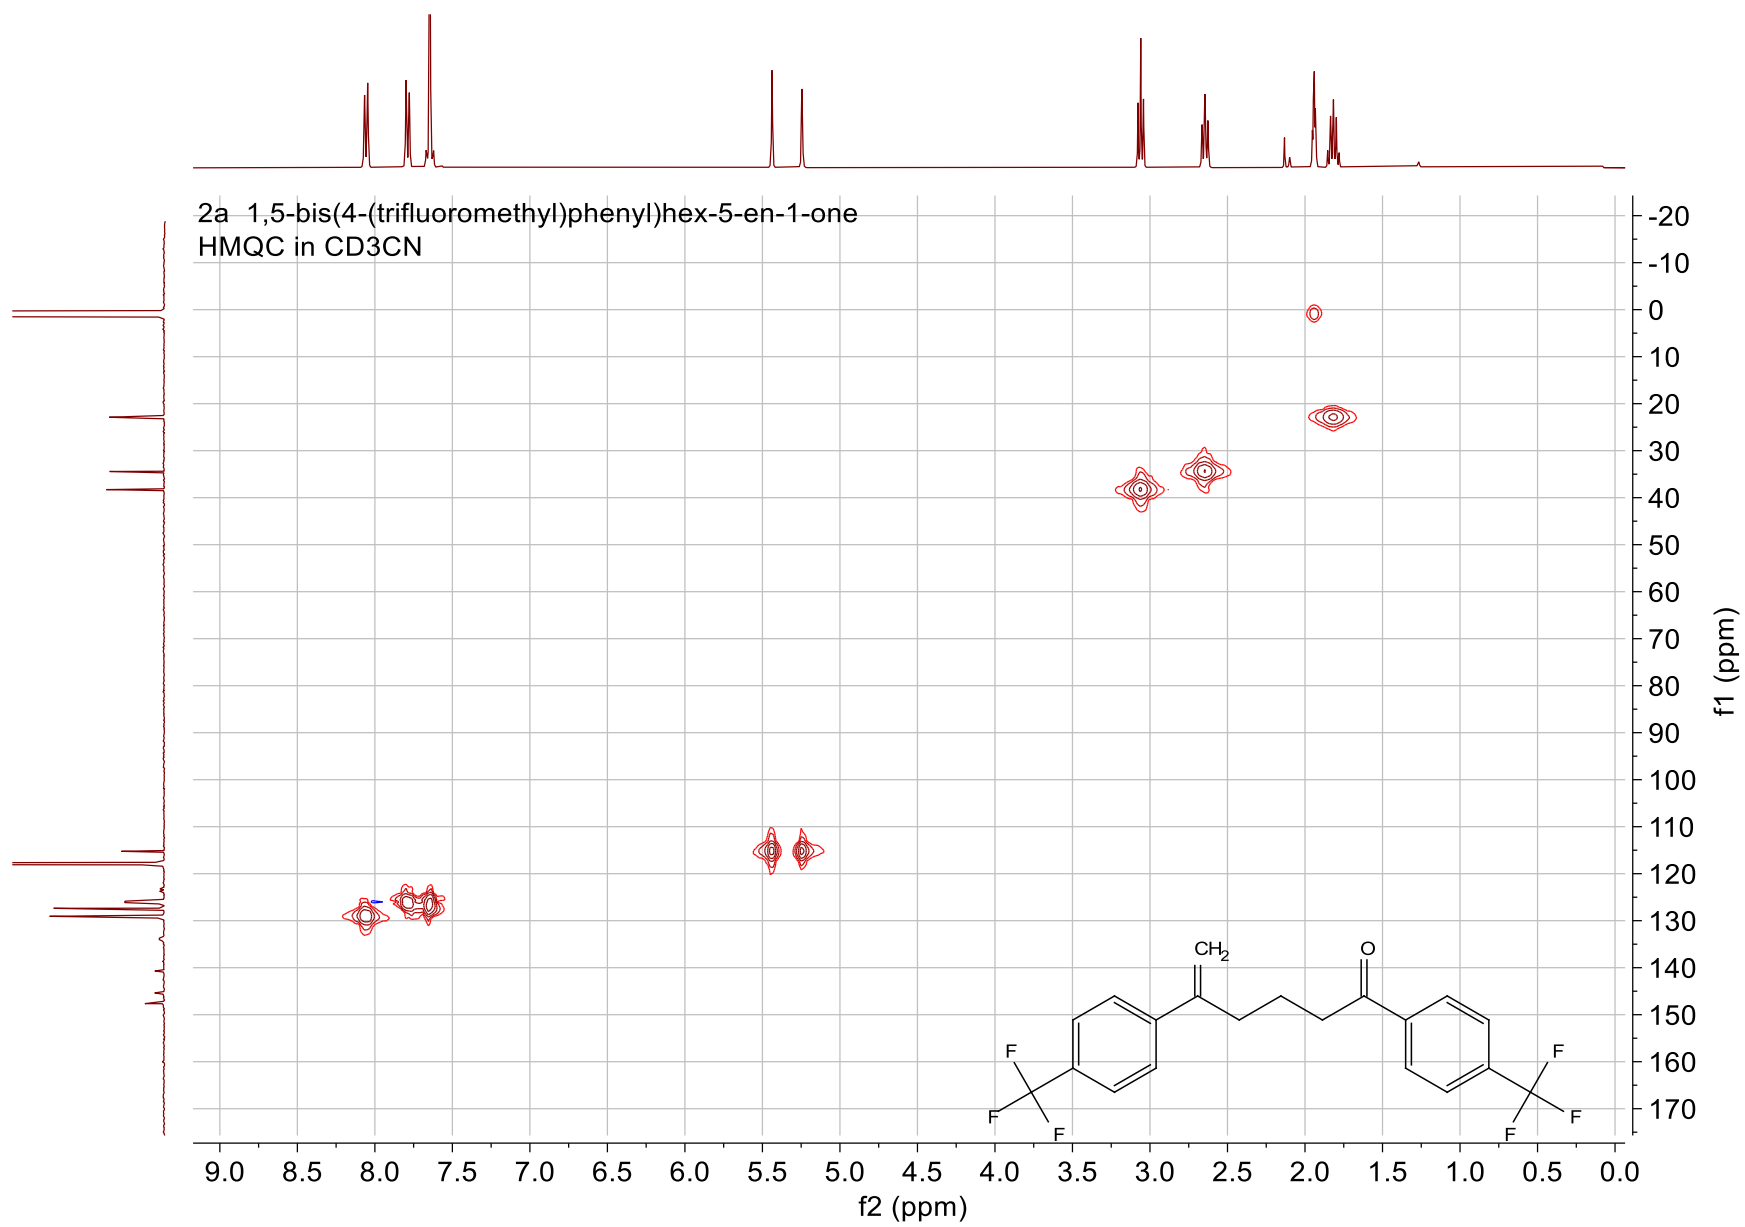

## 2a 1,5-bis(4-(trifluoromethyl)phenyl)hex-5-en-1-one

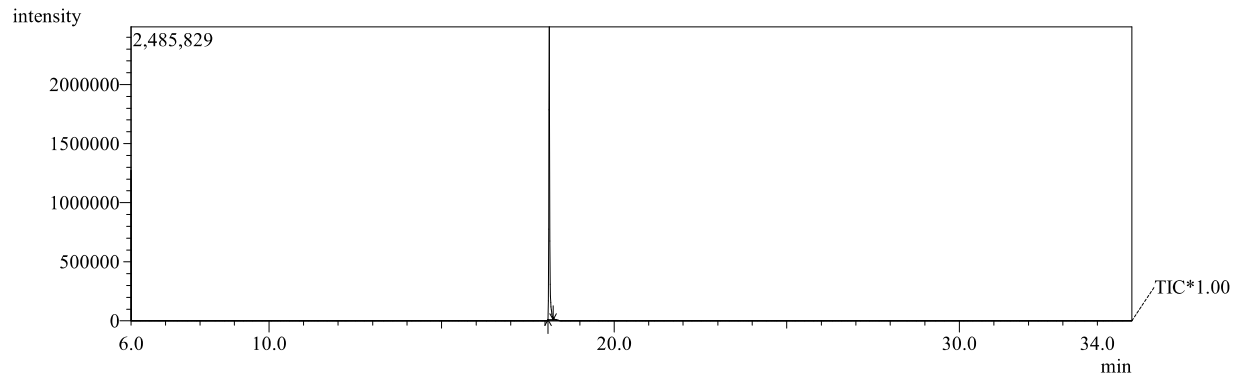

Spectrum

MassPeaks:111  
RawMode:Averaged 18.1-18.1(1454-1456) BasePeak:173(352755)  
BG Mode:Calc. from Peak

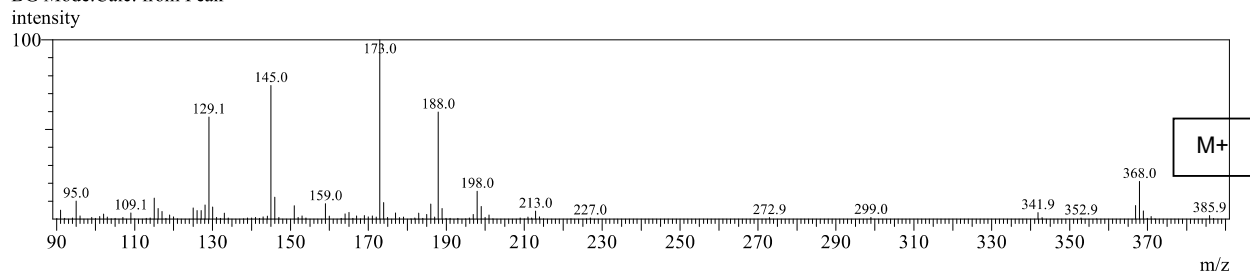

2b 1-phenyl-5-(4-(trifluoromethyl)phenyl)hex-5-en-1-one  
1H NMR at 400.15 MHz in CD3CN

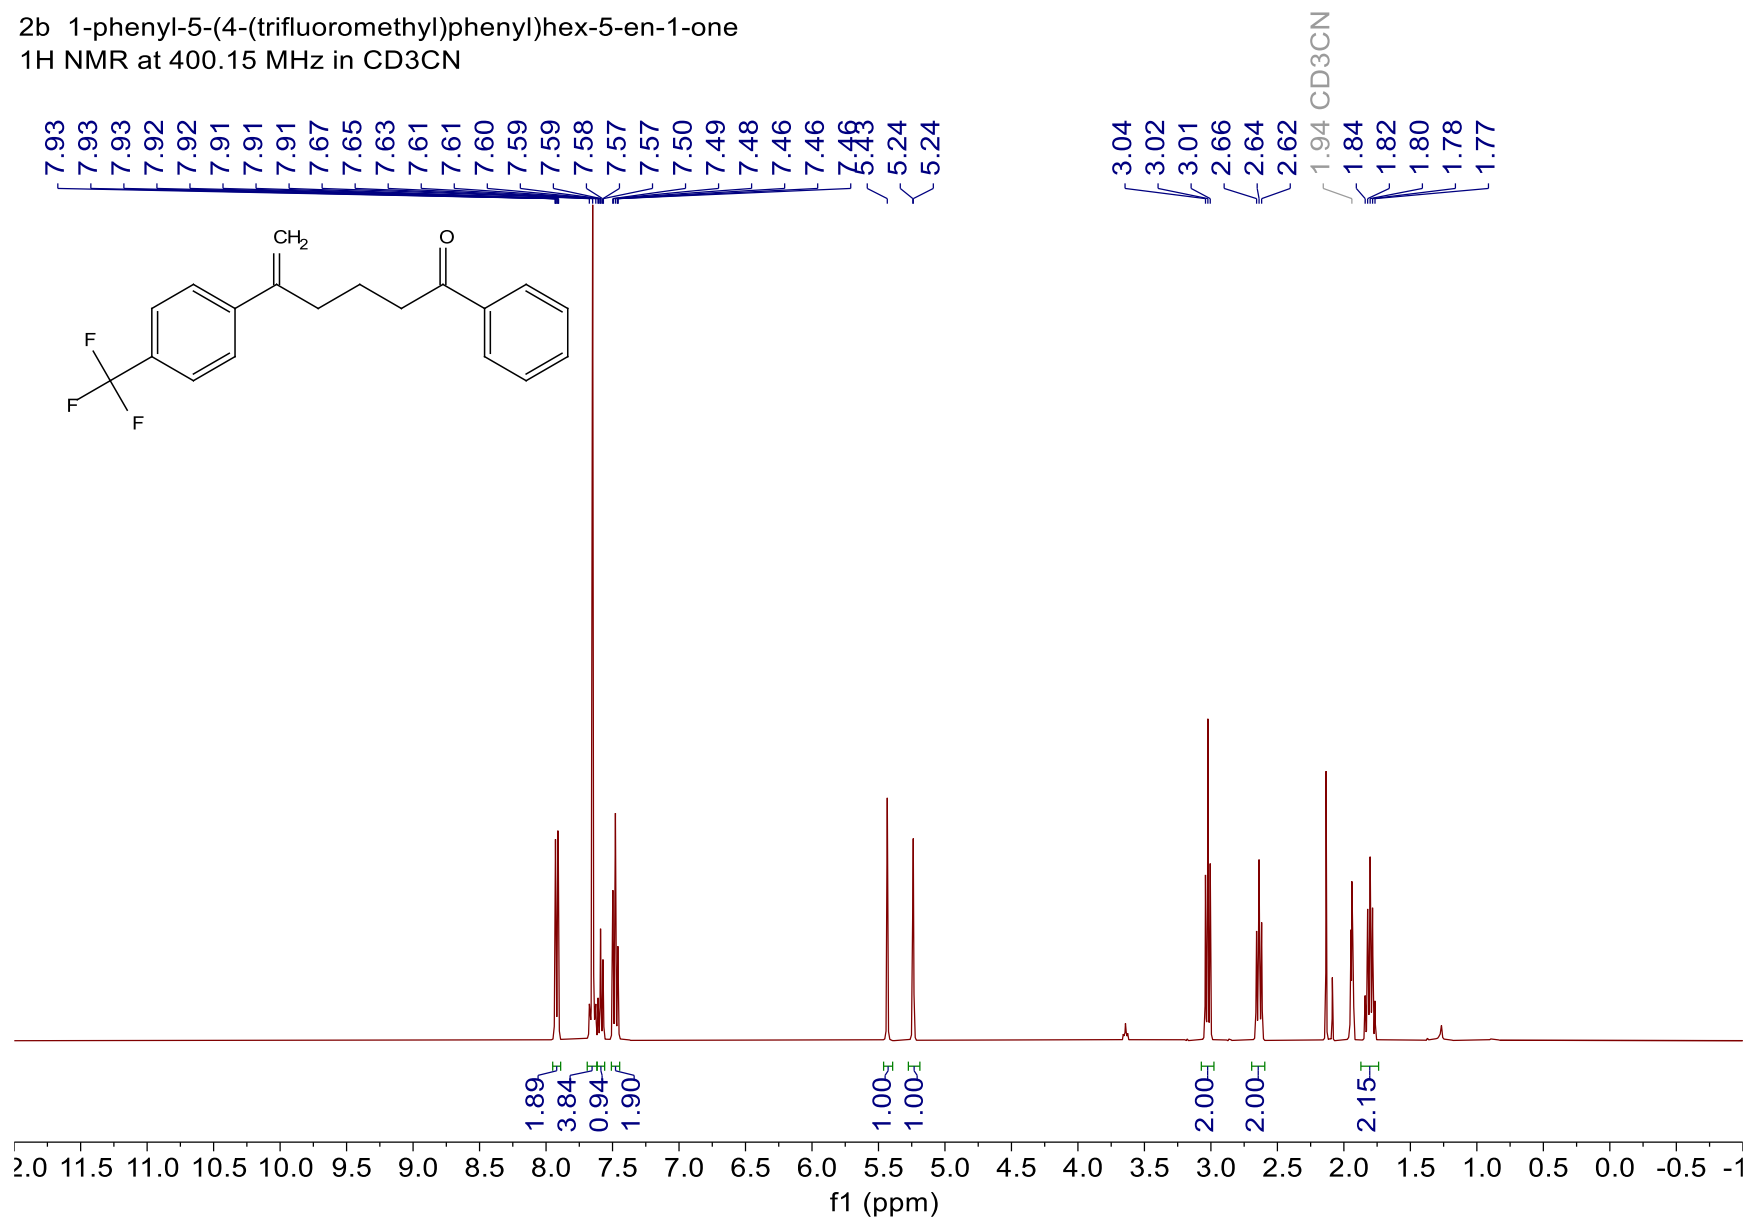

2b 1-phenyl-5-(4-(trifluoromethyl)phenyl)hex-5-en-1-one  
19F NMR at 376.48 MHz in CD3CN

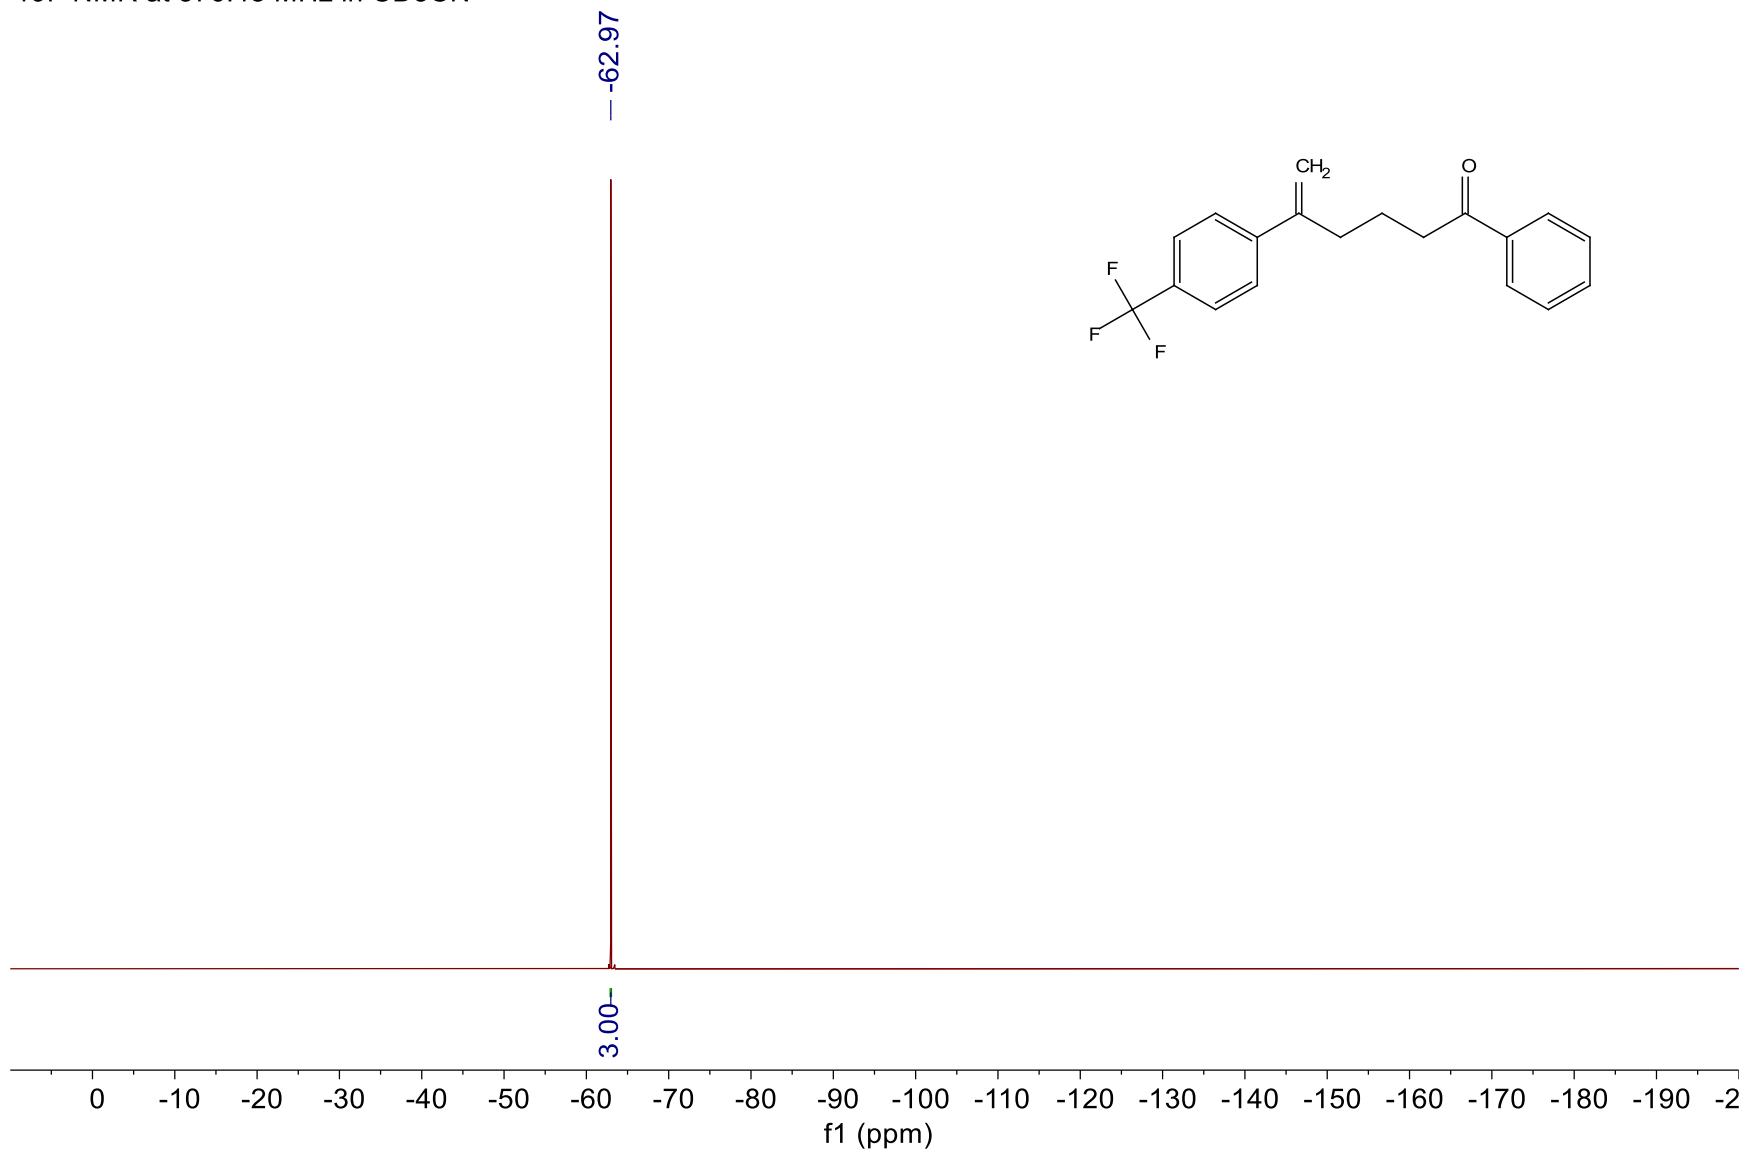



2b 1-phenyl-5-(4-(trifluoromethyl)phenyl)hex-5-en-1-one  
13C NMR at 100.63 MHz in CD3CN

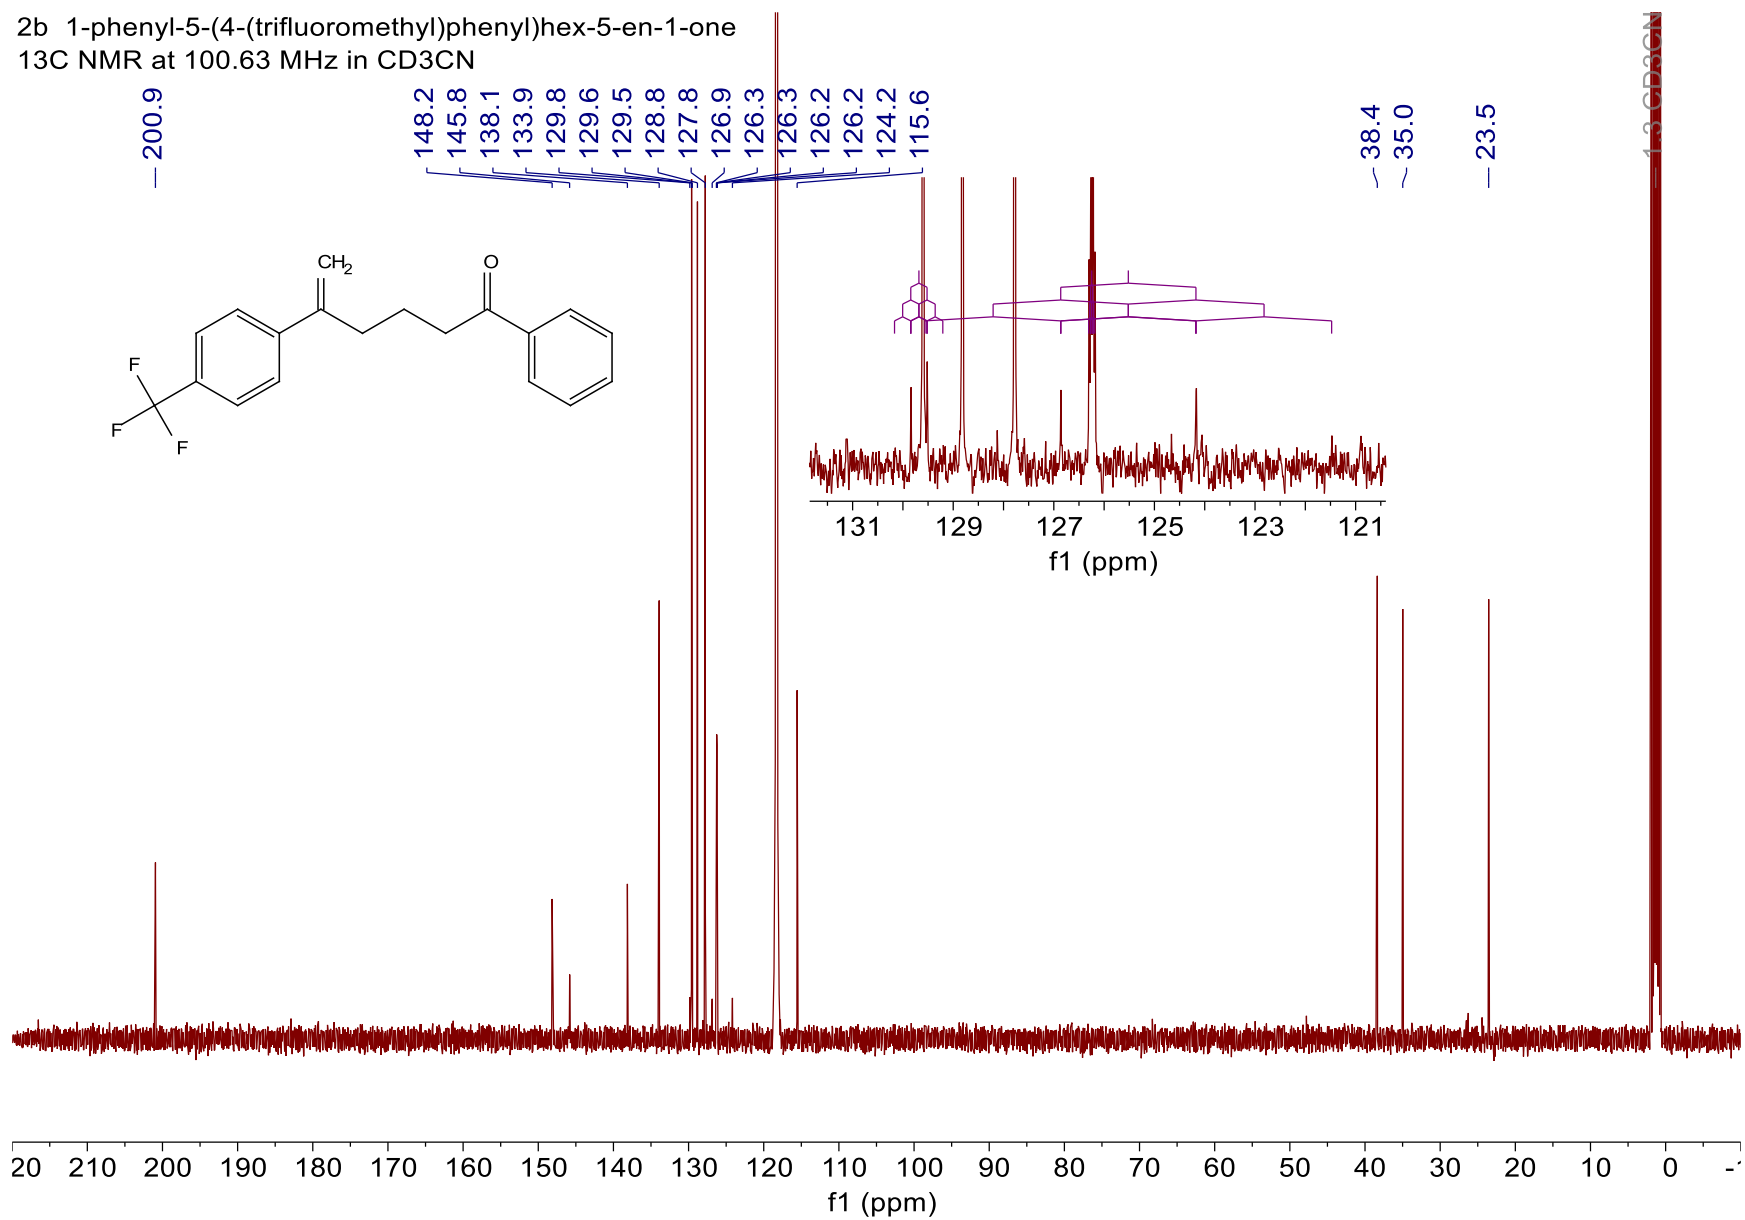

## 2b 1-phenyl-5-(4-(trifluoromethyl)phenyl)hex-5-en-1-one

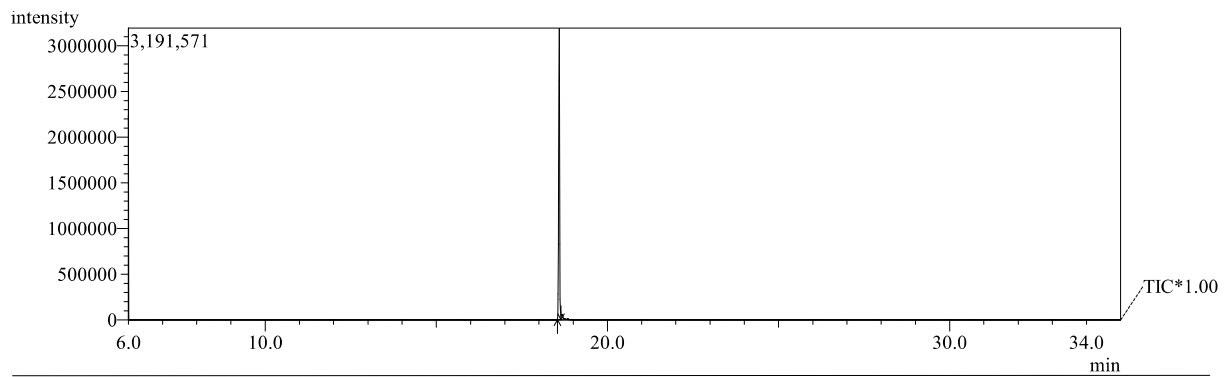

MassPeaks:102  
RawMode:Averaged 18.6-18.6(1511-1513) BasePeak:105(912776)  
BG Mode:Calc. from Peak

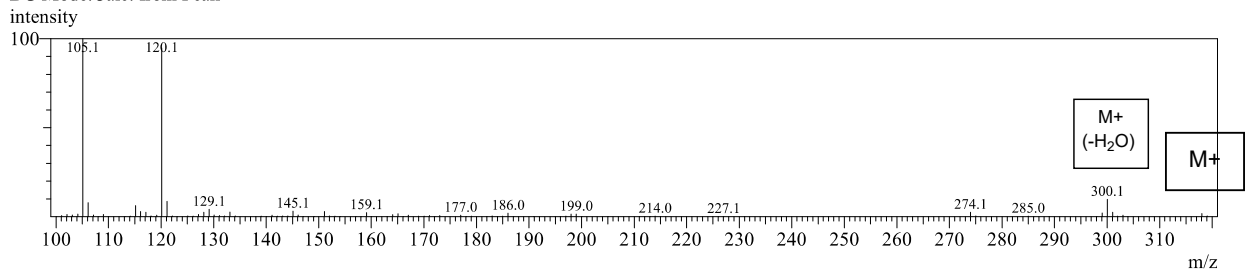

2c 5-phenyl-1-(4-(trifluoromethyl)phenyl)hex-5-en-1-one  
1H NMR at 400.15 MHz in CD3CN

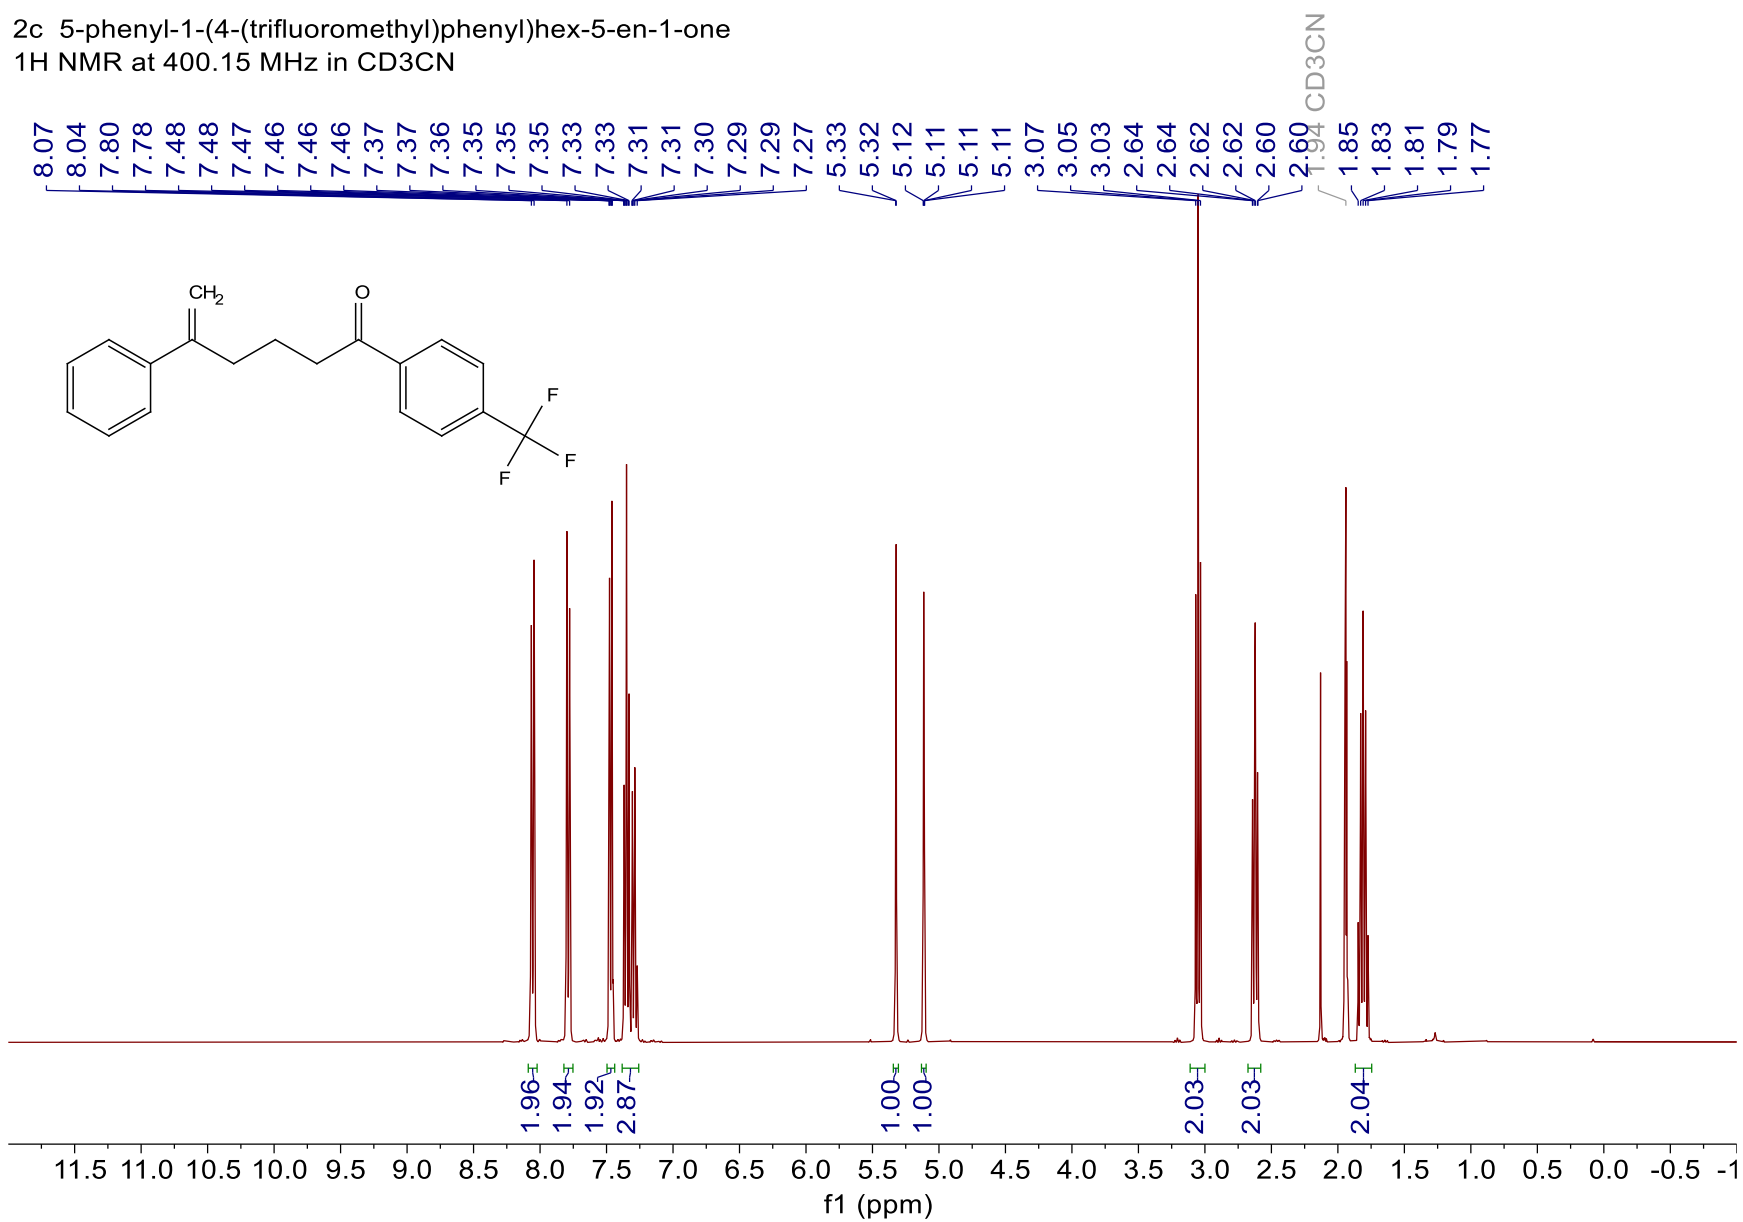

2c 5-phenyl-1-(4-(trifluoromethyl)phenyl)hex-5-en-1-one  
19F NMR at 376.48 MHz in CD3CN

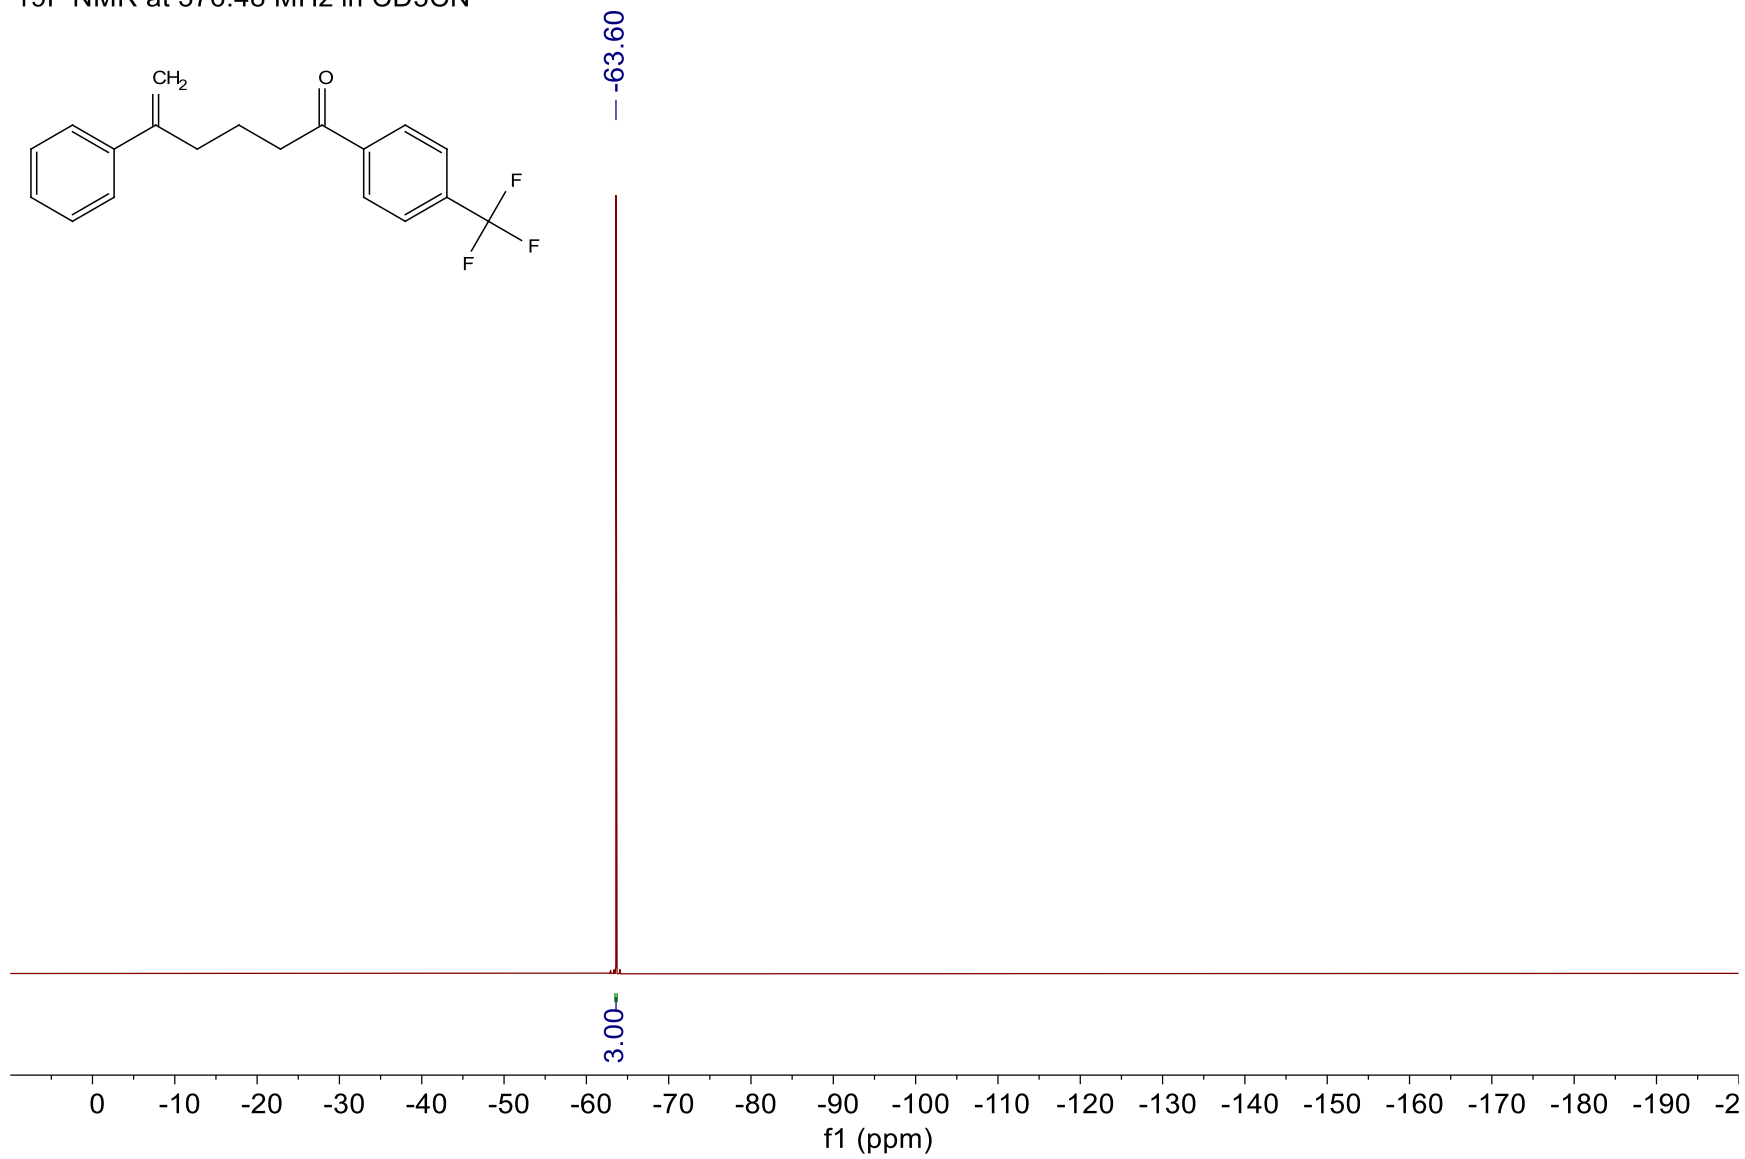

2c 5-phenyl-1-(4-(trifluoromethyl)phenyl)hex-5-en-1-one  
13C NMR at 100.63 MHz in CD3CN

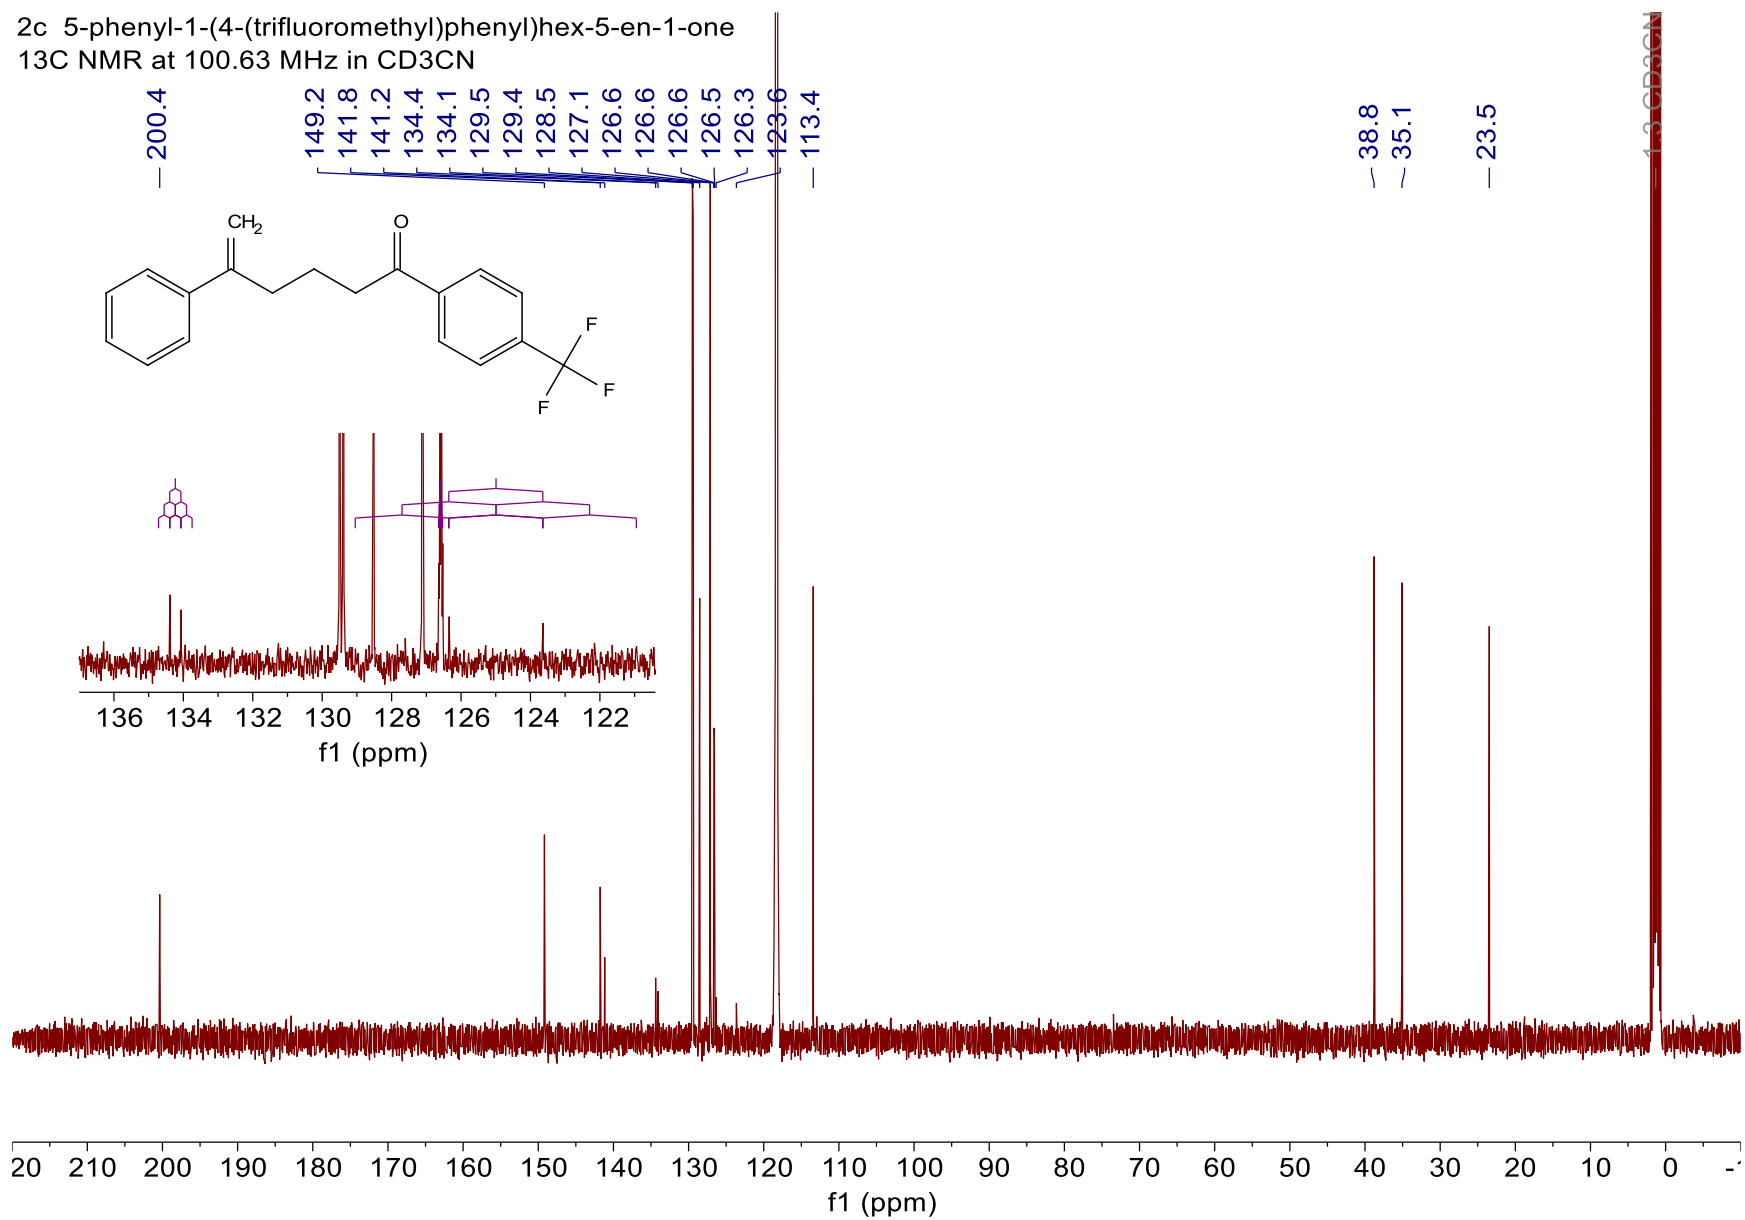

## 2c 5-phenyl-1-(4-(trifluoromethyl)phenyl)hex-5-en-1-one

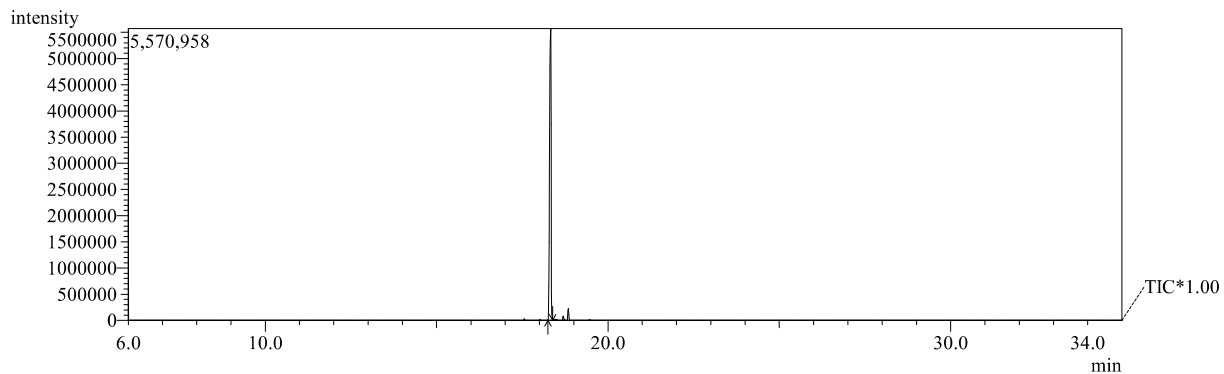

MassPeaks:145  
RawMode:Averaged 18.3-18.3(1480-1482) BasePeak:130(807206)  
BG Mode:Calc. from Peak

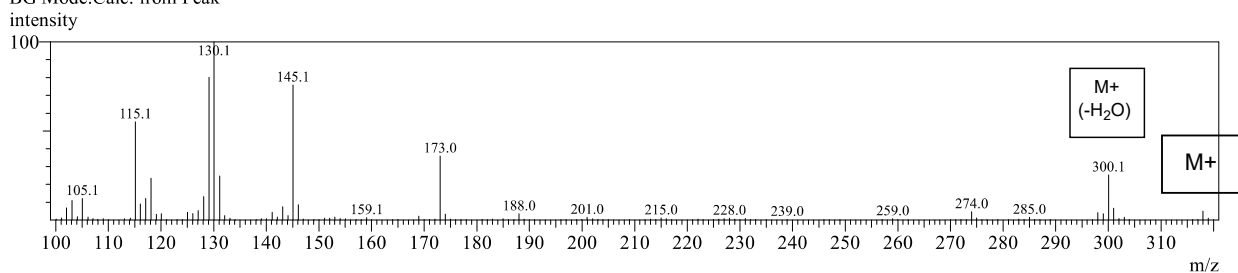

2d 1,5-diphenylhex-5-en-1-one  
1H NMR at 400.15 MHz in CDCl3

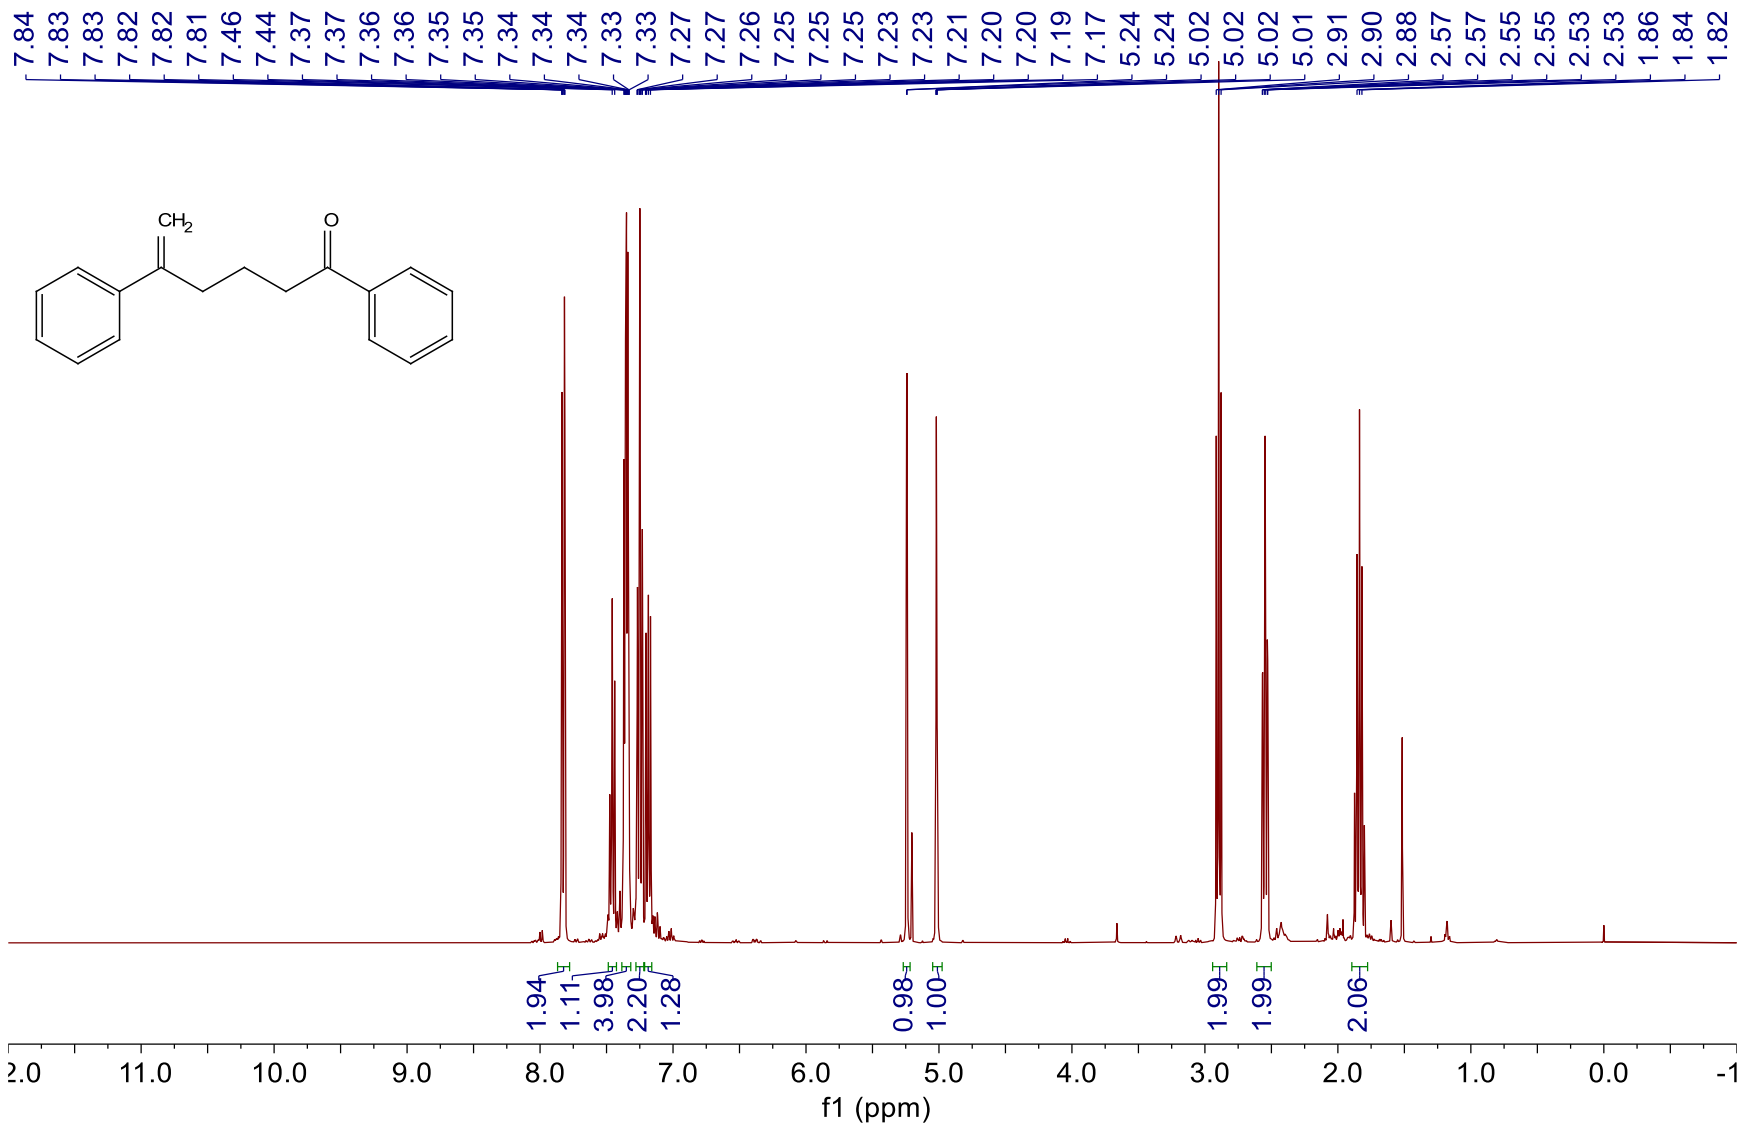

2d 1,5-diphenylhex-5-en-1-one  
13C NMR at 100.63 MHz in CDCl3

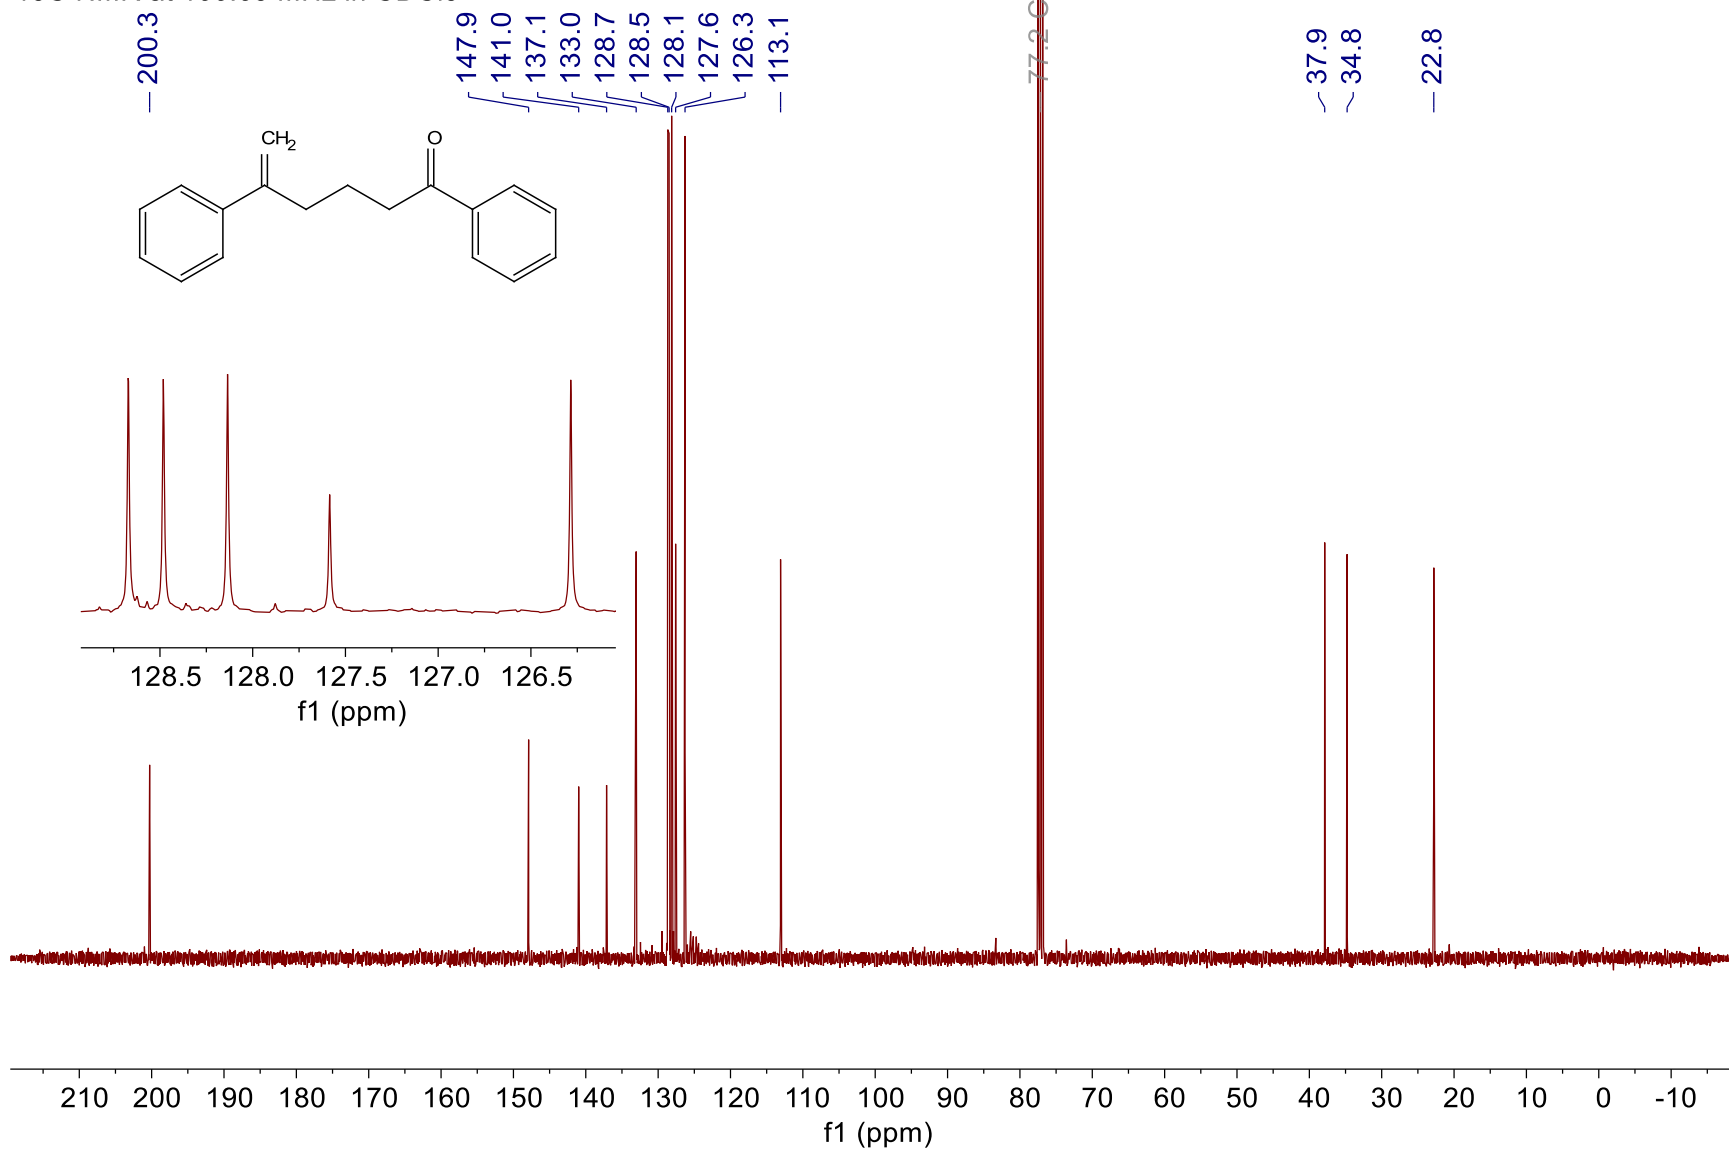



## 2d 1,5-diphenylhex-5-en-1-one

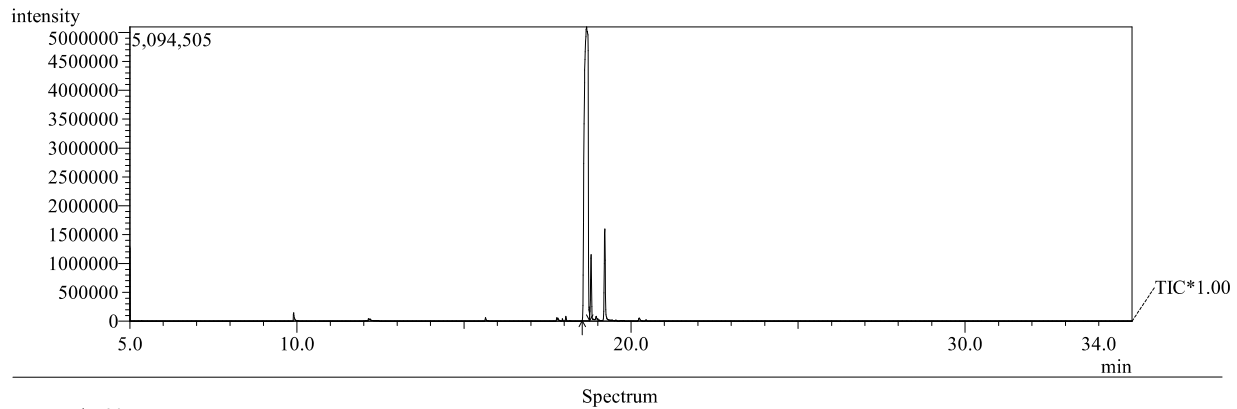

MassPeaks:90  
RawMode:Averaged 18.7-18.7(1641-1643) BasePeak:105(1160473)  
BG Mode:Calc. from Peak

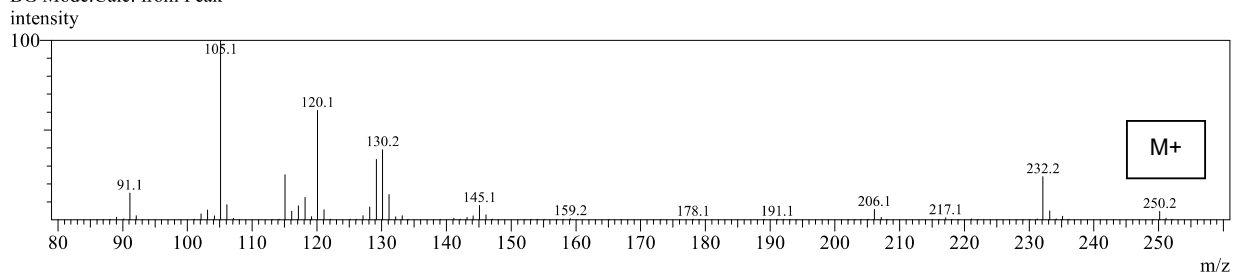

2e 6-phenylhept-6-en-2-one  
1H NMR at 400.15 MHz in CD2Cl2

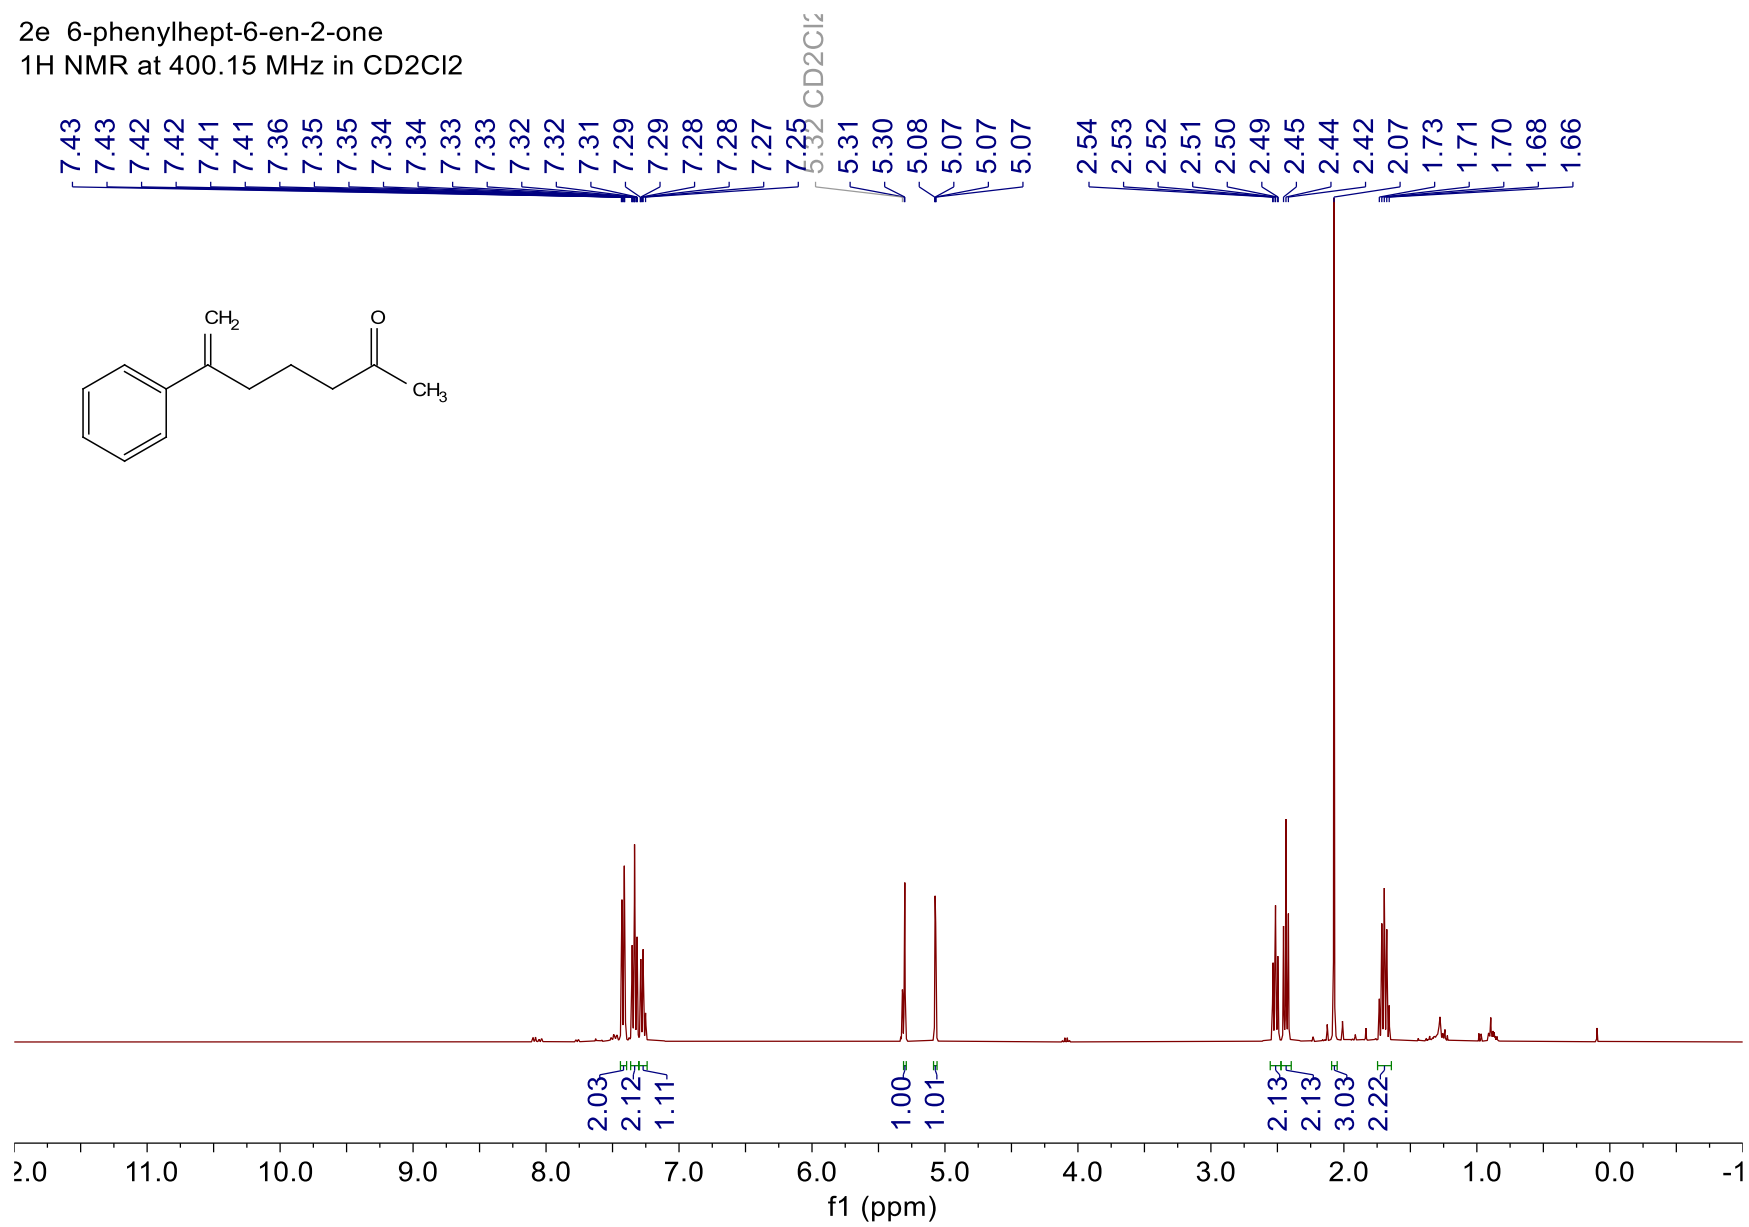

2e 6-phenylhept-6-en-2-one  
13C NMR at 100.63 MHz in CD2Cl2

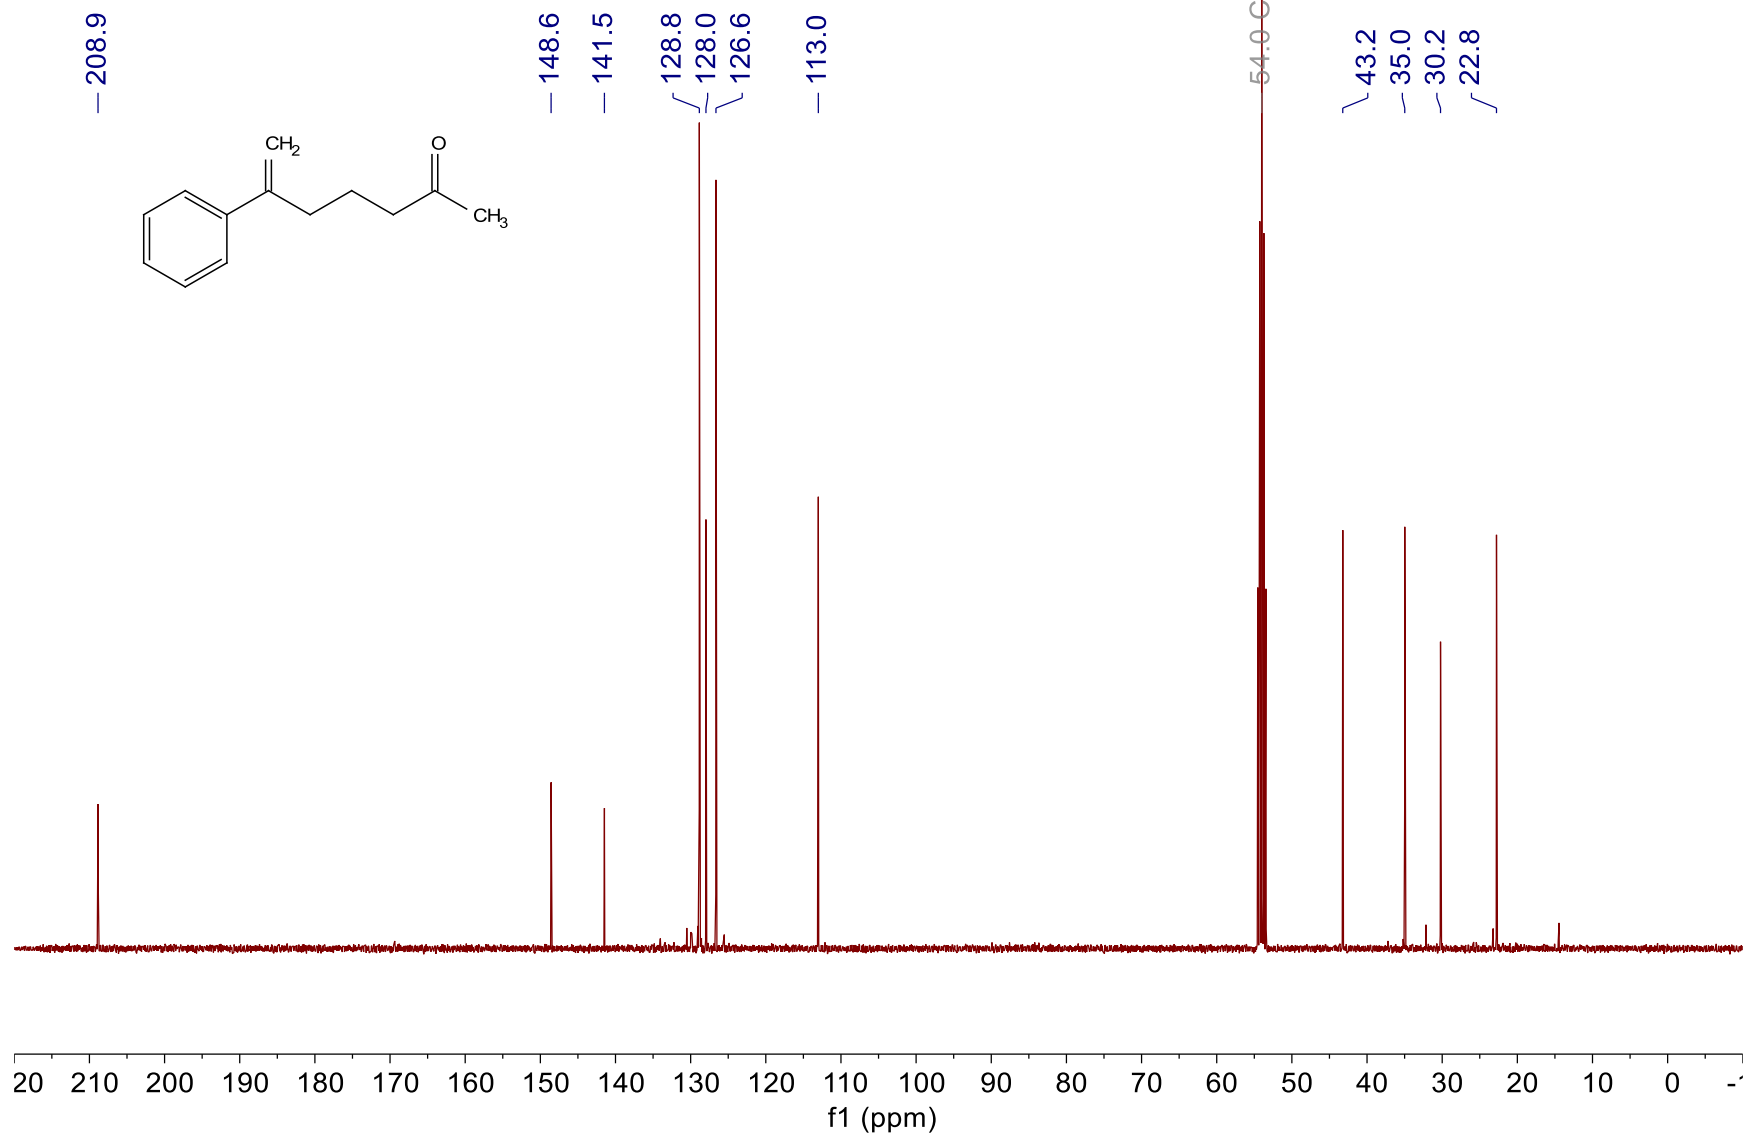

## 2e 6-phenylhept-6-en-2-one

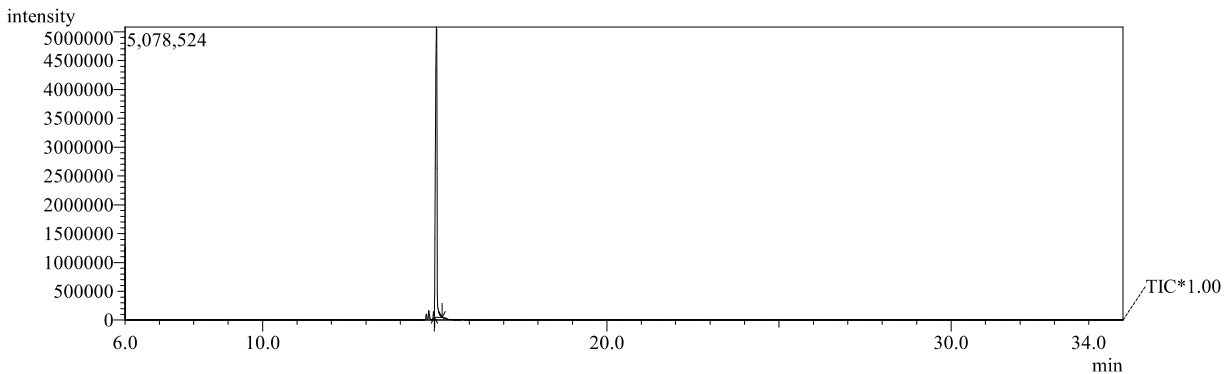

Spectrum

MassPeaks:61  
RawMode:Averaged 15.0-15.1(1086-1088) BasePeak:129(831223)  
BG Mode:Calc. from Peak

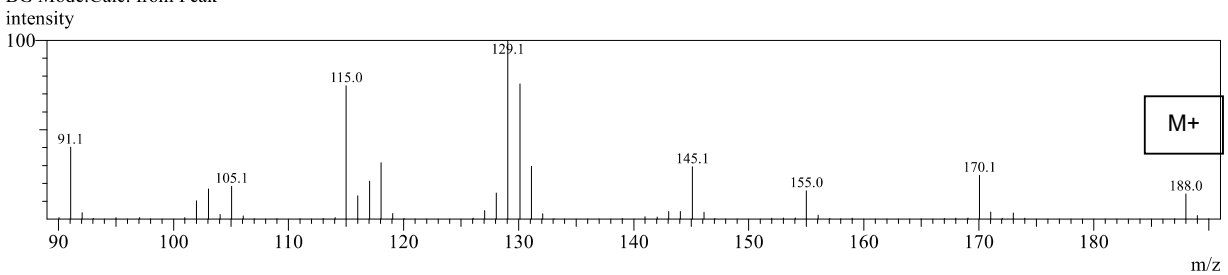

2f 8-(4-(trifluoromethyl)phenyl)nona-1,8-dien-4-one  
1H NMR at 400.15 MHz in CDCl3

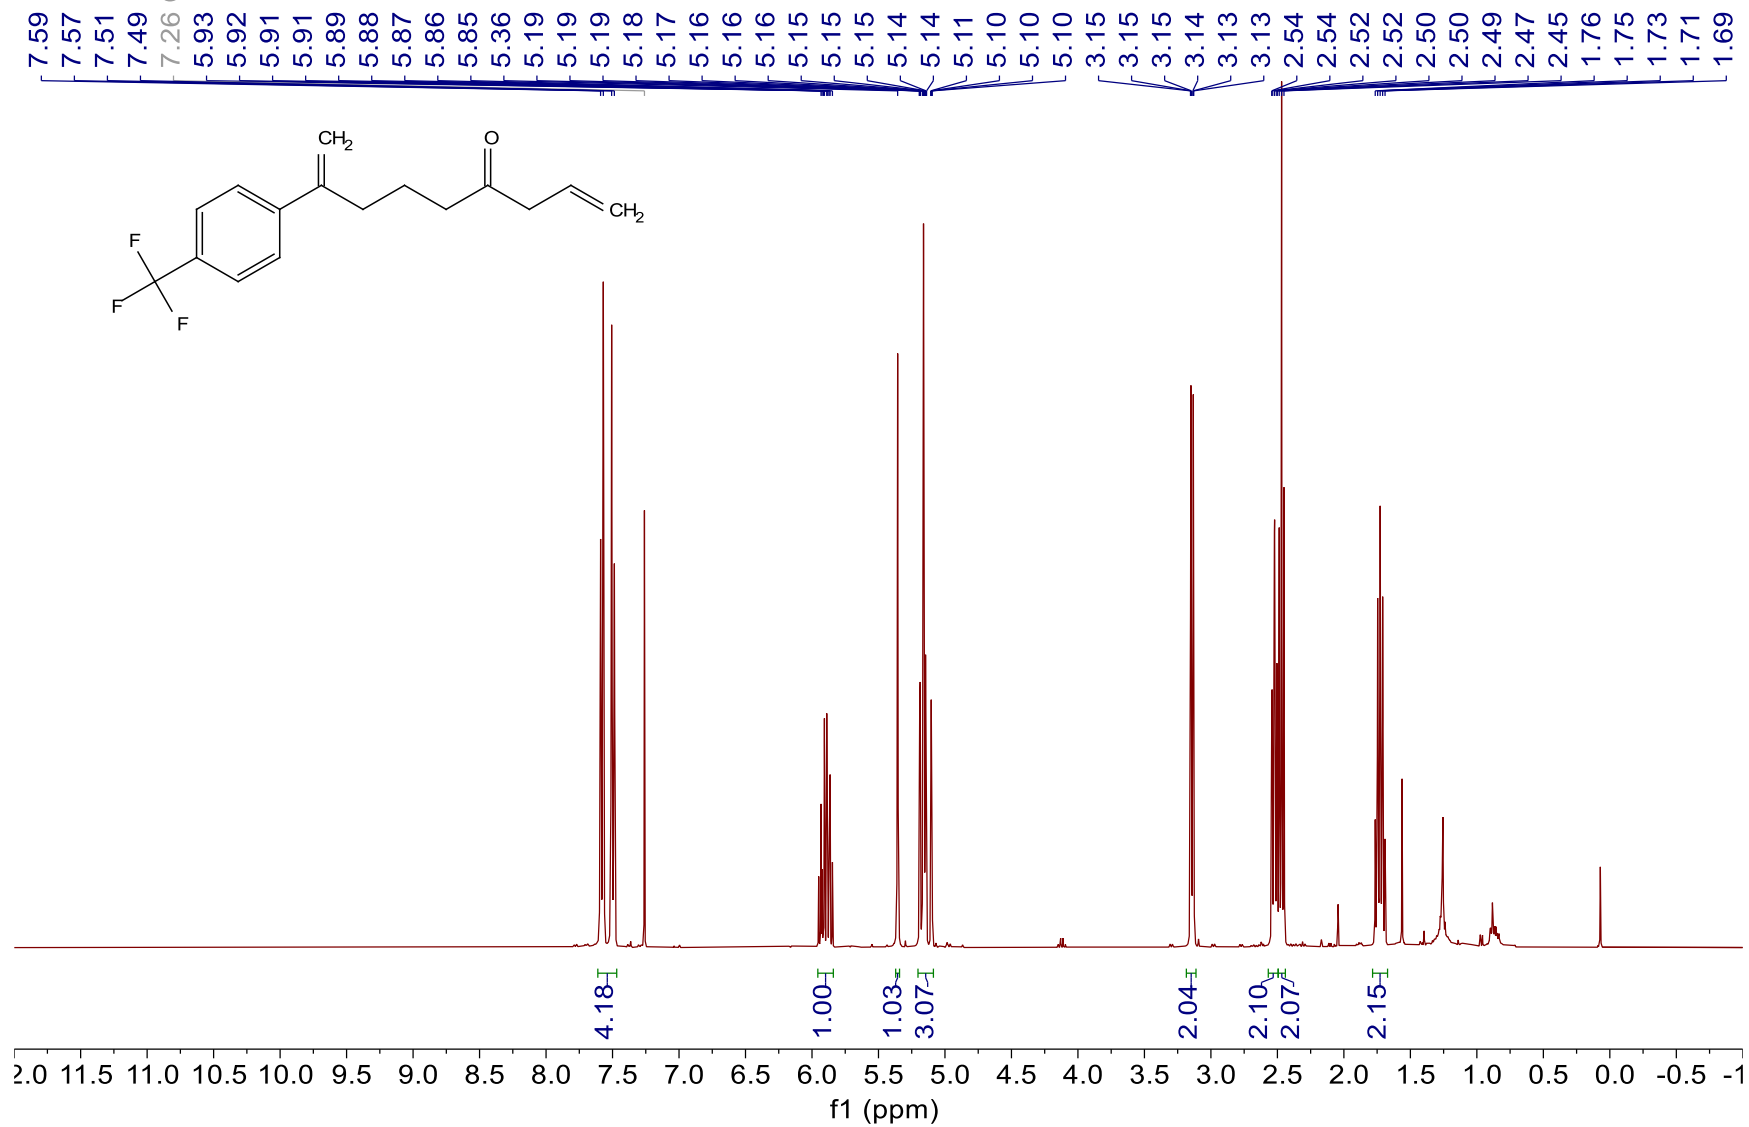

2f 8-(4-(trifluoromethyl)phenyl)nona-1,8-dien-4-one  
19F NMR at 376.48 MHz in CDCl3

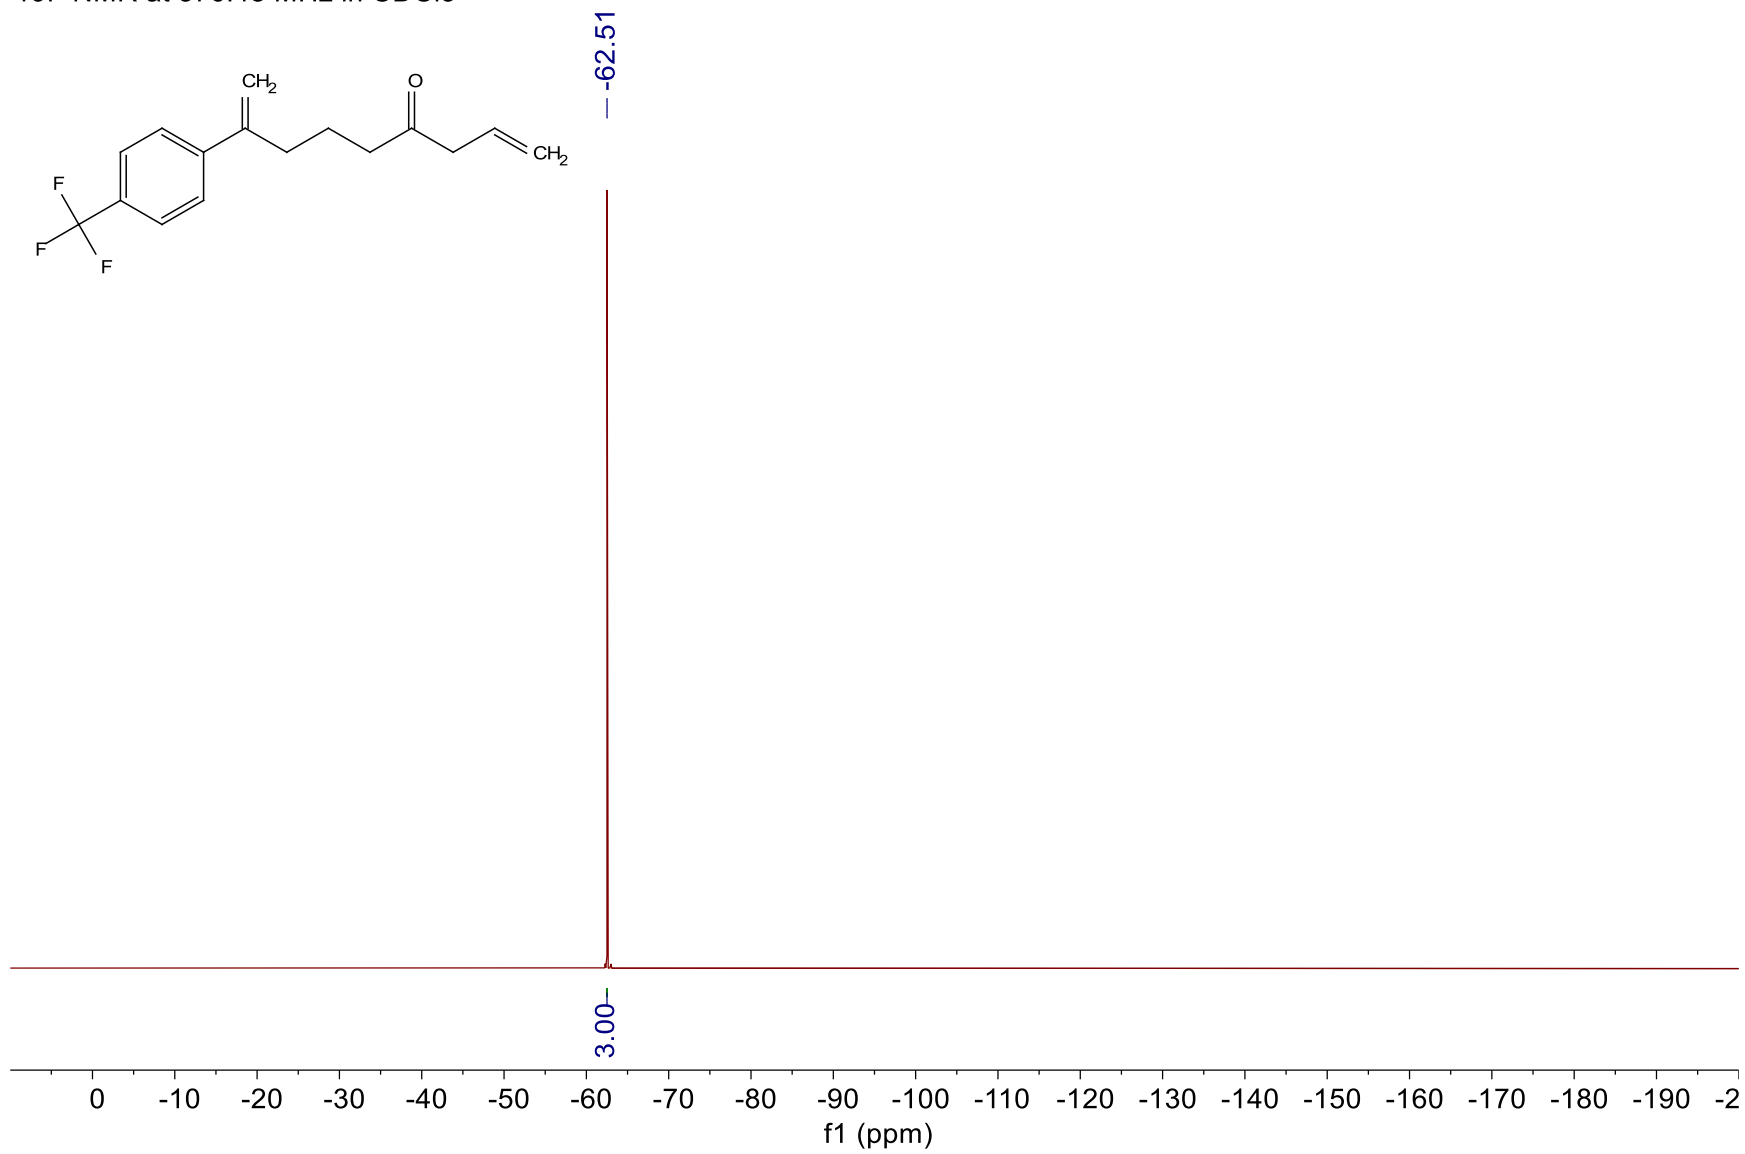

2f 8-(4-(trifluoromethyl)phenyl)nona-1,8-dien-4-one  
13C NMR at 100.63 MHz in CDCl3

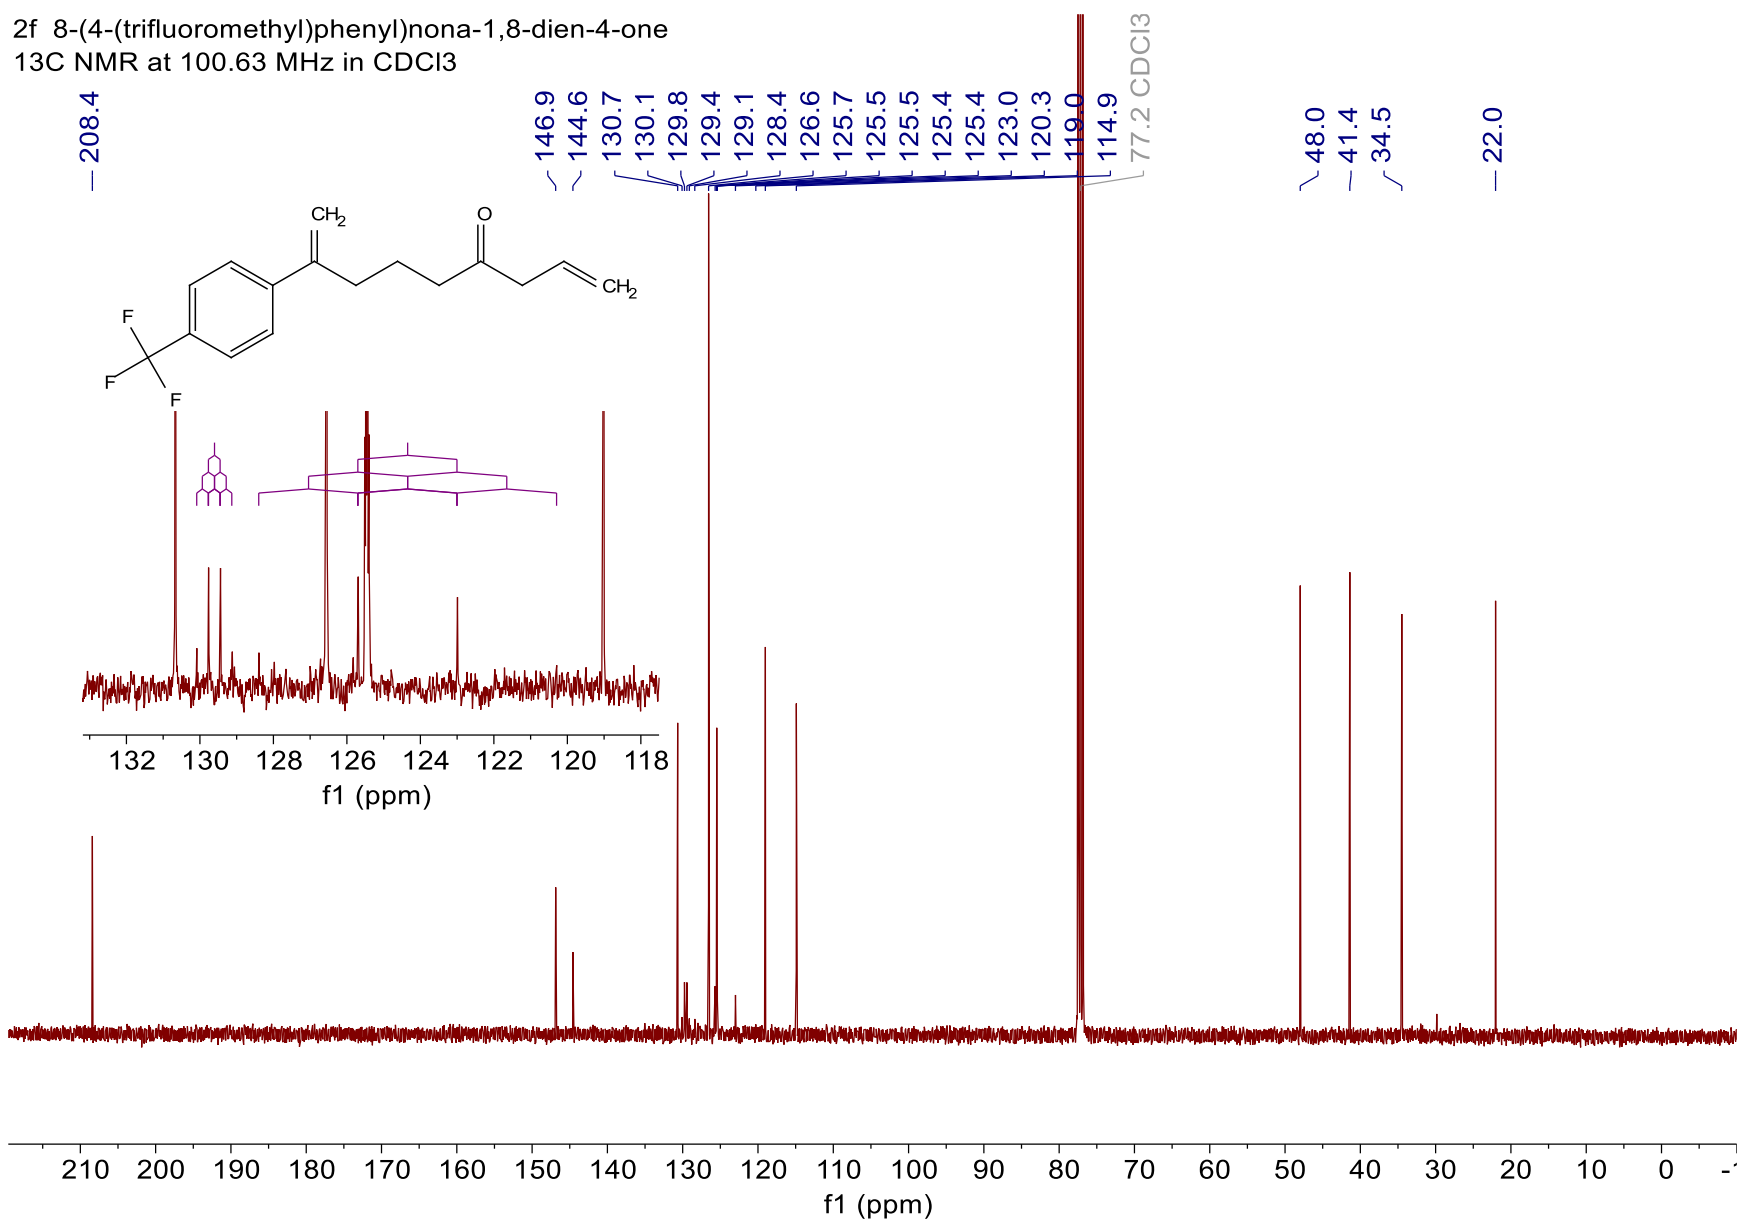

## 2f 8-(4-(trifluoromethyl)phenyl)nona-1,8-dien-4-one

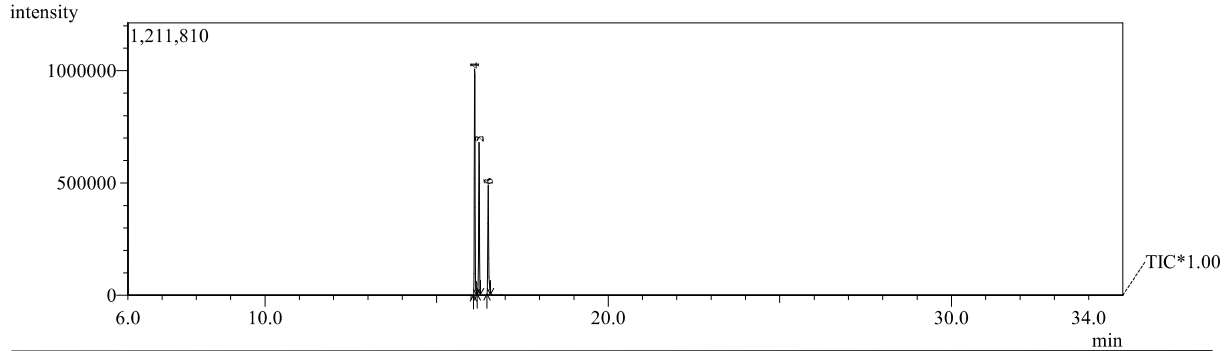

Spectrum

Line#:1 R.Time:16.1(Scan#:1214)  
MassPeaks:100  
RawMode:Averaged 16.1-16.1(1213-1215) BasePeak:241(97489)  
BG Mode:Calc. from Peak  
intensity

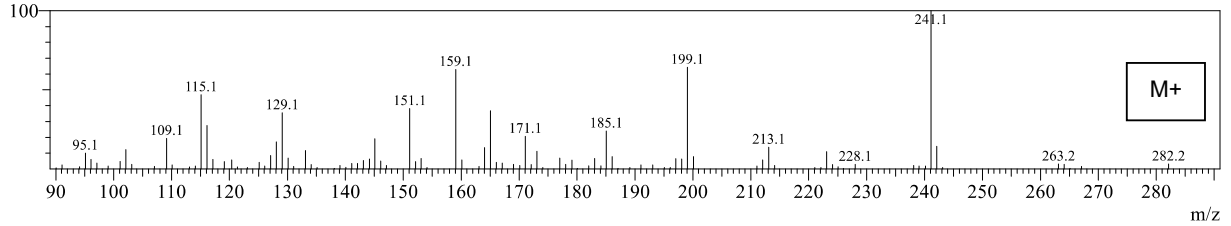

Line#:2 R.Time:16.2(Scan#:1229)  
MassPeaks:111  
RawMode:Averaged 16.2-16.2(1228-1230) BasePeak:109(37876)  
BG Mode:Calc. from Peak  
intensity

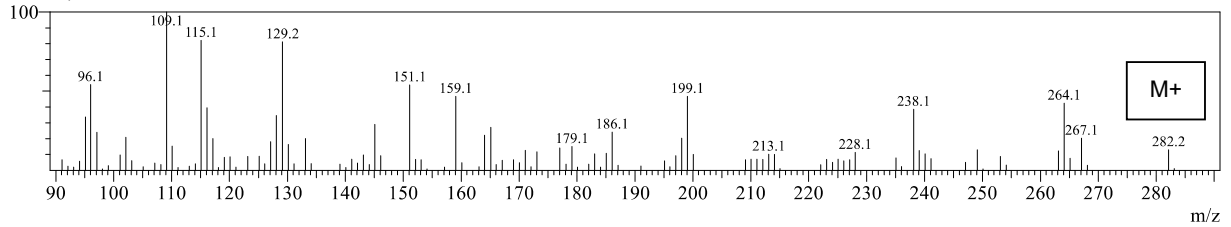

Line#:3 R.Time:16.5(Scan#:1261)  
MassPeaks:97  
RawMode:Averaged 16.5-16.5(1260-1262) BasePeak:109(25485)  
BG Mode:Calc. from Peak  
intensity

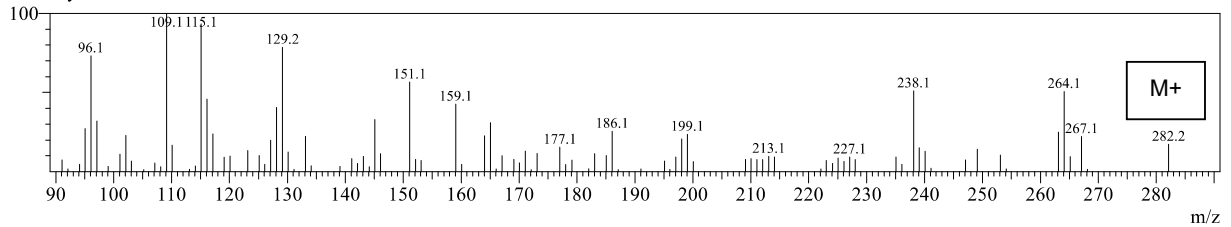



2g 1-(dimethylamino)-8-(4-(trifluoromethyl)phenyl)non-8-en-2-yn-4-one  
1H NMR at 400.15 MHz in CD3CN

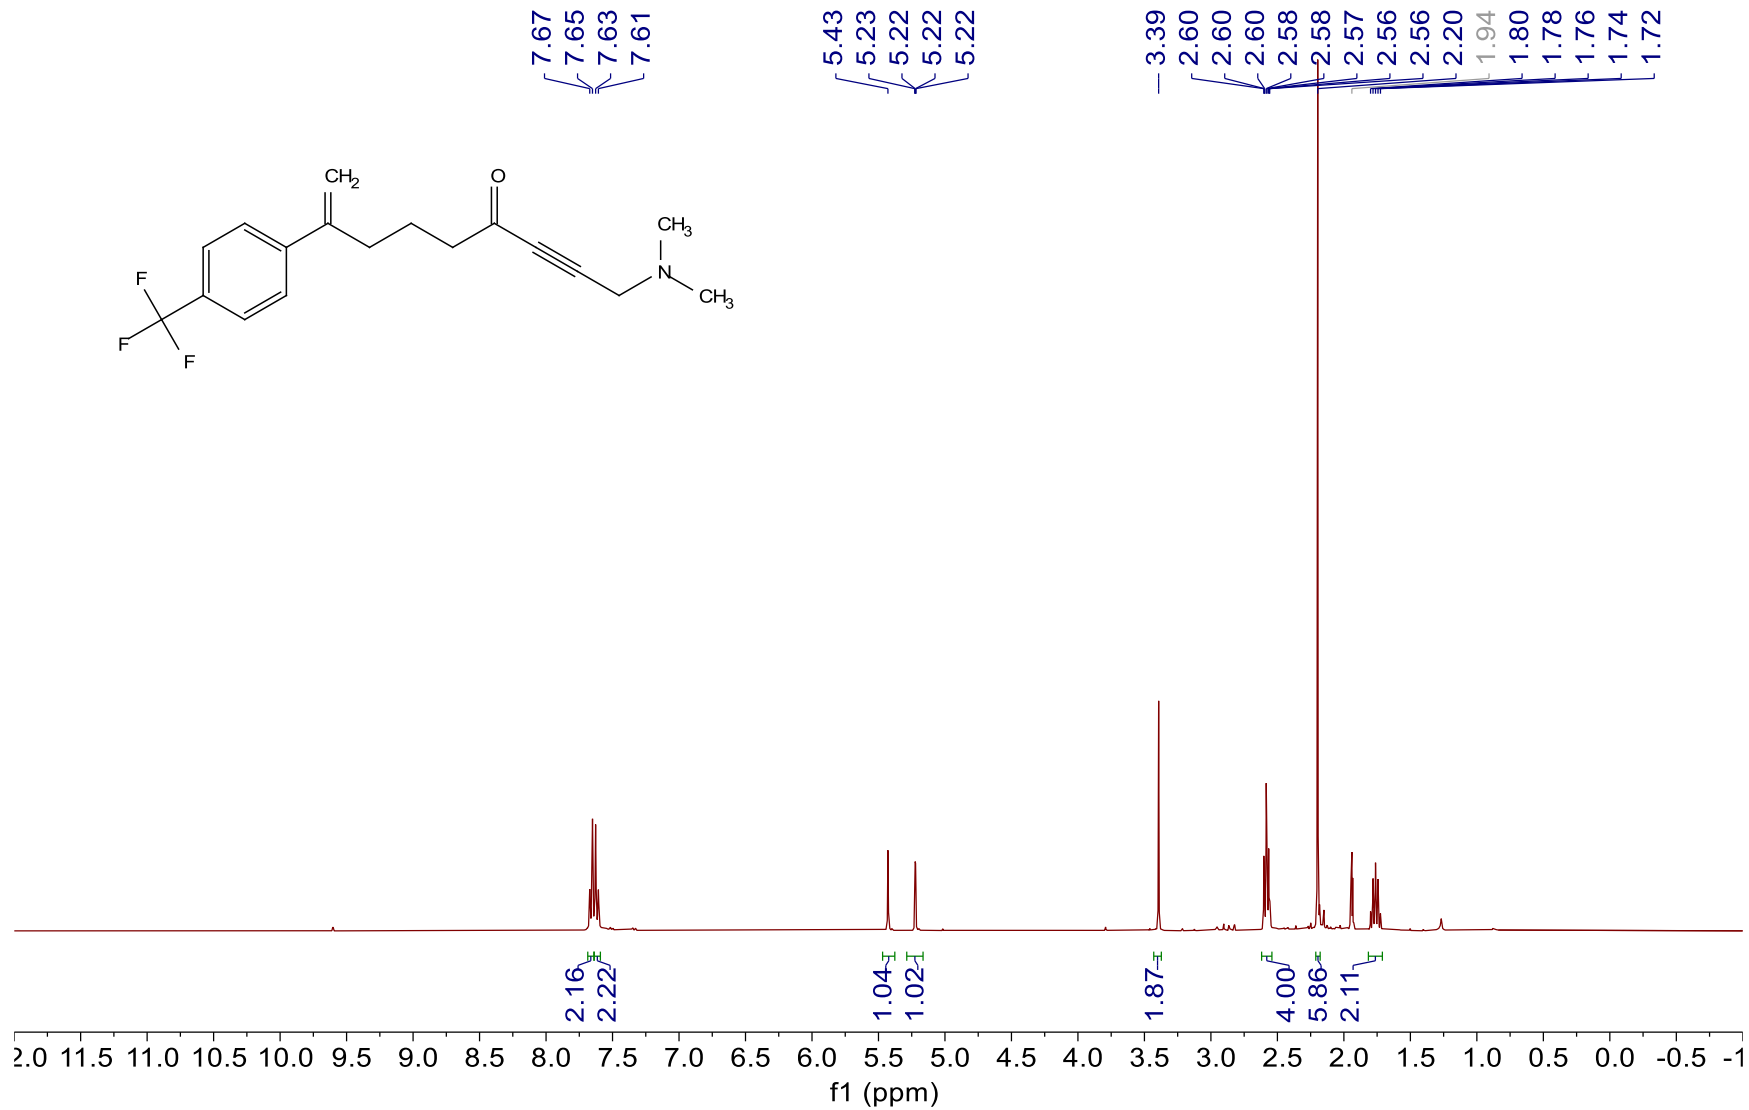

1k 4'-(trifluoromethyl)-3,4,5,6-tetrahydro-[1,1'-biphenyl]-3-ol  
19F NMR at 376.48 MHz in CD3CN

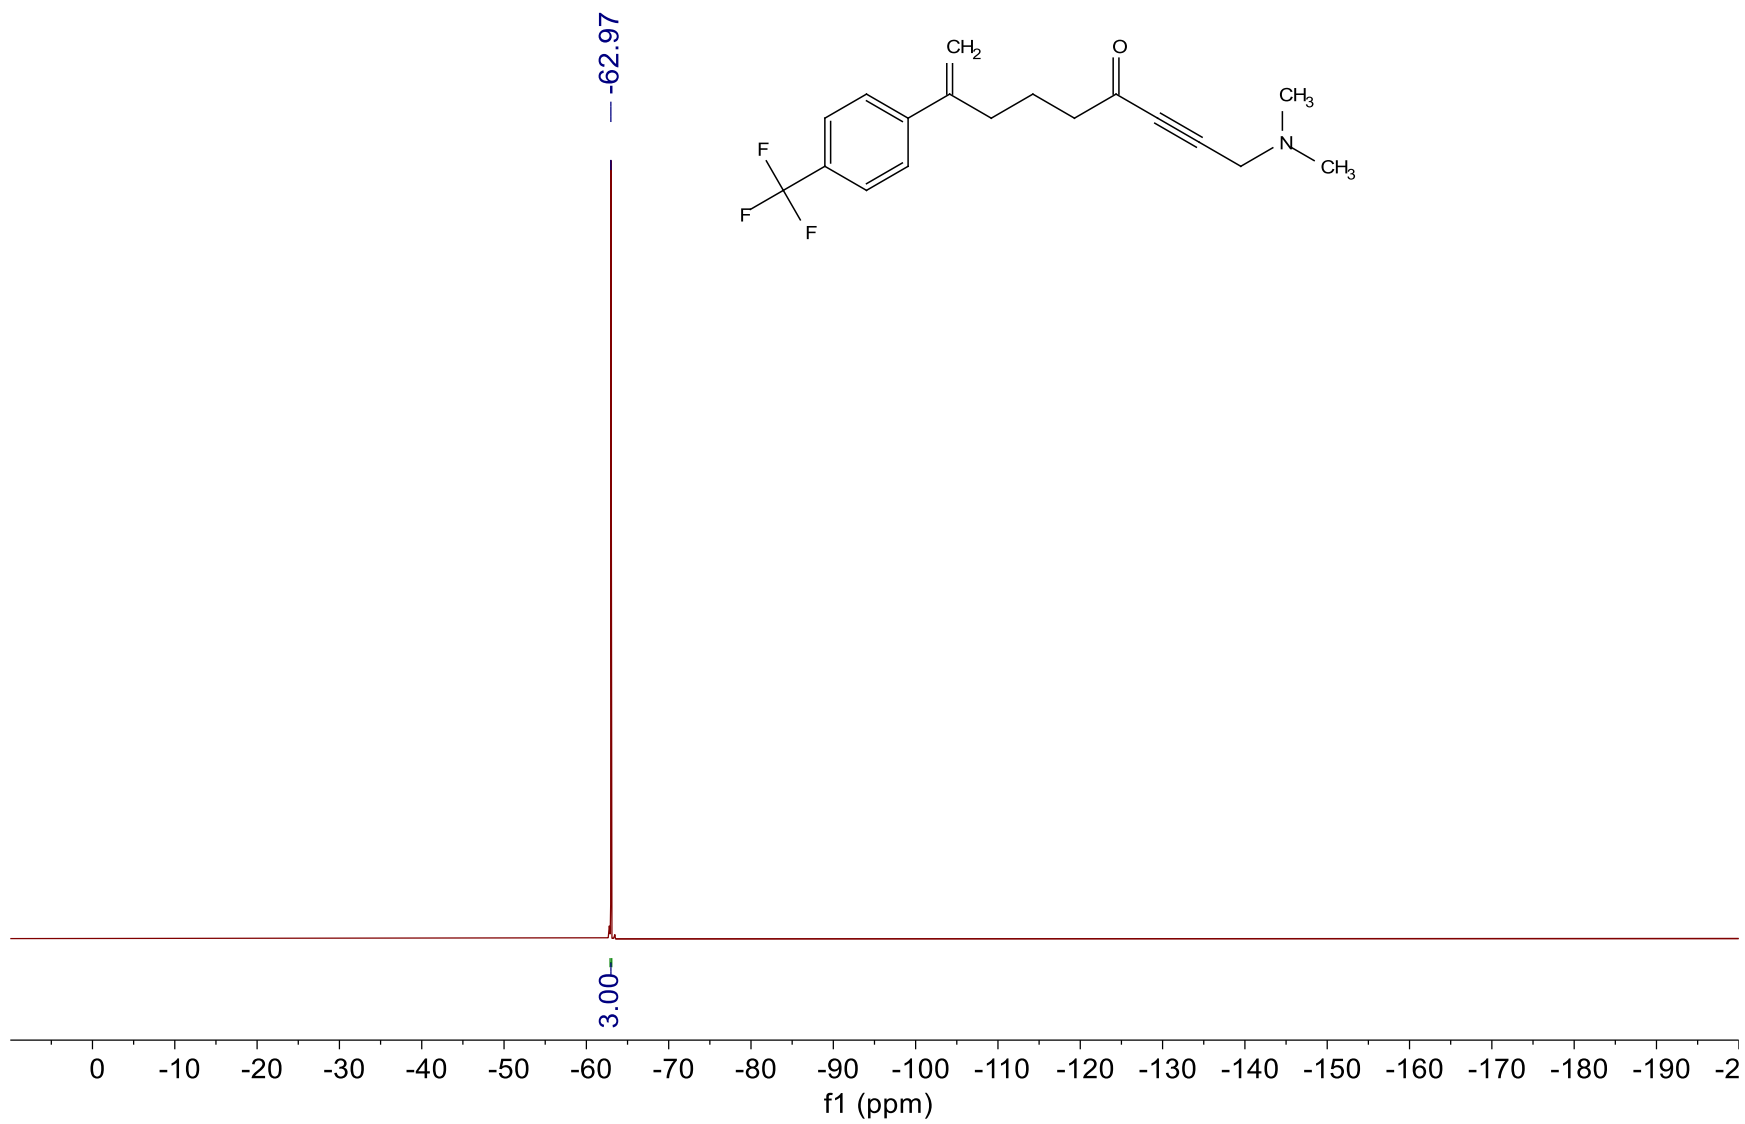

2g 1-(dimethylamino)-8-(4-(trifluoromethyl)phenyl)non-8-en-2-yn-4-one  
13C NMR at 100.63 MHz in CD3CN

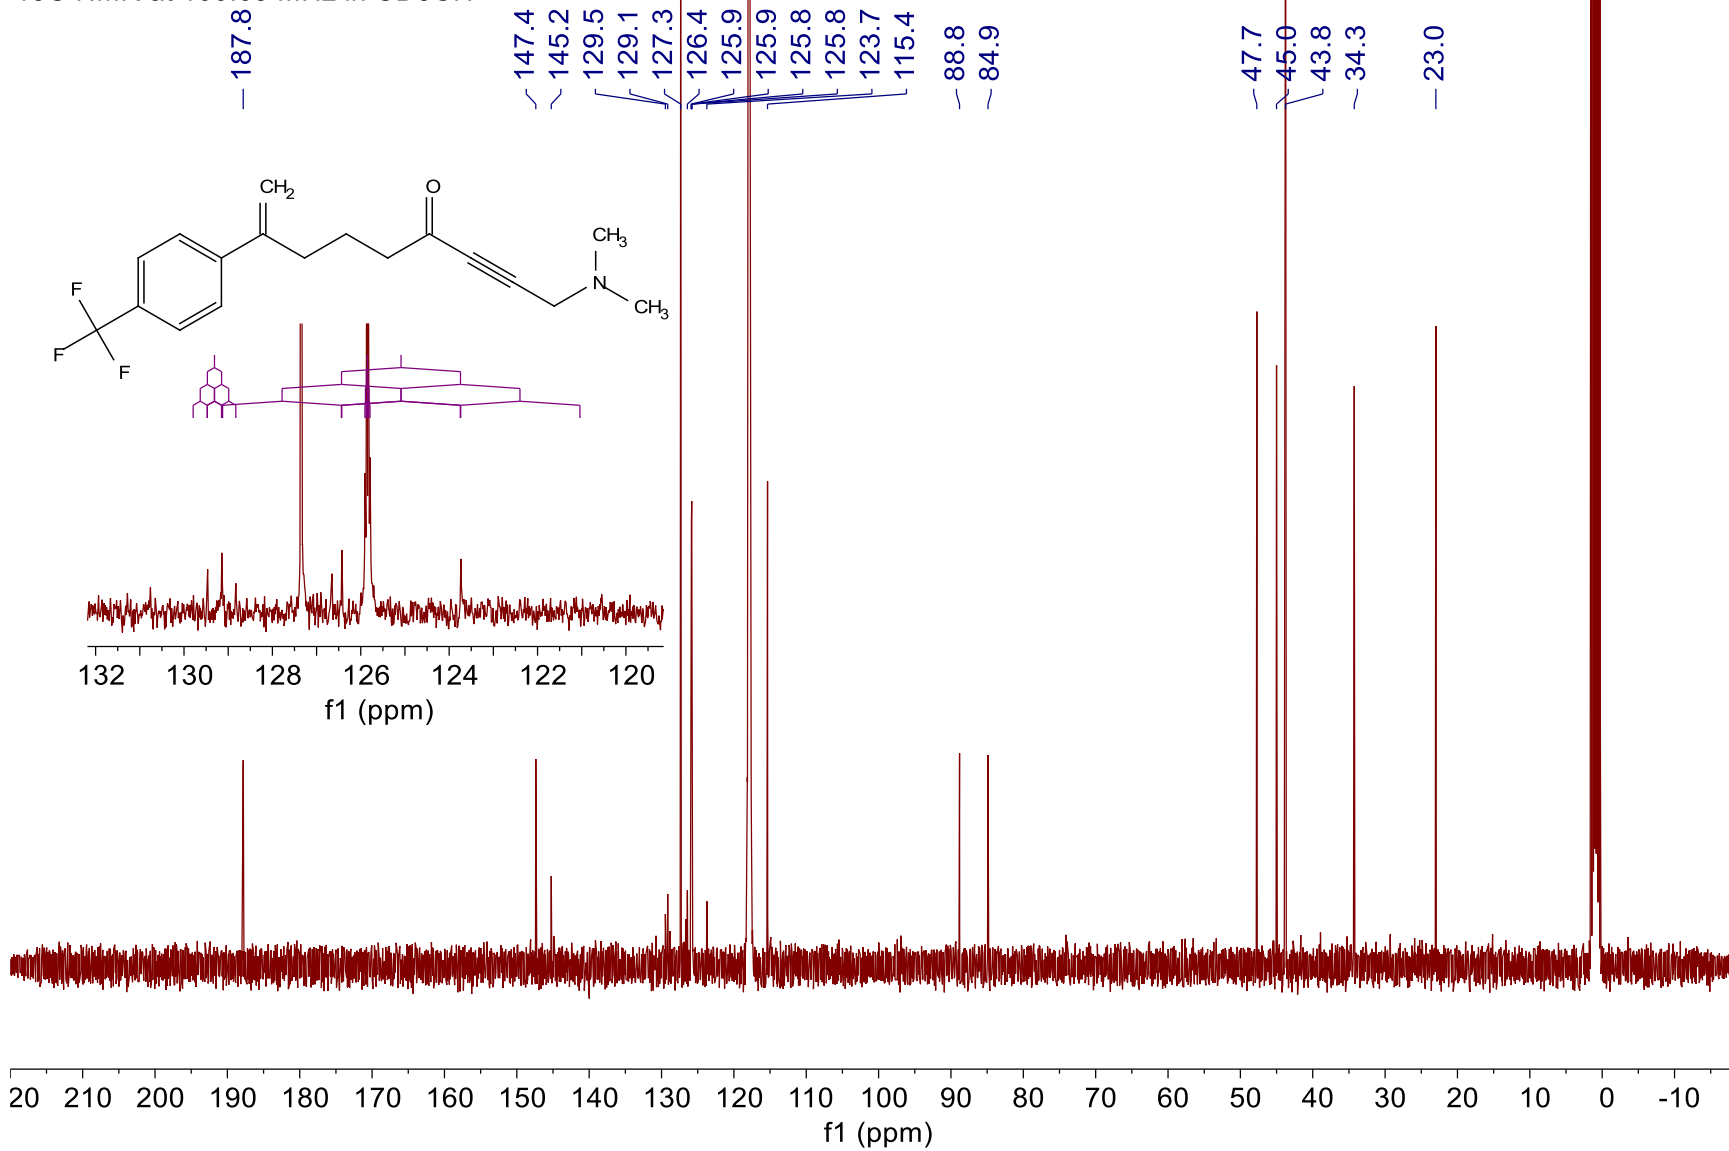

2h 8-phenylnon-8-en-2-yn-4-one  
1H NMR at 400.15 MHz in CD<sub>2</sub>Cl<sub>2</sub>

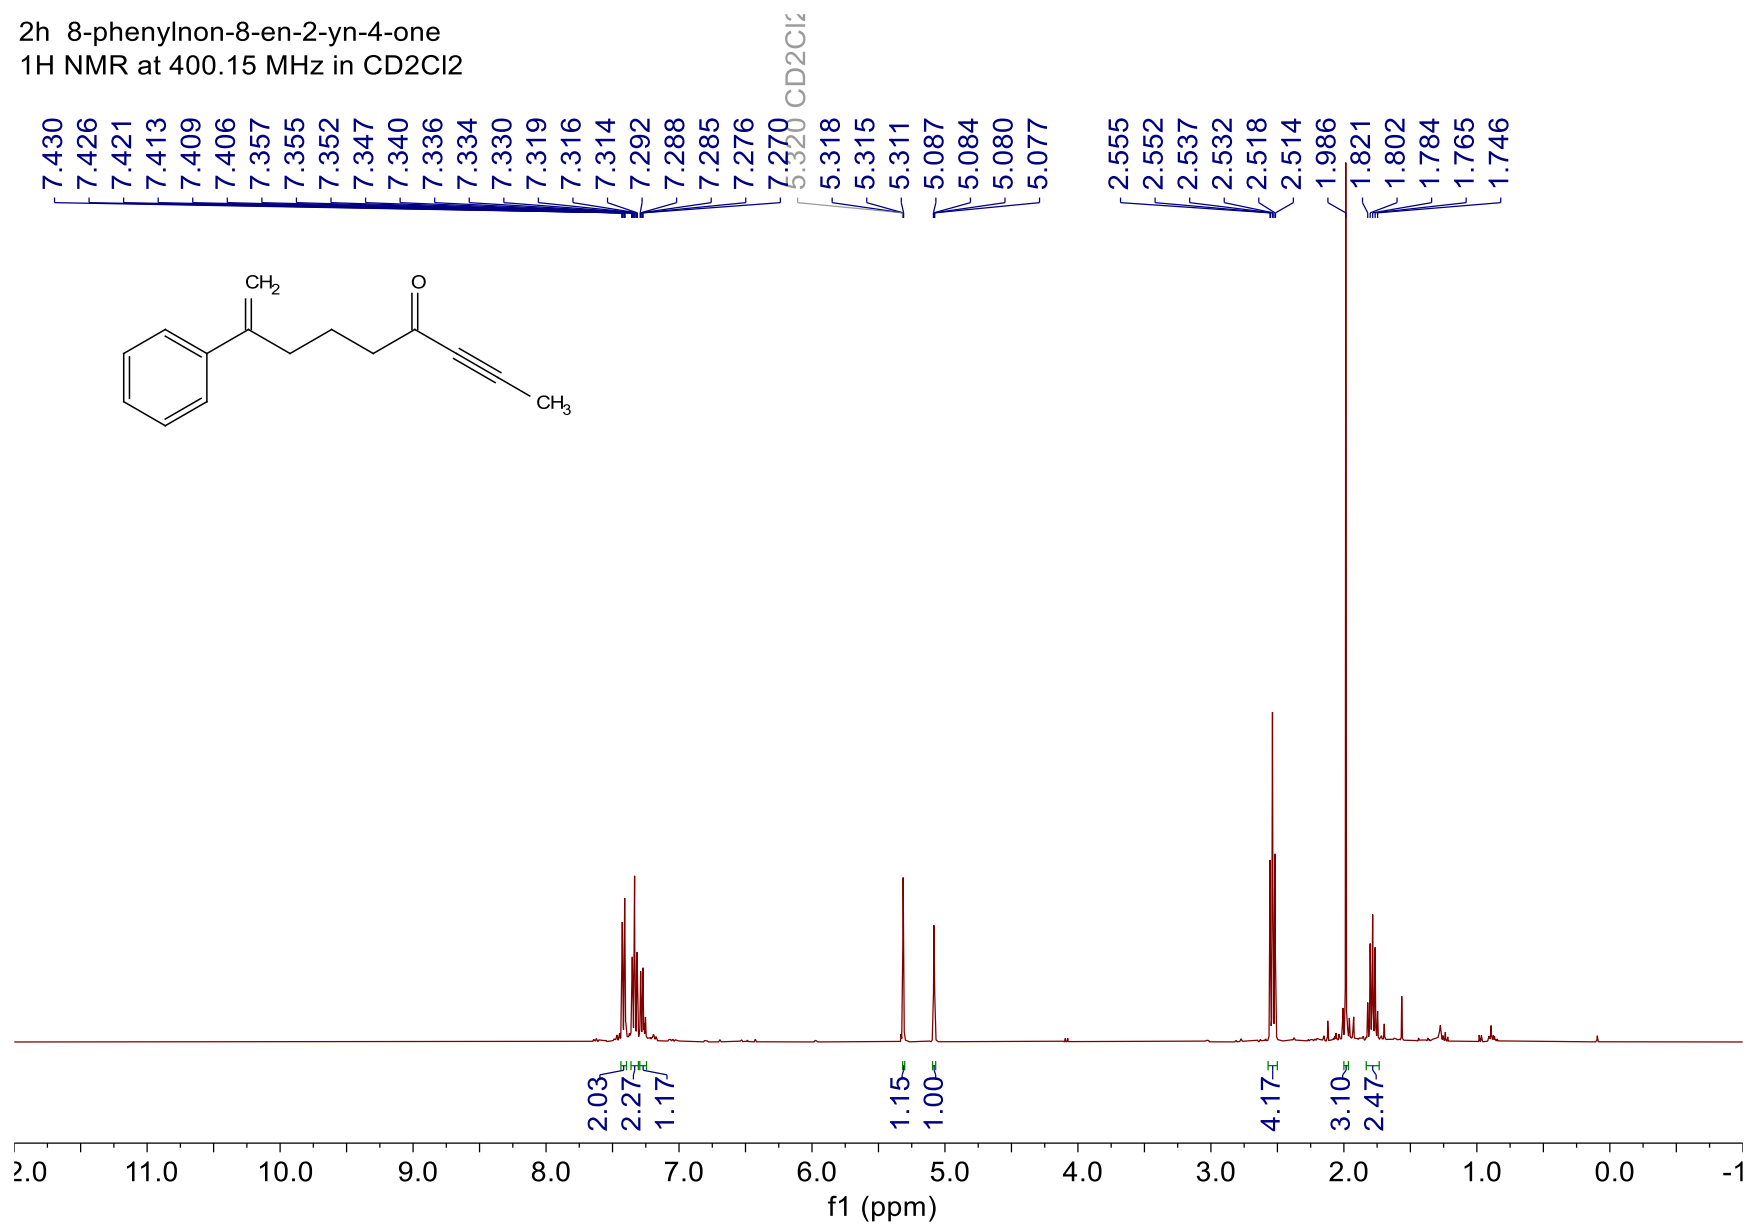

2h 8-phenylnon-8-en-2-yn-4-one  
13C NMR at 100.63 MHz in CD2Cl2

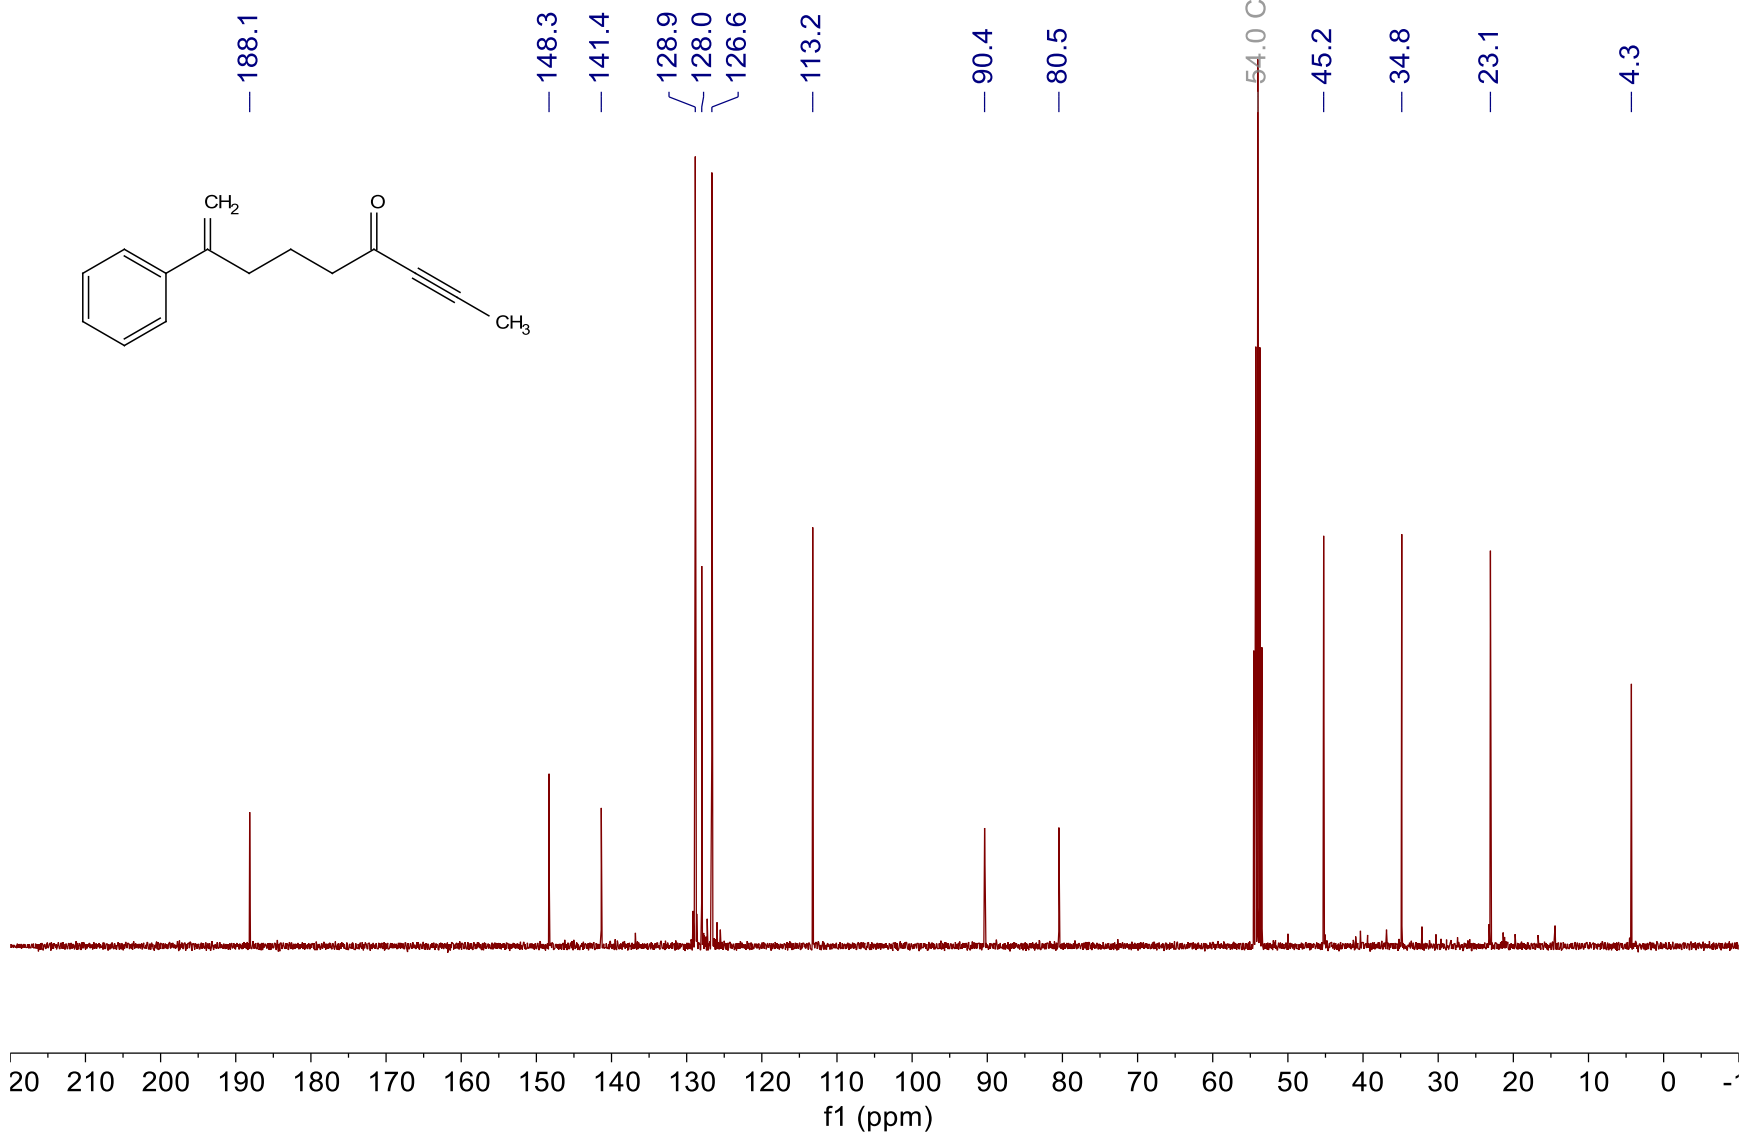

## 2h 8-phenylnon-8-en-2-yn-4-one

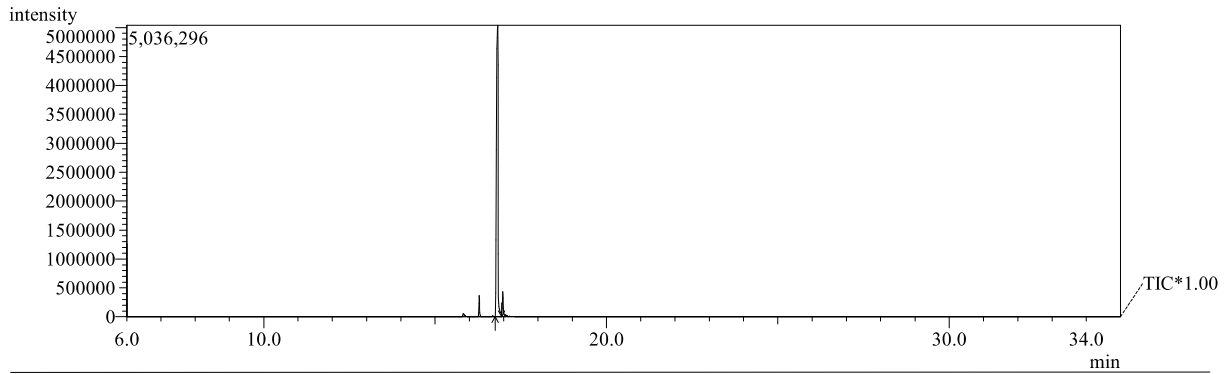

Spectrum

MassPeaks:95  
RawMode:Averaged 16.8-16.8(1299-1301) BasePeak:129(598851)  
BG Mode:Calc. from Peak

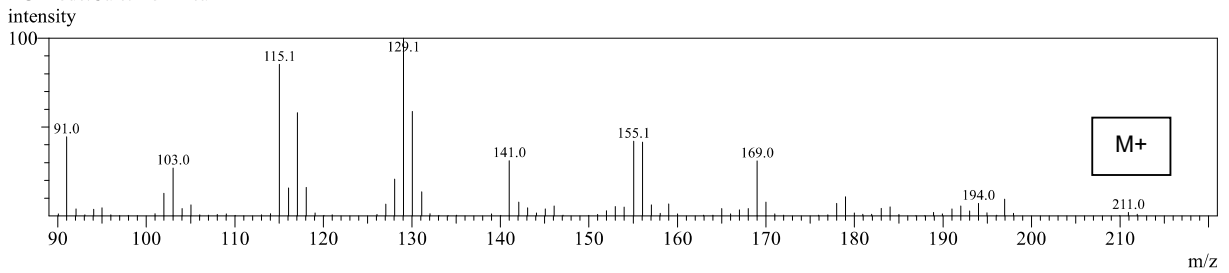

2i 7-(4-(trifluoromethyl)phenyl)oct-7-en-1-yn-3-one  
1H NMR at 400.15 MHz in CD2Cl2

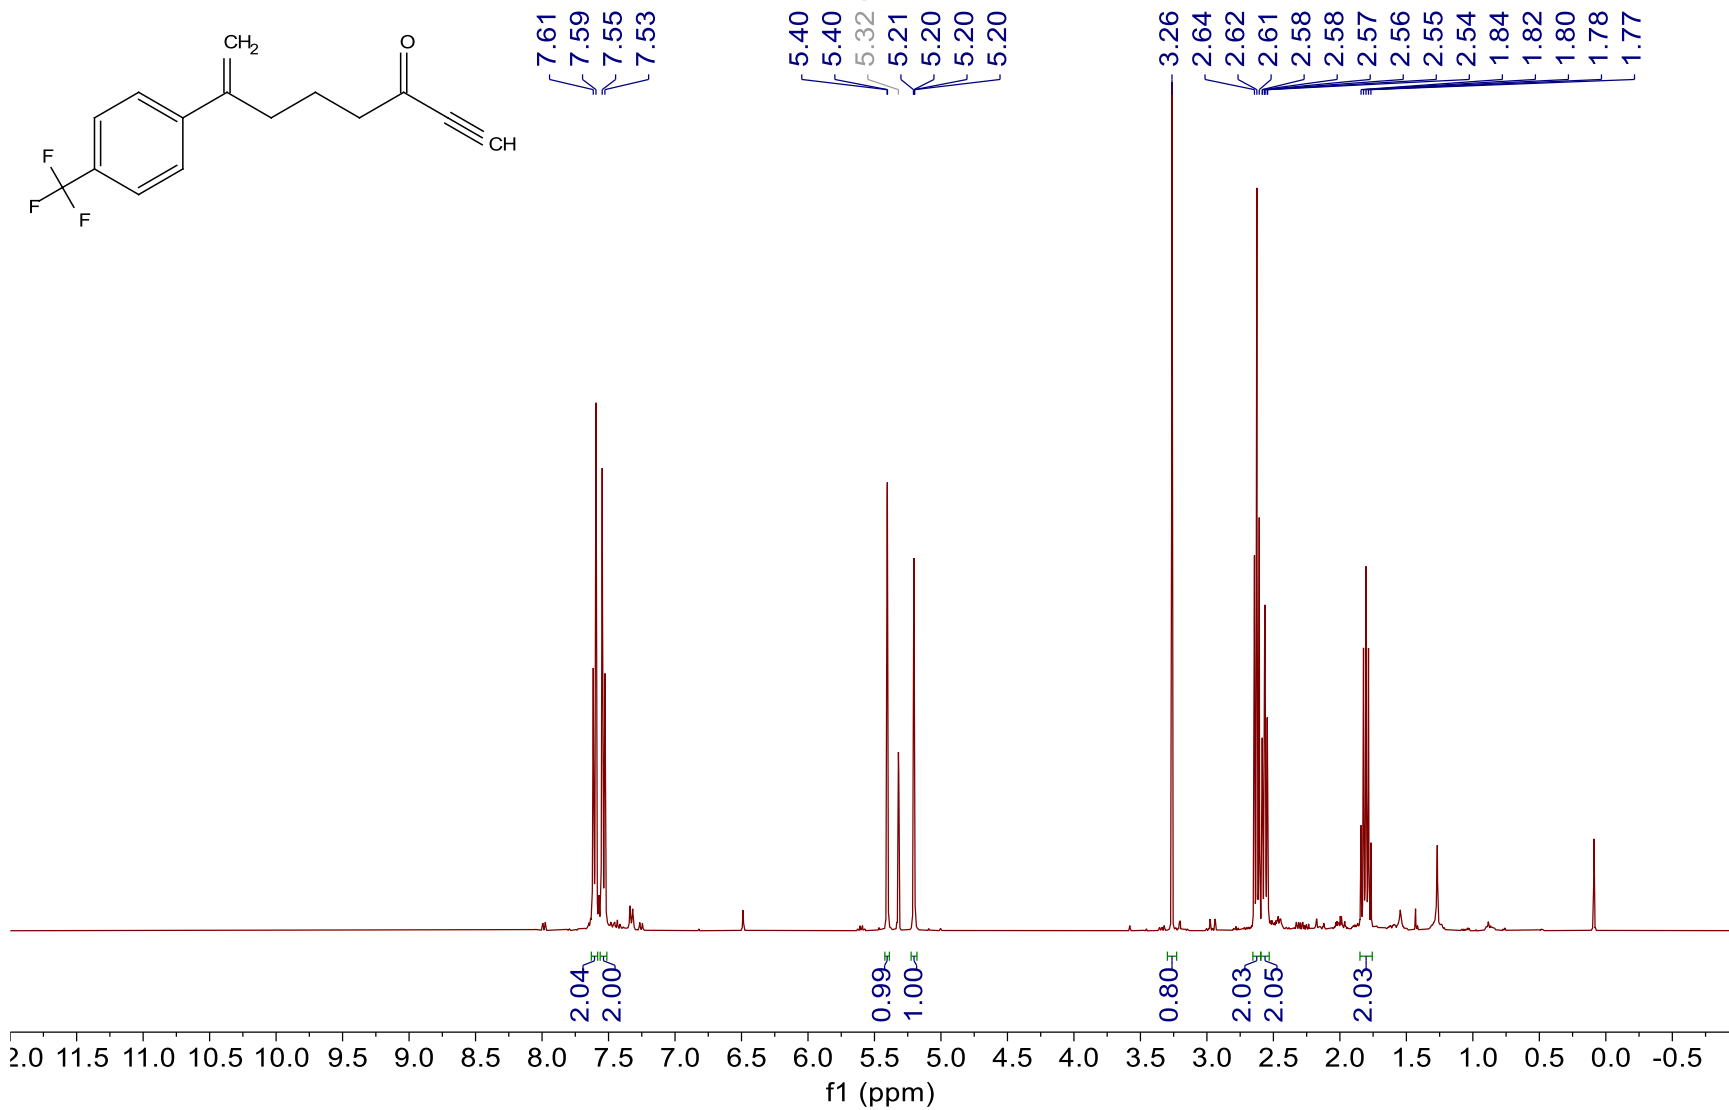

2i 7-(4-(trifluoromethyl)phenyl)oct-7-en-1-yn-3-one  
19F NMR at 376.48 MHz in CD2Cl2

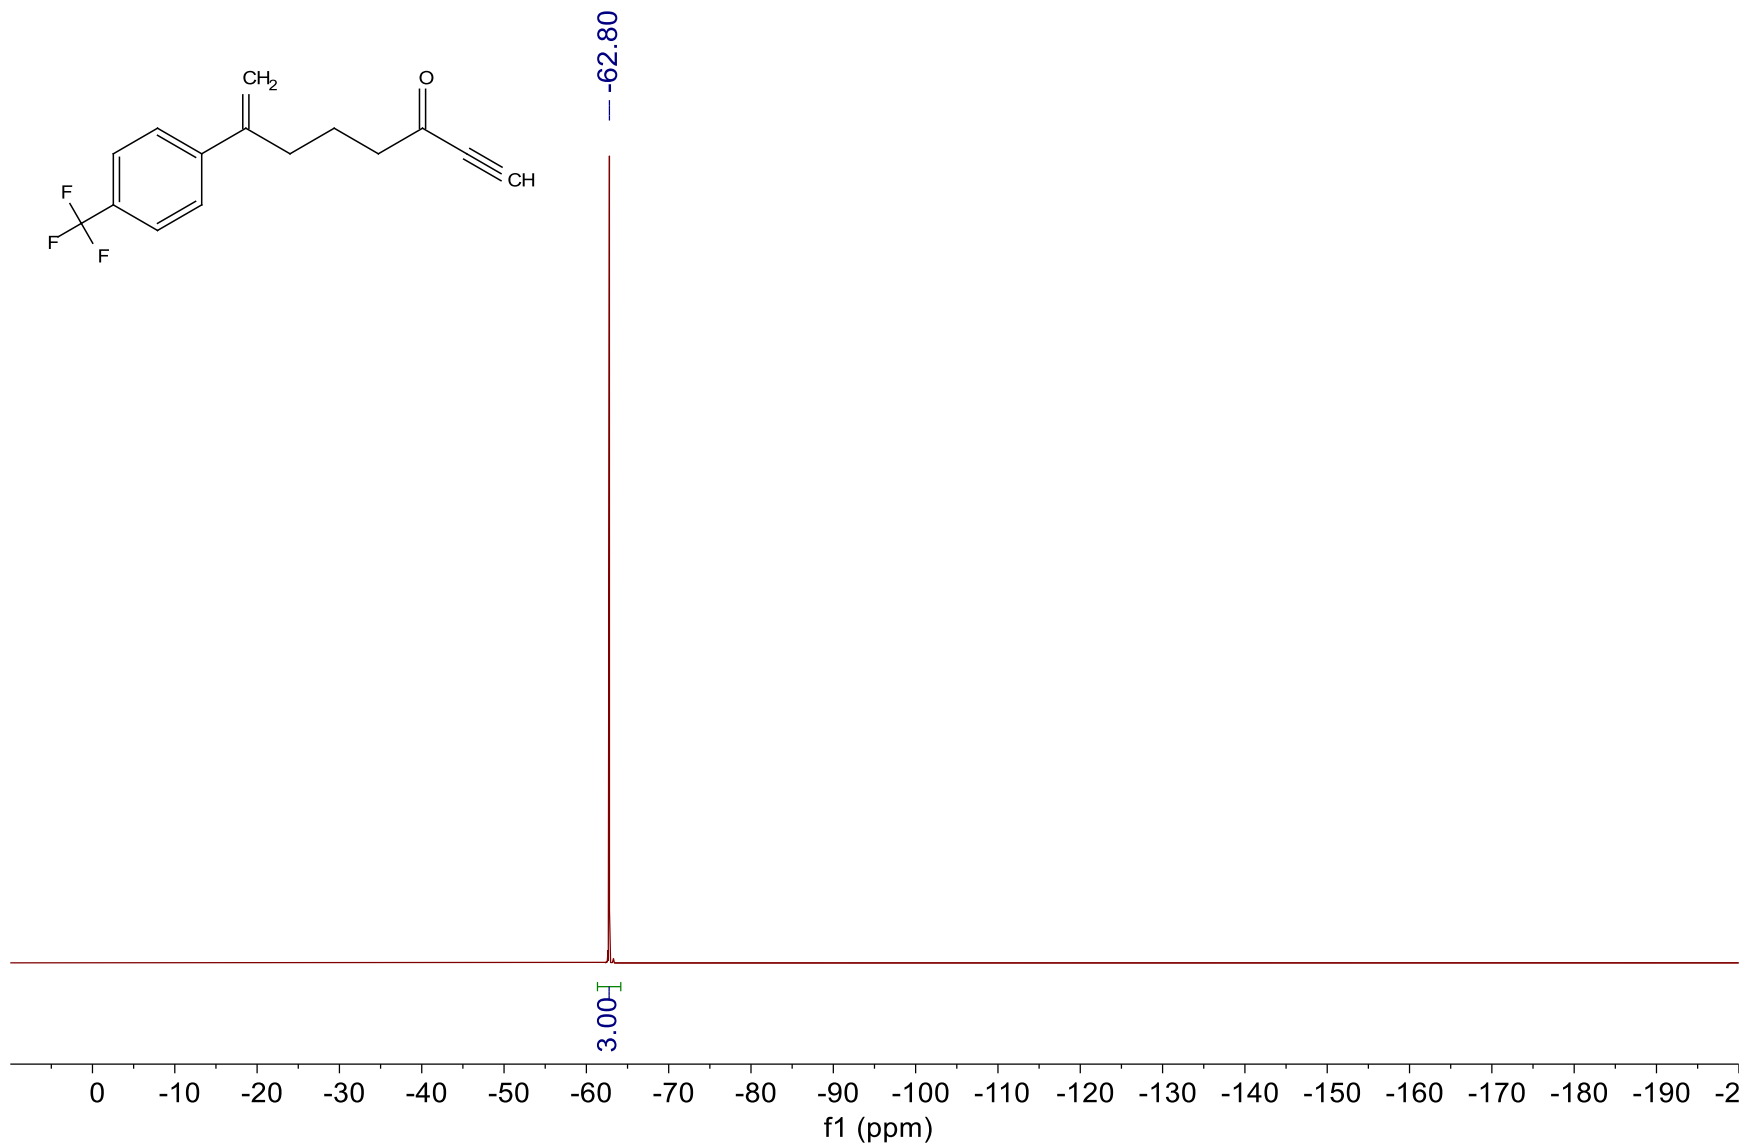



2i 7-(4-(trifluoromethyl)phenyl)oct-7-en-1-yn-3-one  
13C NMR at 100.63 MHz in CD2Cl2

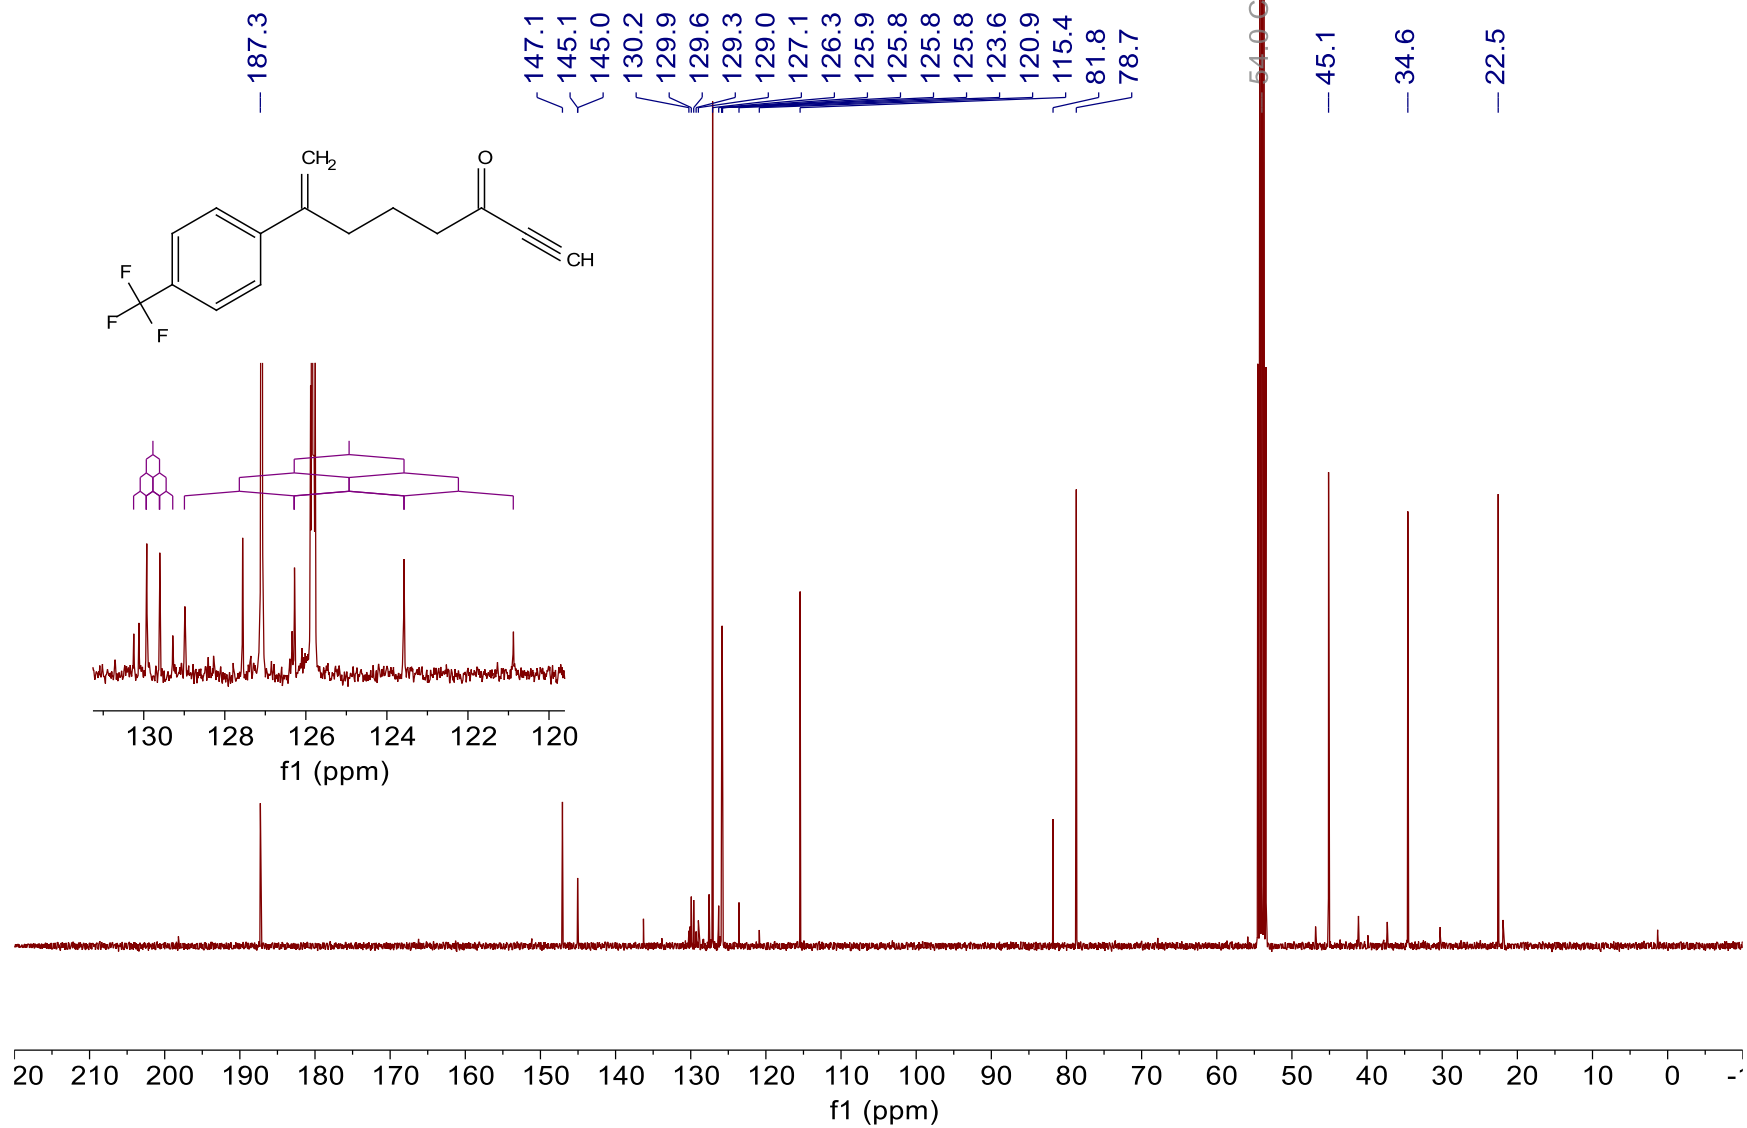

## 2i 7-(4-(trifluoromethyl)phenyl)oct-7-en-1-yn-3-one

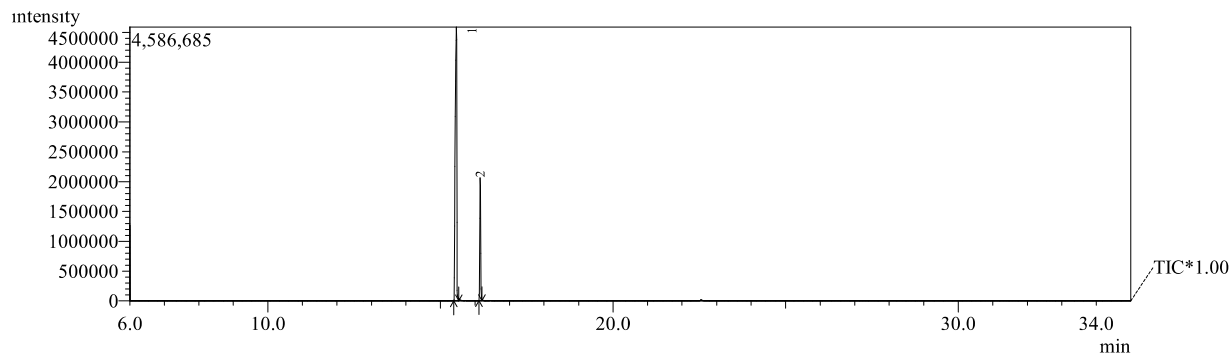

Spectrum

Line#:1 R.Time:15.5(Scan#:1136)  
MassPeaks:150  
RawMode:Averaged 15.5-15.5(1135-1137) BasePeak:129(845373)  
BG Mode:Calc. from Peak

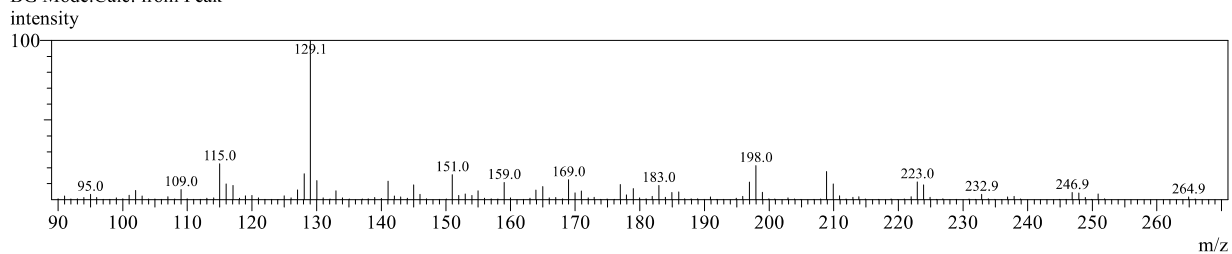

Line#:2 R.Time:16.2(Scan#:1219)  
MassPeaks:134  
RawMode:Averaged 16.1-16.2(1218-1220) BasePeak:141(245864)  
BG Mode:Calc. from Peak

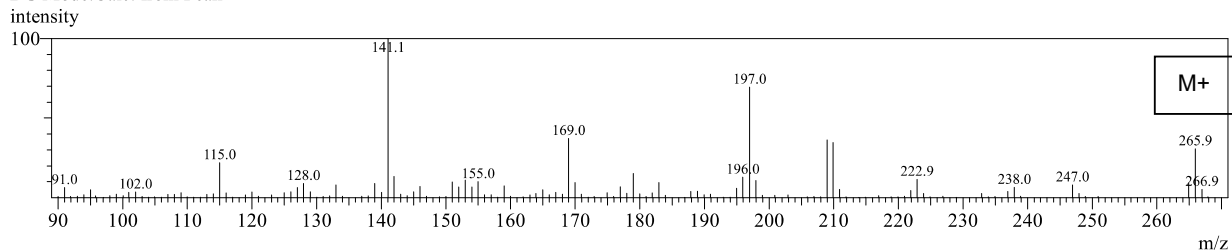

2j 5-(p-tolyl)hex-5-enal  
1H NMR at 400.15 MHz in CDCl3

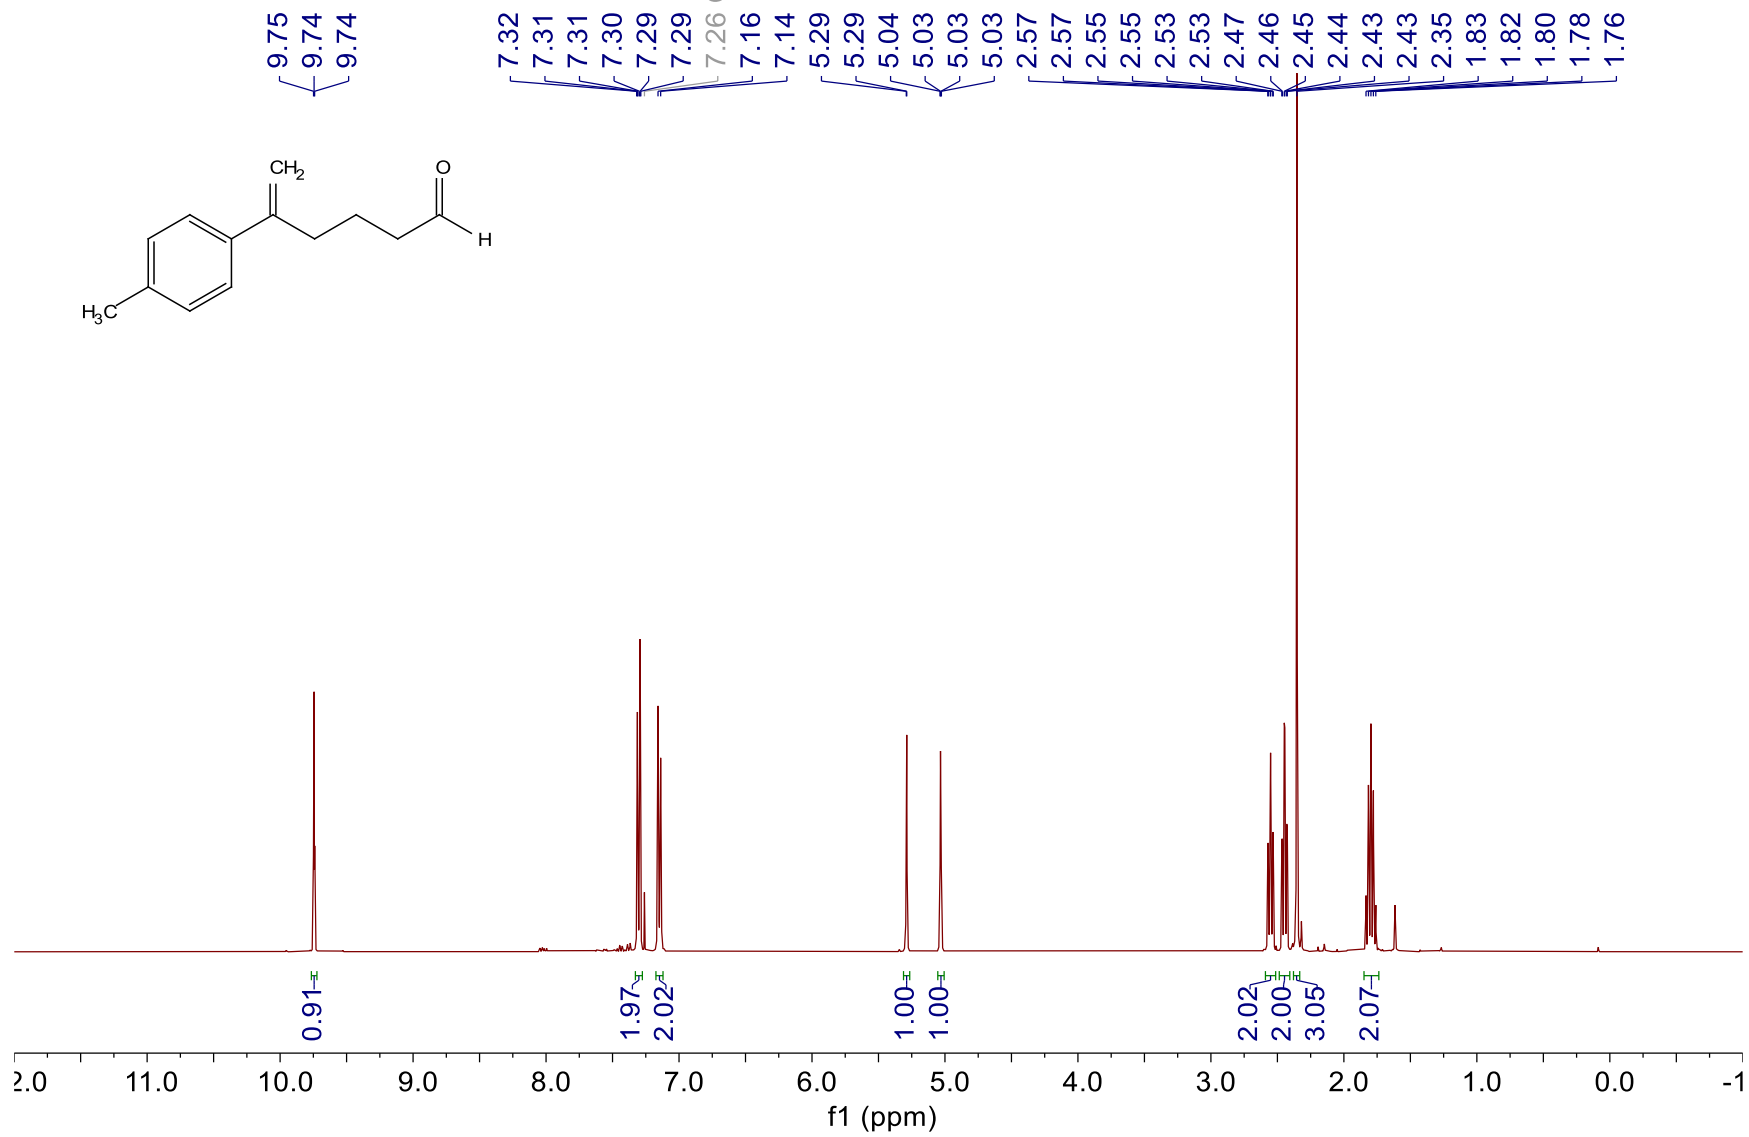

2j 5-(p-tolyl)hex-5-enal  
13C NMR at 100.63 MHz in CDCl3

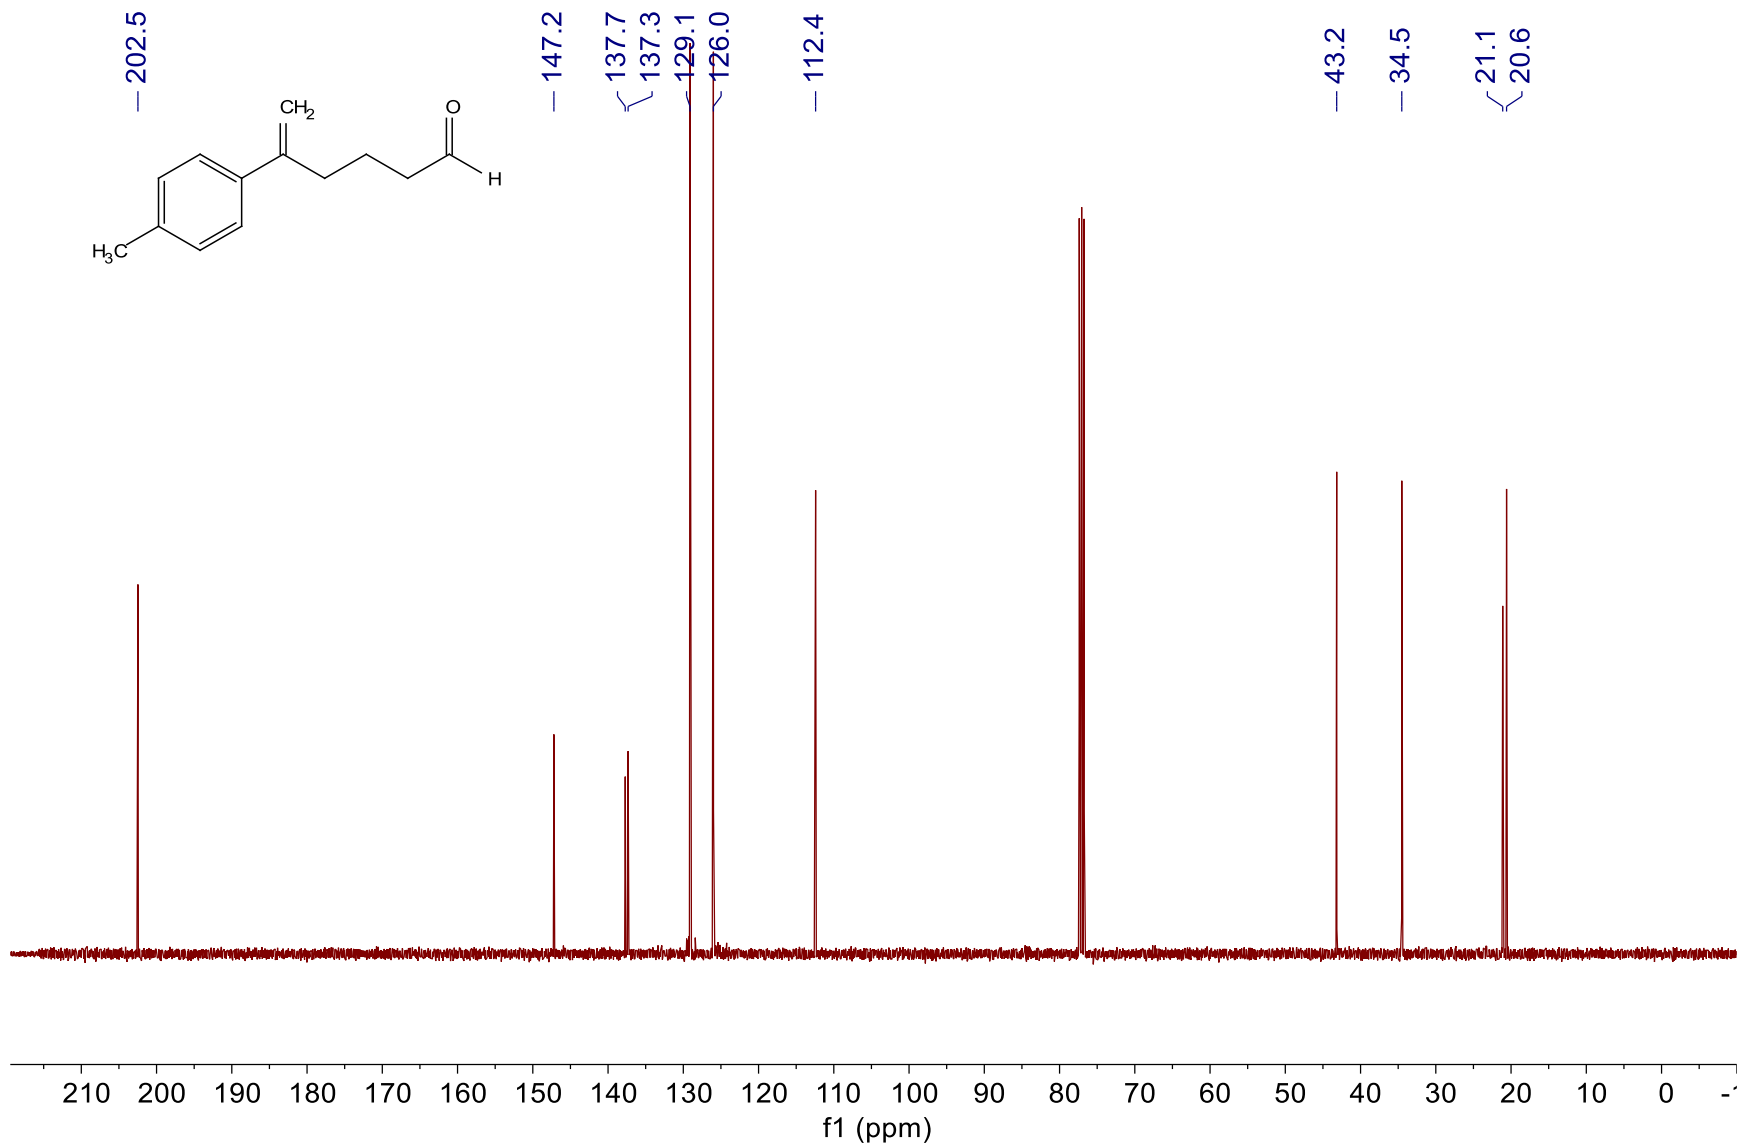

## 2j 5-(p-tolyl)hex-5-enal

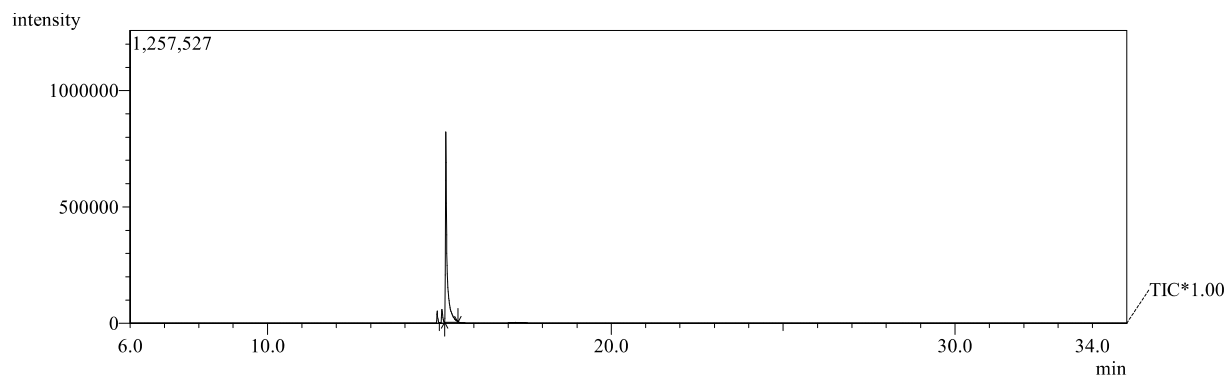

Spectrum

MassPeaks:47  
RawMode:Averaged 15.2-15.2(1102-1104) BasePeak:132(167250)  
BG Mode:Calc. from Peak

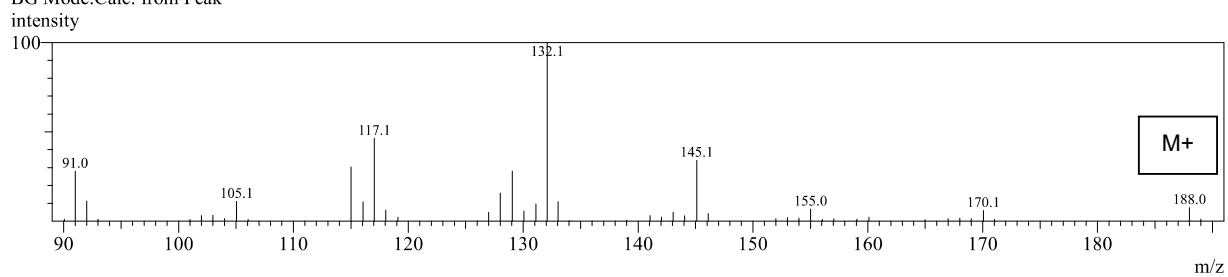

2k 5-(4-(trifluoromethyl)phenyl)hex-5-enal  
1H NMR at 400.15 MHz in CD<sub>2</sub>Cl<sub>2</sub>

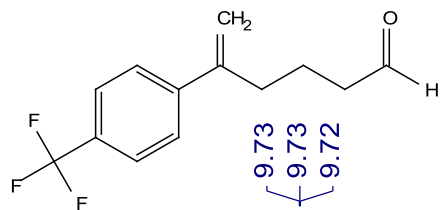

9.73  
9.73  
9.72

7.62  
7.60  
7.55  
7.53

5.40  
5.32 CD<sub>2</sub>Cl<sub>2</sub>  
5.20  
5.20  
5.20  
5.20  
2.59  
2.59  
2.57  
2.57  
2.55  
2.55  
2.48  
2.47  
2.46  
2.45  
2.44  
2.44  
1.80  
1.78  
1.76  
1.74  
1.72

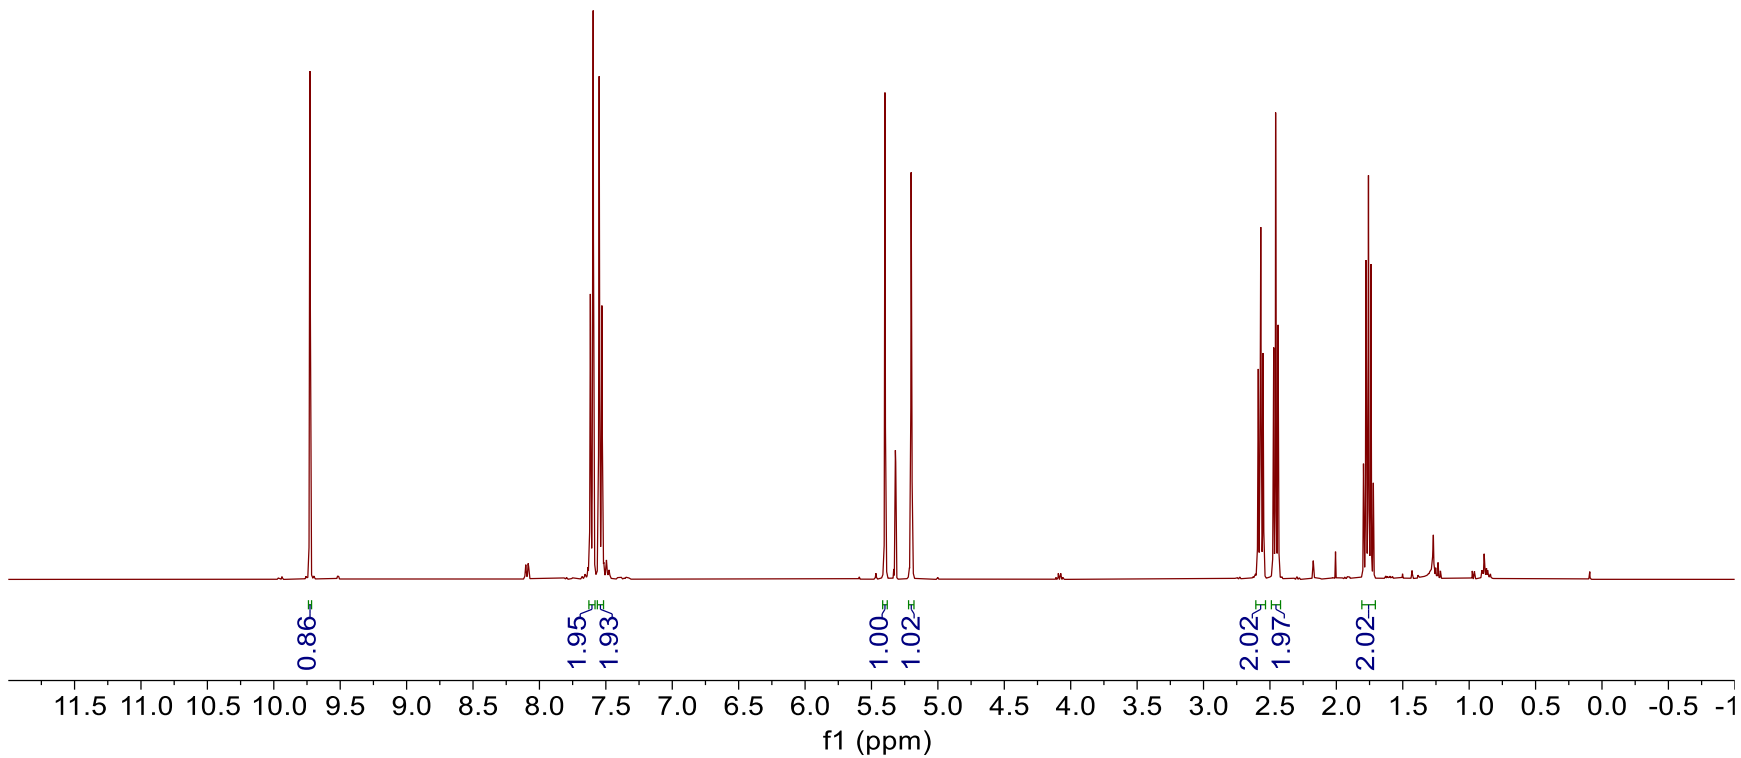

2k 5-(4-(trifluoromethyl)phenyl)hex-5-enal  
19F NMR at 376.48 MHz in CD2Cl2

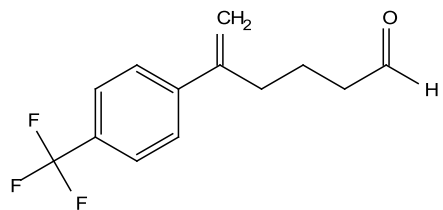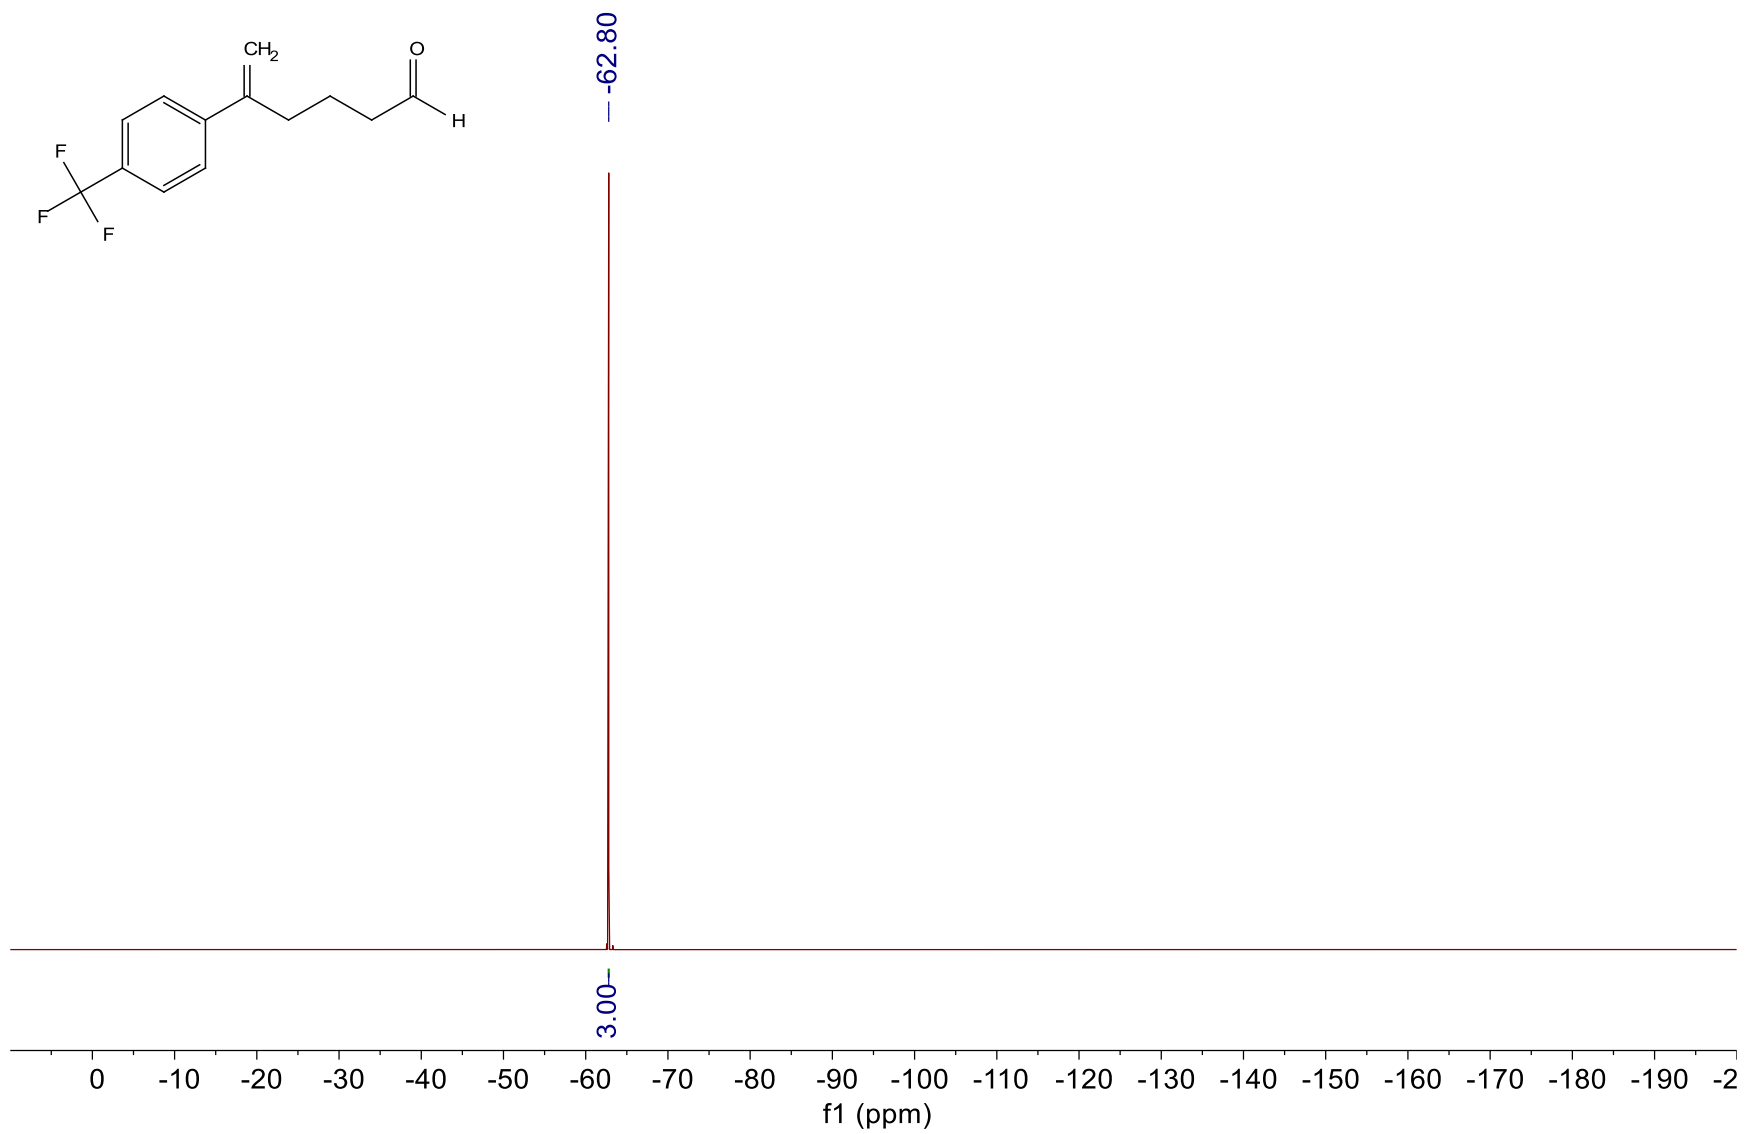

2k 5-(4-(trifluoromethyl)phenyl)hex-5-enal  
13C NMR at 100.63 MHz in CD2Cl2

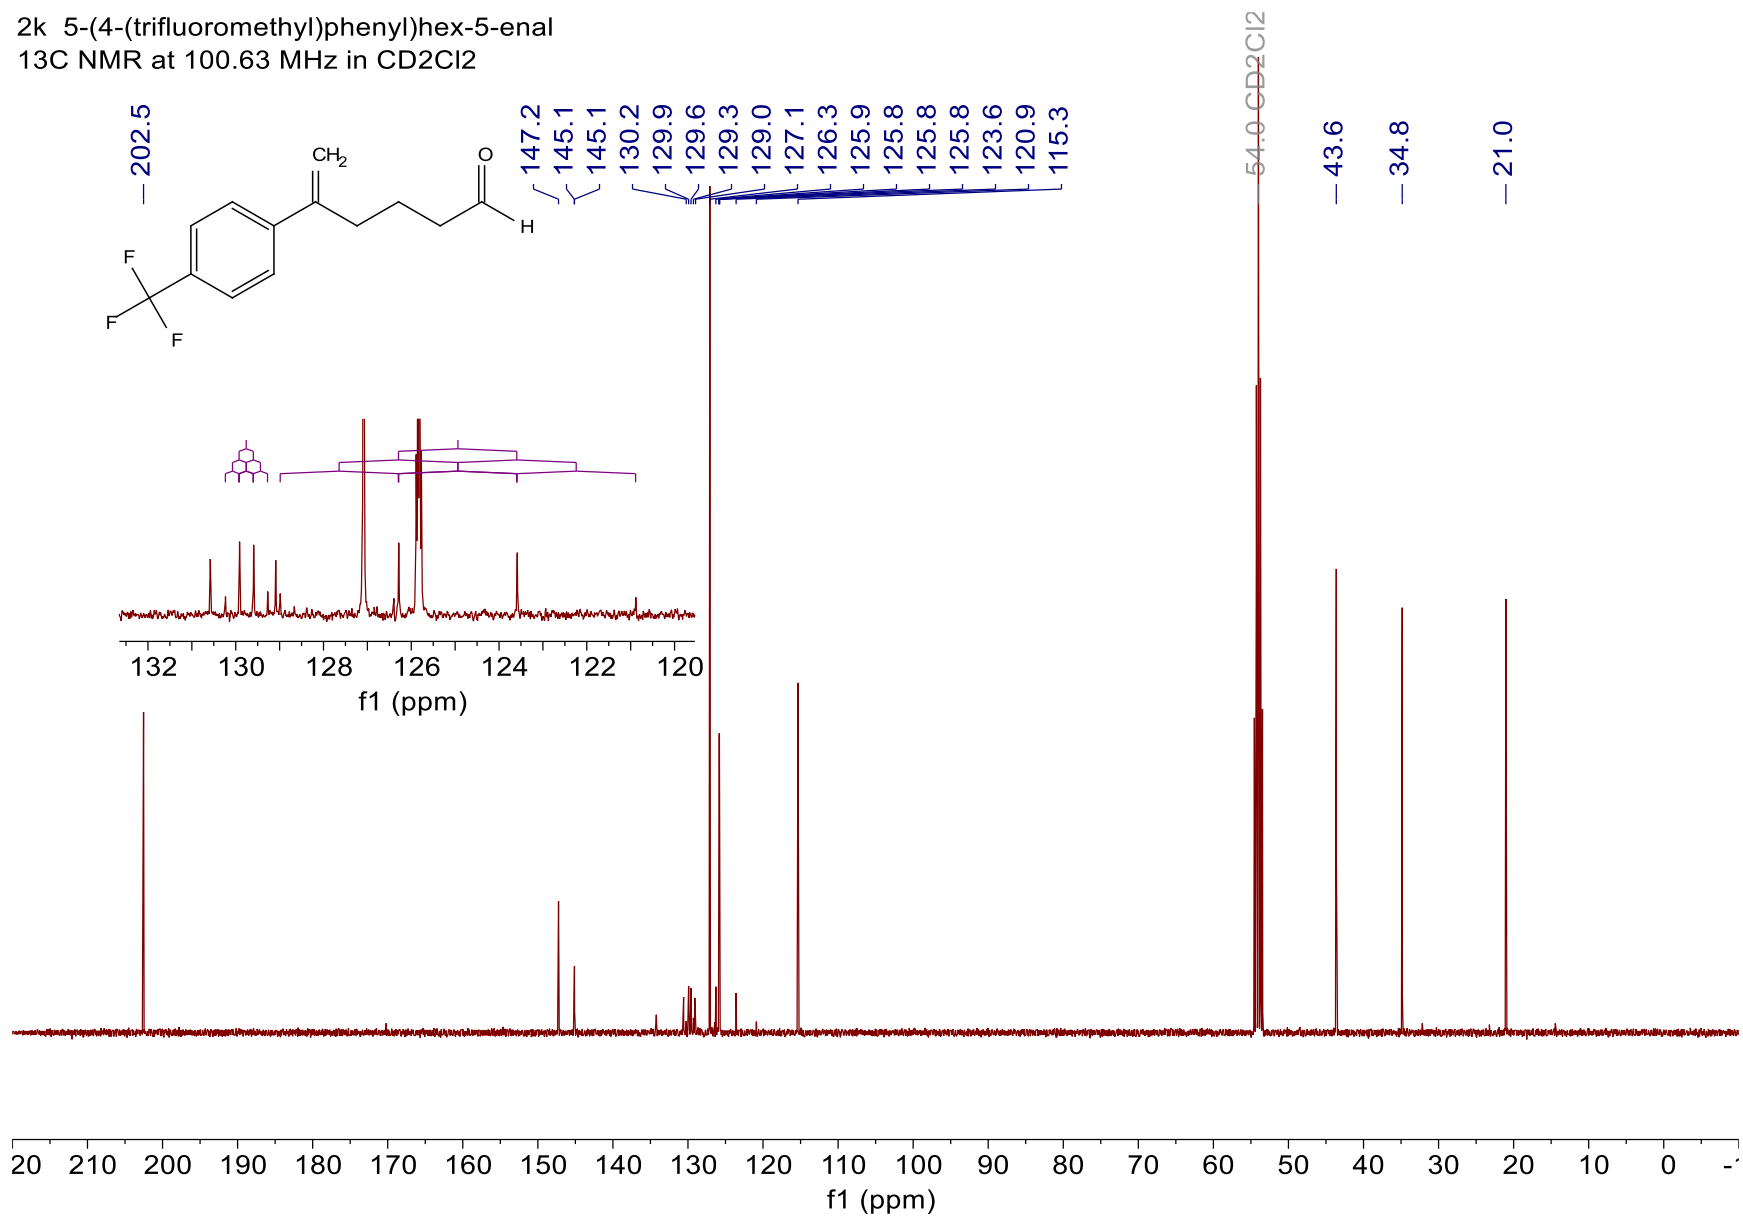



## 2k 5-(4-(trifluoromethyl)phenyl)hex-5-enal

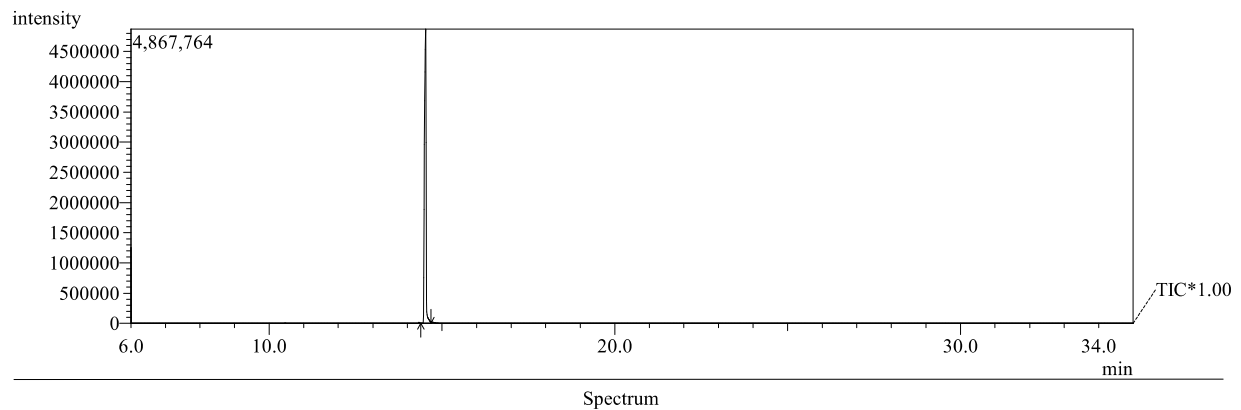

MassPeaks:127  
RawMode:Averaged 14.5-14.5(1024-1026) BasePeak:186(547107)  
BG Mode:Calc. from Peak

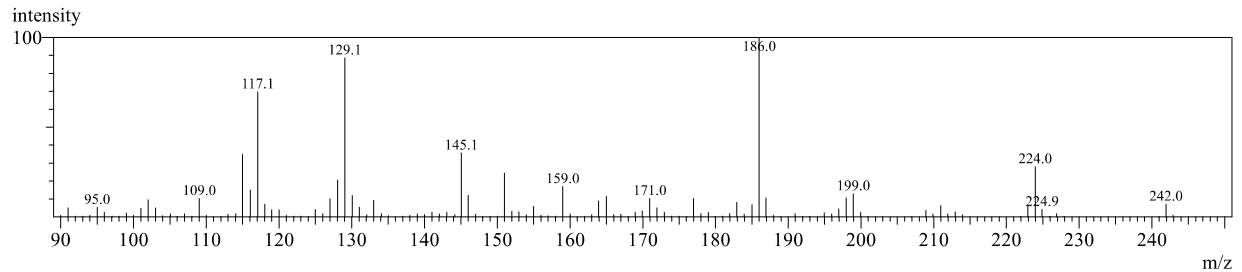

2l 5-phenylhex-5-enal  
1H NMR at 400.15 MHz in CD2Cl2

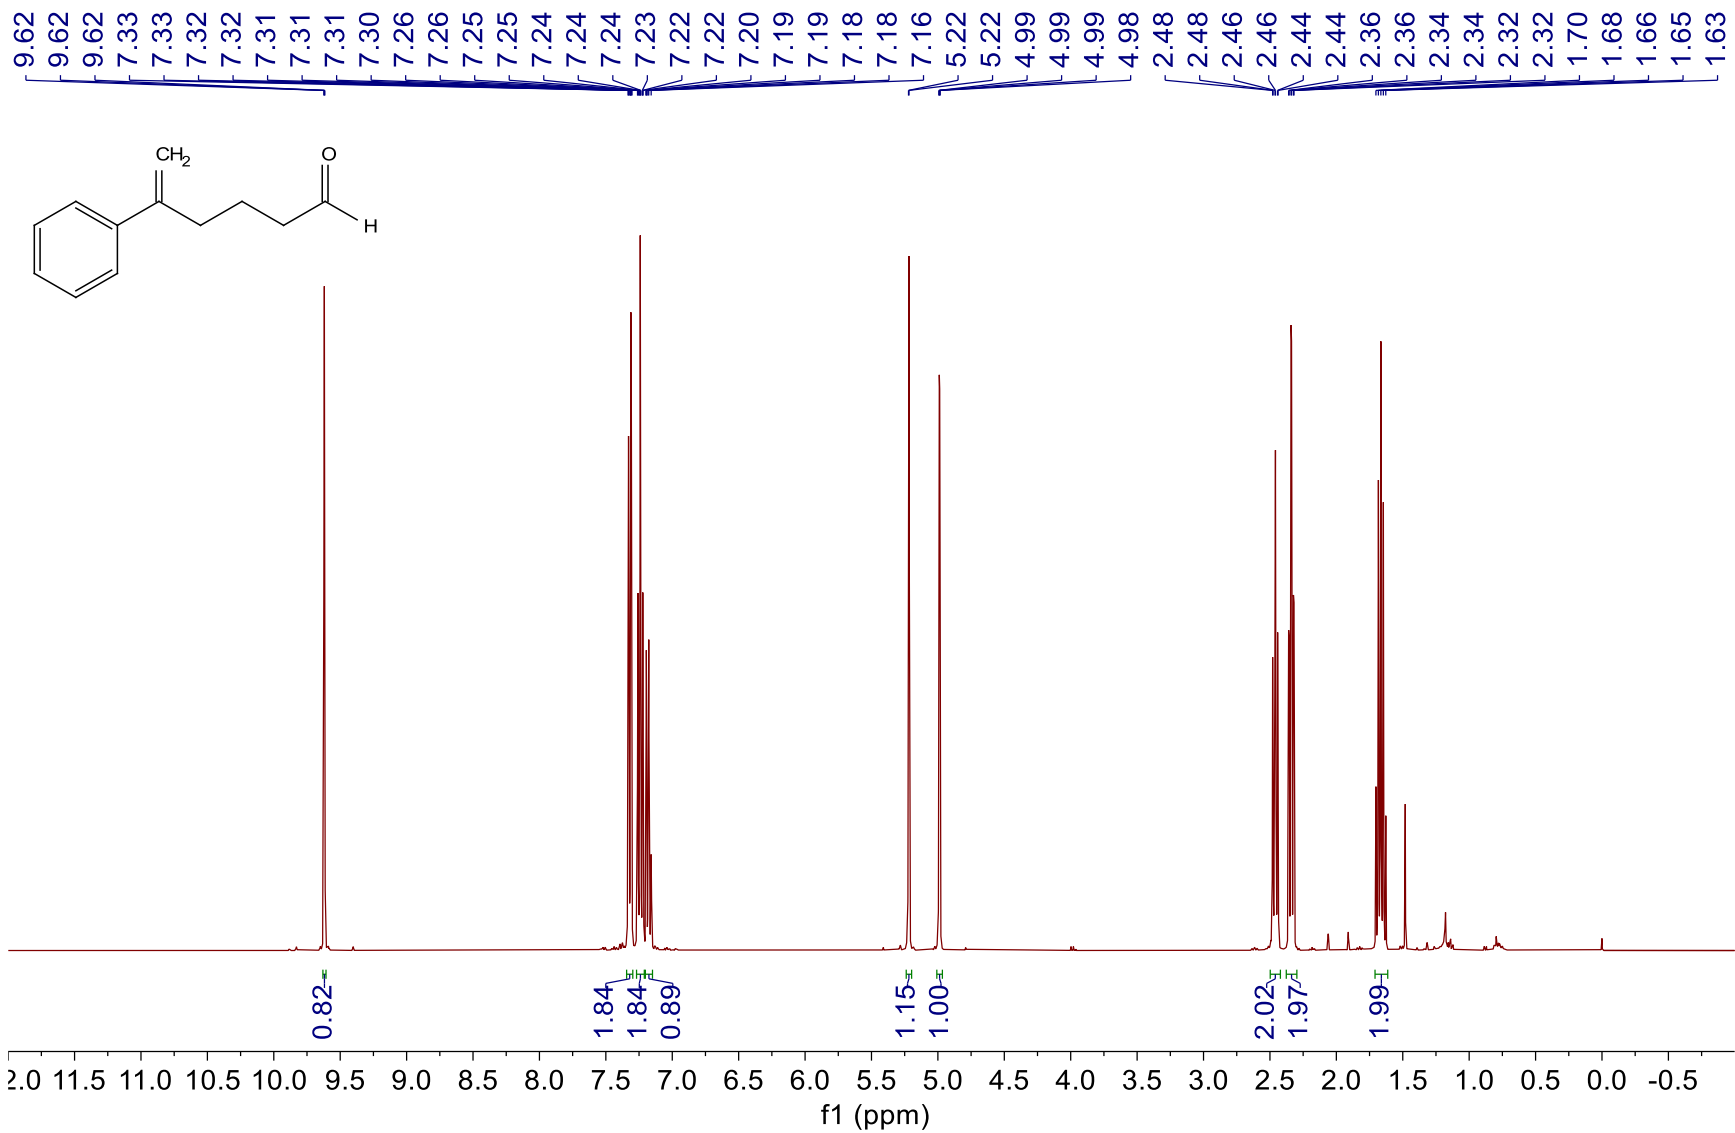

2l 5-phenylhex-5-enal  
13C NMR at 100.63 MHz in CD2Cl2

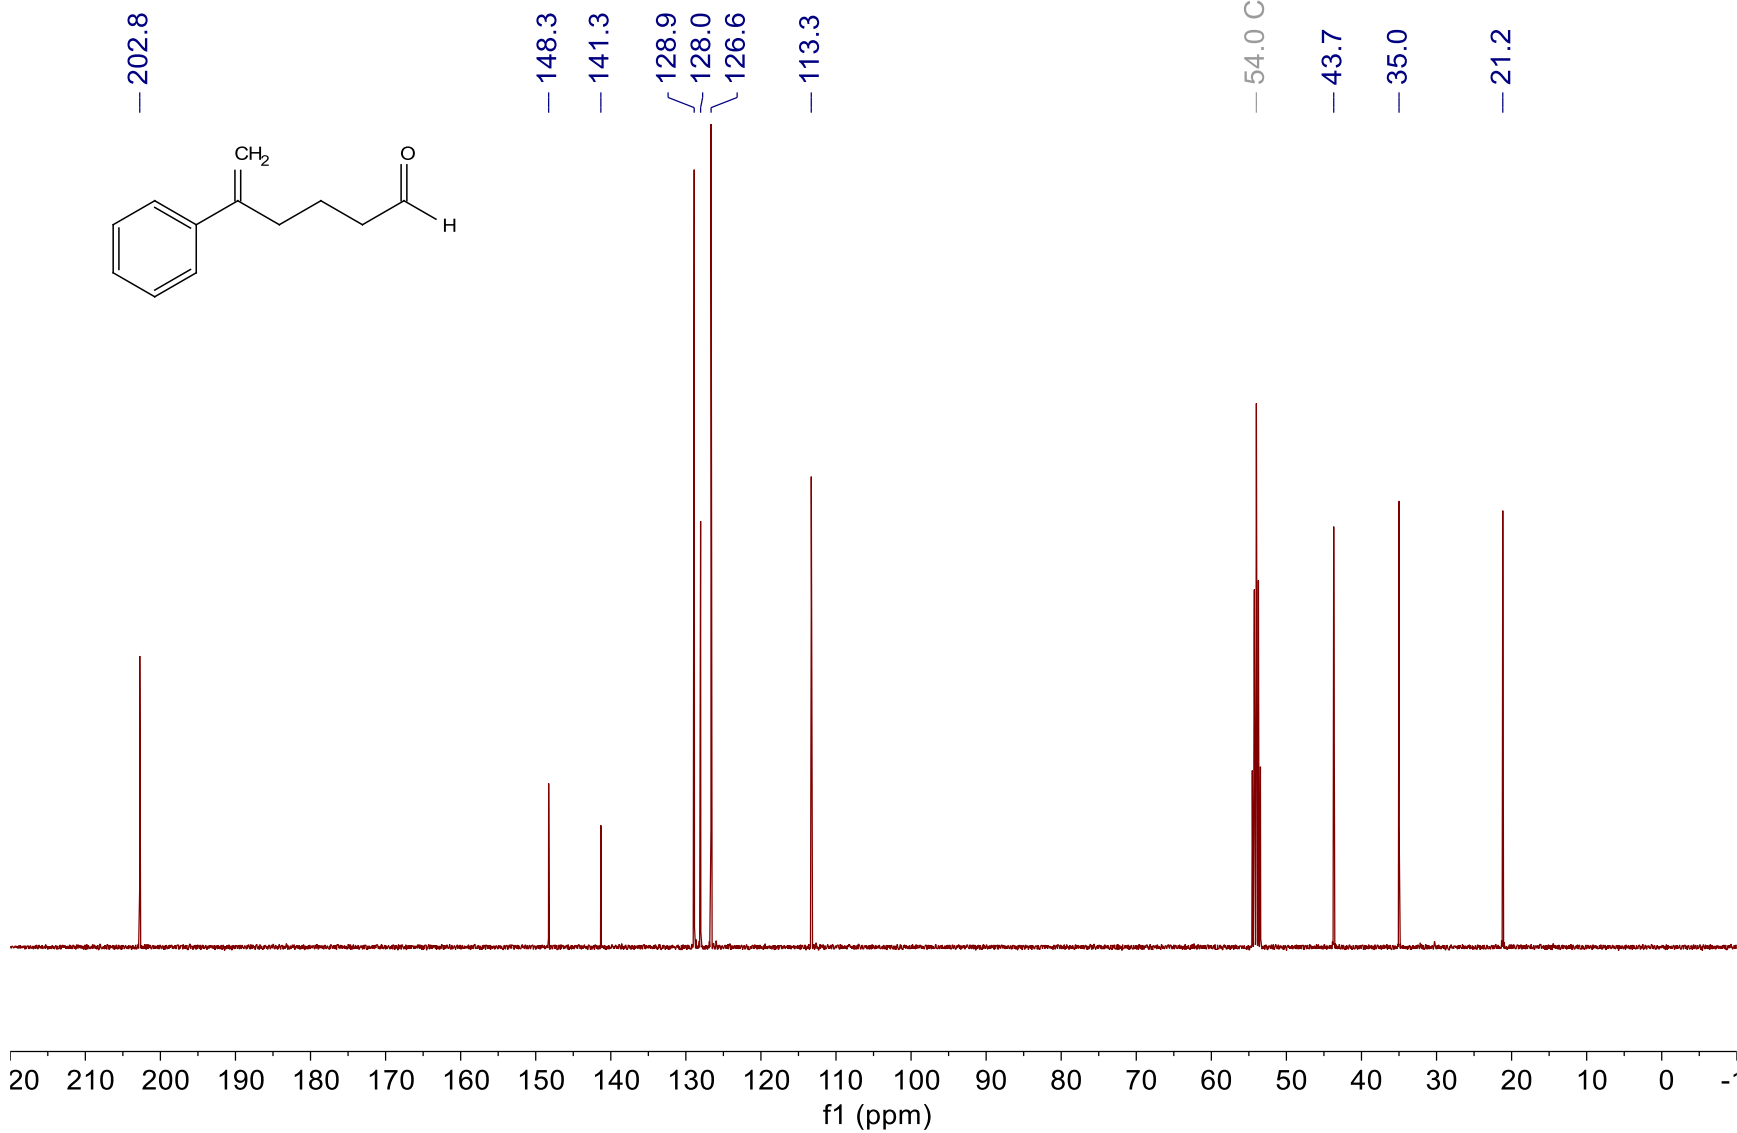

## 2l 5-phenylhex-5-enal

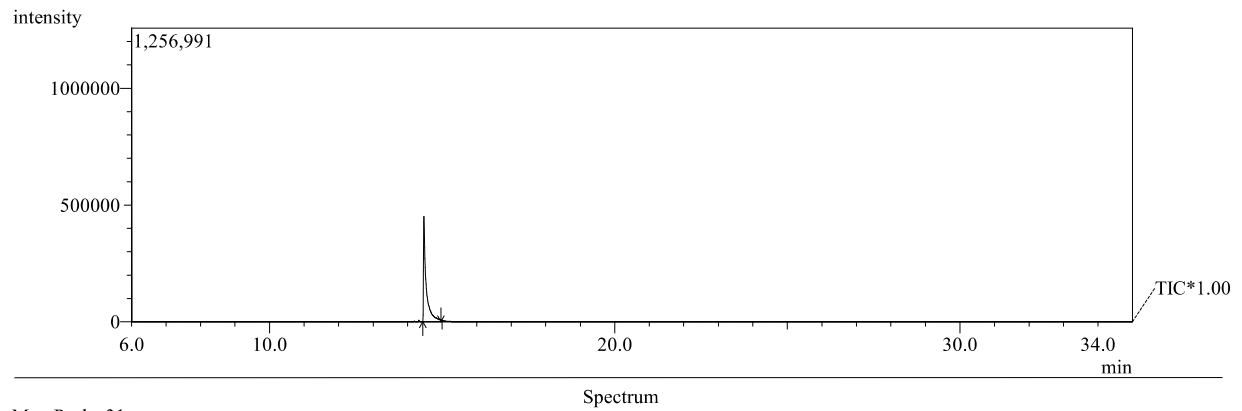

MassPeaks:31  
RawMode:Averaged 14.5-14.5(1017-1019) BasePeak:118(104711)  
BG Mode:Calc. from Peak  
intensity

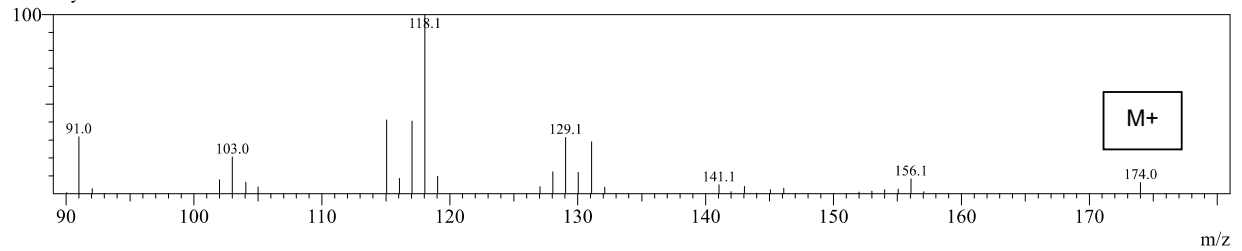

2m 5-(4-methoxyphenyl)hex-5-enal  
1H NMR at 400.15 MHz in CD2Cl2

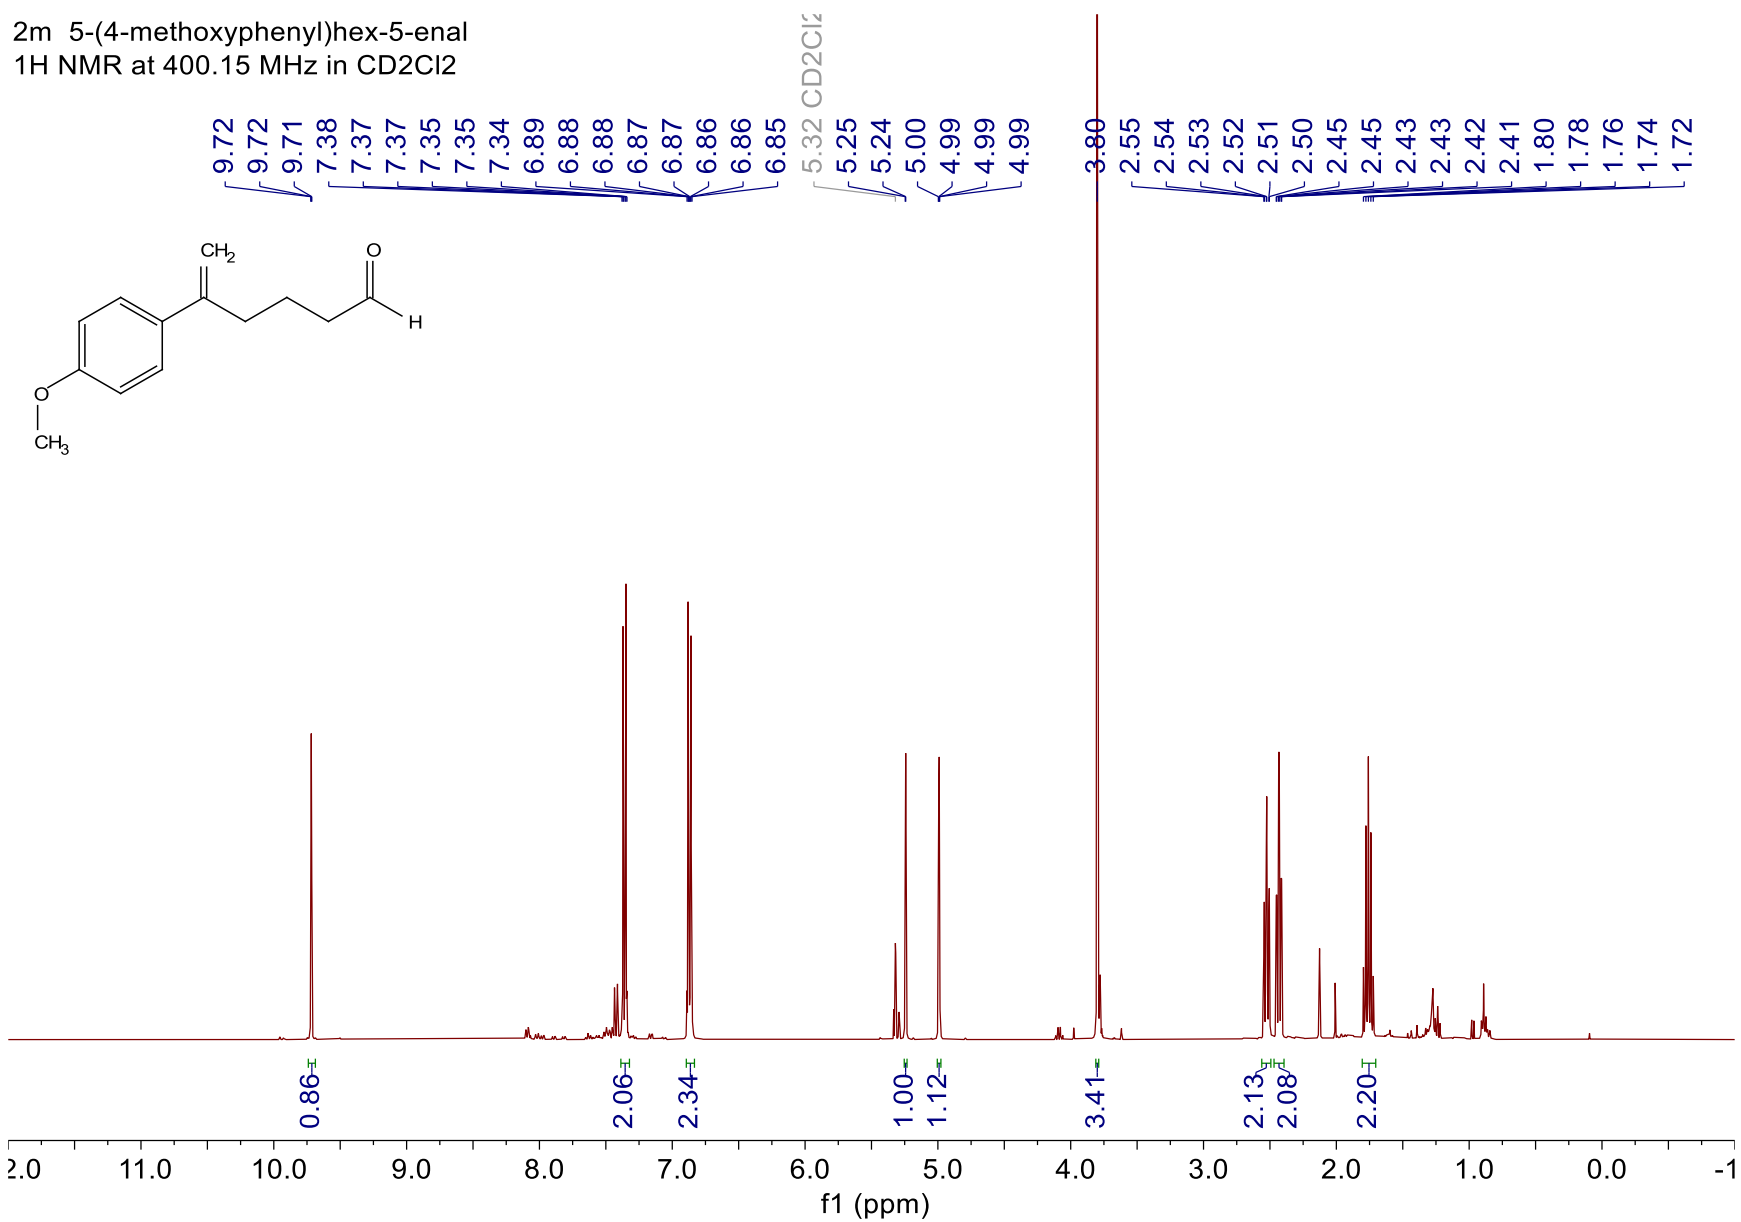

2m 5-(4-methoxyphenyl)hex-5-enal  
13C NMR at 100.63 MHz in CD2Cl2

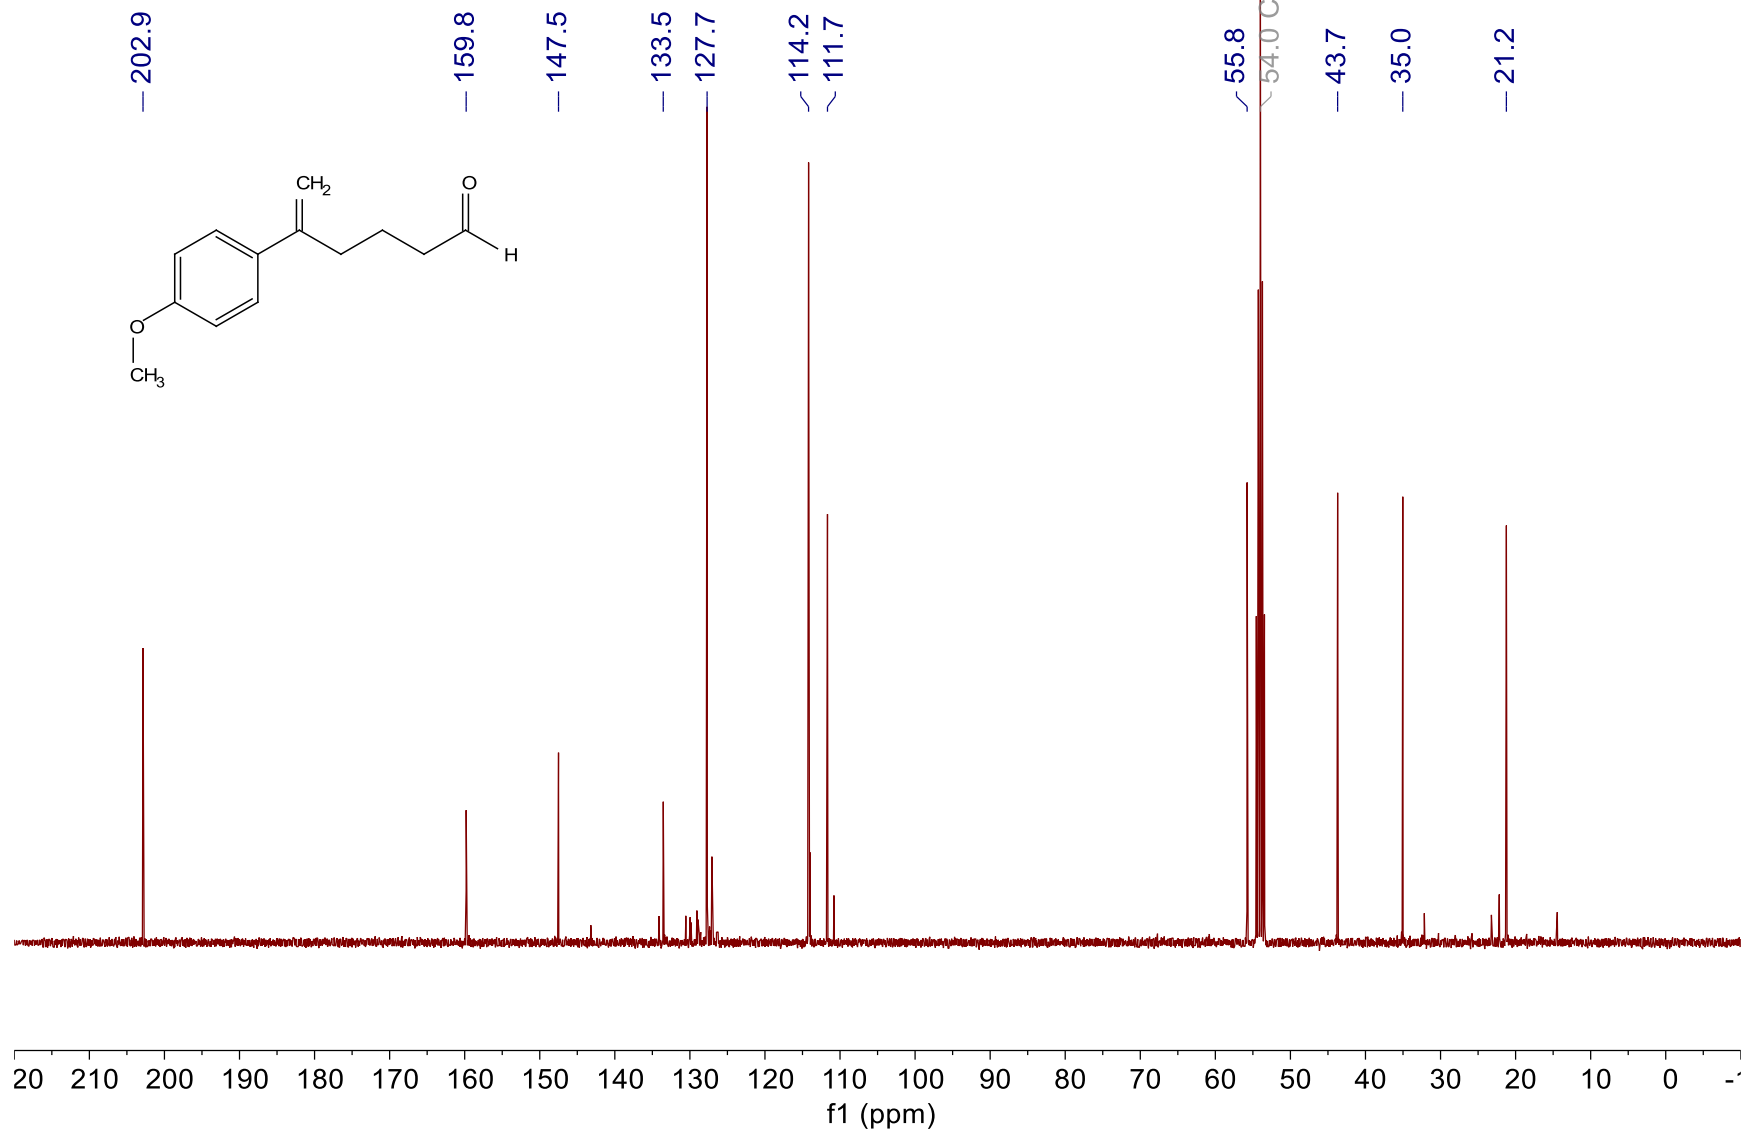

2n 5-(furan-2-yl)hex-5-enal  
1H NMR at 598.93 MHz in CD3CN

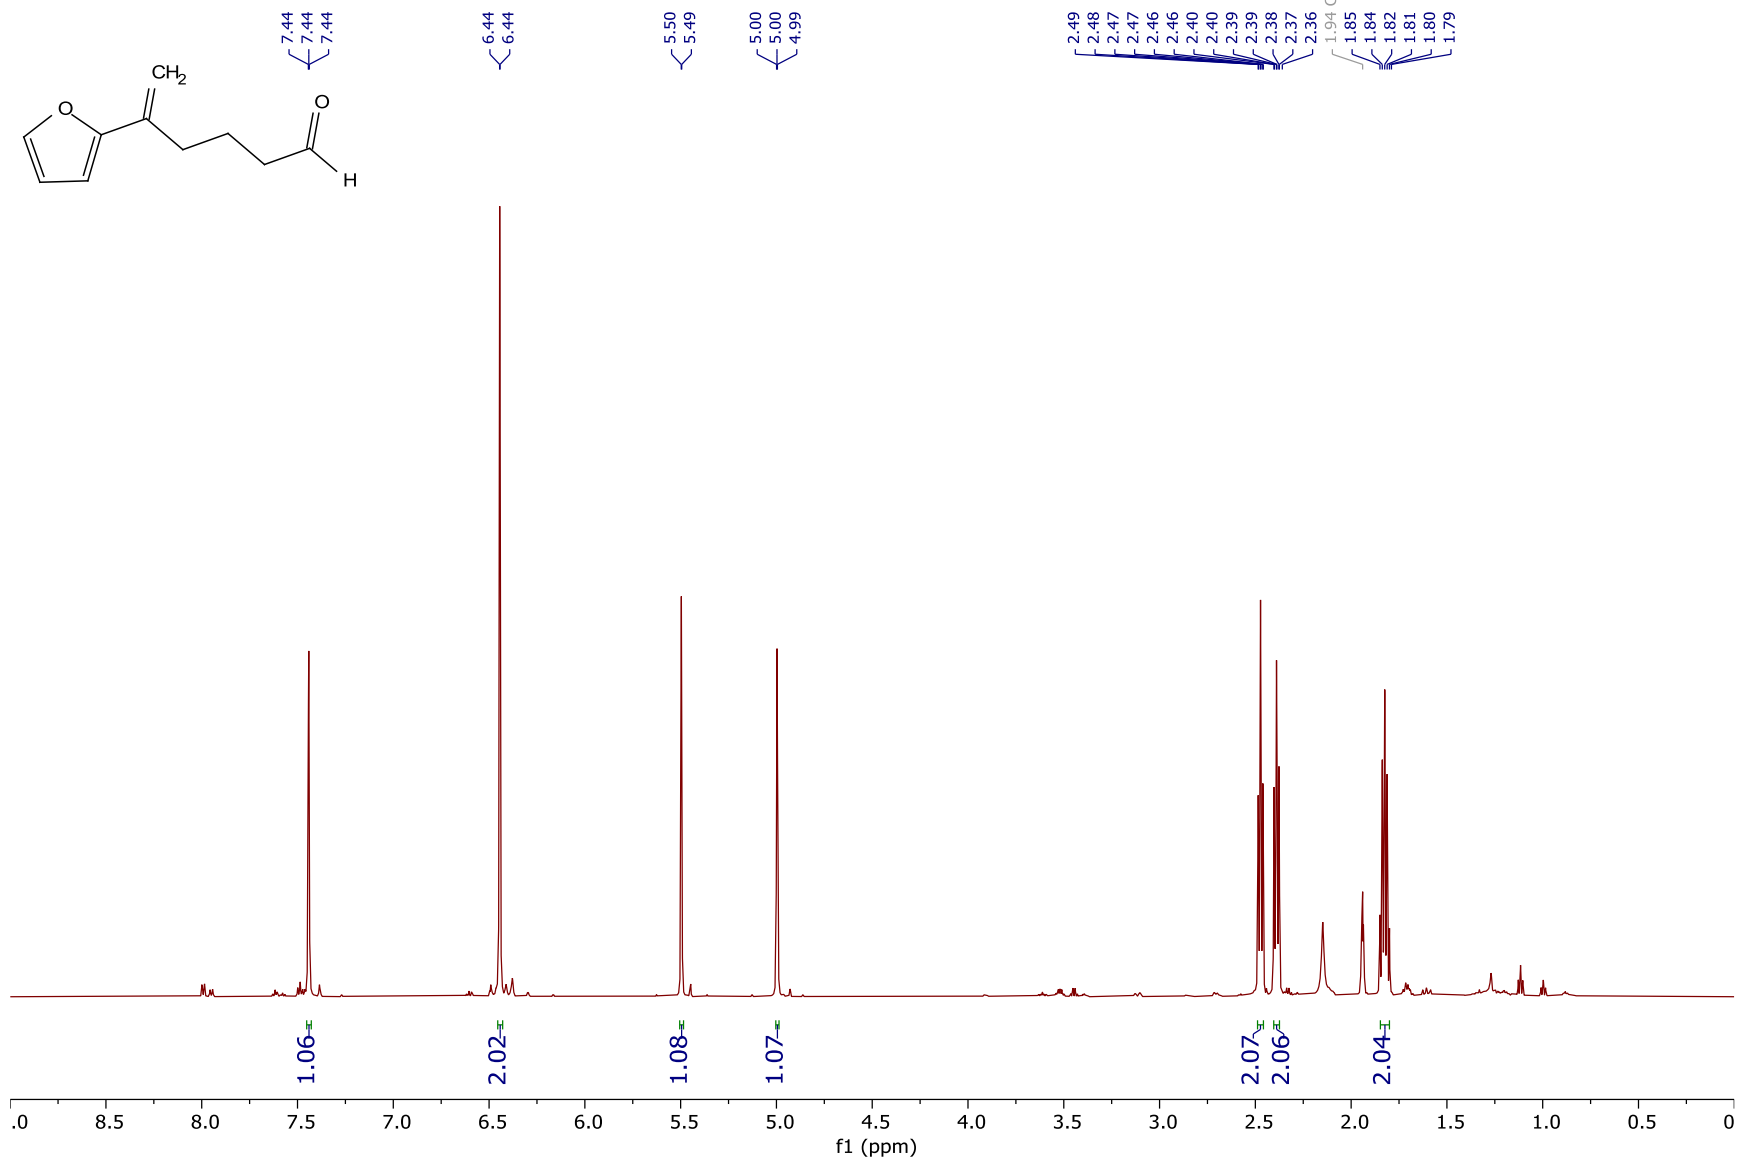

2n 5-(furan-2-yl)hex-5-enal  
13C NMR at 150.62 MHz in CD3CN

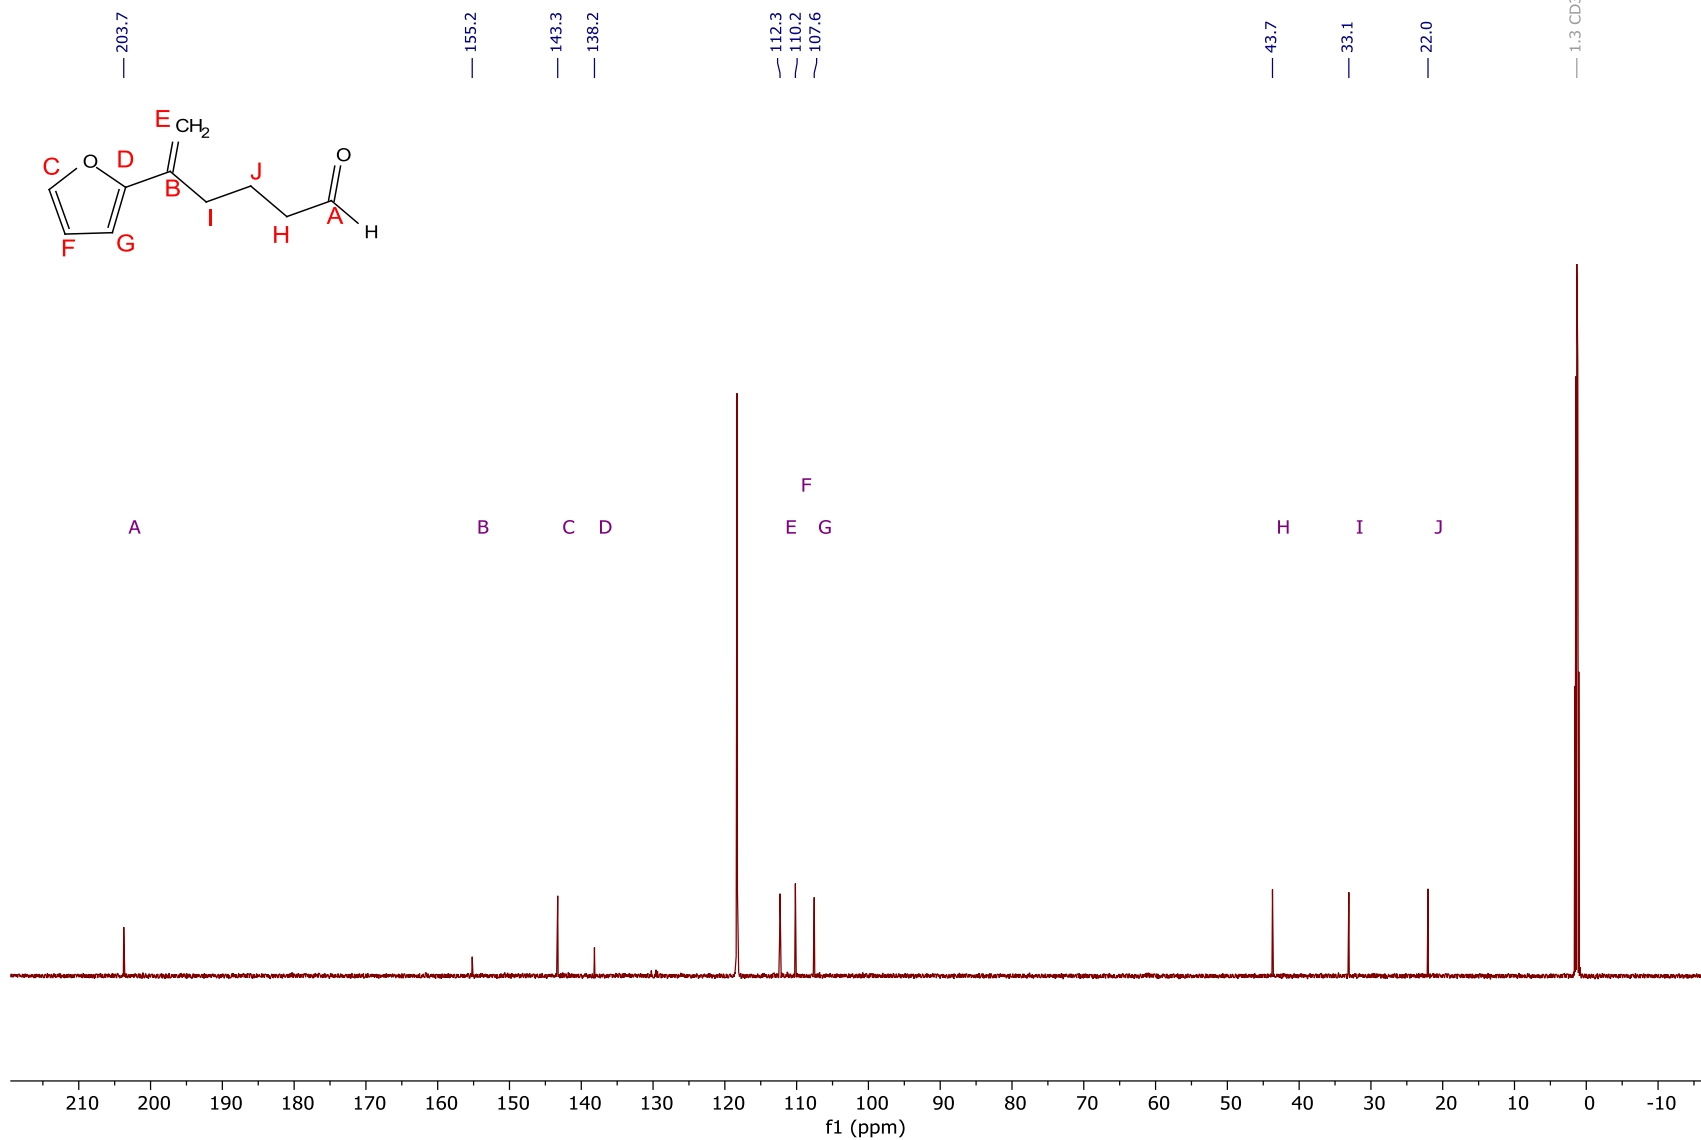

E101



2o [5-(pyridin-2-yl)hex-5-enal]  
1H NMR at 800.34 MHz in CDCl3

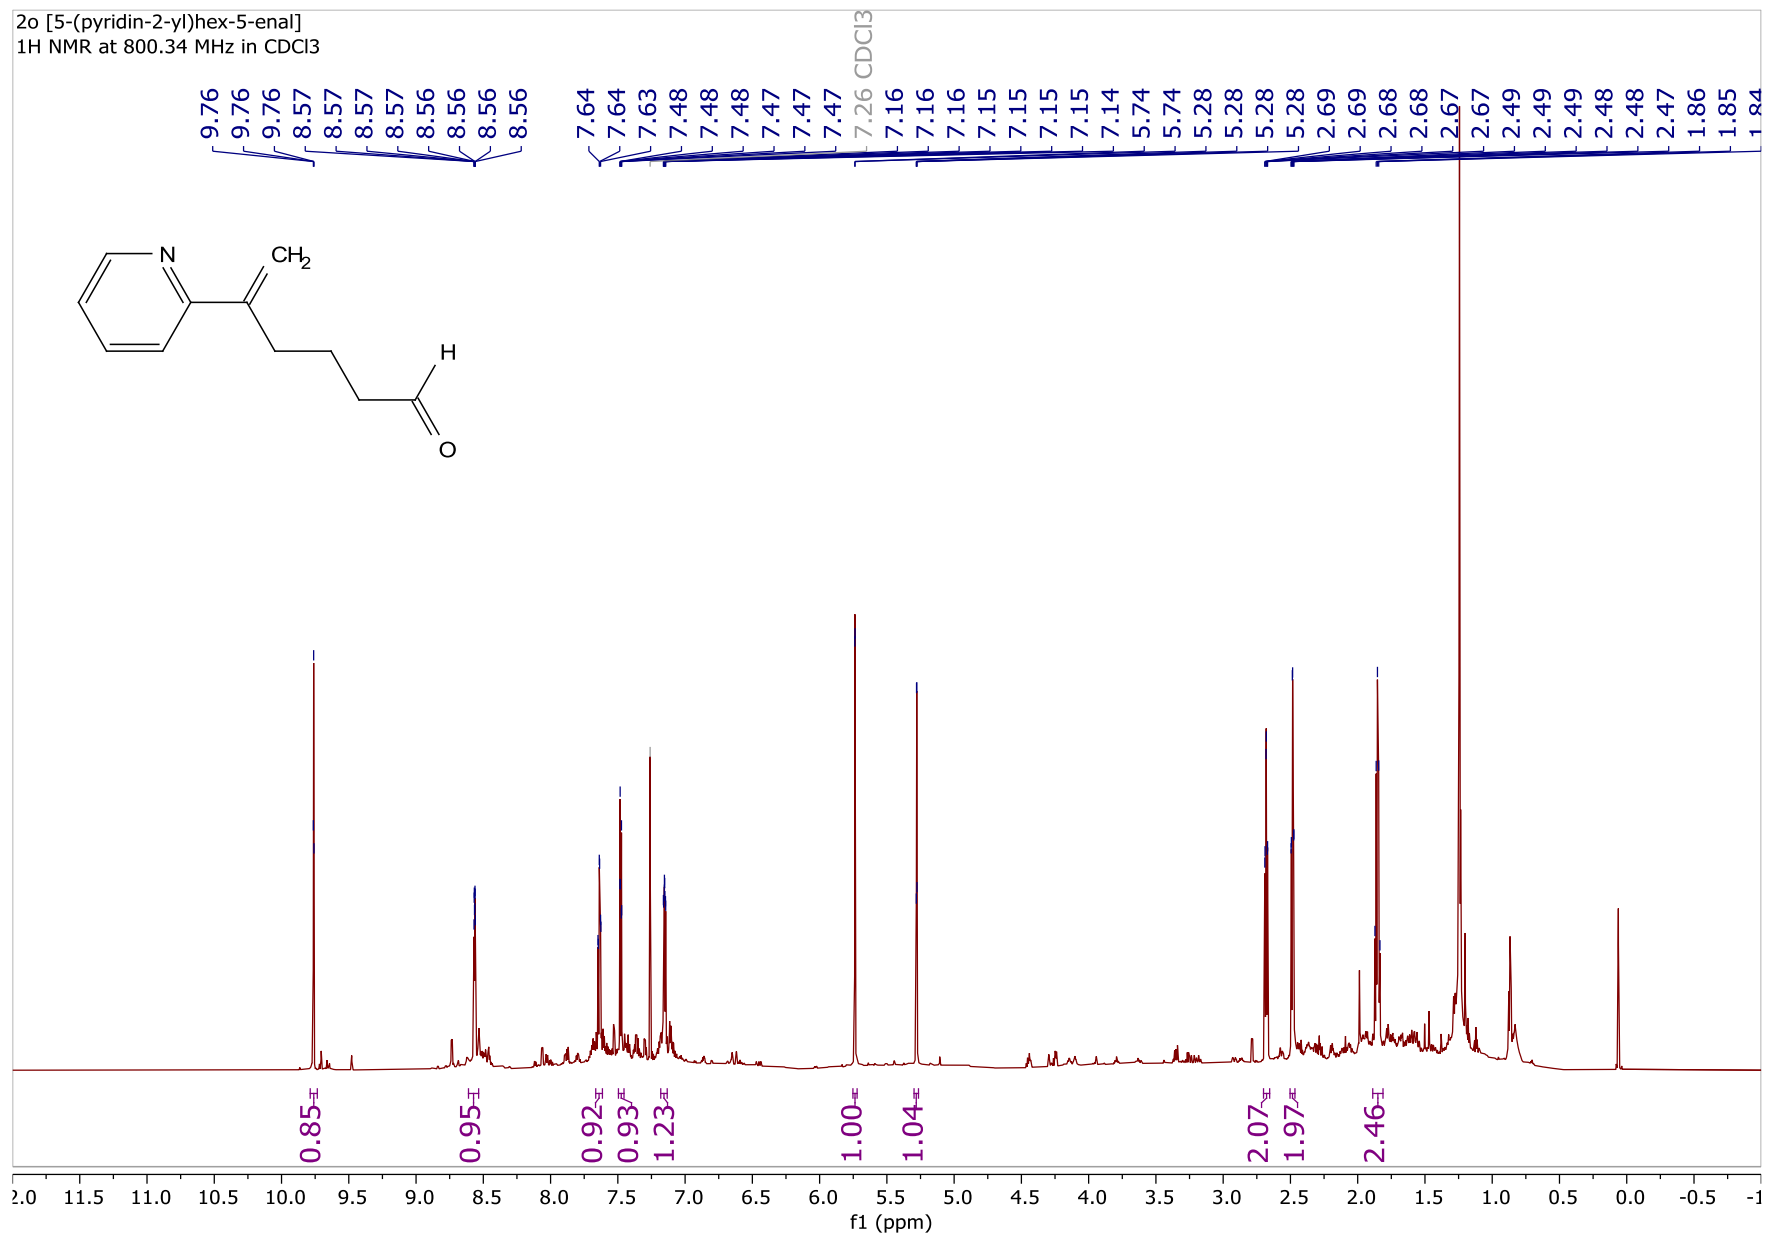

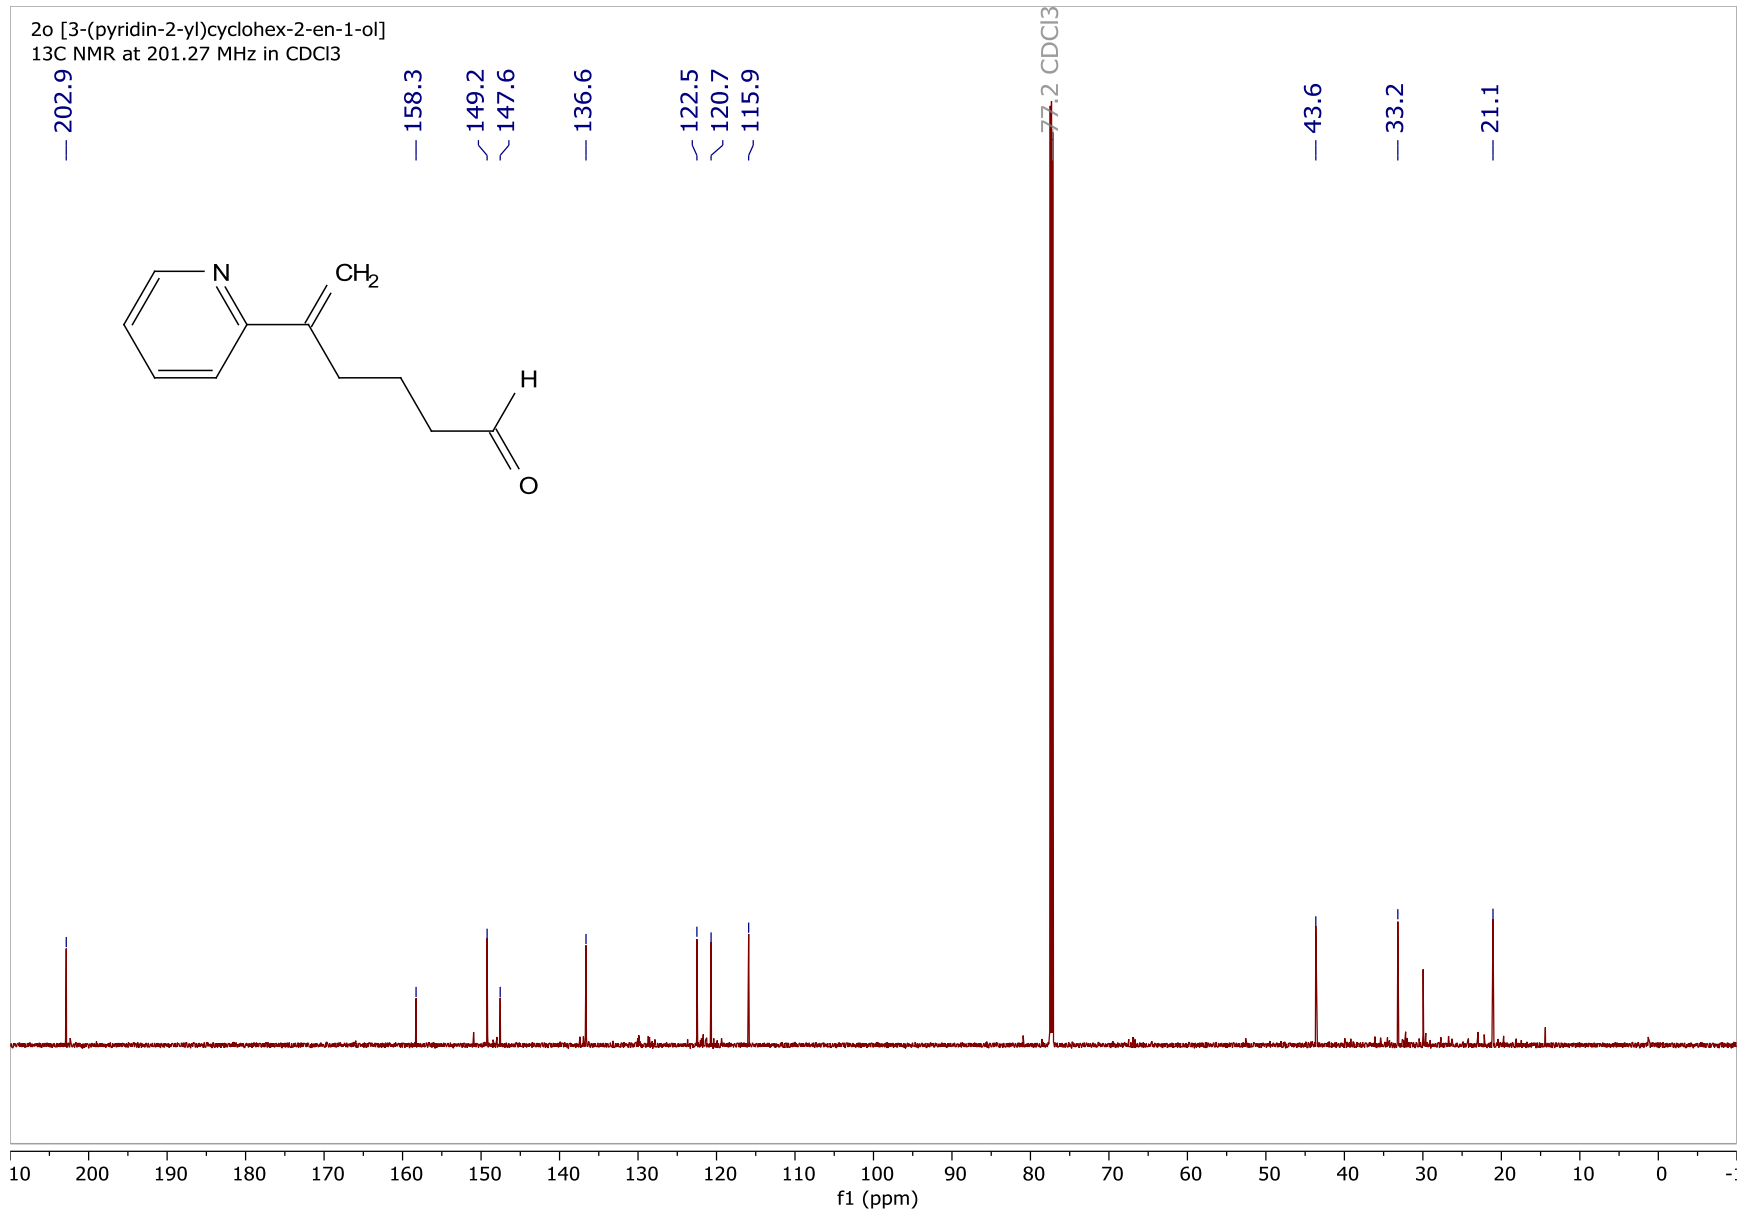

3 3-phenylcyclohept-2-en-1-ol  
1H NMR at 400.15 MHz in CD2Cl2

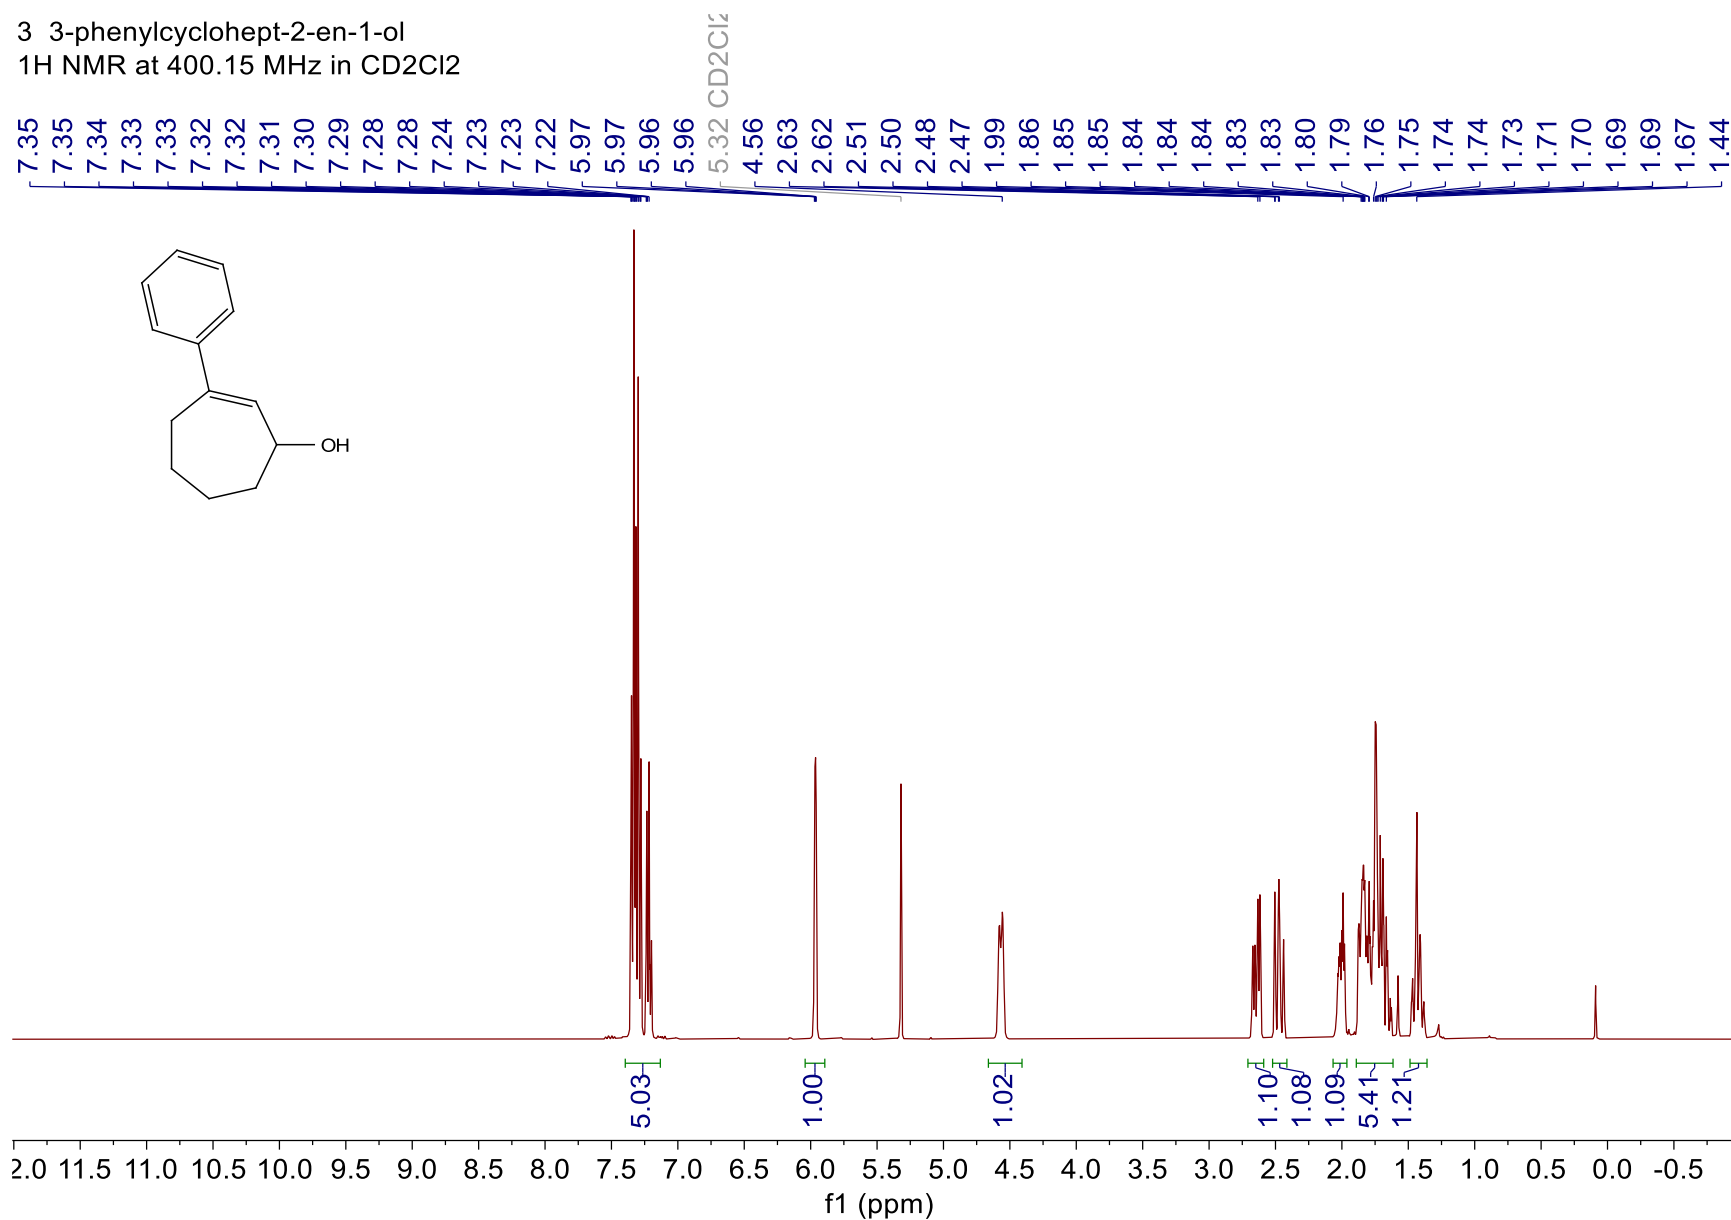

3 3-phenylcyclohept-2-en-1-ol  
13C NMR at 100.63 MHz in CD2Cl2

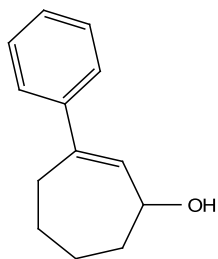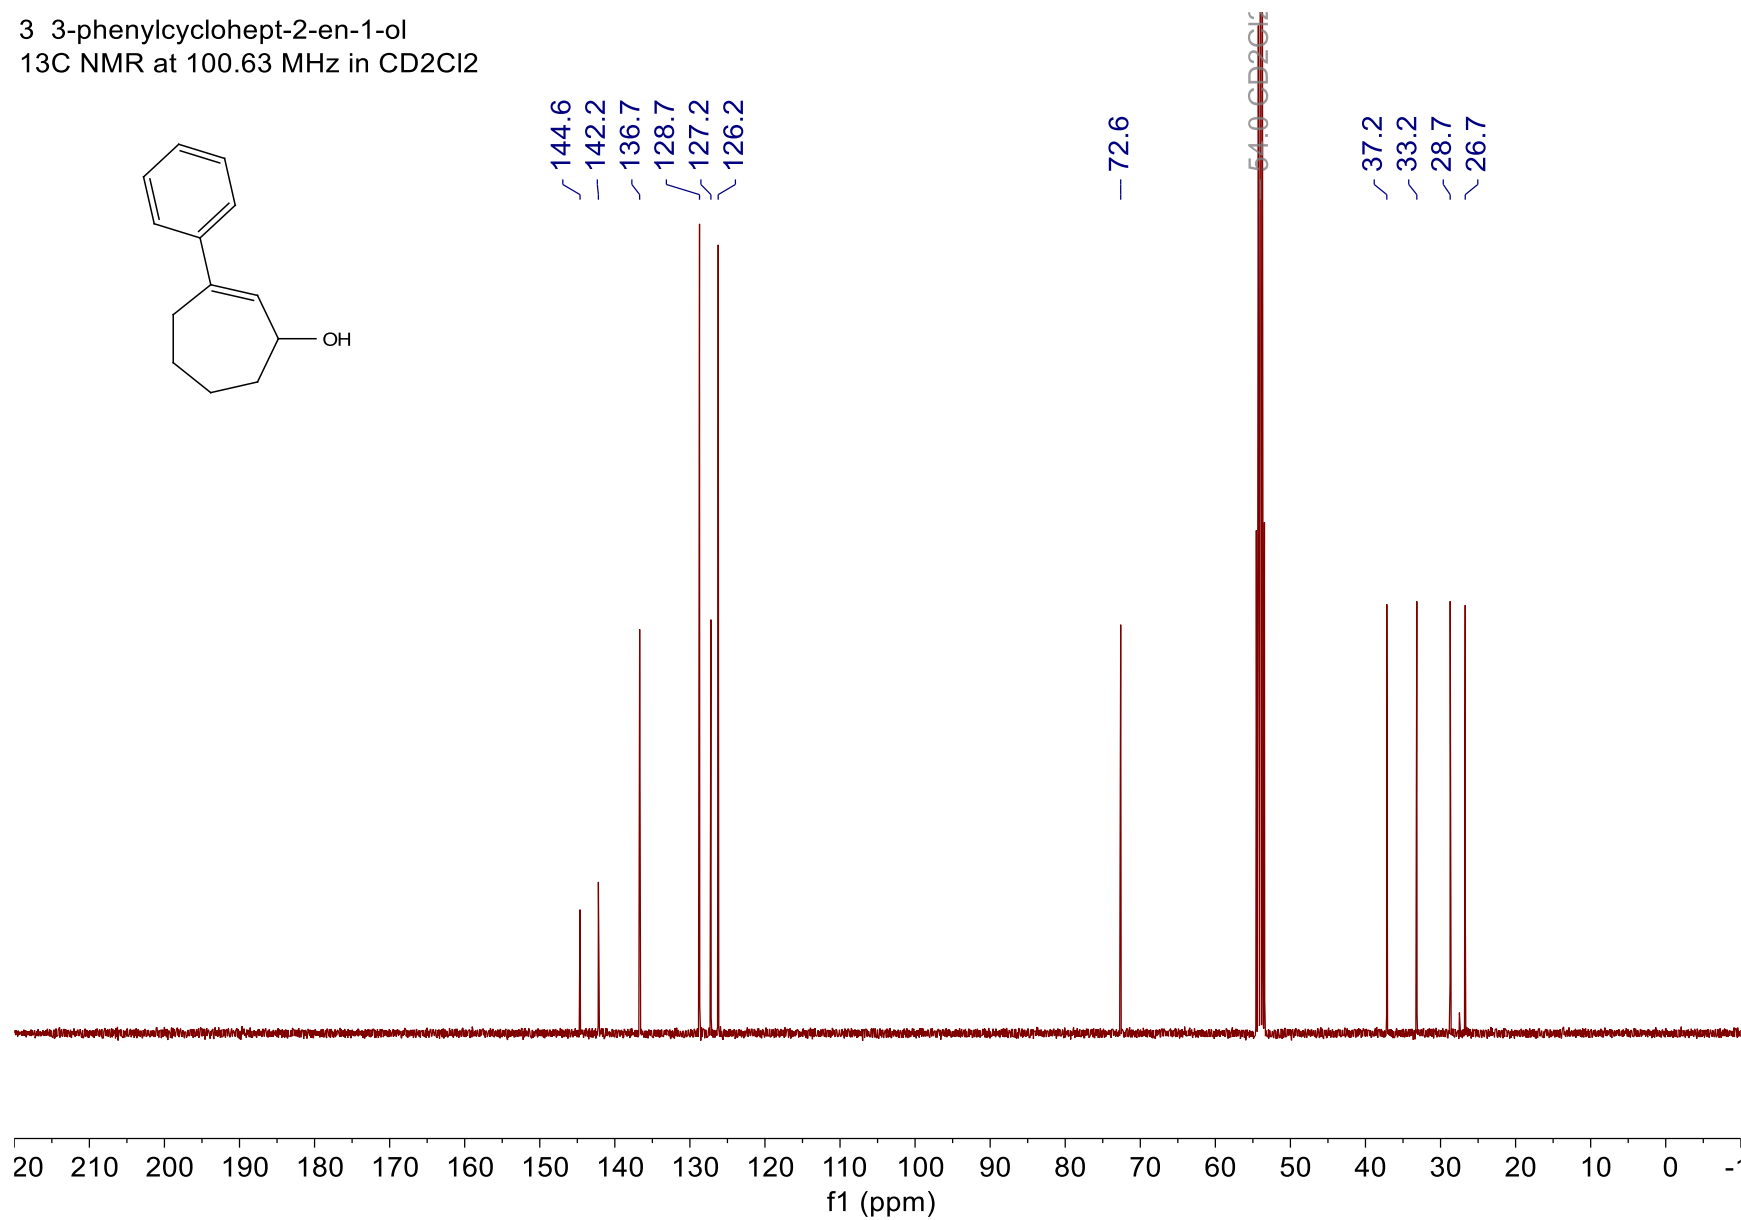

### 3 3-phenylcyclohept-2-en-1-ol

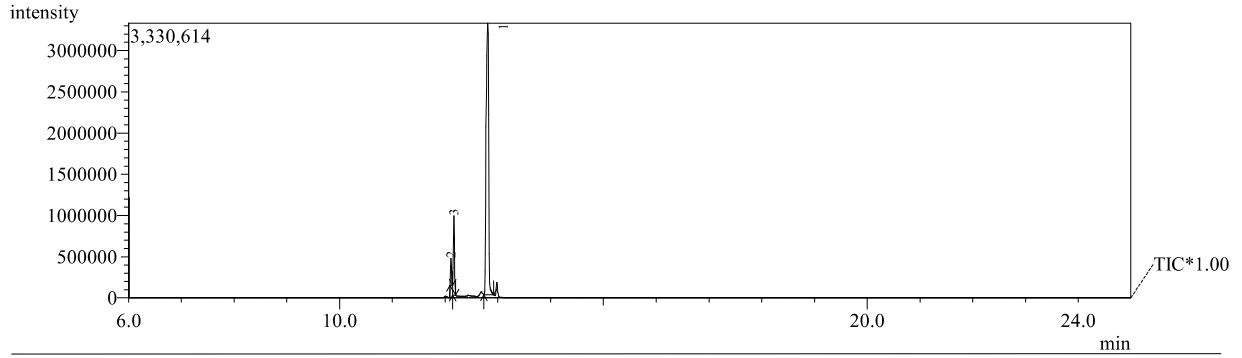

Line#:1 R.Time:12.8(Scan#:818)  
MassPeaks:65  
RawMode:Averaged 12.8-12.8(817-819) BasePeak:131(257264)  
BG Mode:Calc. from Peak

M+

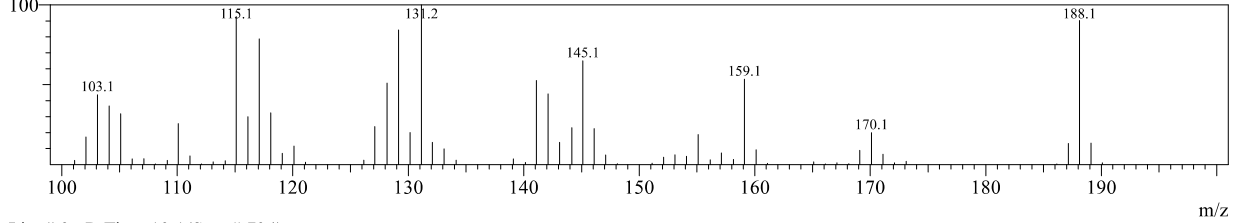

Line#:2 R.Time:12.1(Scan#:734)  
MassPeaks:33  
RawMode:Averaged 12.1-12.1(733-735) BasePeak:142(34518)  
BG Mode:Calc. from Peak

M+  
(-H<sub>2</sub>O)

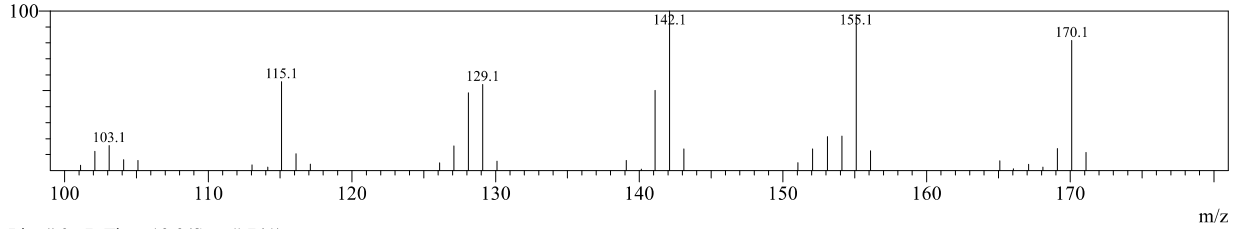

Line#:3 R.Time:12.2(Scan#:741)  
MassPeaks:38  
RawMode:Averaged 12.2-12.2(740-742) BasePeak:142(97041)  
BG Mode:Calc. from Peak

M+  
(-H<sub>2</sub>O)

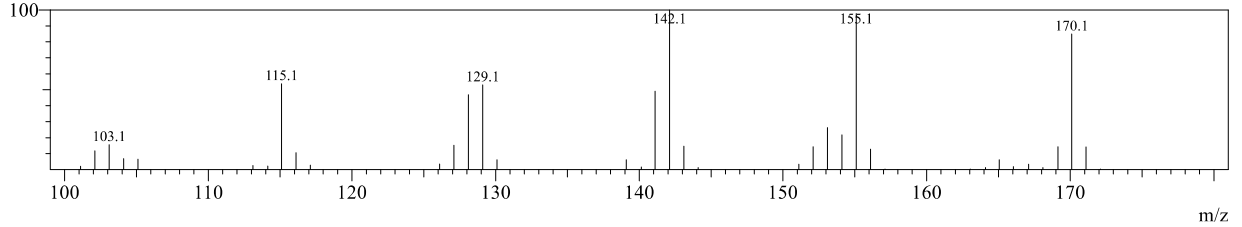

4 6-phenylhept-6-enal  
1H NMR at 400.15 MHz in CDCl3

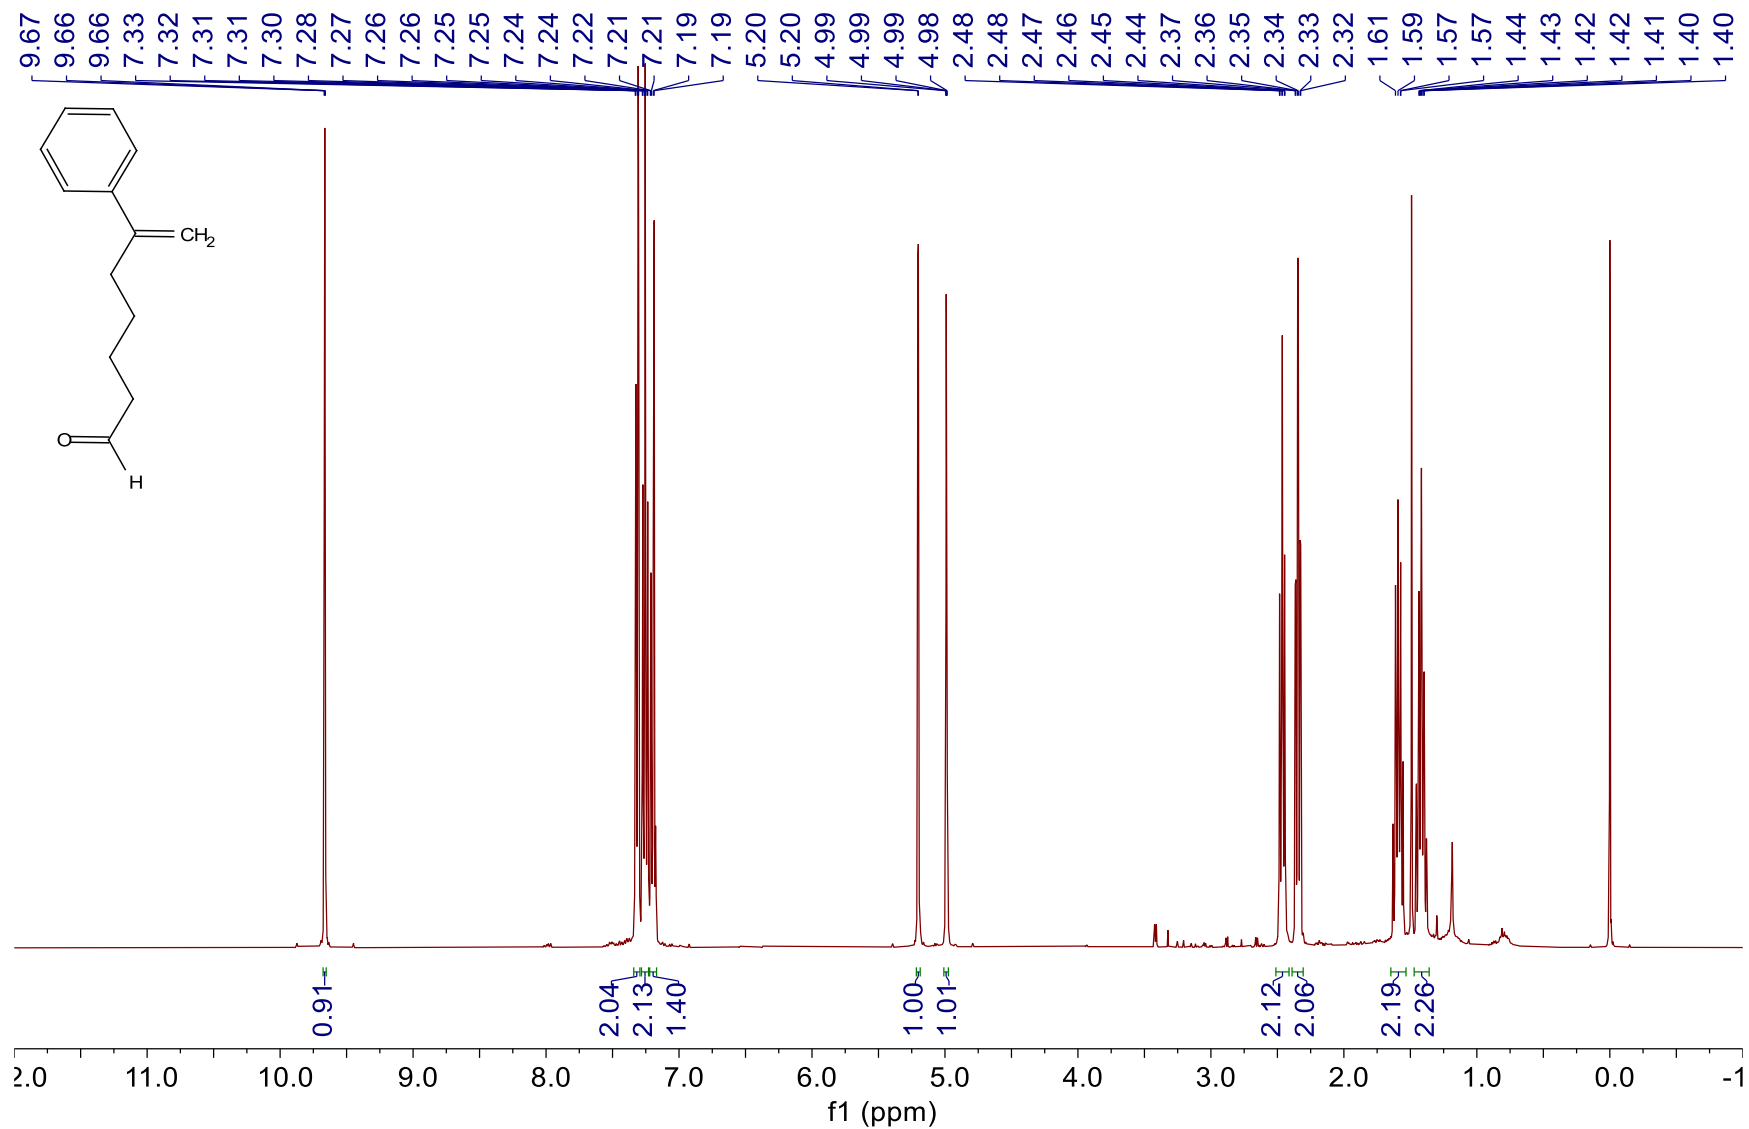

4 6-phenylhept-6-enal  
13C NMR at 100.63 MHz in CDCl3

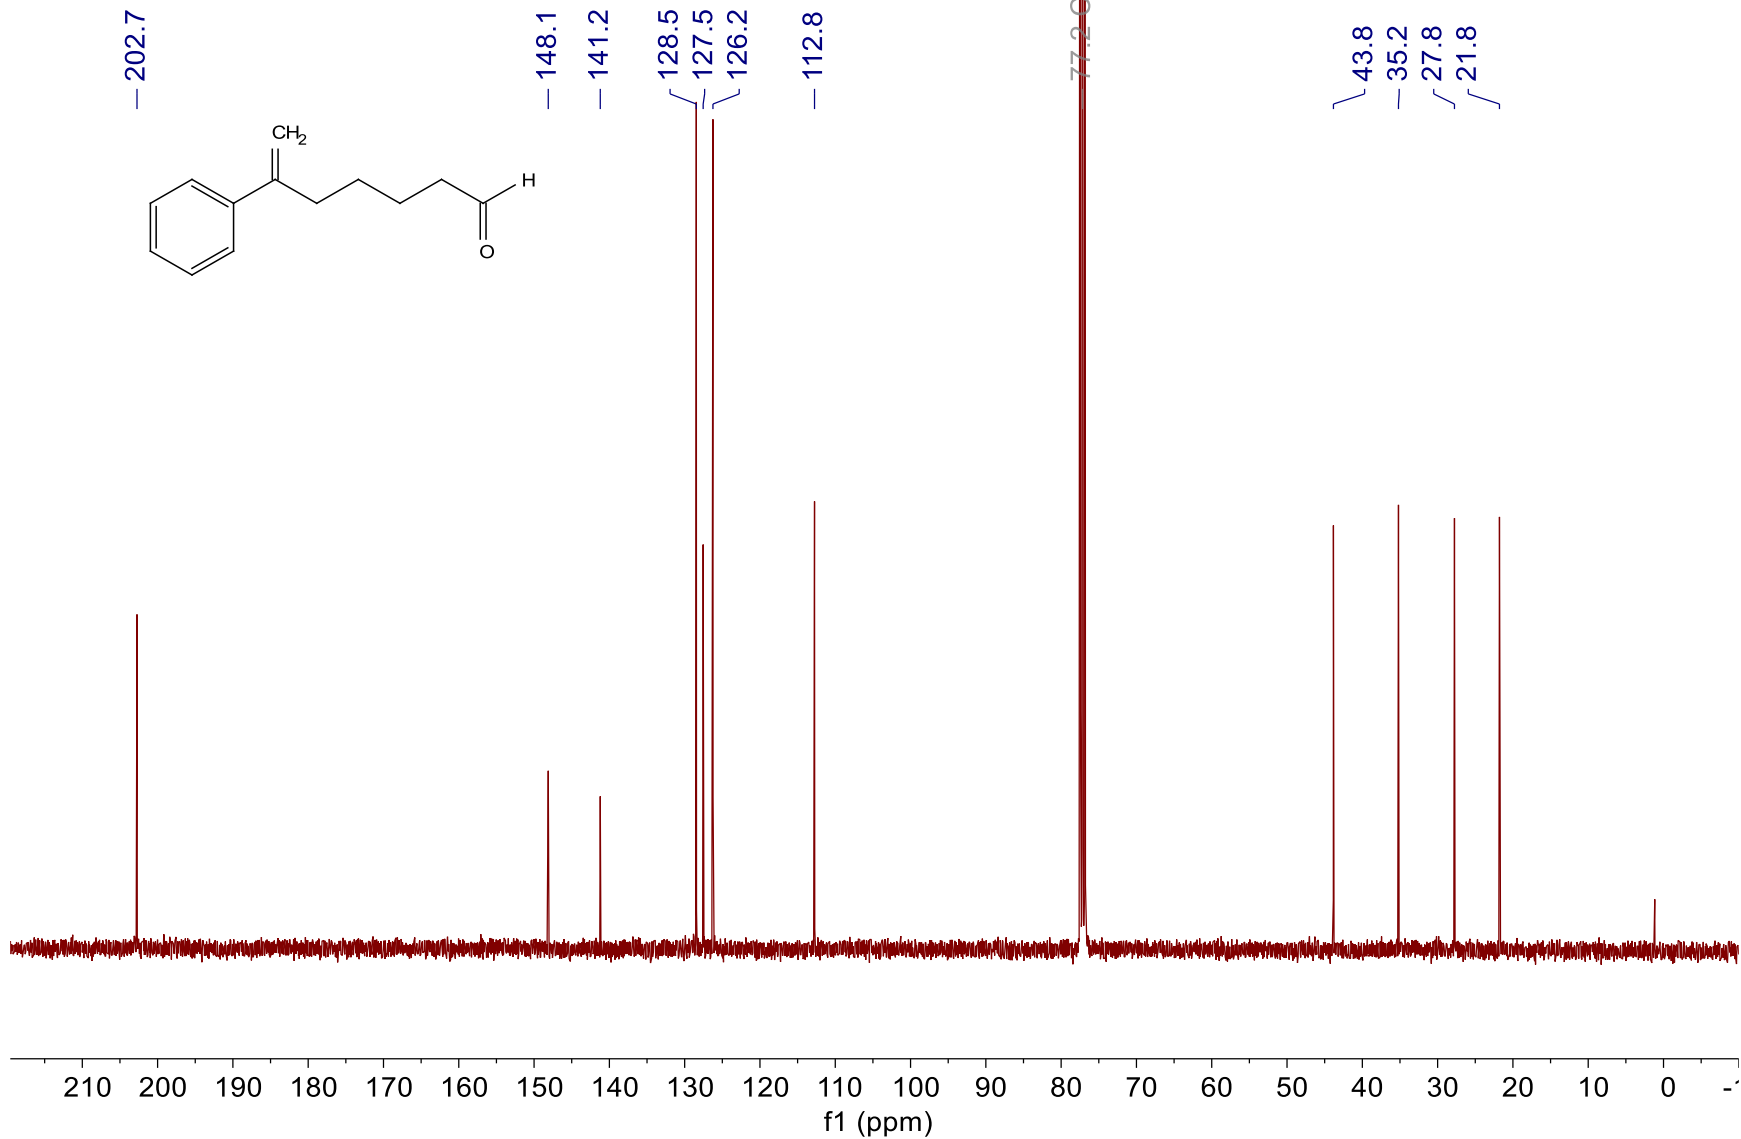

## 4 6-phenylhept-6-enal

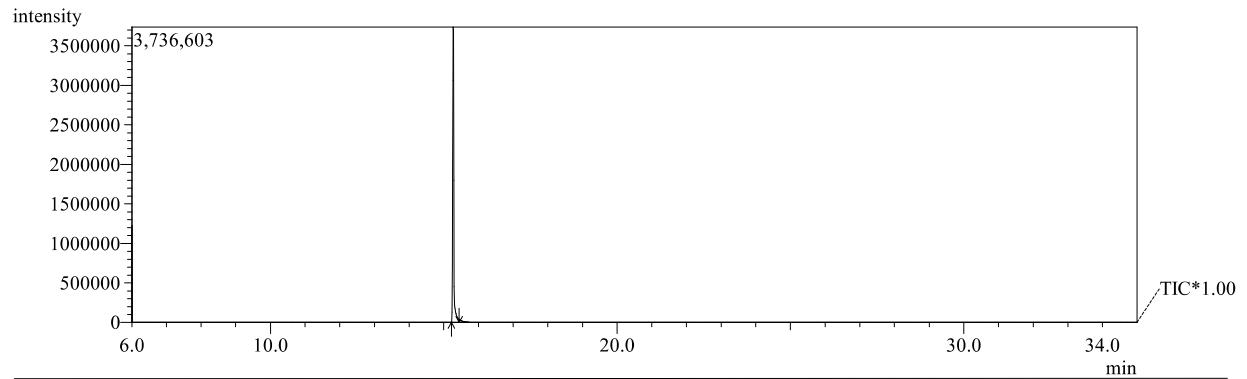

Spectrum

MassPeaks:51  
RawMode:Averaged 15.3-15.3(1113-1115) BasePeak:118(525639)  
BG Mode:Calc. from Peak

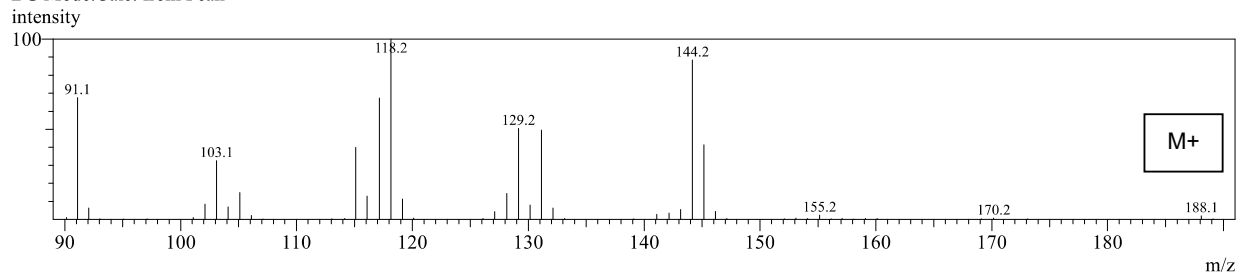



5 3-phenylcyclopent-2-en-1-ol  
1H NMR at 400.15 MHz in CD3CN

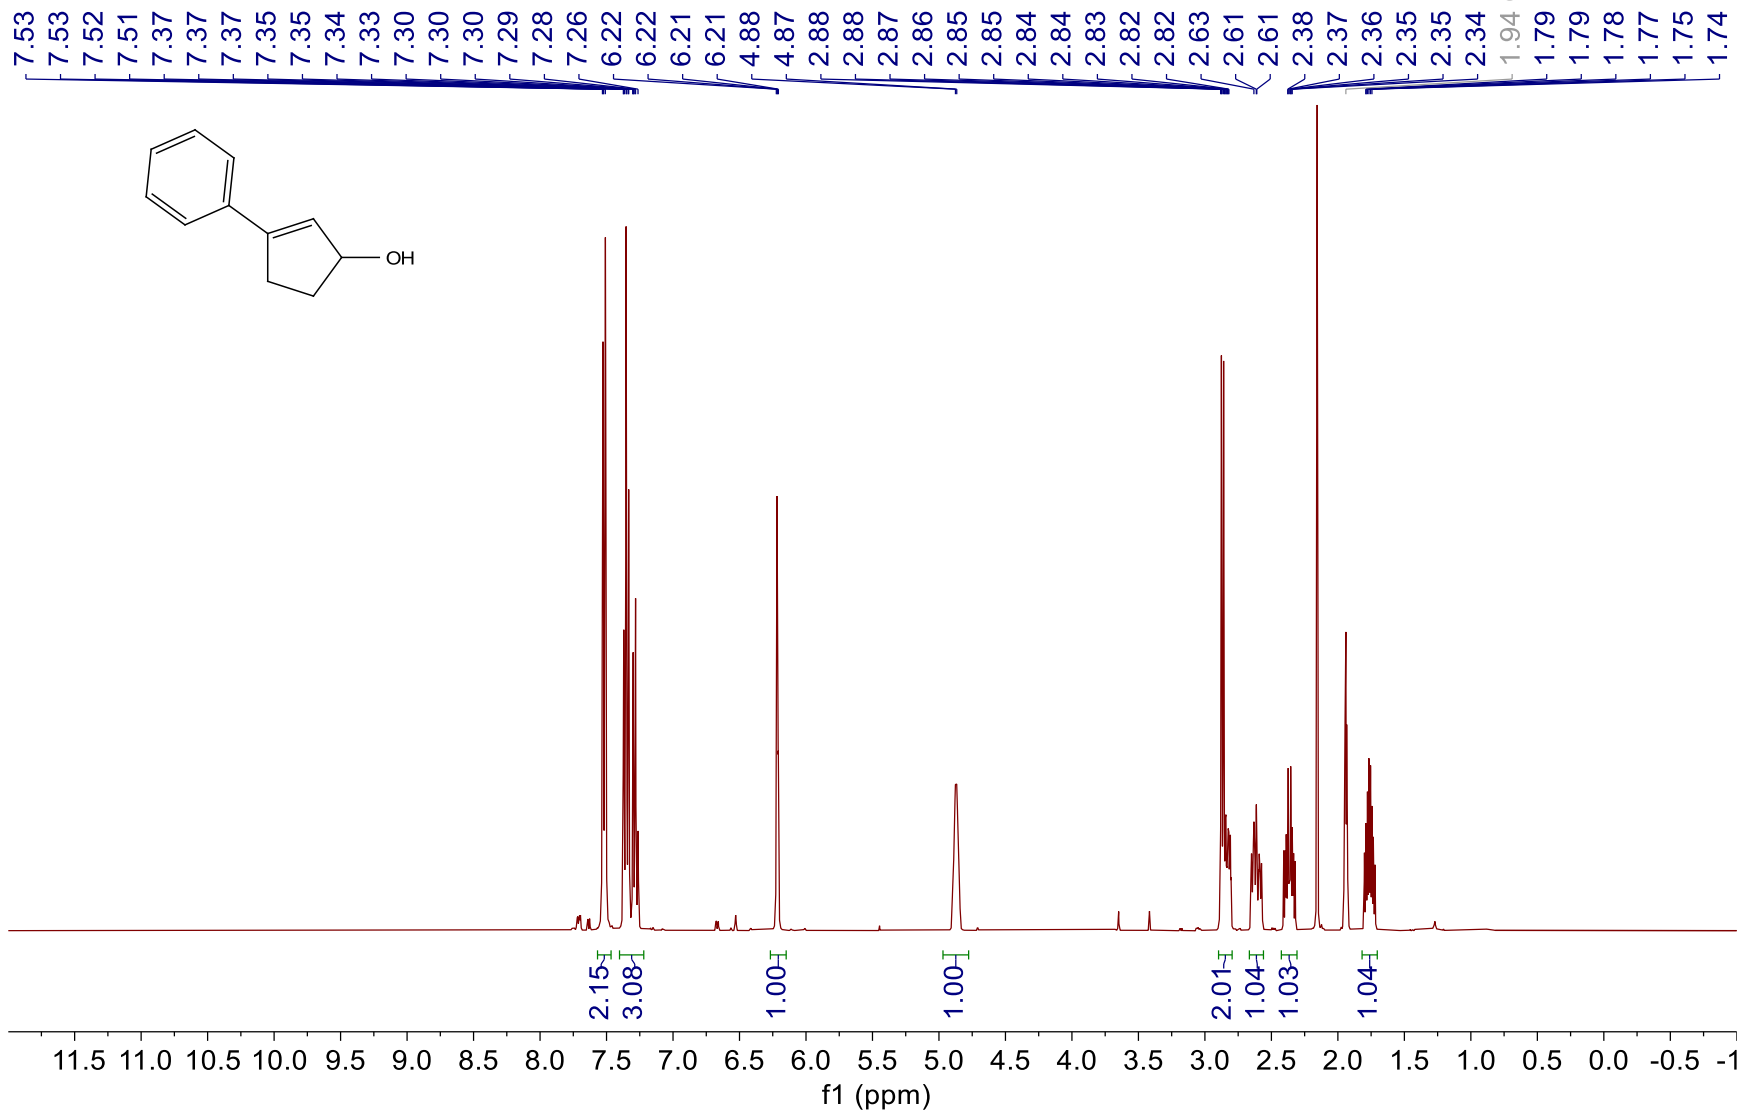

5 3-phenylcyclopent-2-en-1-ol  
13C NMR at 100.63 MHz in CD3CN

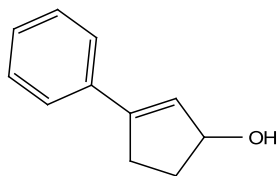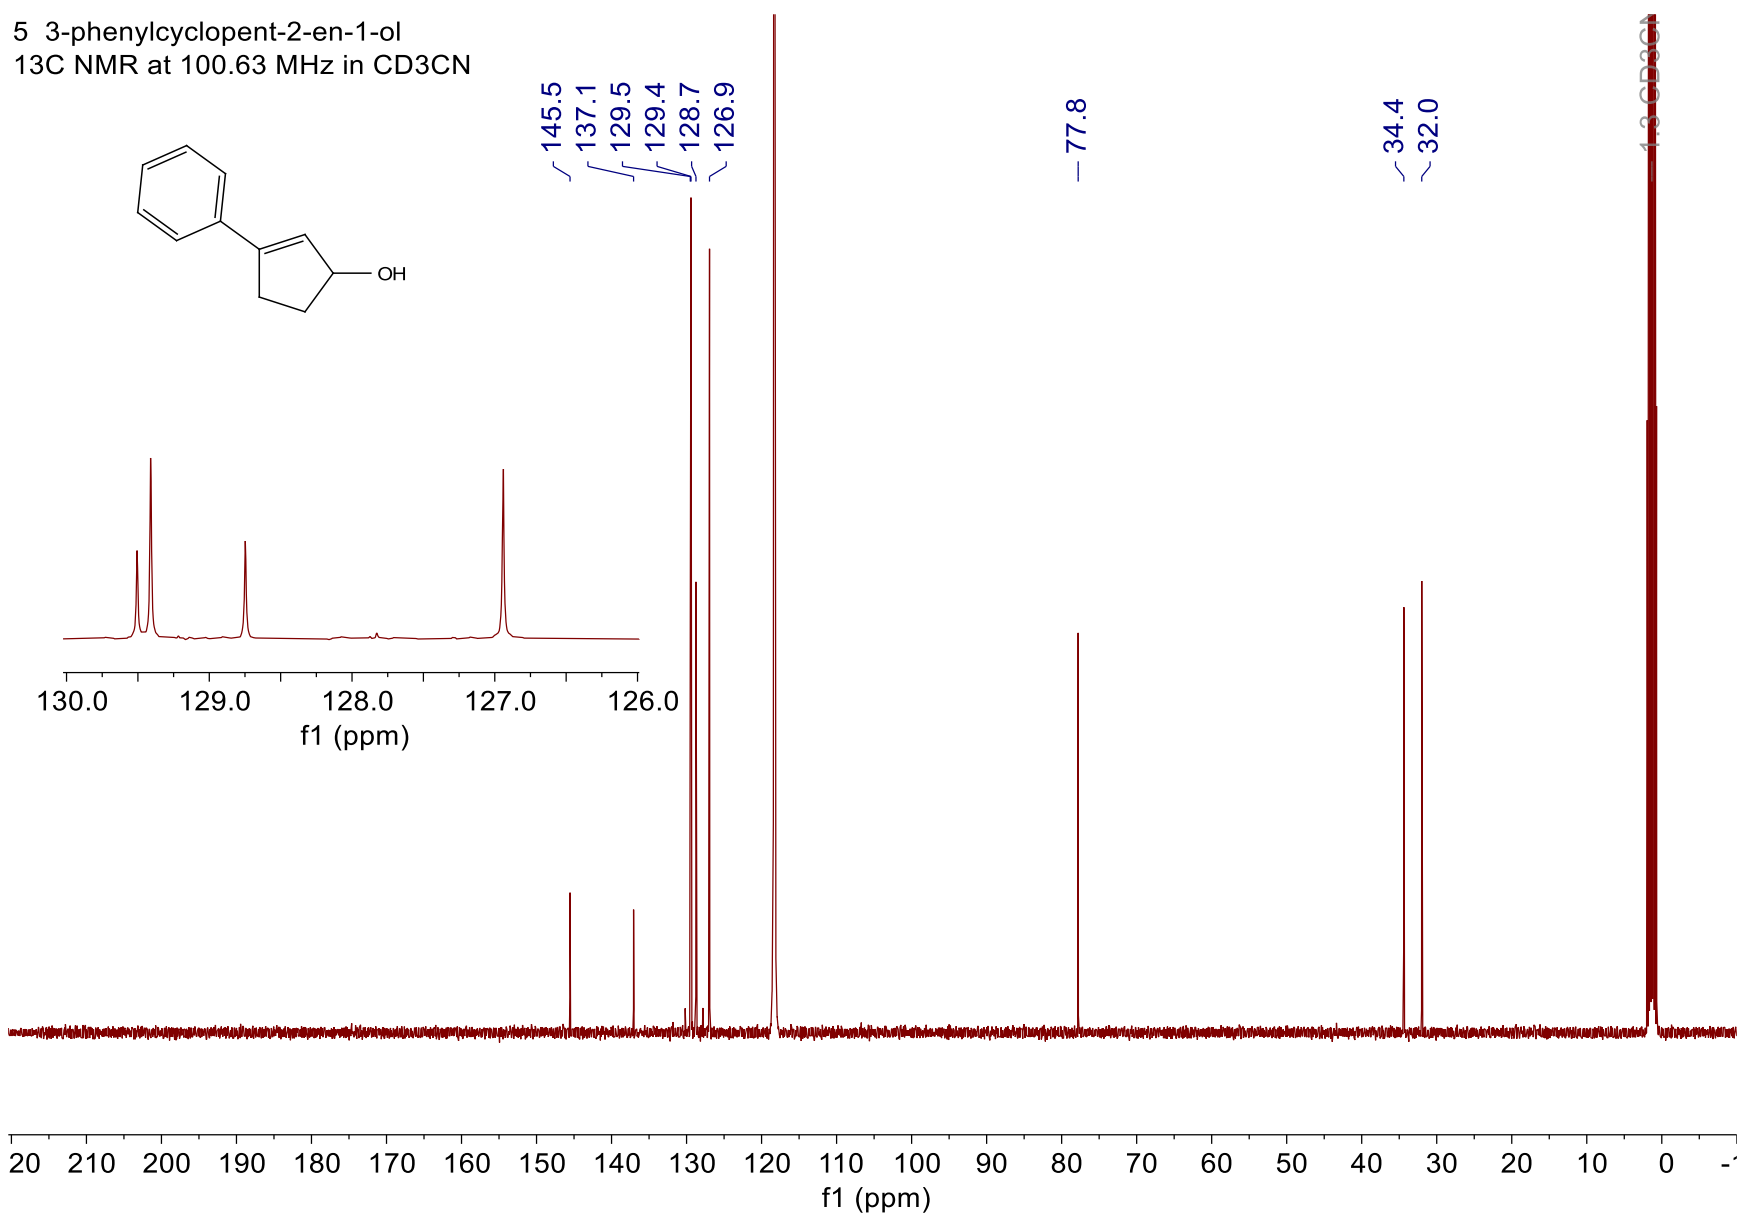

7 1',2',5',6'-tetrahydro-[1,1':3,1''-terphenyl]-5'-ol  
1H NMR at 400.15 MHz in CD3CN

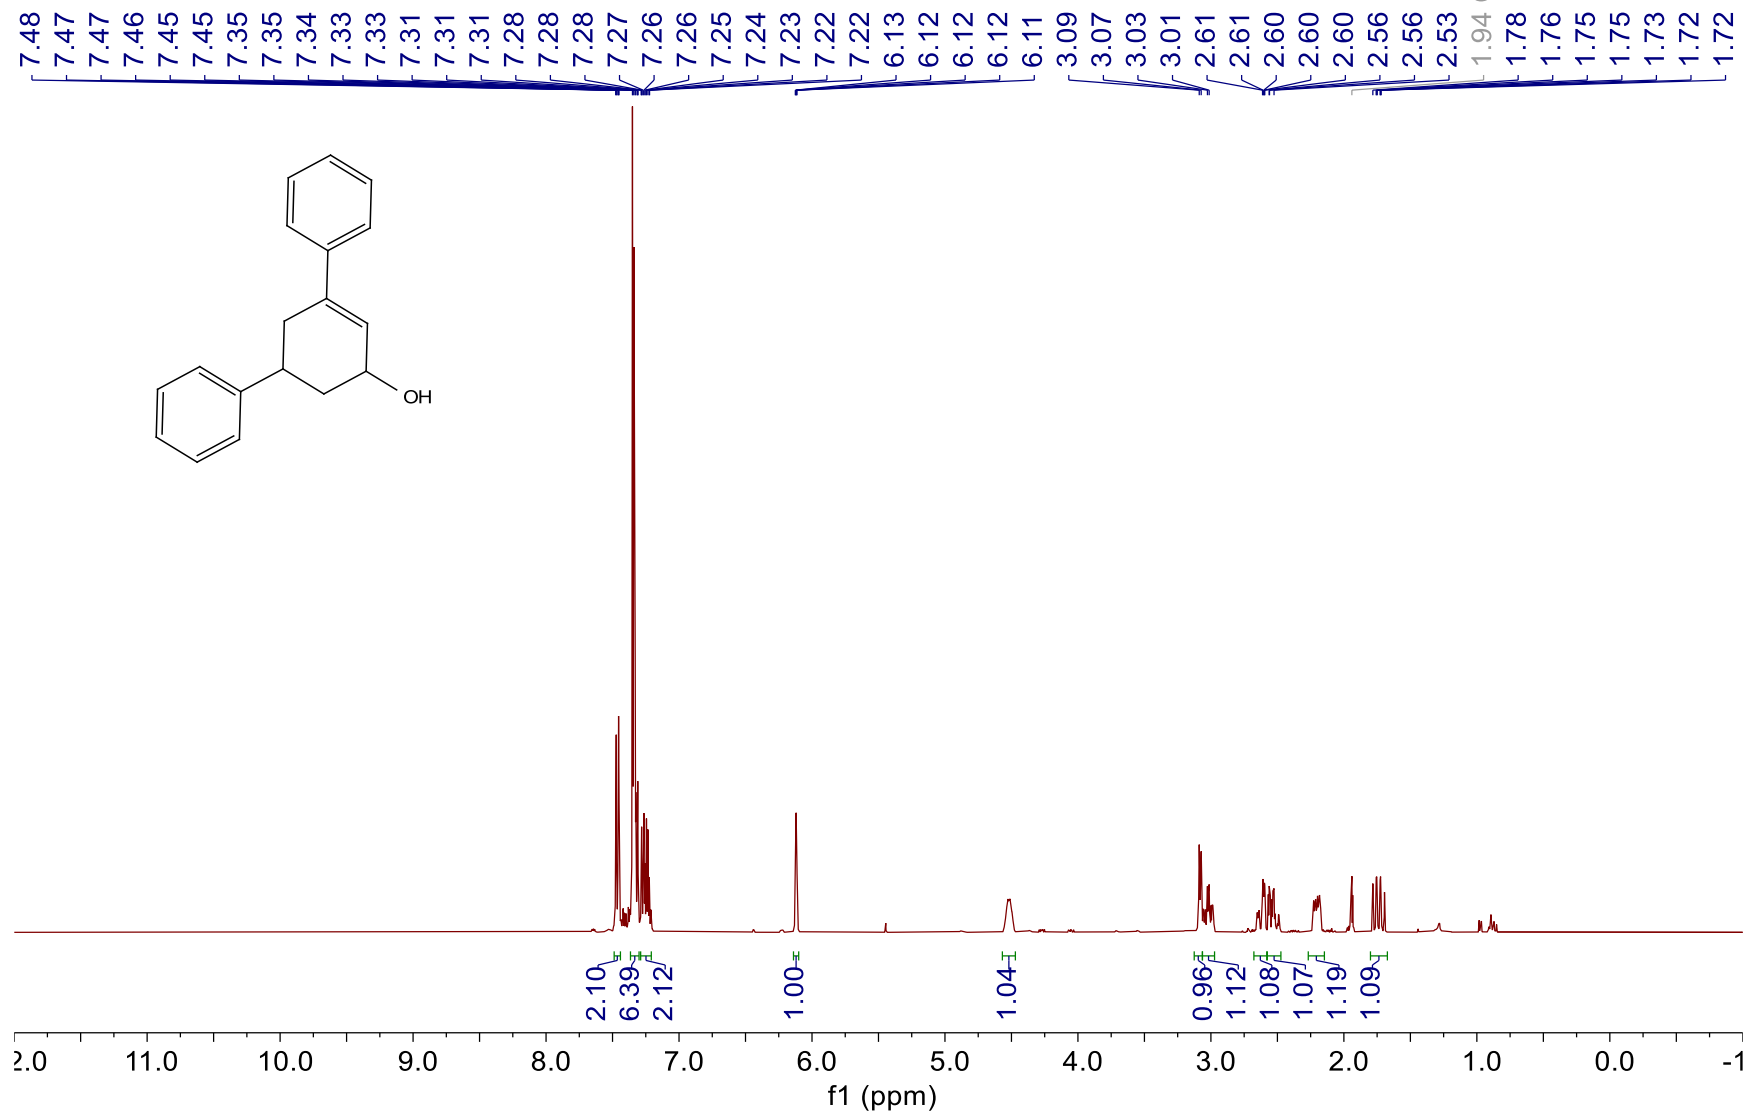

7 1',2',5',6'-tetrahydro-[1,1':3,1''-terphenyl]-5'-ol  
13C NMR at 100.63 MHz in CD3CN

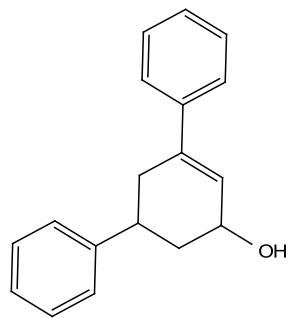

147.1  
142.0  
138.3  
129.8  
129.5  
129.4  
128.3  
127.9  
127.3  
126.3

69.2

40.4  
39.9  
36.8

1.3 CD3CN

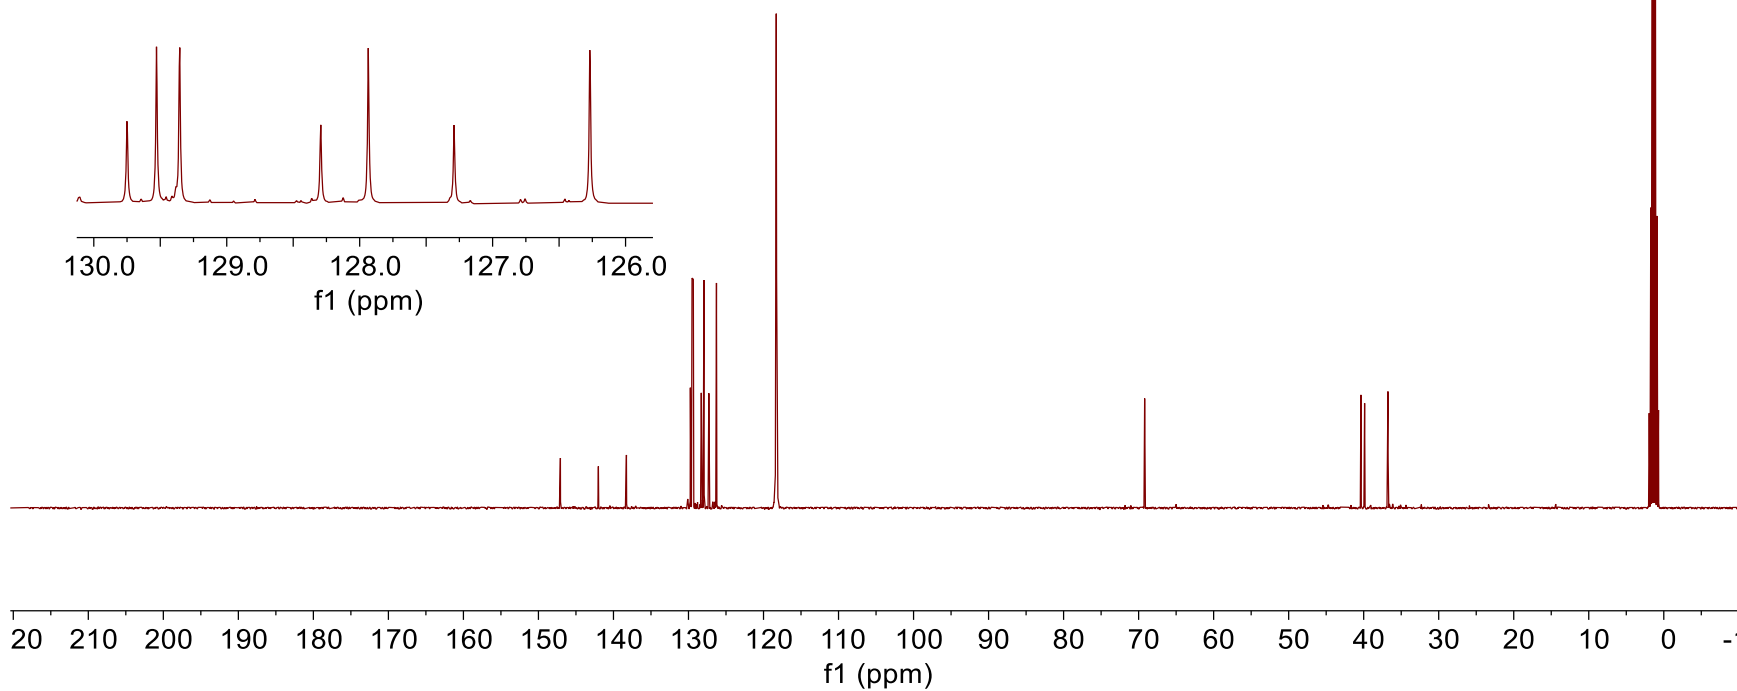

8 3,5-diphenylhex-5-enal  
1H NMR at 400.15 MHz in CD2Cl2

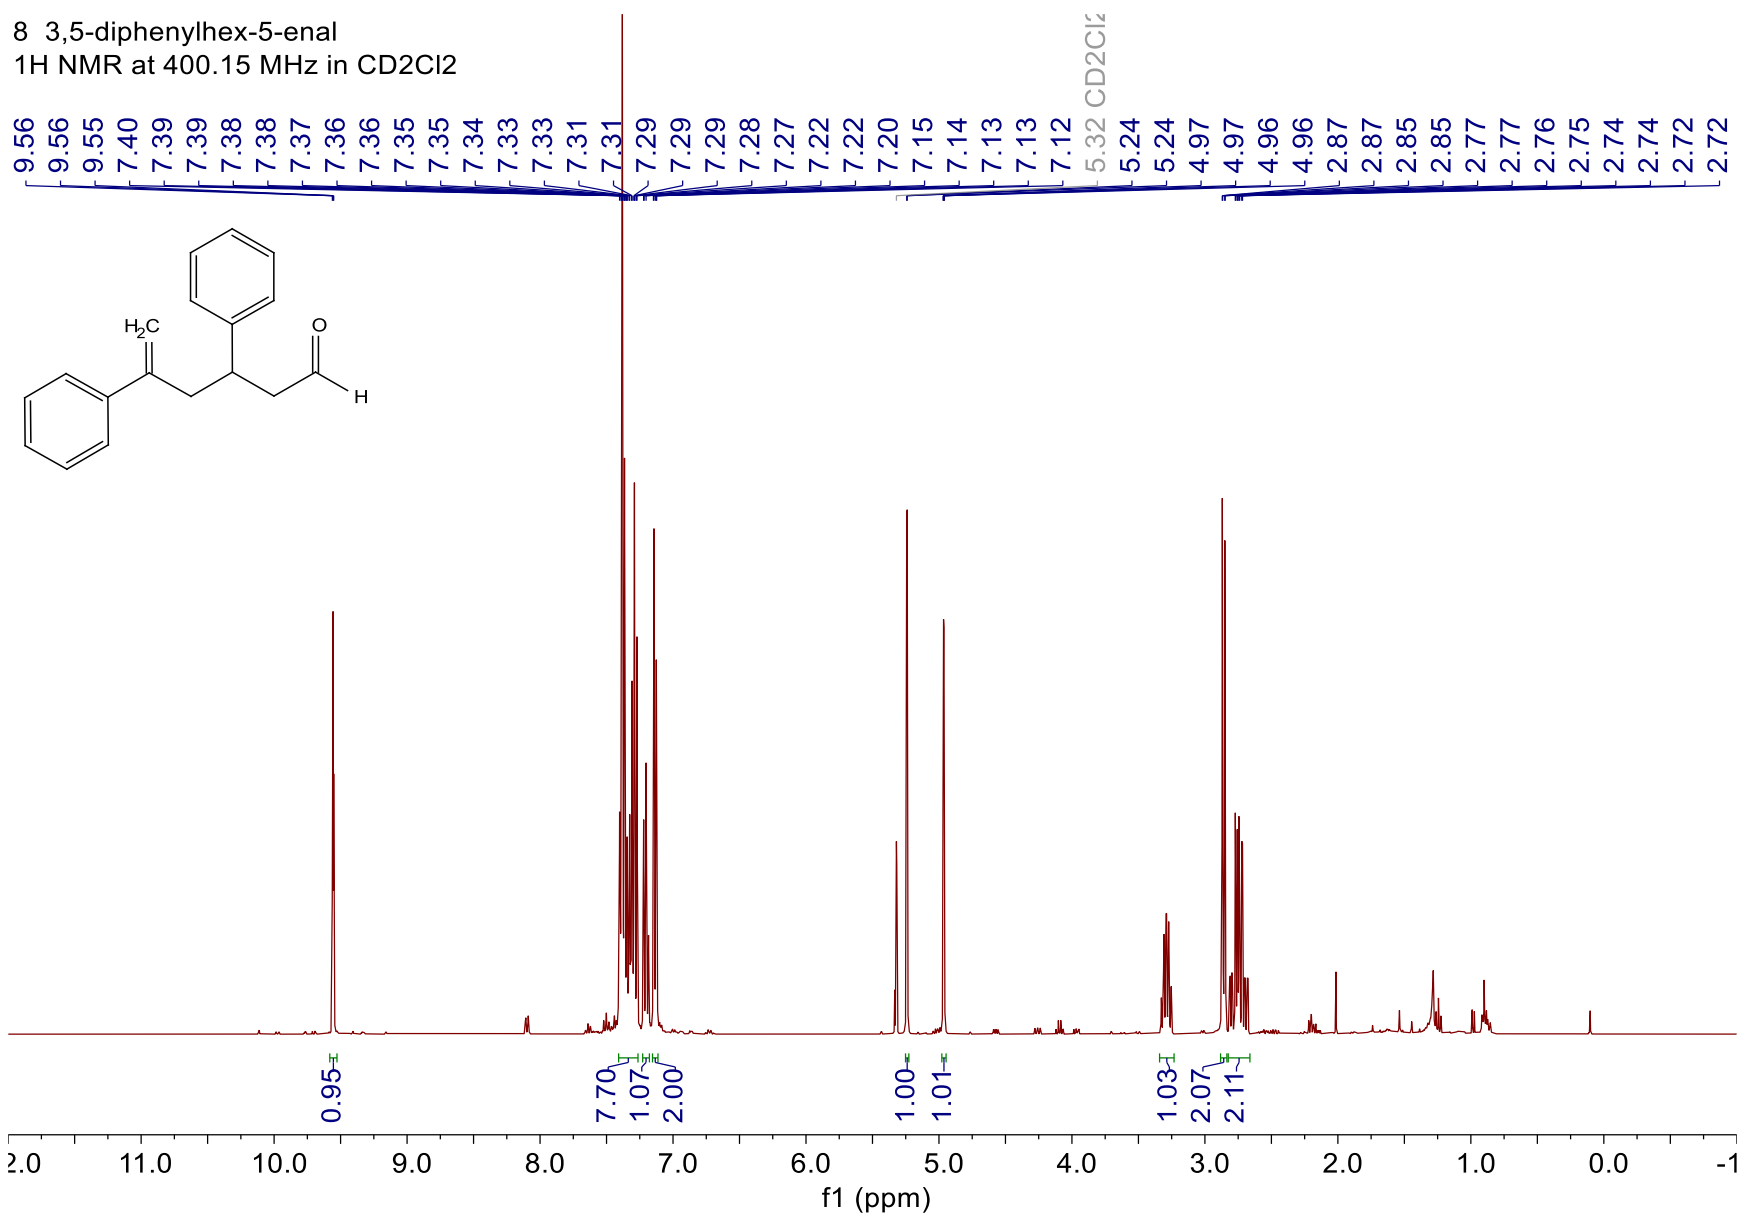

8 3,5-diphenylhex-5-enal  
13C NMR at 100.63 MHz in CD2Cl2

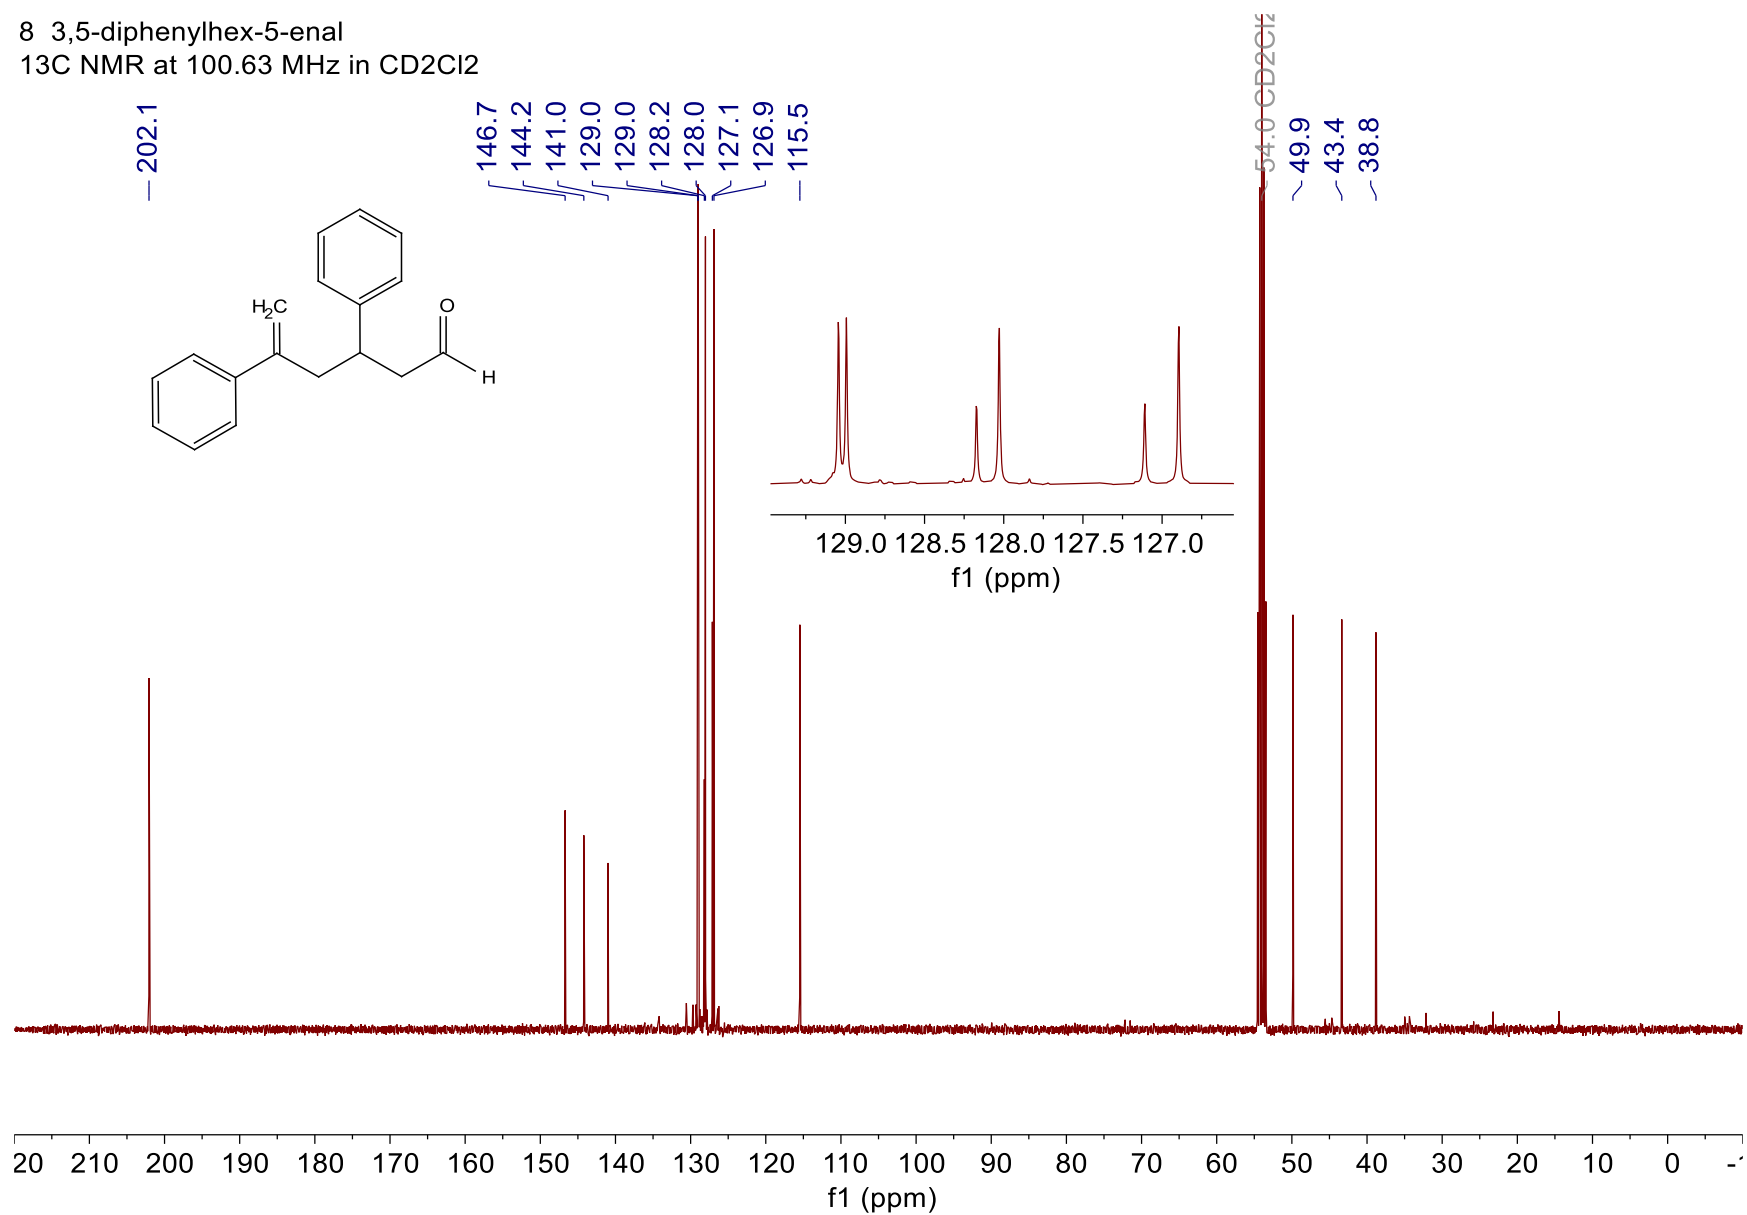

## 8 3,5-diphenylhex-5-enal

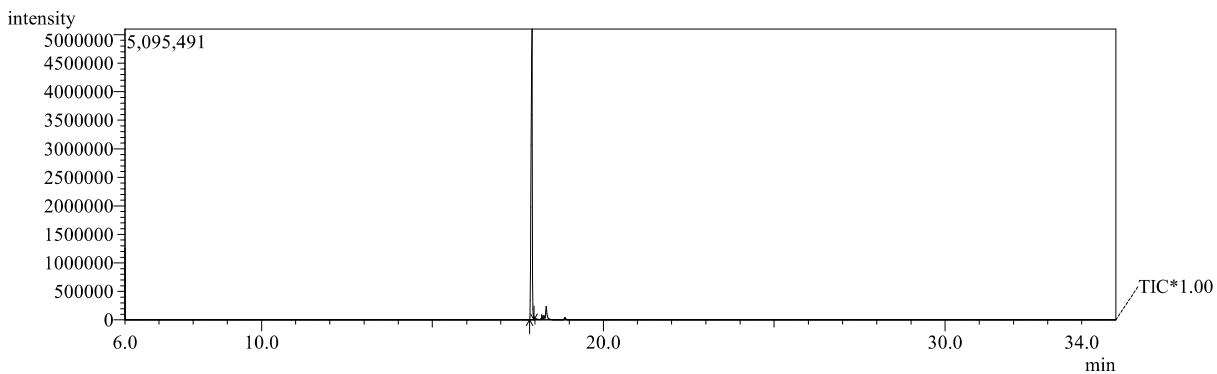

Spectrum

MassPeaks:108  
RawMode:Averaged 17.9-17.9(1430-1432) BasePeak:105(1302493)  
BG Mode:Calc. from Peak

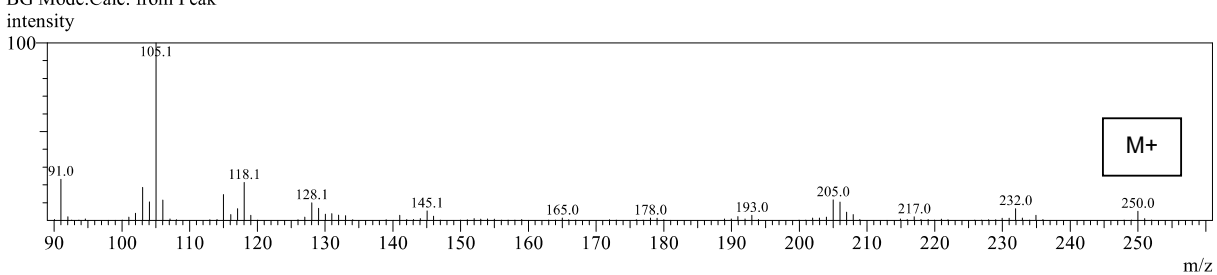

9 5'-phenyl-4-(trifluoromethyl)-3',4'-dihydro-[1,1':3',1''-terphenyl]-1'(2'H)-ol  
1H NMR at 400.15 MHz in CD2Cl2

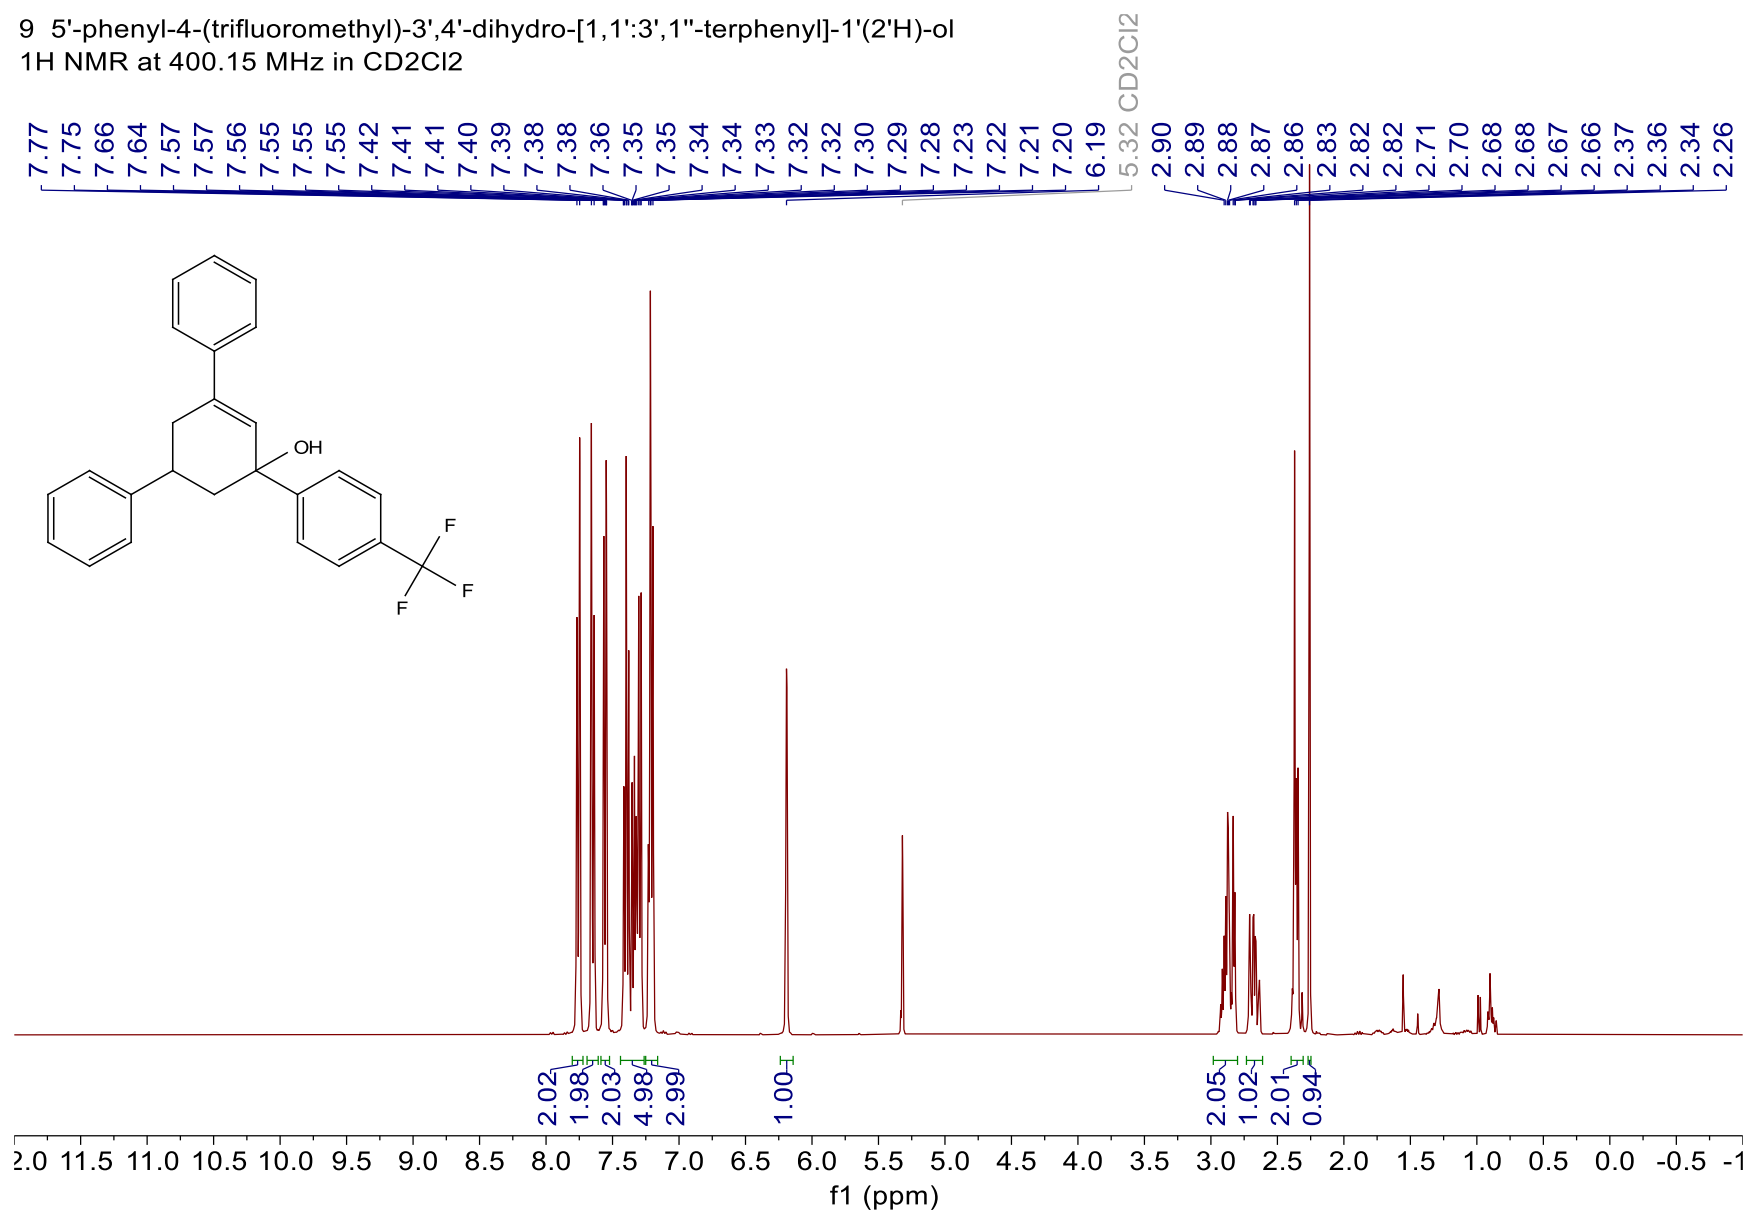



9 5'-phenyl-4-(trifluoromethyl)-3',4'-dihydro-[1,1':3',1''-terphenyl]-1'(2'H)-ol  
19F NMR at 376.48 MHz in CD2Cl2

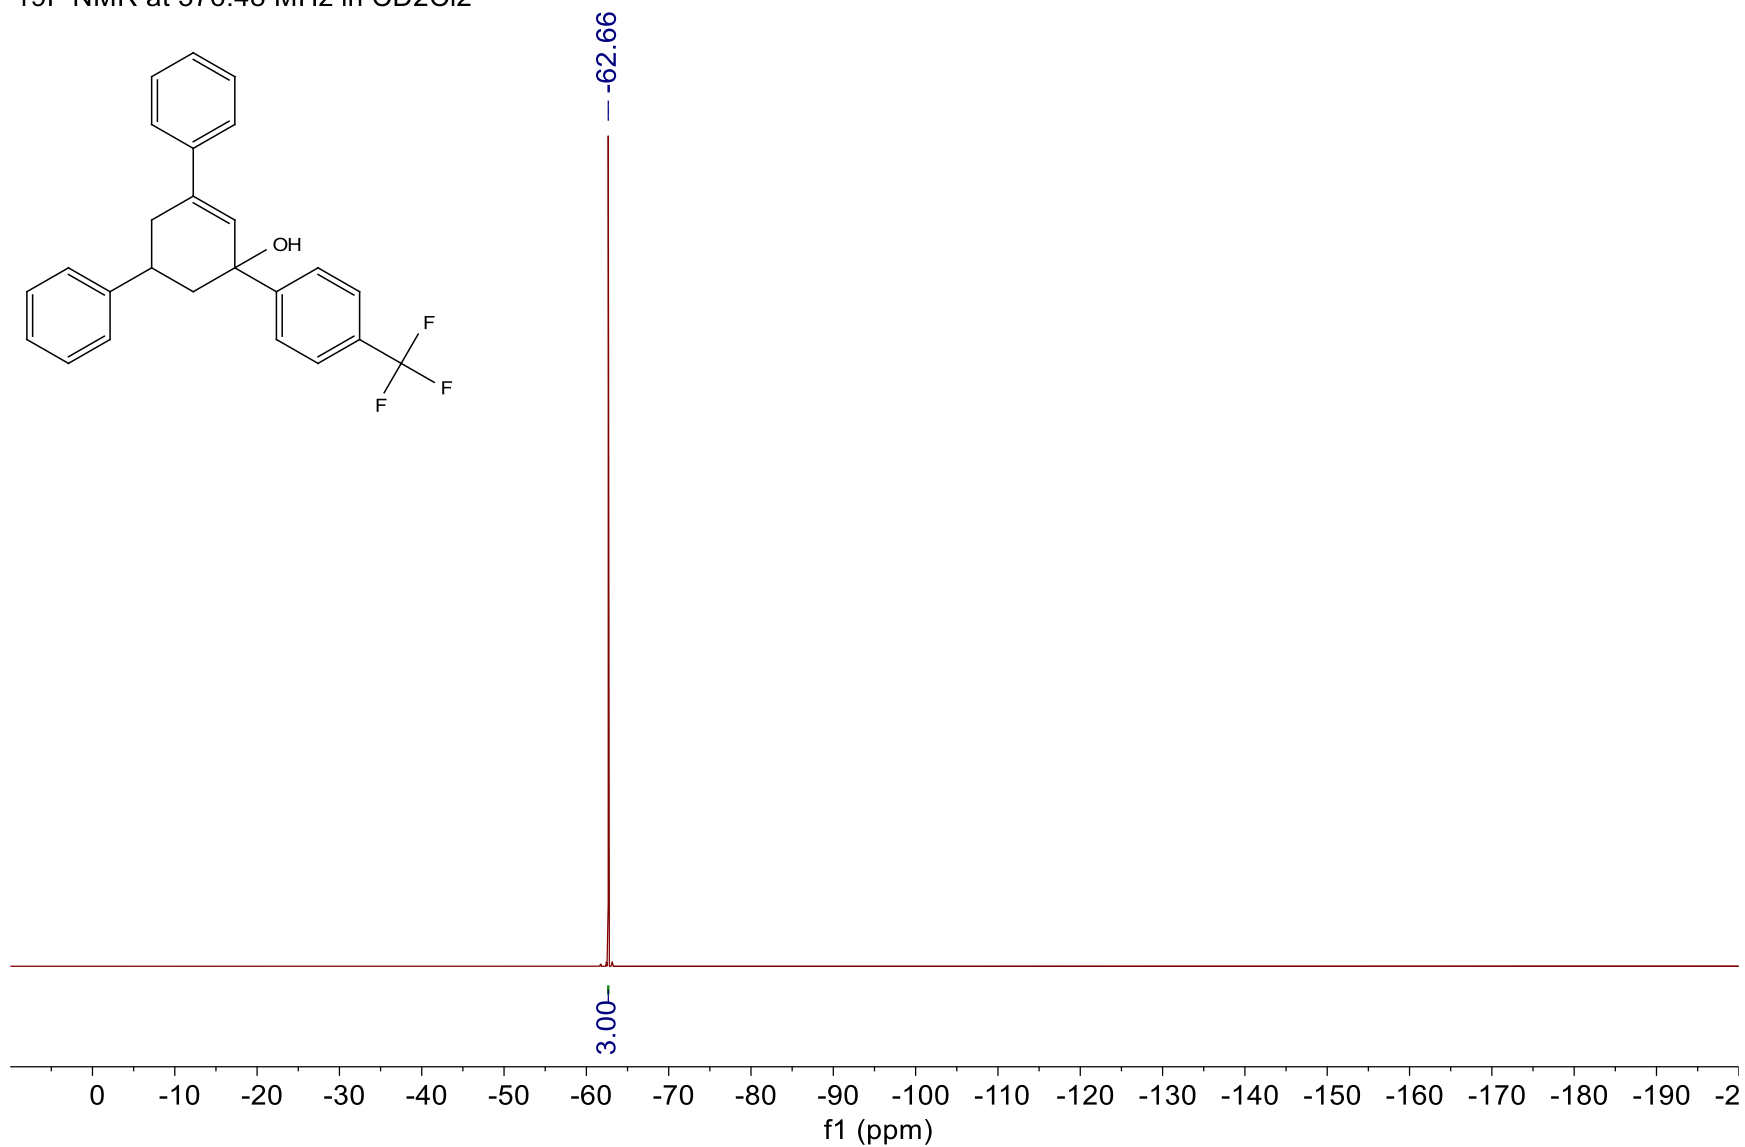

9 5'-phenyl-4-(trifluoromethyl)-3',4'-dihydro-[1,1':3',1''-terphenyl]-1'(2'H)-ol  
13C NMR at 100.63 MHz in CD2Cl2

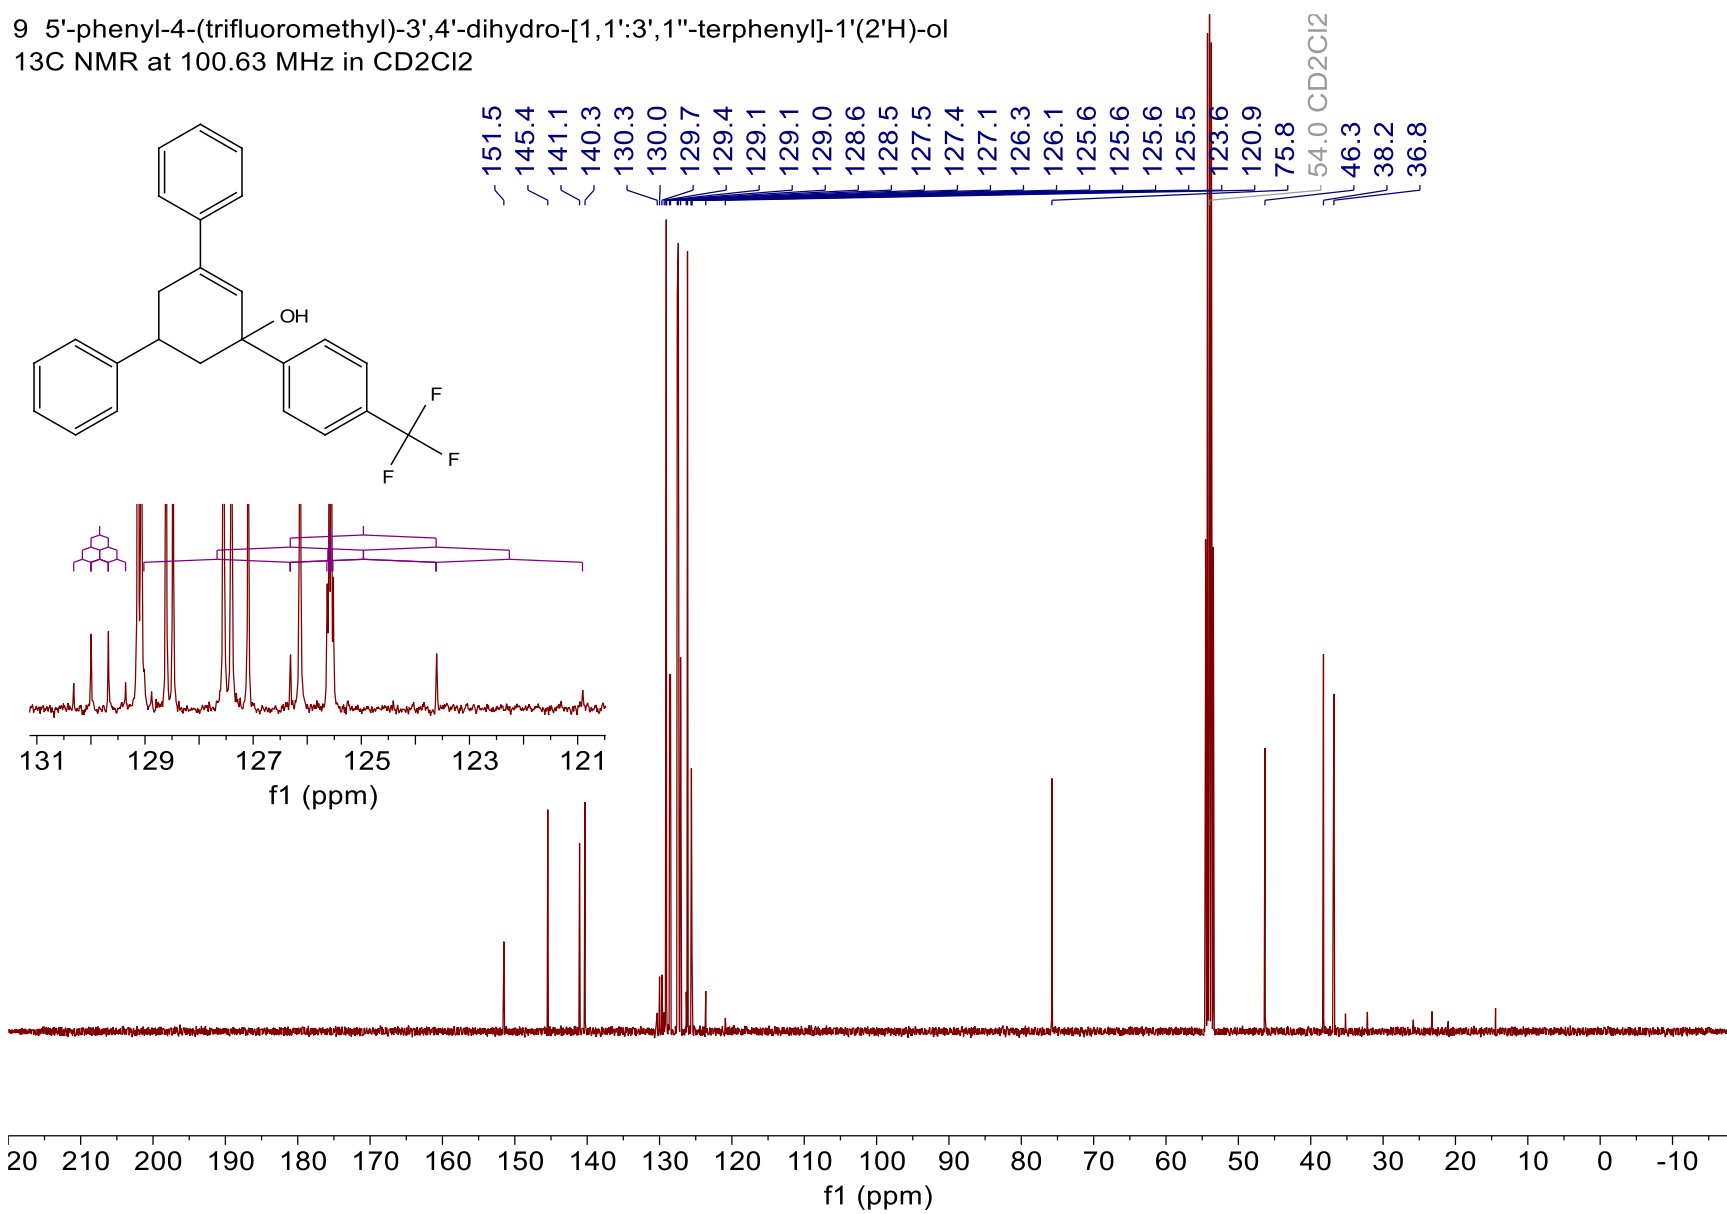

10 3,5-diphenyl-1-(4-(trifluoromethyl)phenyl)hex-5-en-1-one  
1H NMR at 400.15 MHz in CD2Cl2

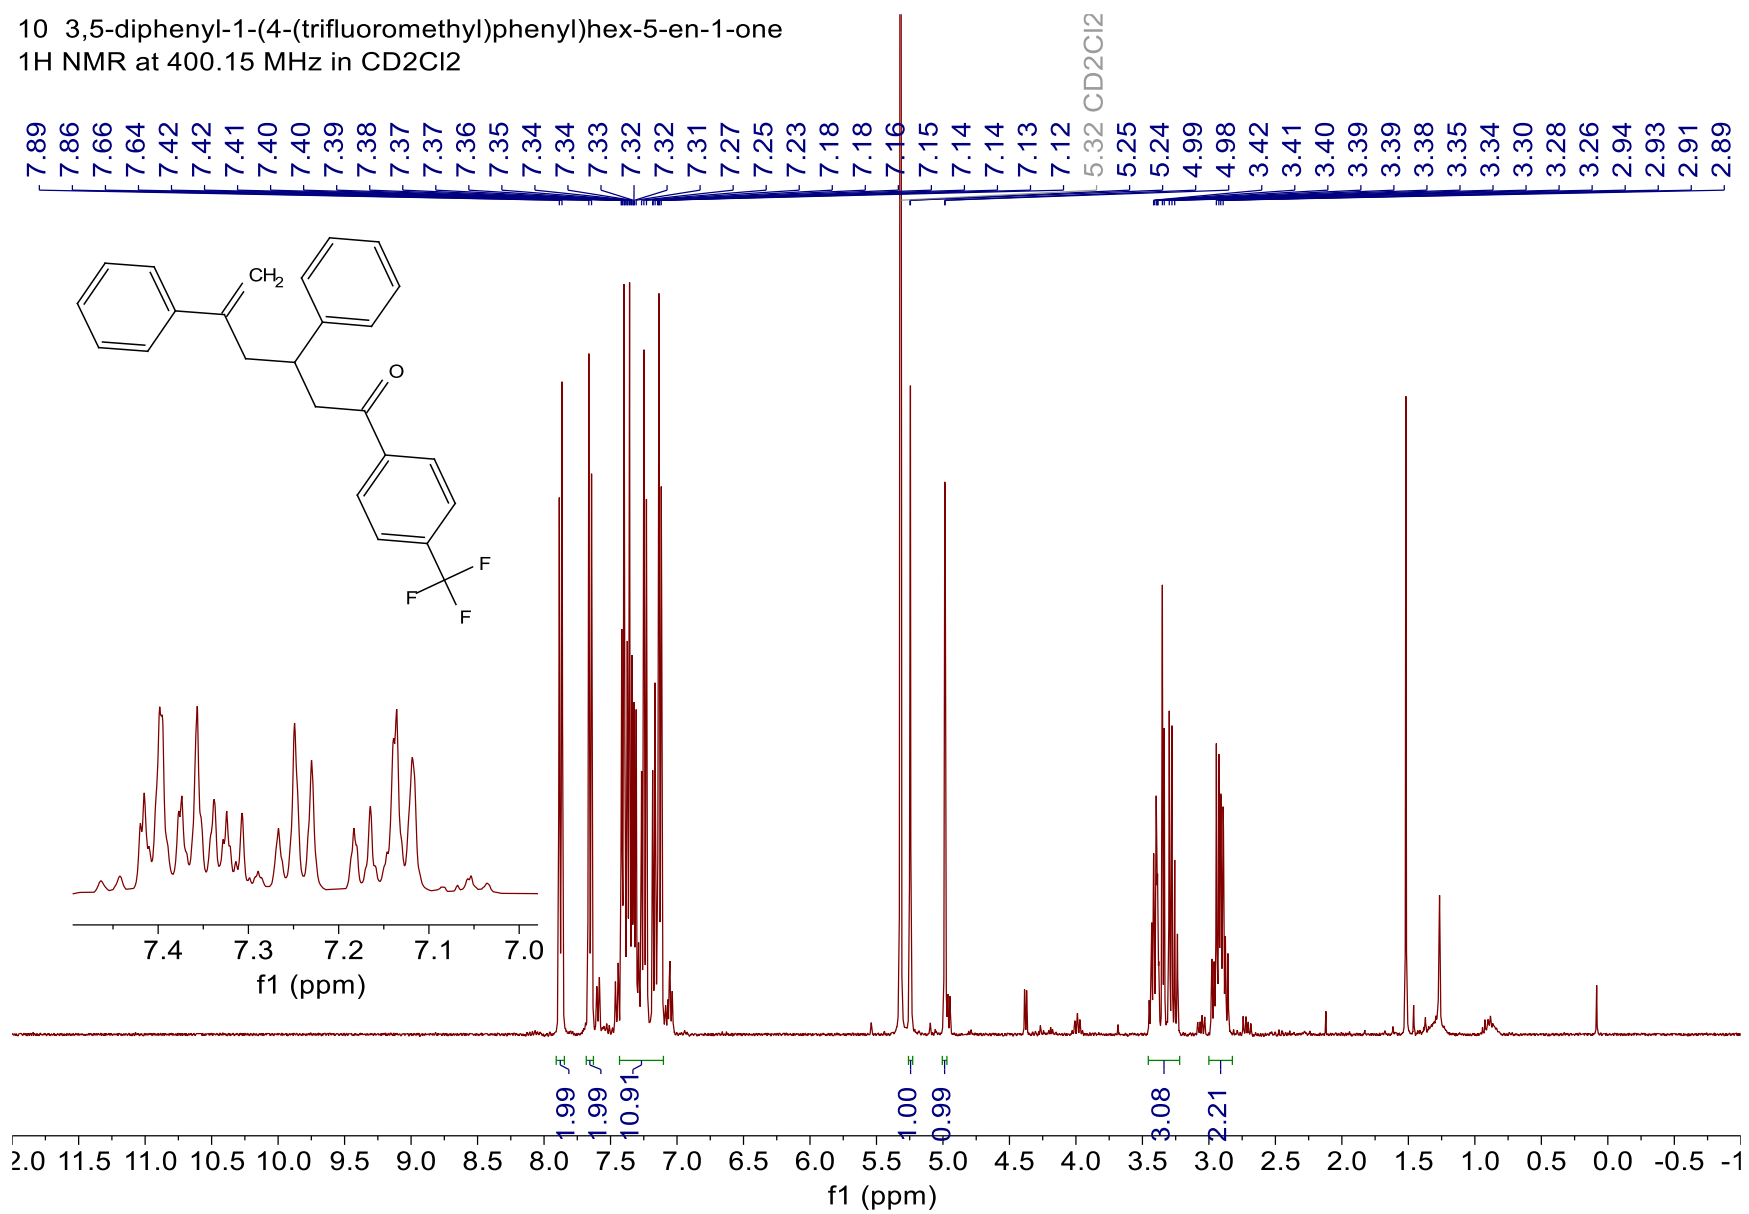

10 3,5-diphenyl-1-(4-(trifluoromethyl)phenyl)hex-5-en-1-one  
19F NMR at 376.48 MHz in CD2Cl2

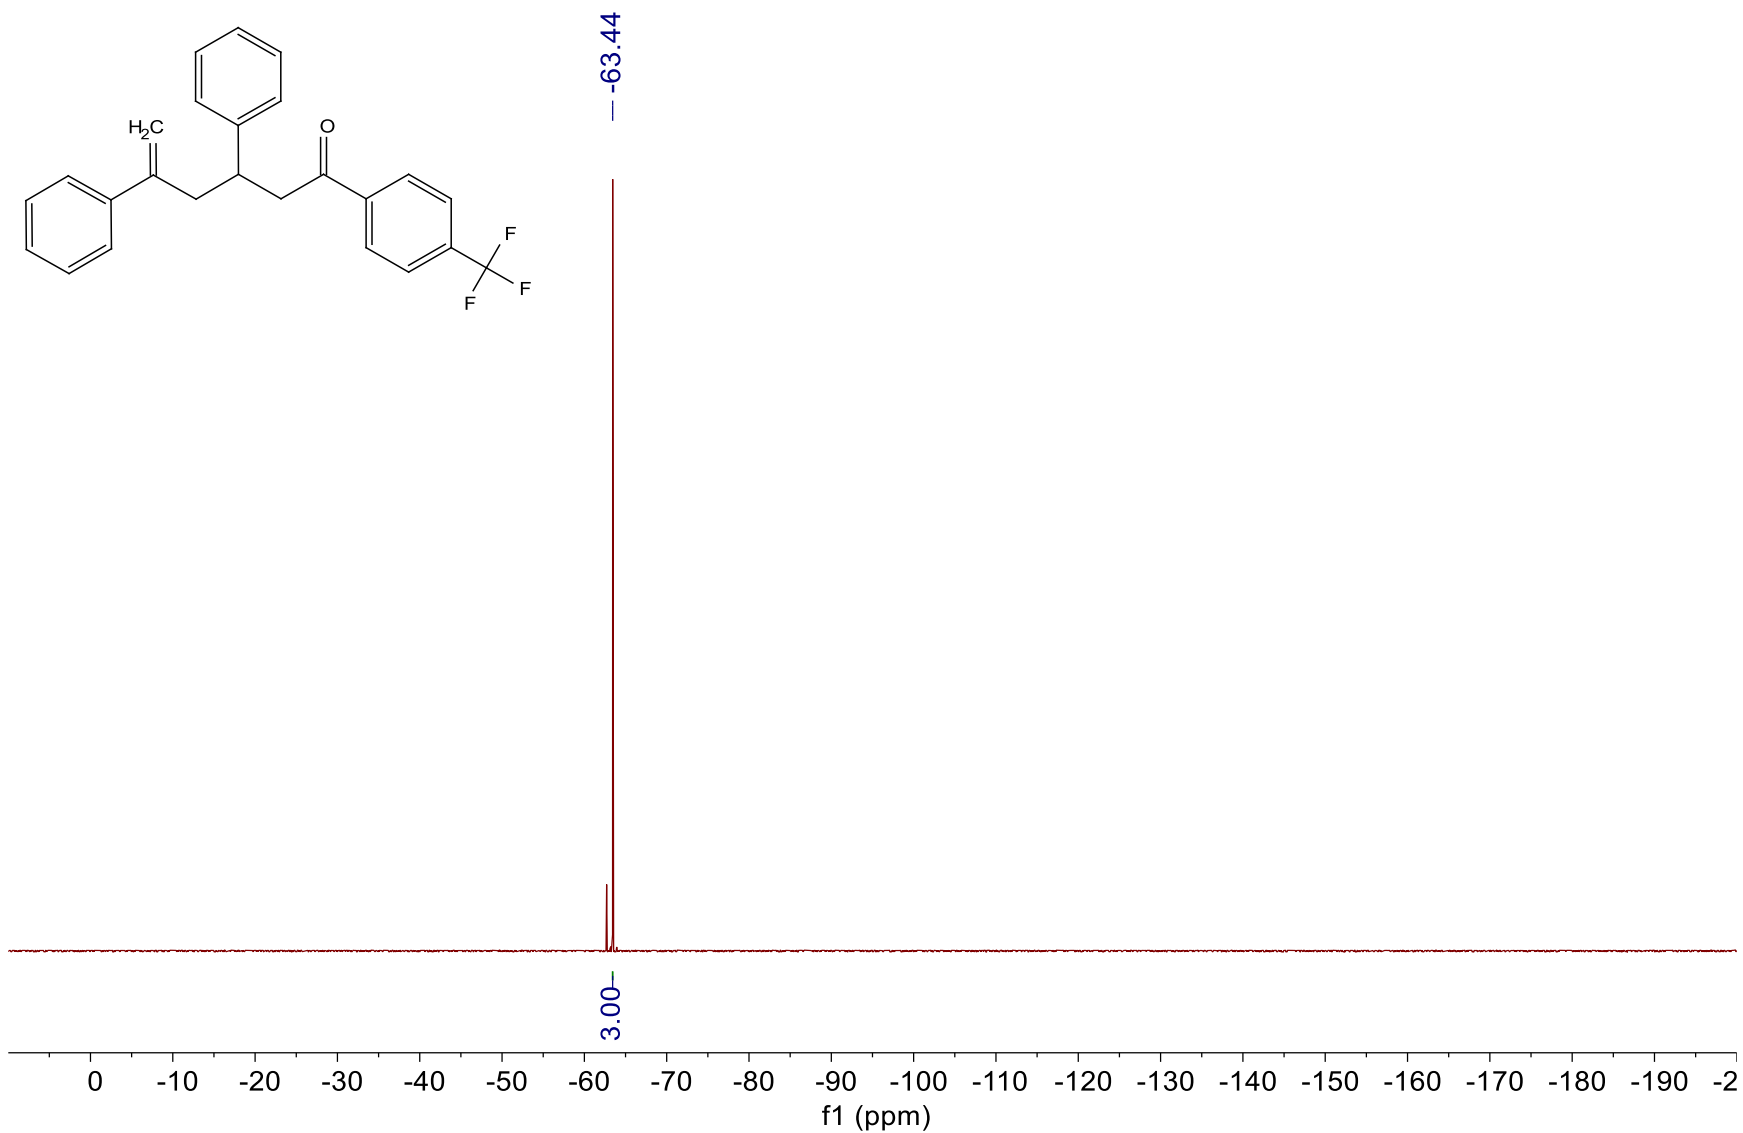

10 3,5-diphenyl-1-(4-(trifluoromethyl)phenyl)hex-5-en-1-one  
13C NMR at 100.63 MHz in CD2Cl2

221.6  
170.1  
167.7  
164.1  
163.5  
157.7  
157.4  
152.1  
152.1  
152.0  
151.7  
151.3  
151.2  
151.0  
150.4  
150.2  
150.1  
149.7  
149.3  
149.3  
149.2  
149.2  
138.6

77.7  
77.2 CDCl3  
68.5  
66.3  
63.3

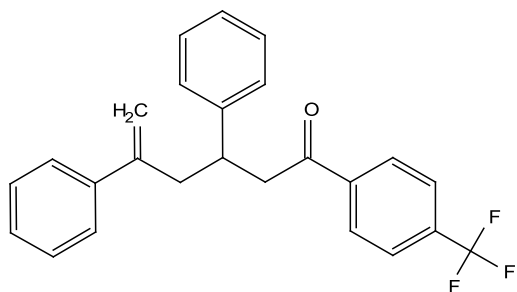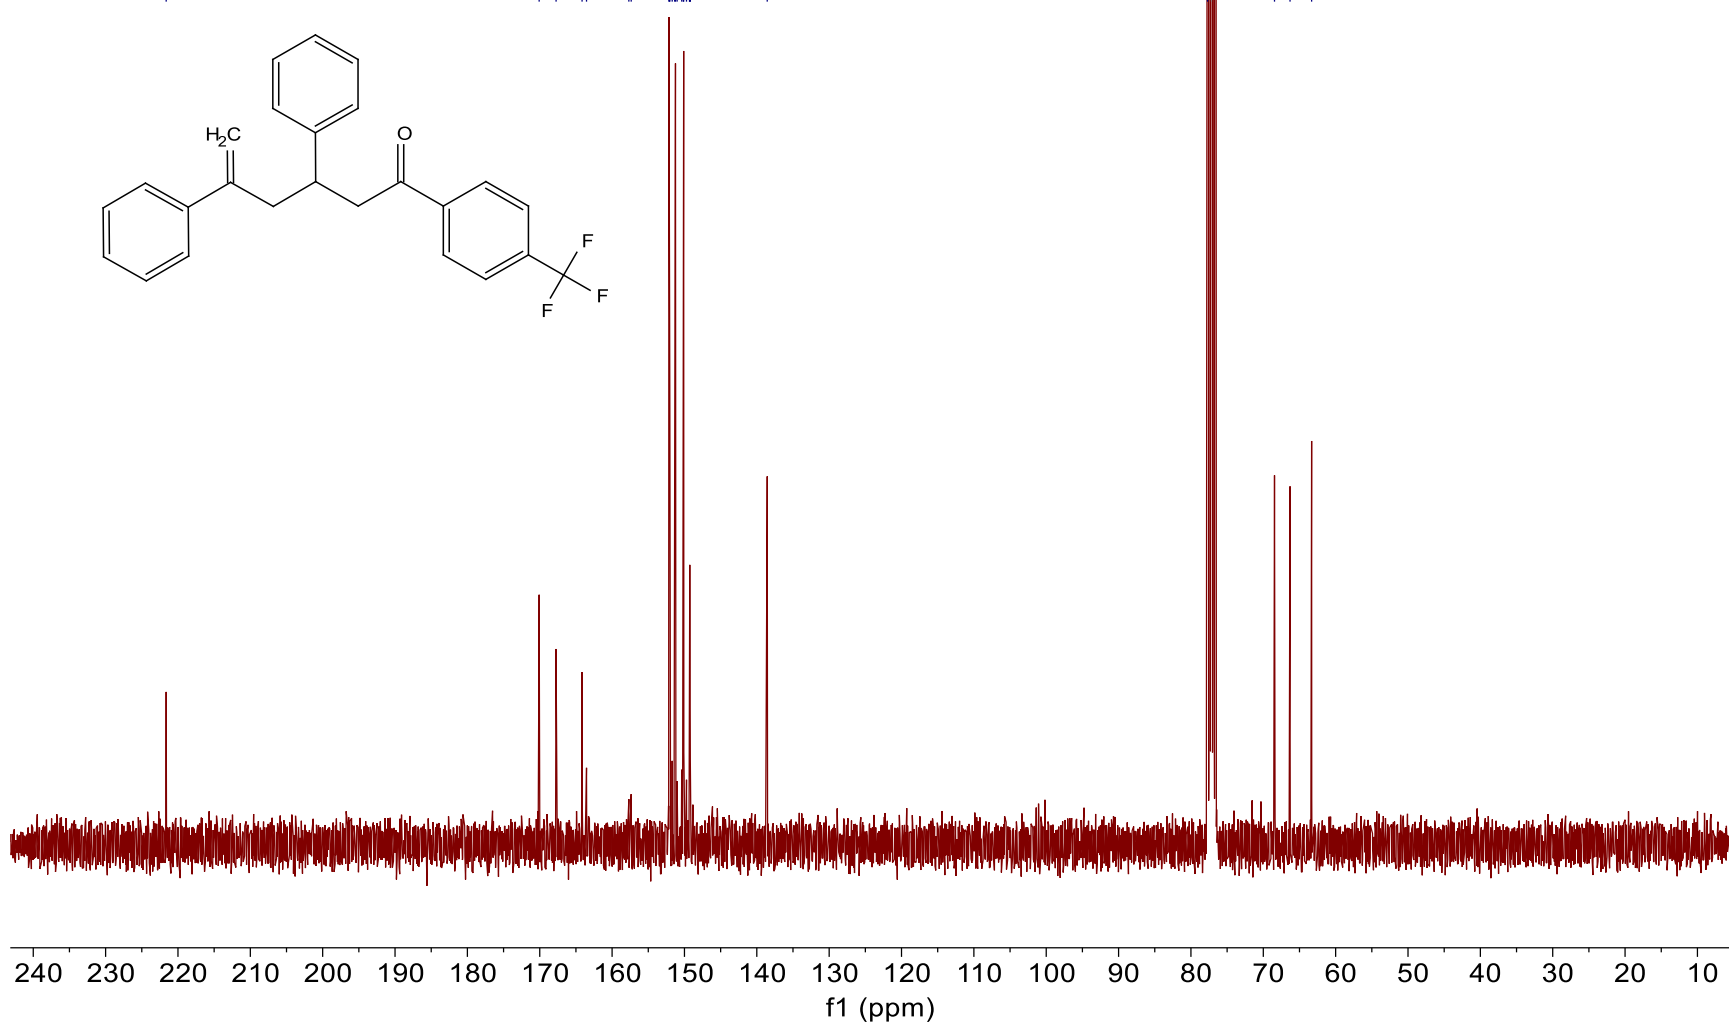

# 10 3,5-diphenyl-1-(4-(trifluoromethyl)phenyl)hex-5-en-1-one

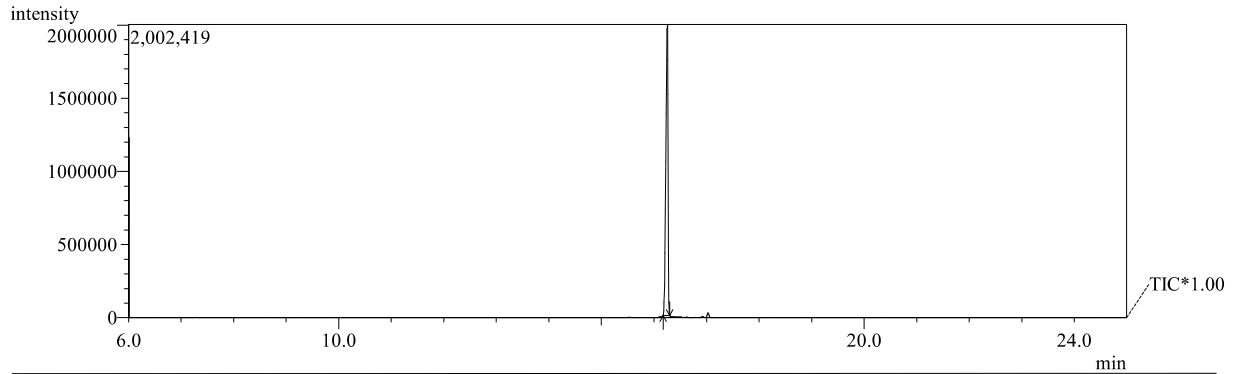

Spectrum

MassPeaks:77  
RawMode:Averaged 16.3-16.3(1231-1233) BasePeak:173(477758)  
BG Mode:Calc. from Peak  
intensity

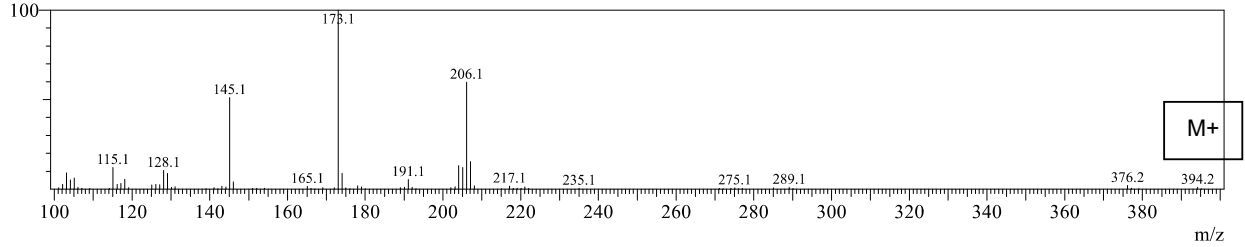

11a 5-methyl-4'-(trifluoromethyl)-3,4-dihydro-[1,1'-biphenyl]-1(2H)-ol  
1H NMR at 400.15 MHz in C6D6

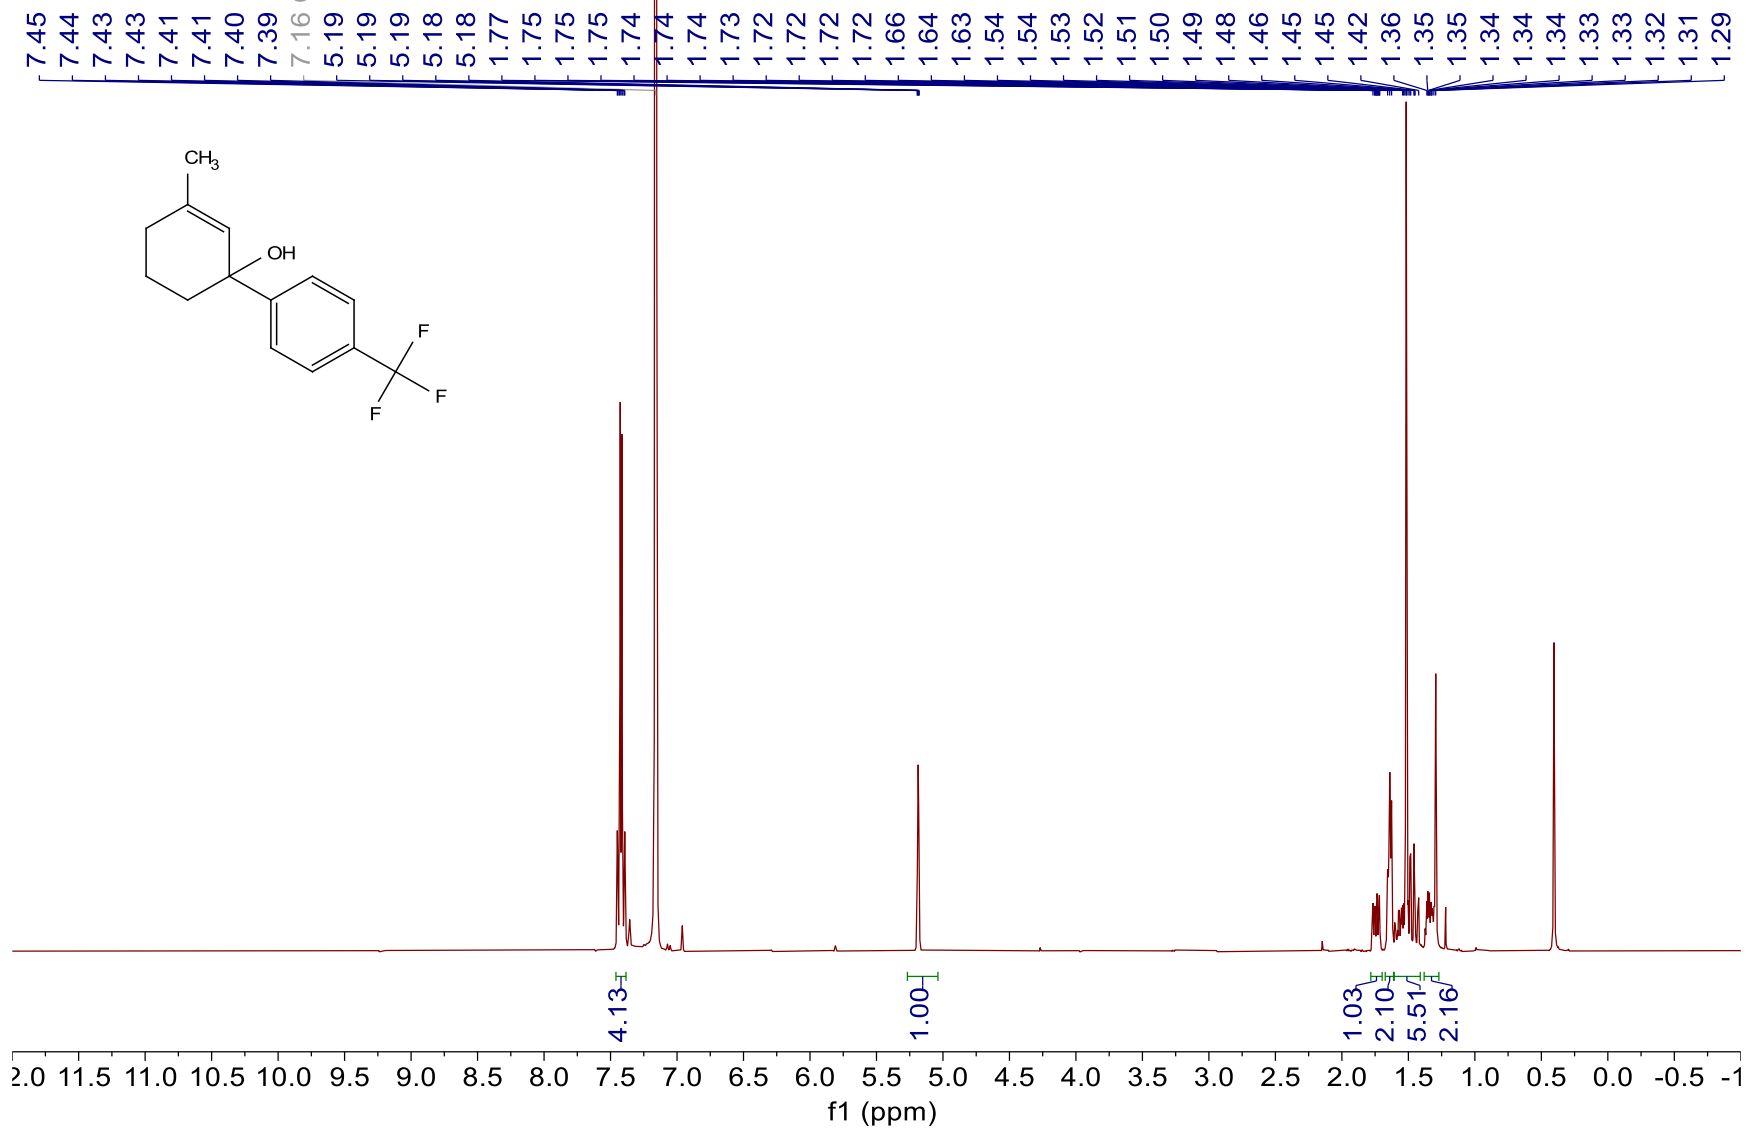

11a 5-methyl-4'-(trifluoromethyl)-3,4-dihydro-[1,1'-biphenyl]-1(2H)-ol  
19F NMR at 376.48 MHz in C6D6

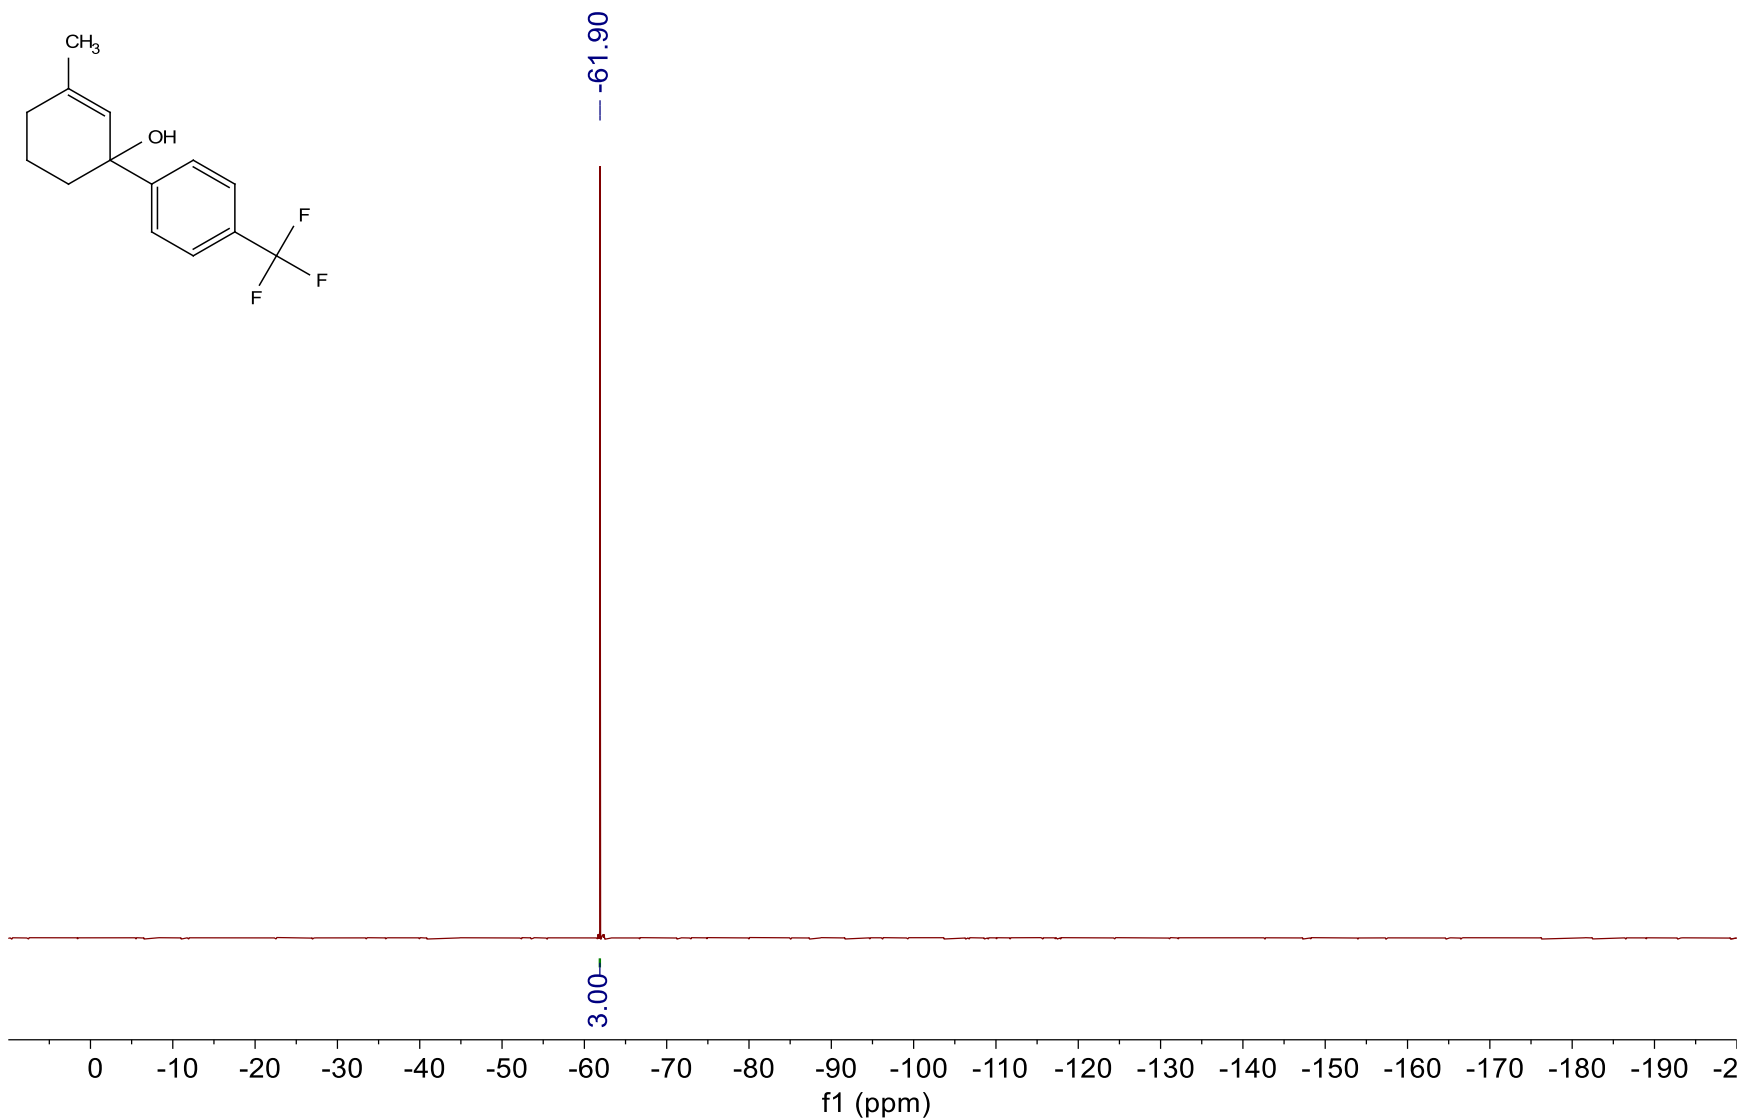



11a 5-methyl-4'-(trifluoromethyl)-3,4-dihydro-[1,1'-biphenyl]-(2H)-ol  
13C NMR at 100.63 MHz in C6D6

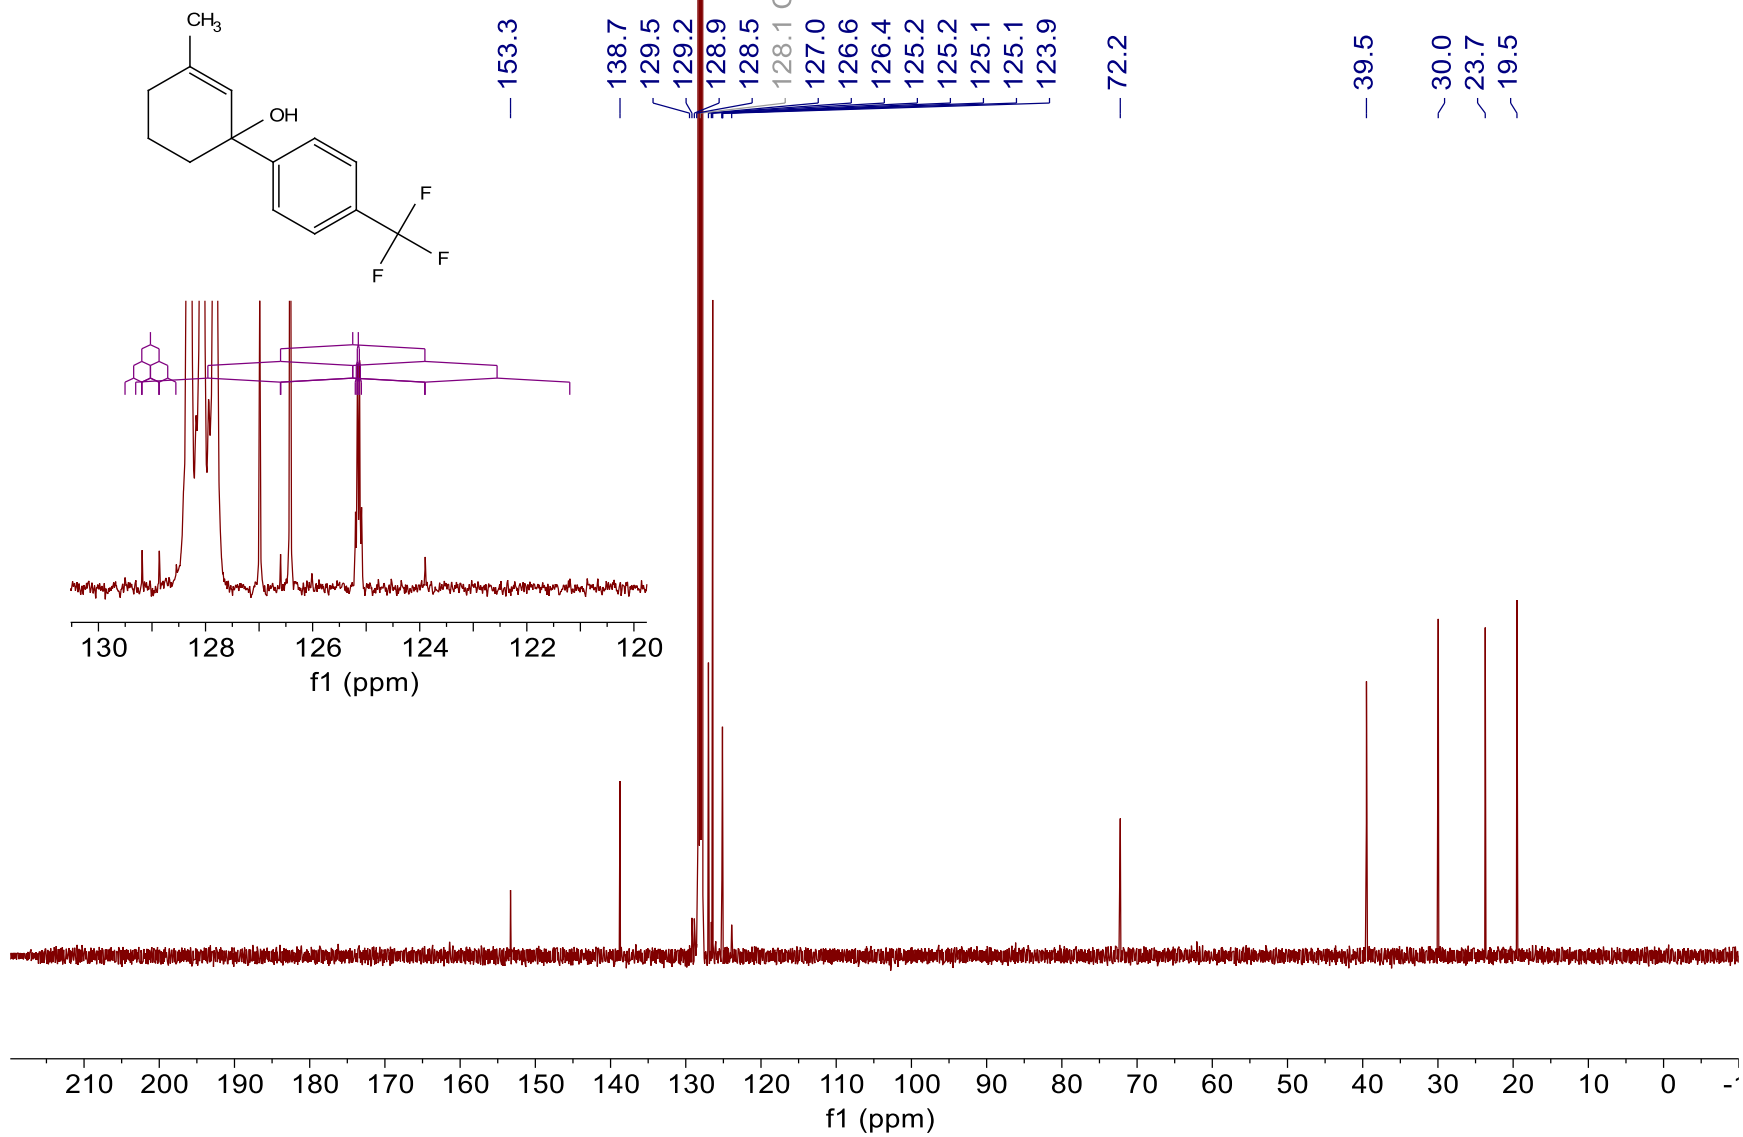

**11a 5-methyl-4'-(trifluoromethyl)-3,4-dihydro-[1,1'-biphenyl]-1(2H)-ol**

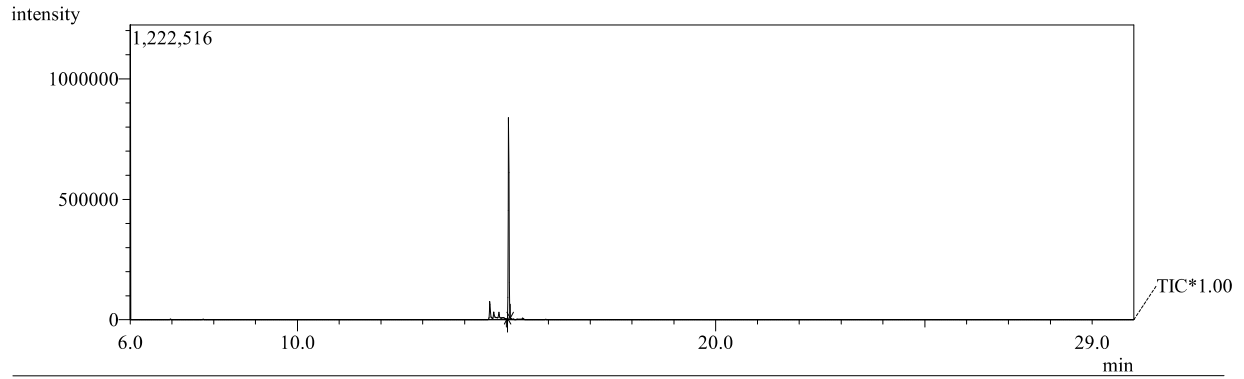

MassPeaks:104  
RawMode:Averaged 15.0-15.1(1086-1088) BasePeak:159(85360)  
BG Mode:Calc. from Peak

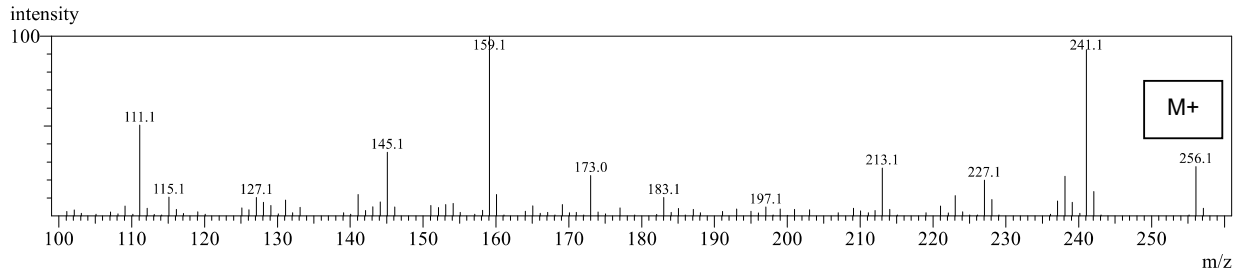

11b 3-methyl-4'-(trifluoromethyl)-3,4,5,6-tetrahydro-[1,1'-biphenyl]-3-ol  
1H NMR at 400.15 MHz in CDCl3

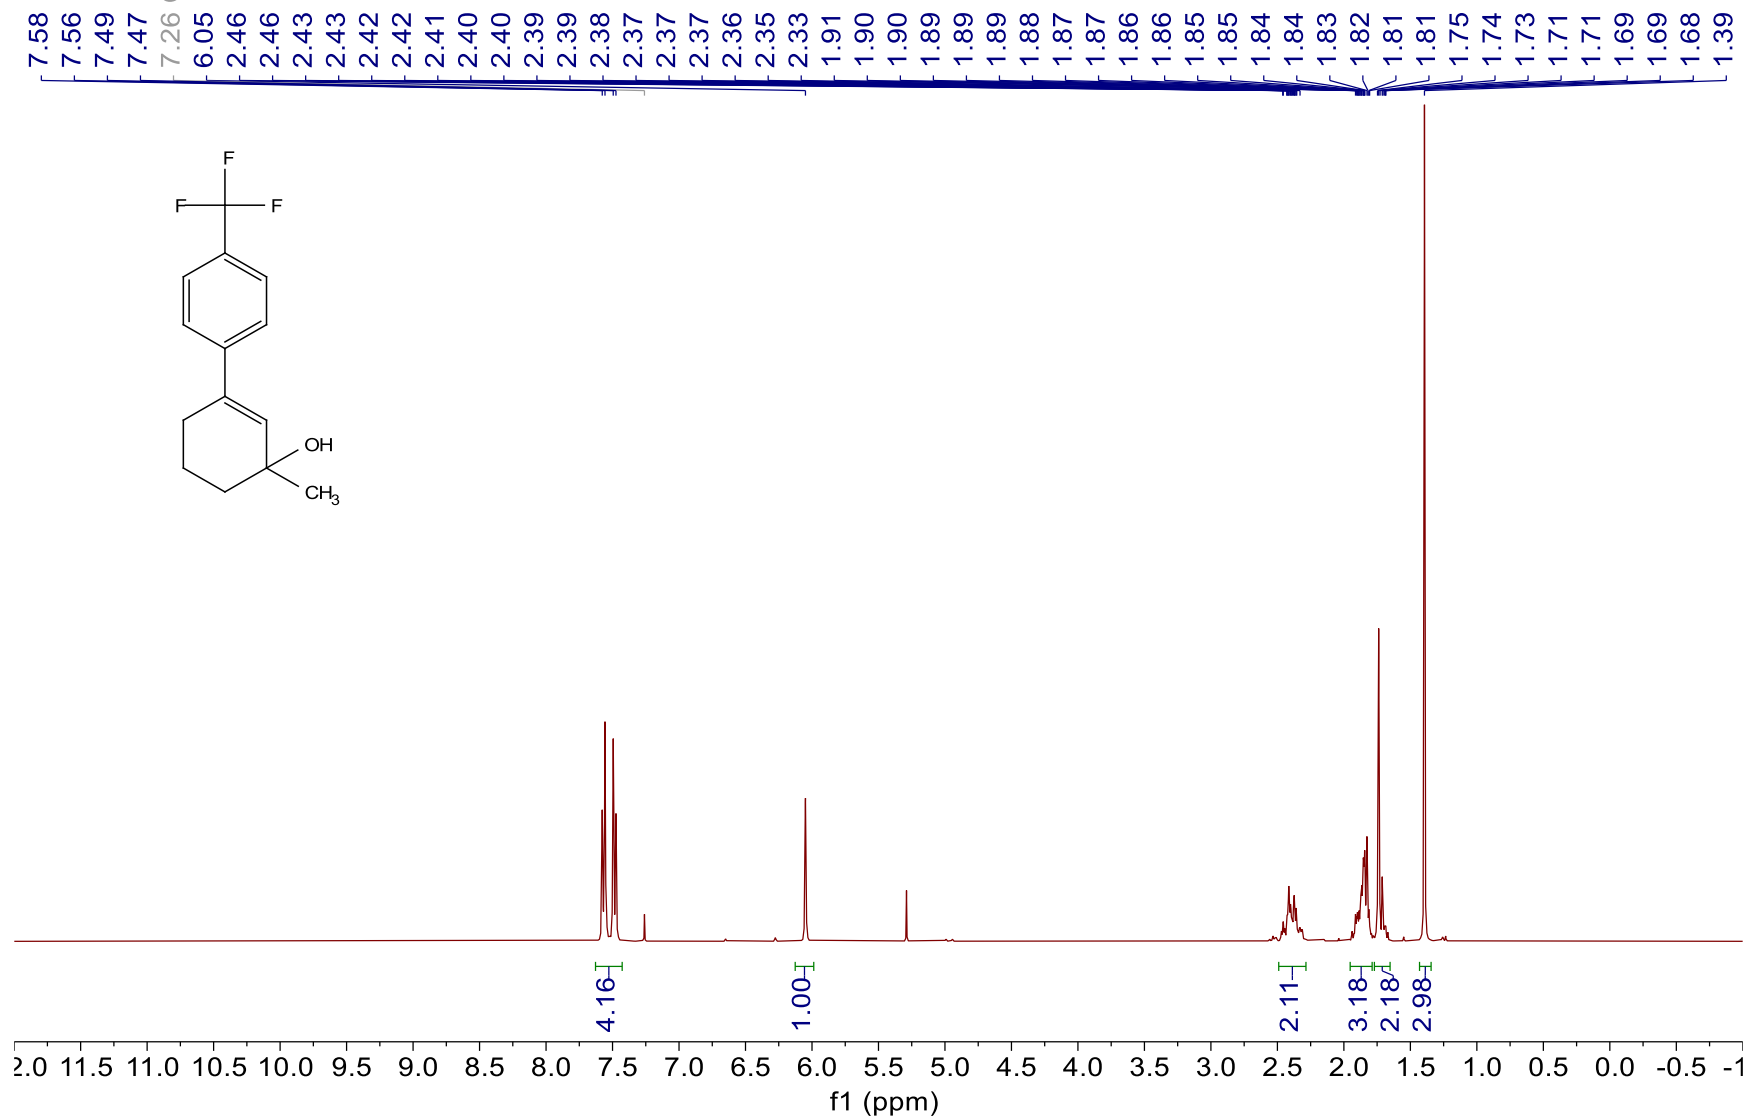

11b 3-methyl-4'-(trifluoromethyl)-3,4,5,6-tetrahydro-[1,1'-biphenyl]-3-ol  
19F NMR at 376.48 MHz in CDCl3

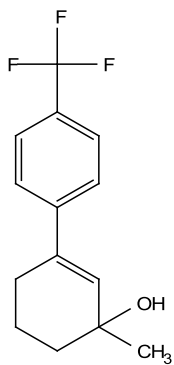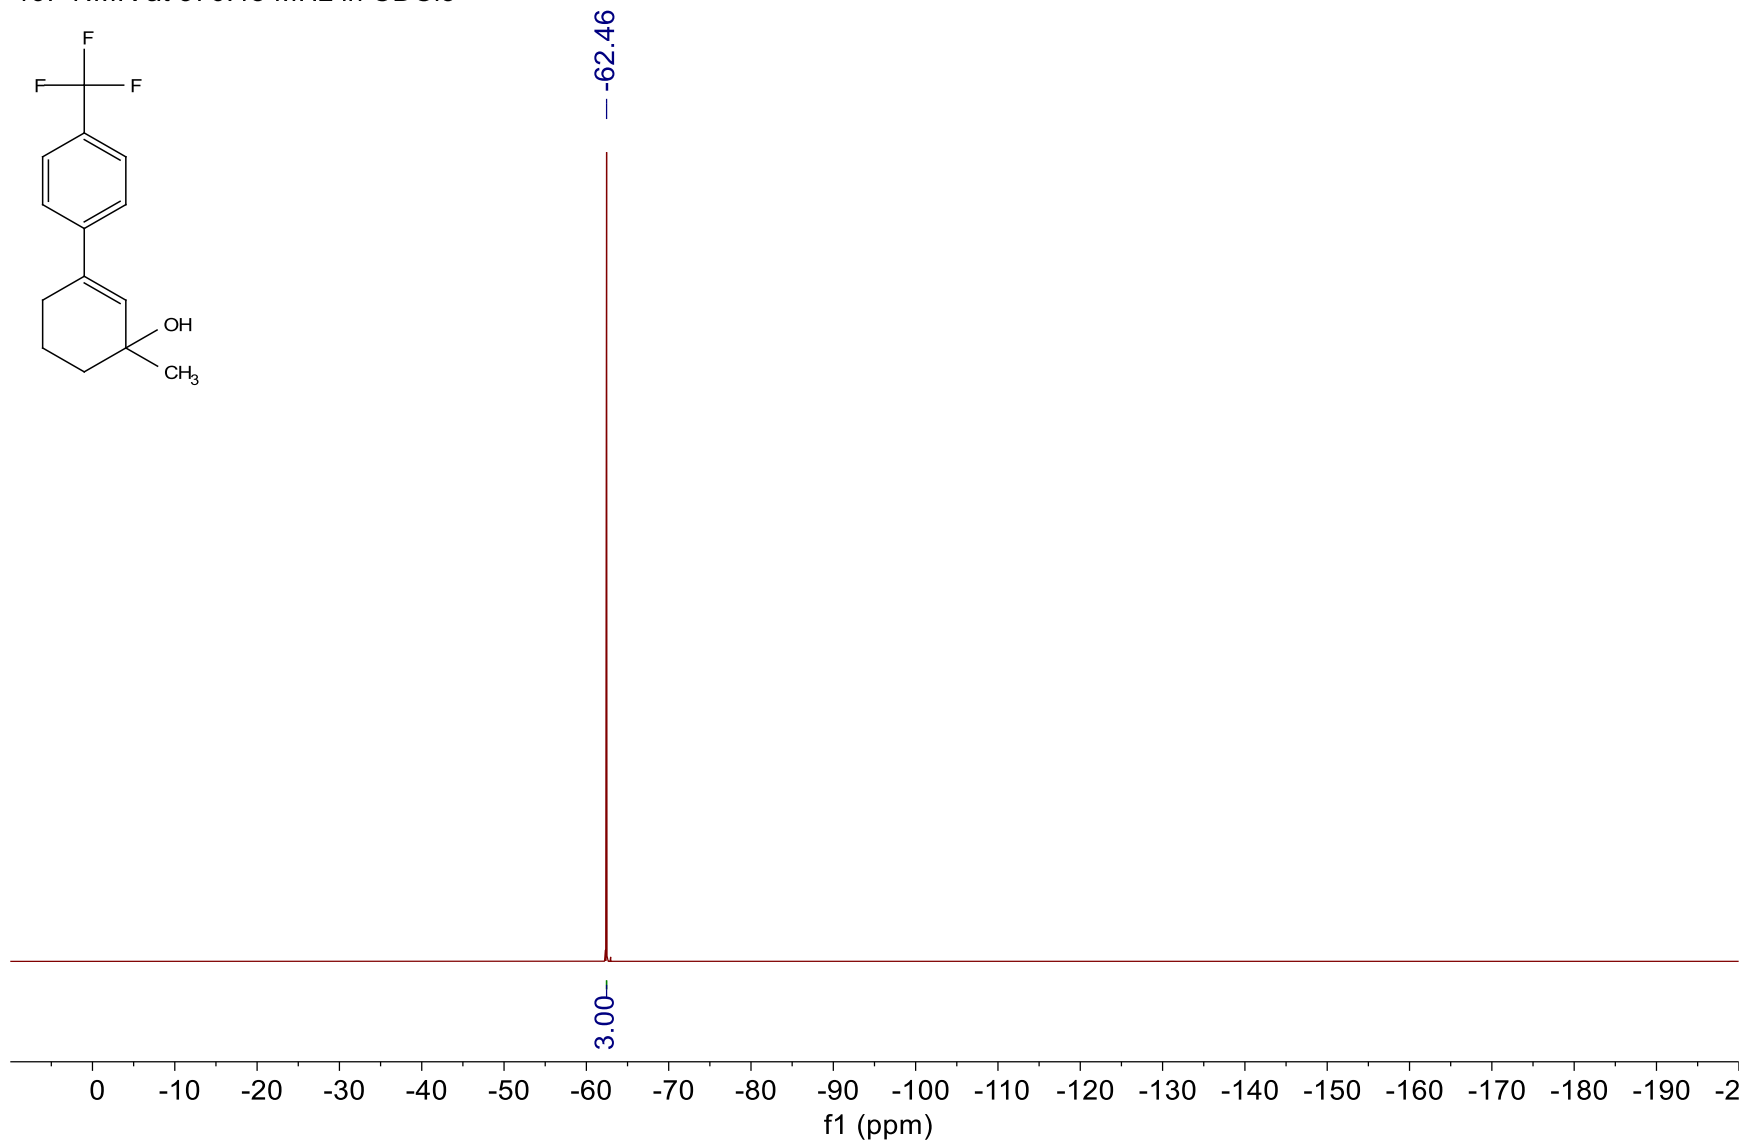

11b 3-methyl-4'-(trifluoromethyl)-3,4,5,6-tetrahydro-[1,1'-biphenyl]-3-ol  
13C NMR at 100.63 MHz in CDCl3

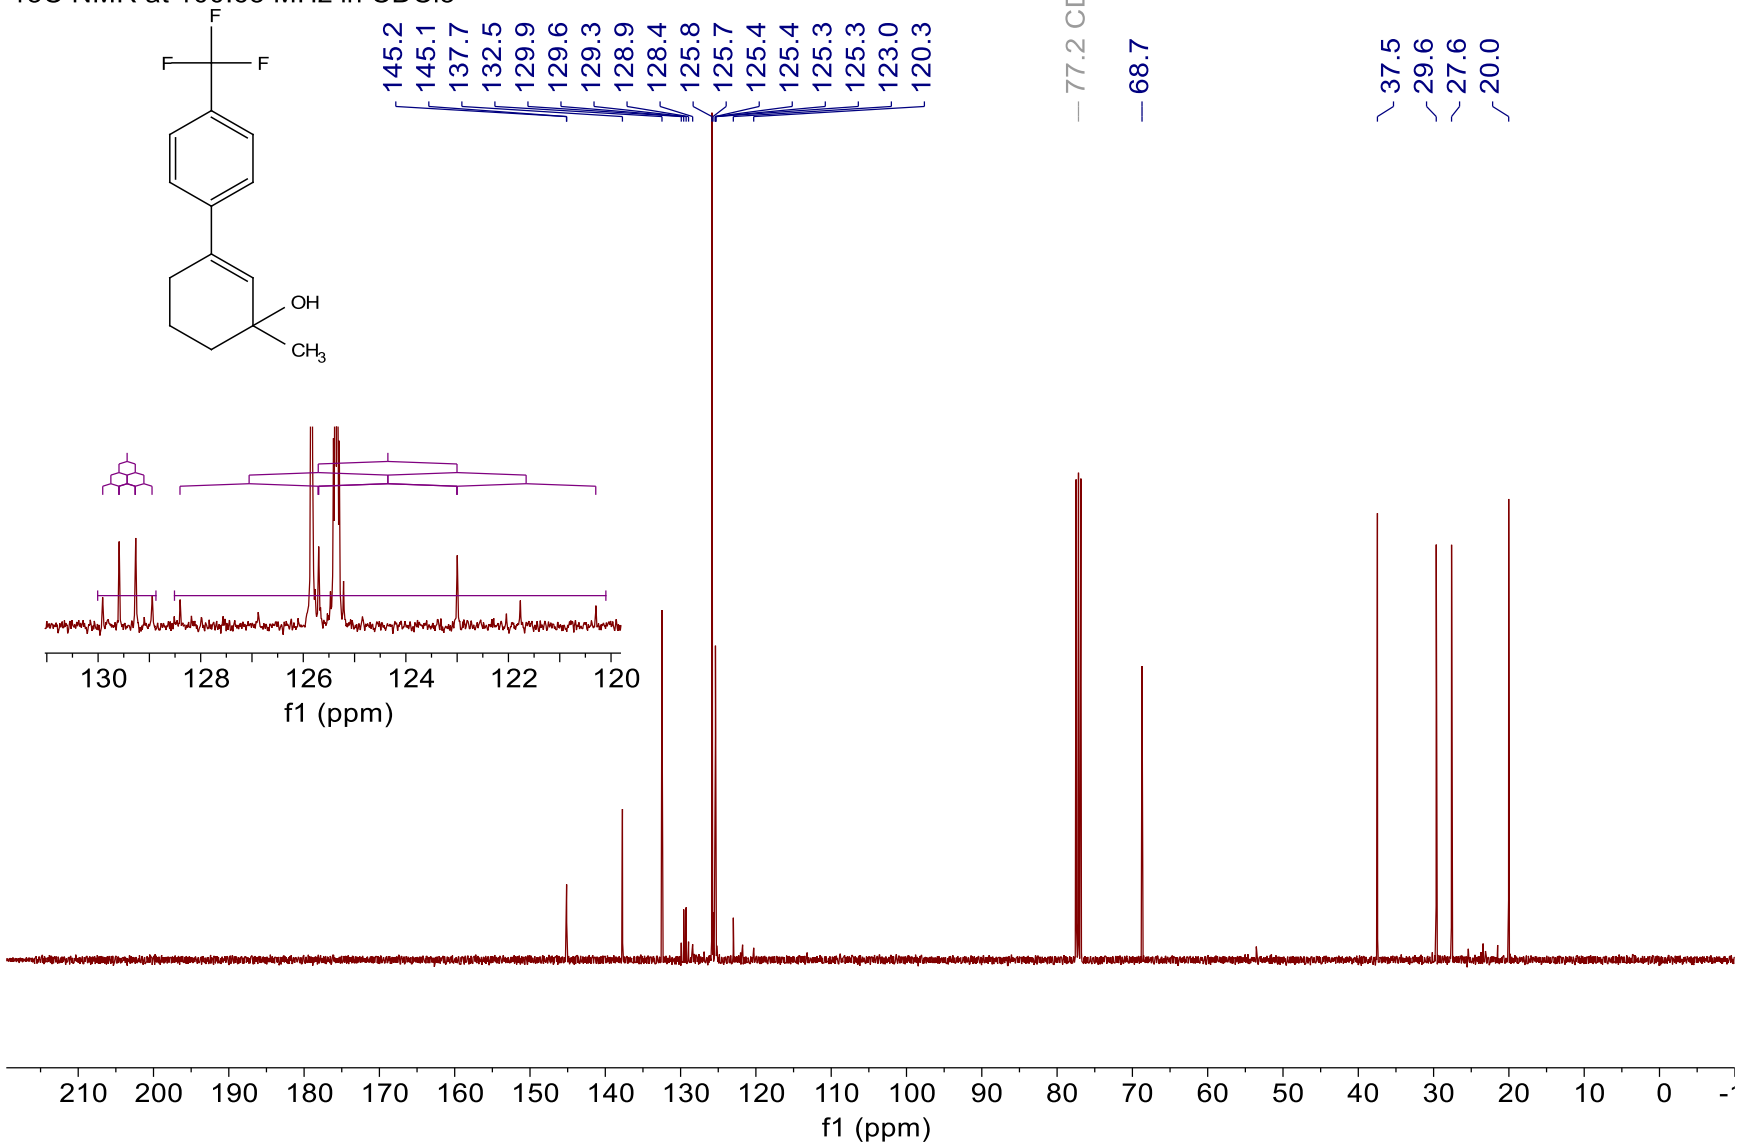

**11b 3-methyl-4'-(trifluoromethyl)-3,4,5,6-tetrahydro-[1,1'-biphenyl]-3-ol**

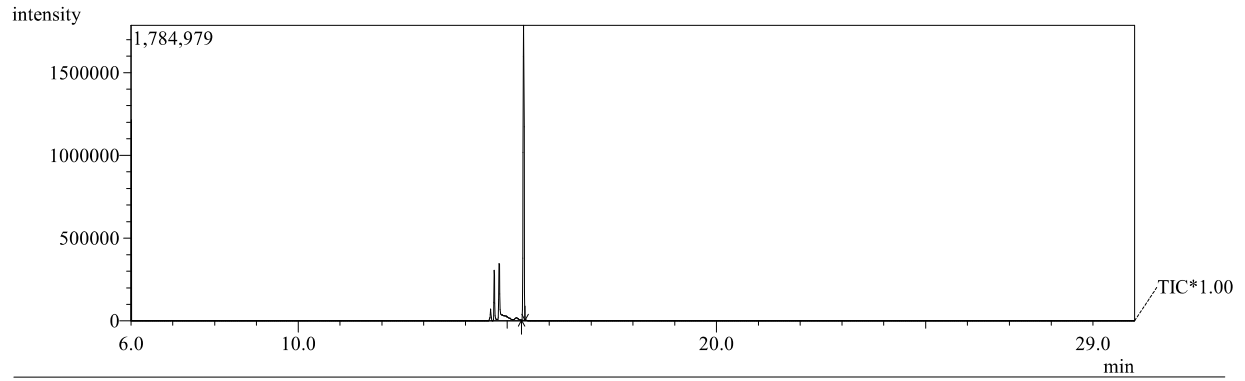

MassPeaks:122  
RawMode:Averaged 15.4-15.4(1127-1129) BasePeak:241(383898)  
BG Mode:Calc. from Peak

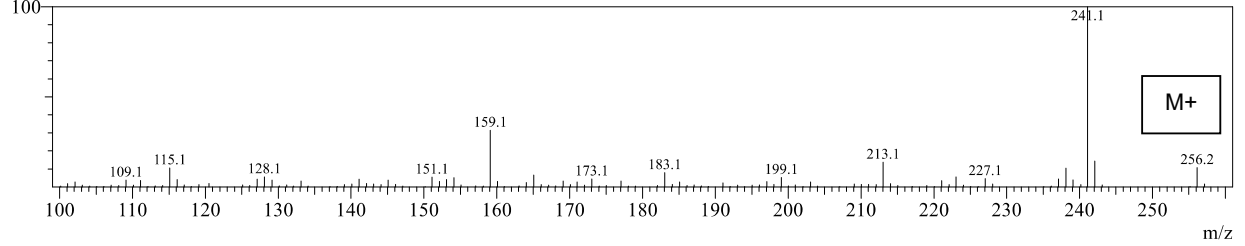

12 6-(4-(trifluoromethyl)phenyl)hept-6-en-2-one  
1H NMR at 400.15 MHz in CDCl3

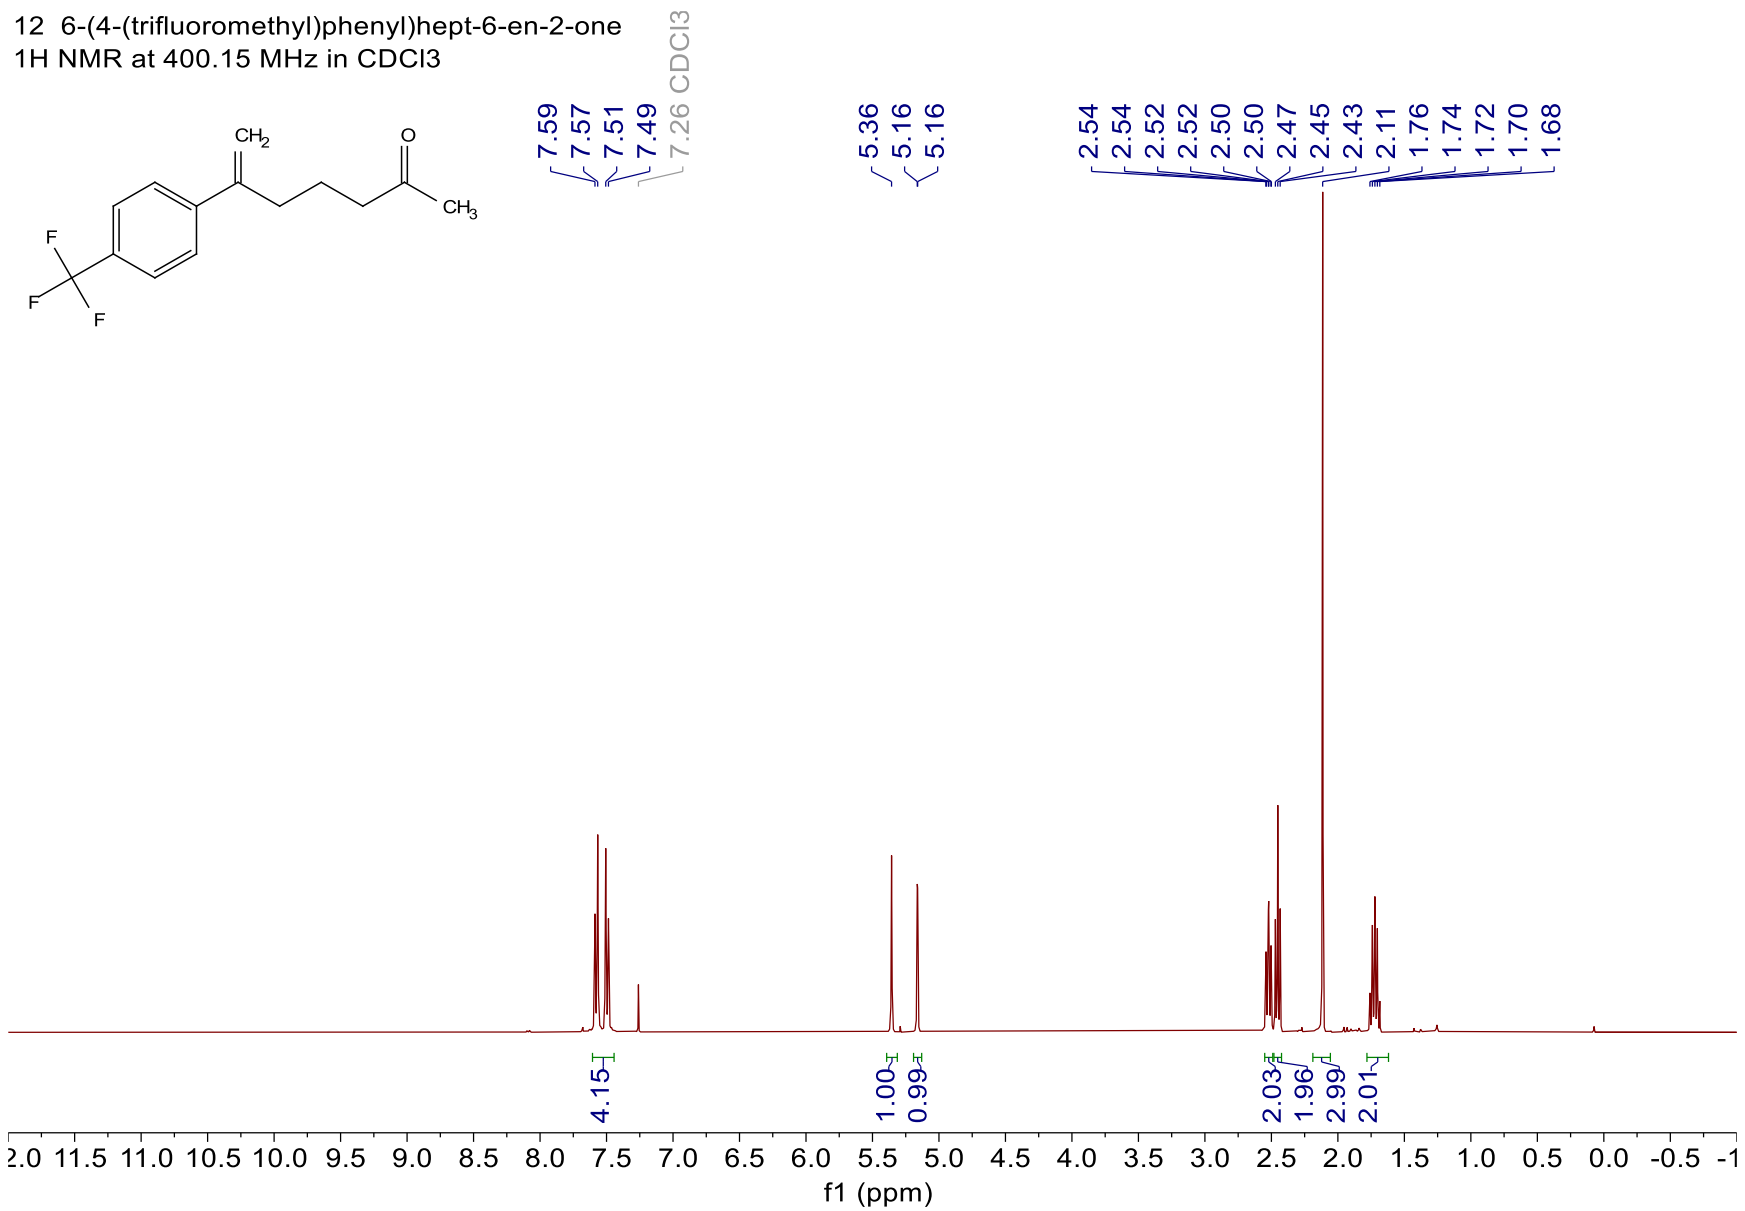

12 6-(4-(trifluoromethyl)phenyl)hept-6-en-2-one  
19F NMR at 376.48 MHz in CDCl3

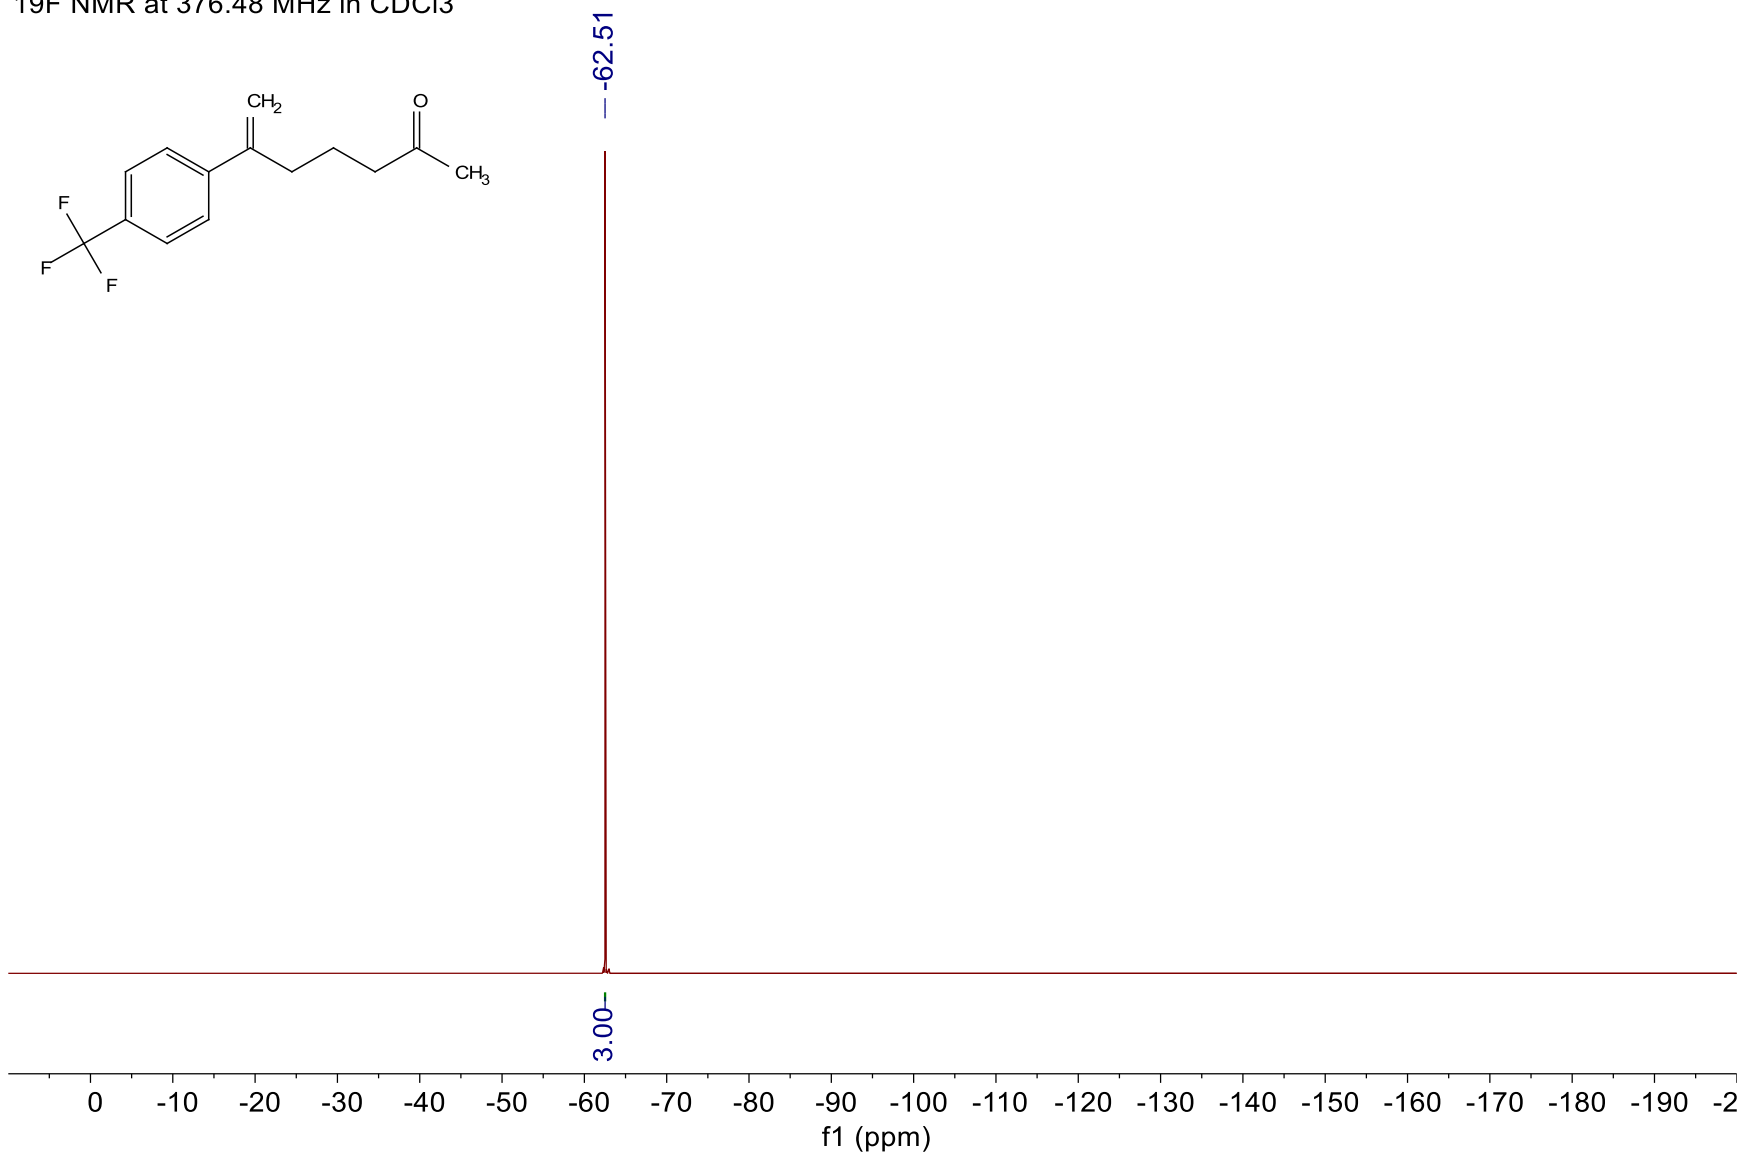



12 6-(4-(trifluoromethyl)phenyl)hept-6-en-2-one  
13C NMR at 100.63 MHz in CDCl3

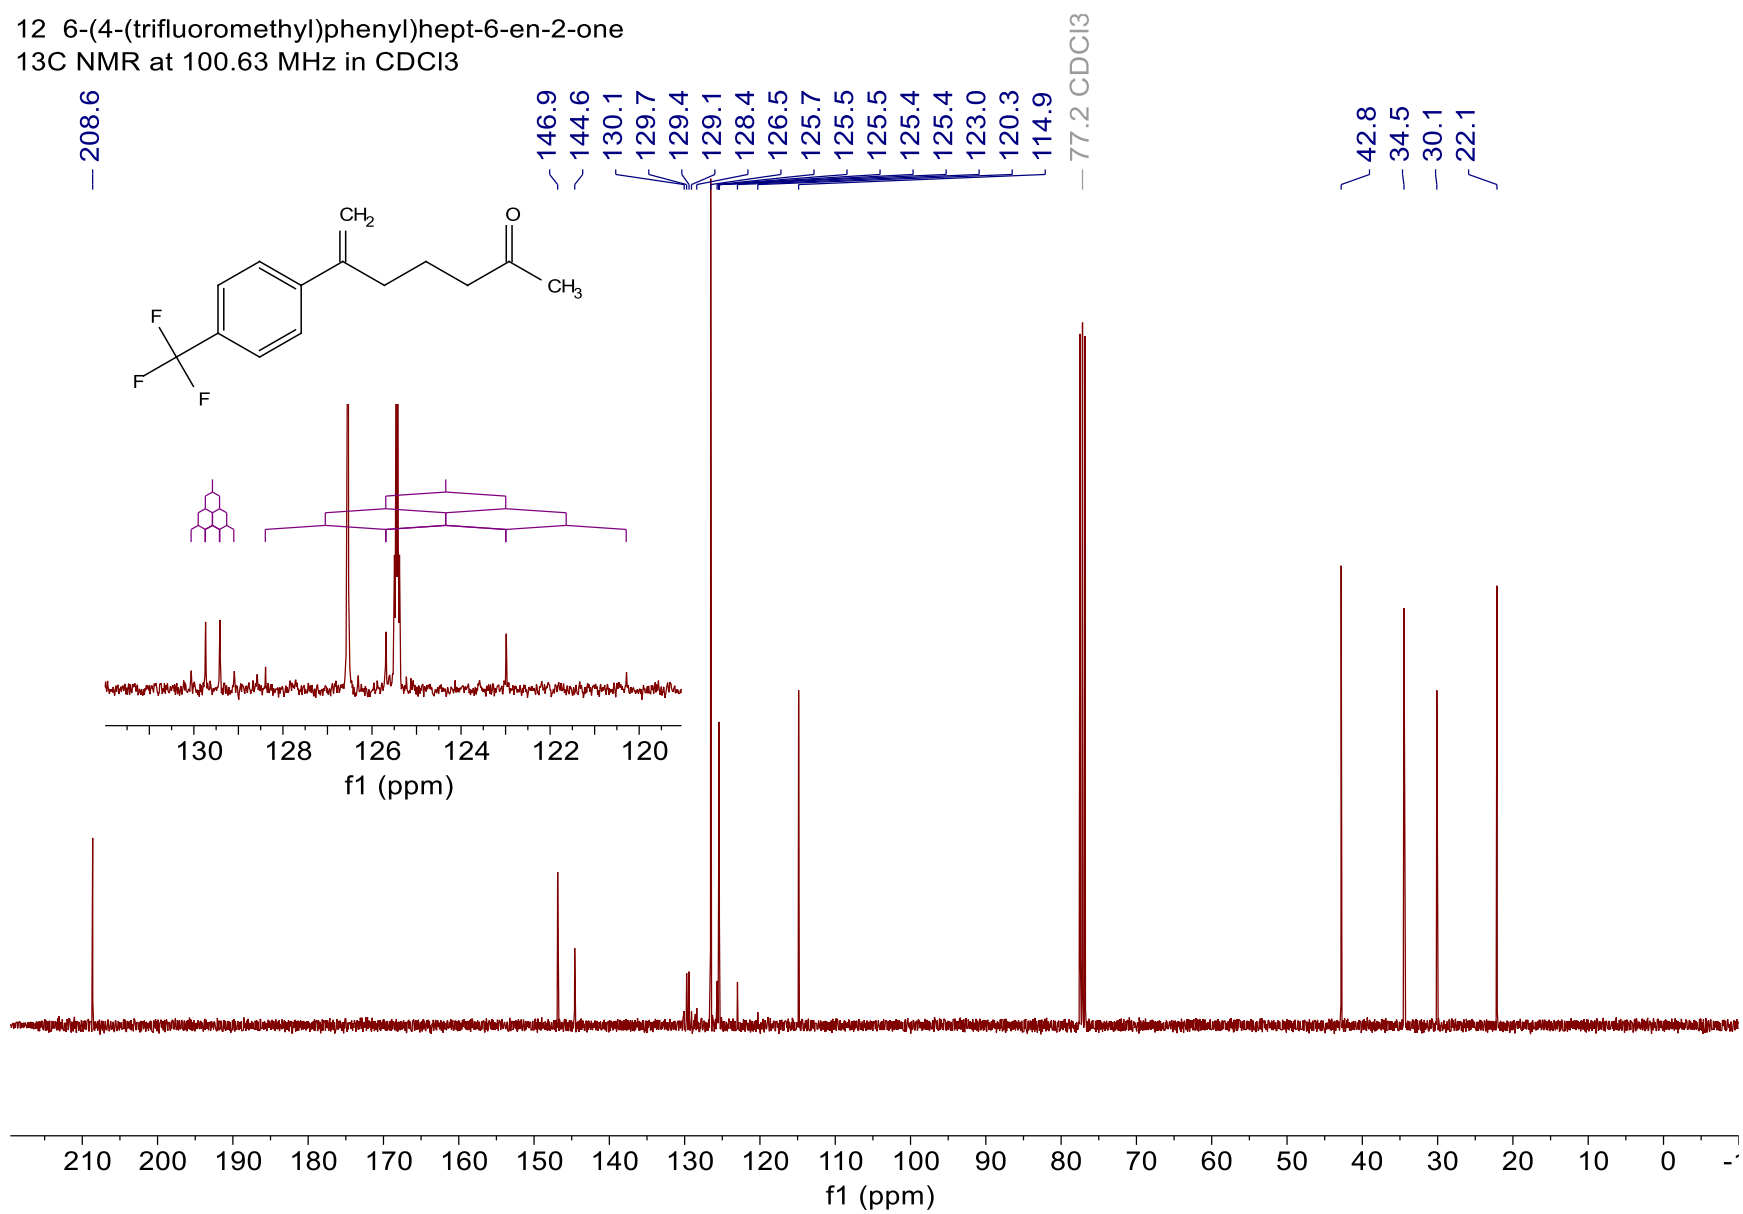

## 12 6-(4-(trifluoromethyl)phenyl)hept-6-en-2-one

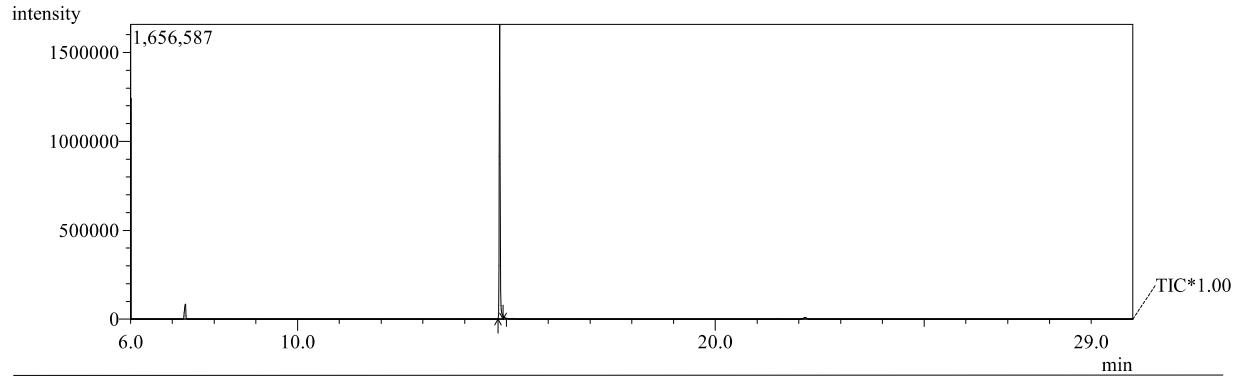

Spectrum

MassPeaks:98  
RawMode:Averaged 14.8-14.9(1061-1063) BasePeak:129(300573)  
BG Mode:Calc. from Peak

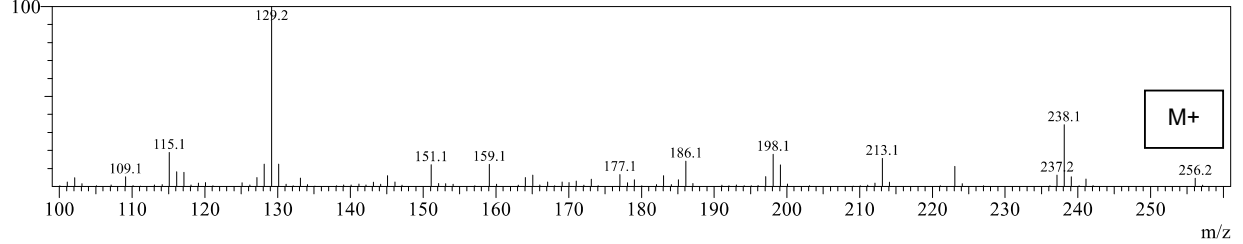

13 (3R,10aR)-1,2,3,9,10,10a-hexahydrophenanthren-3-ol  
1H NMR at 400.15 MHz in CDCl3

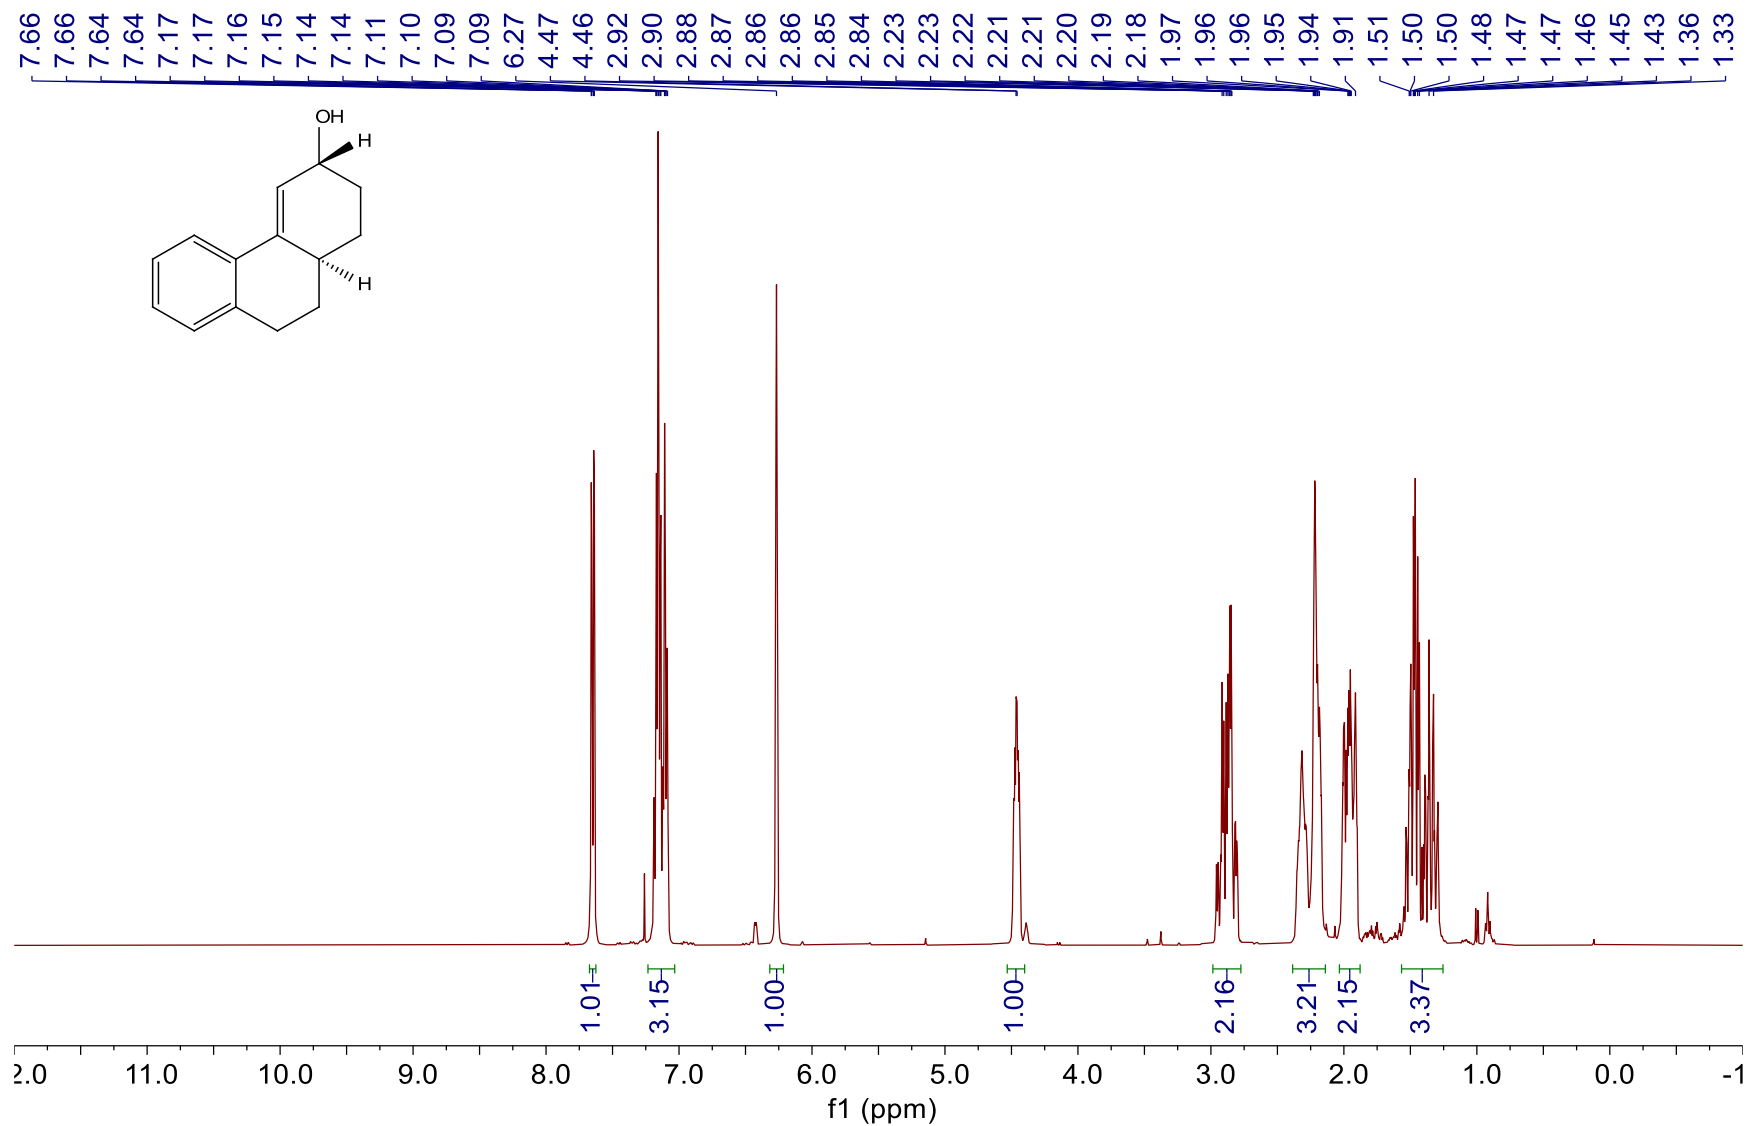

13 (3R,10aR)-1,2,3,9,10,10a-hexahydrophenanthren-3-ol  
13C NMR at 100.63 MHz in CDCl3

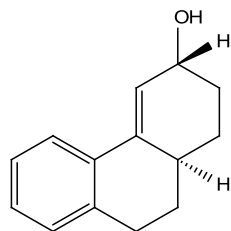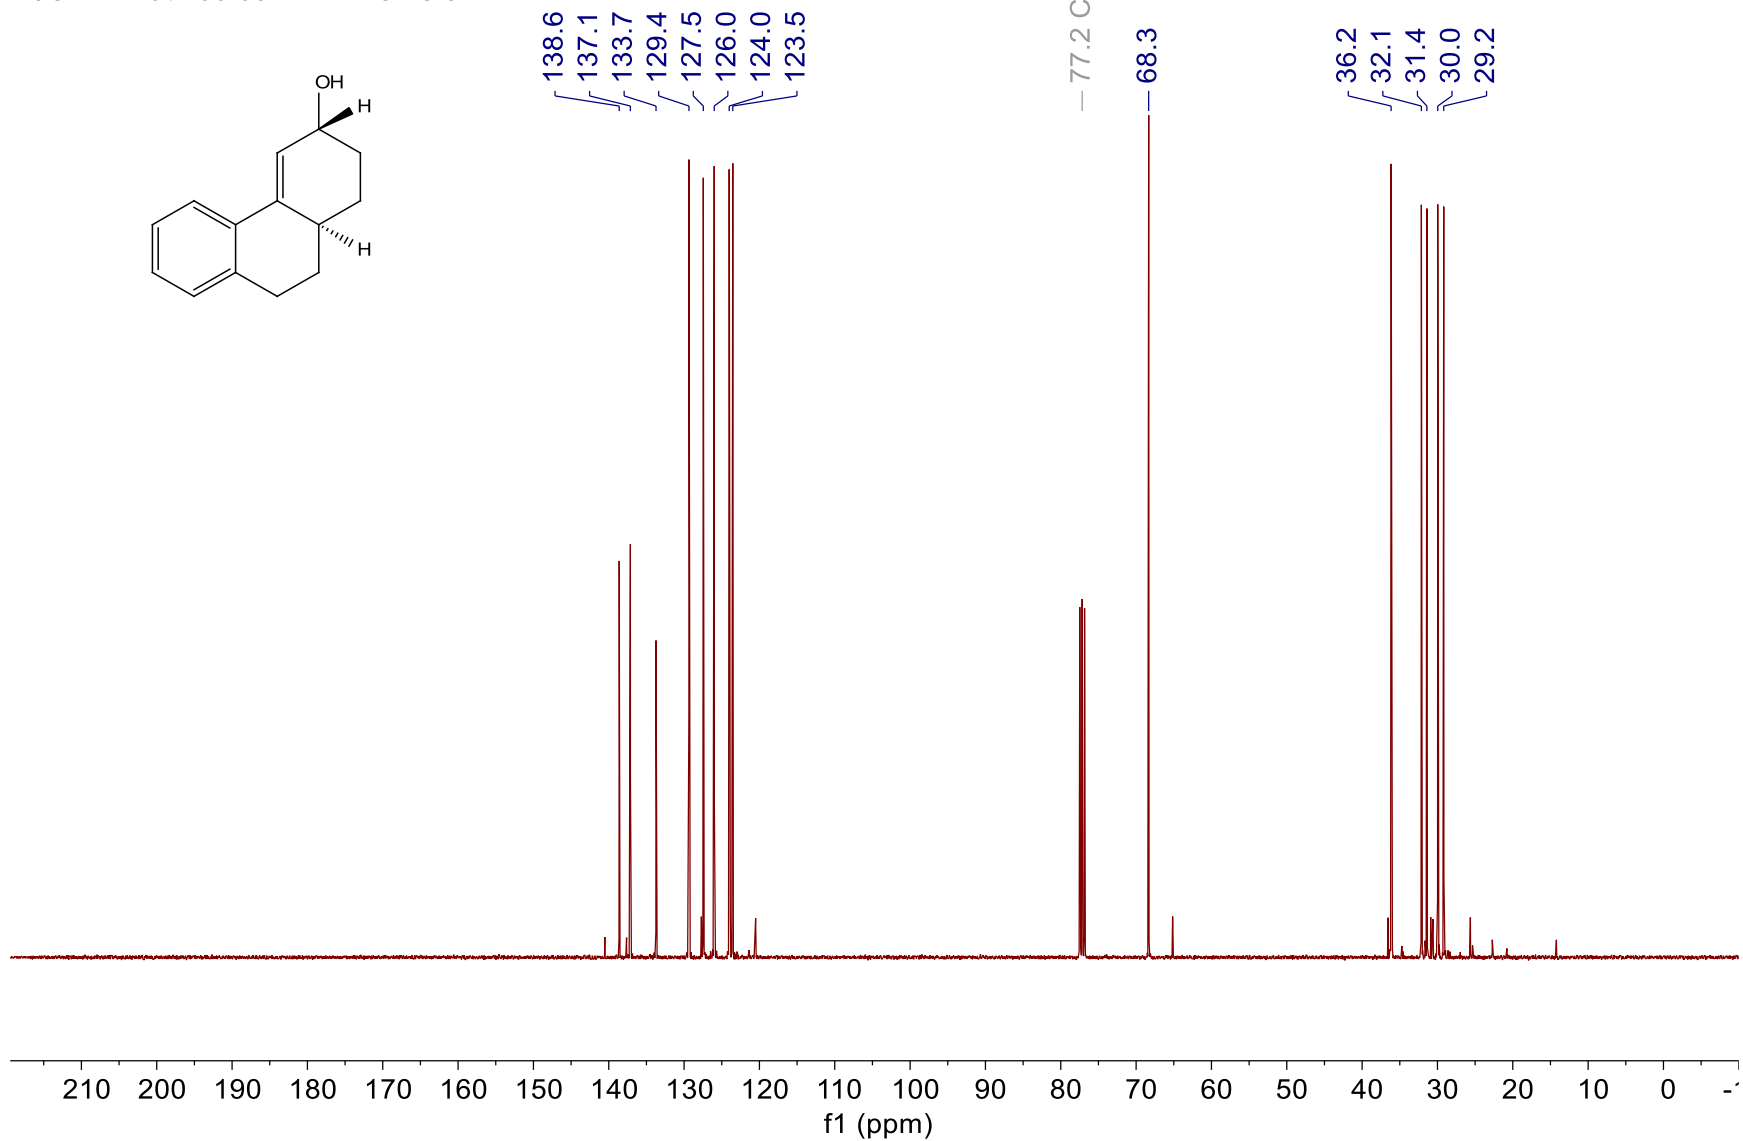

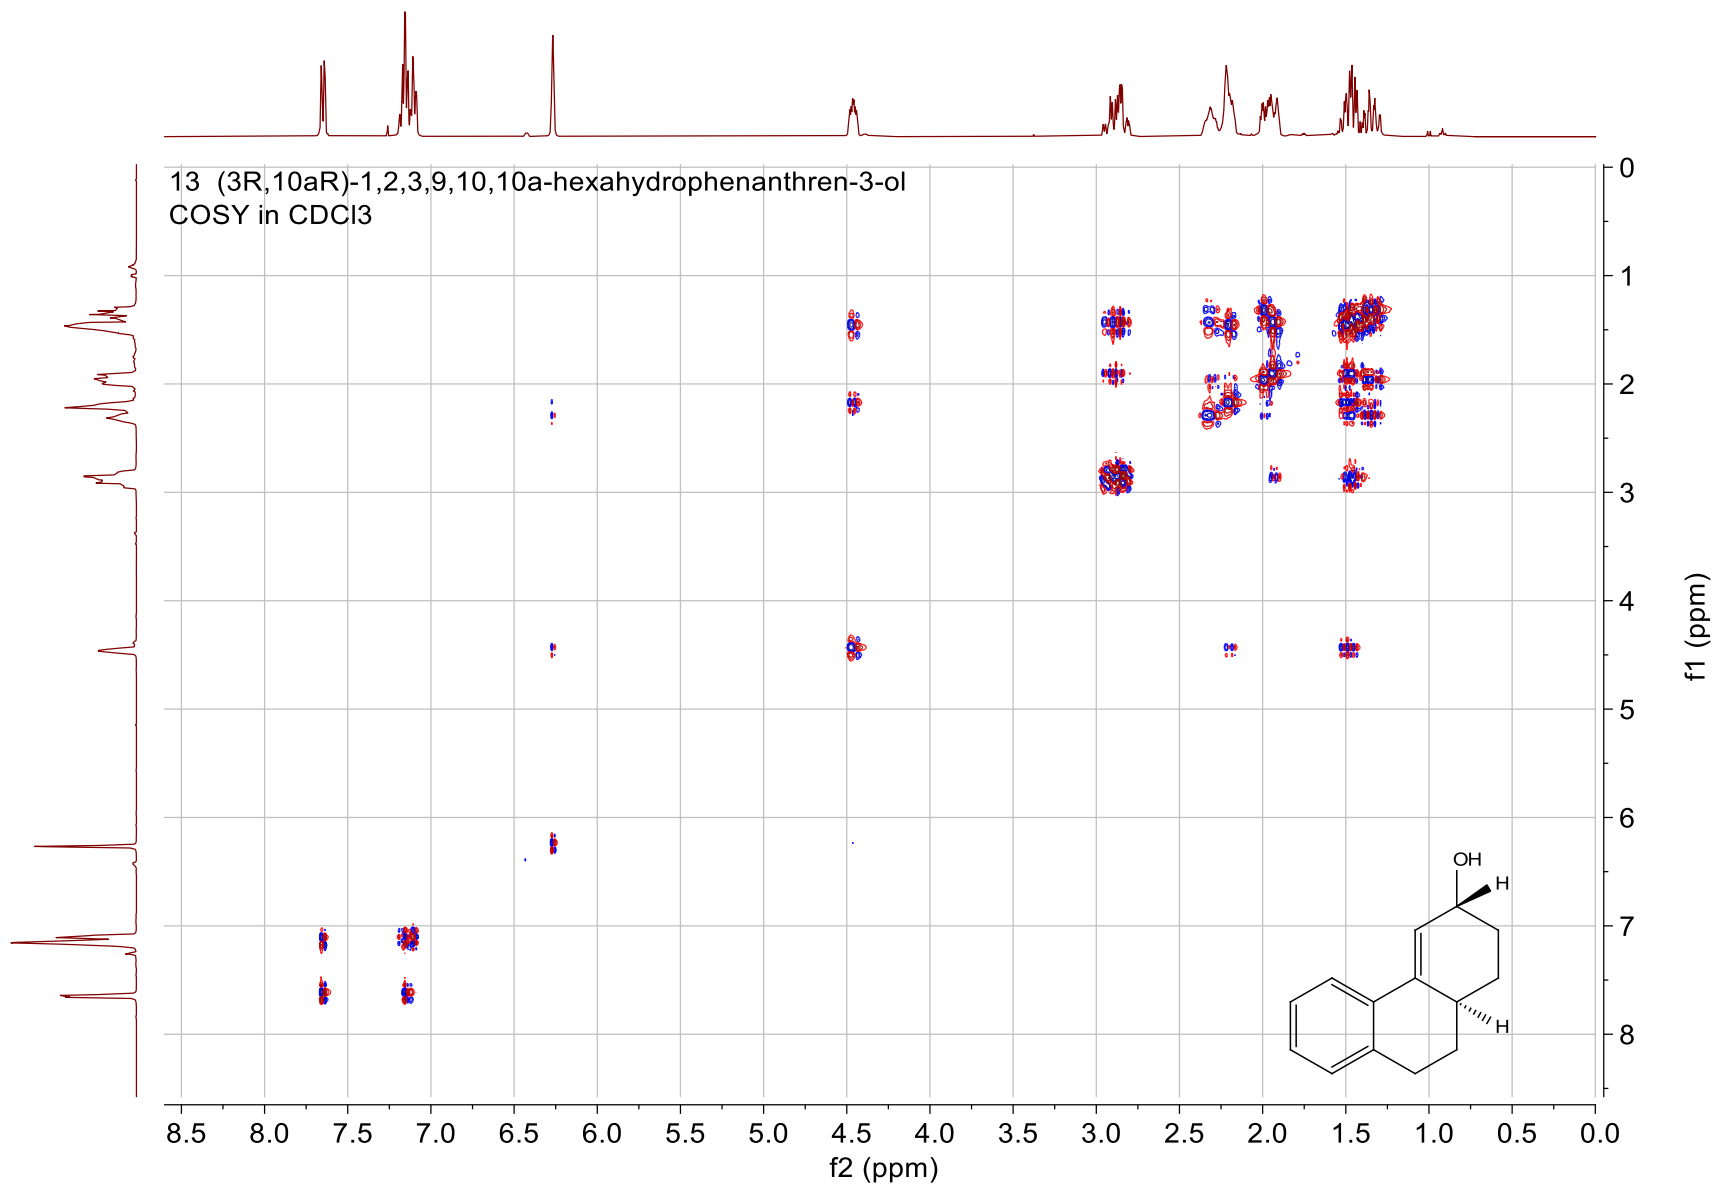

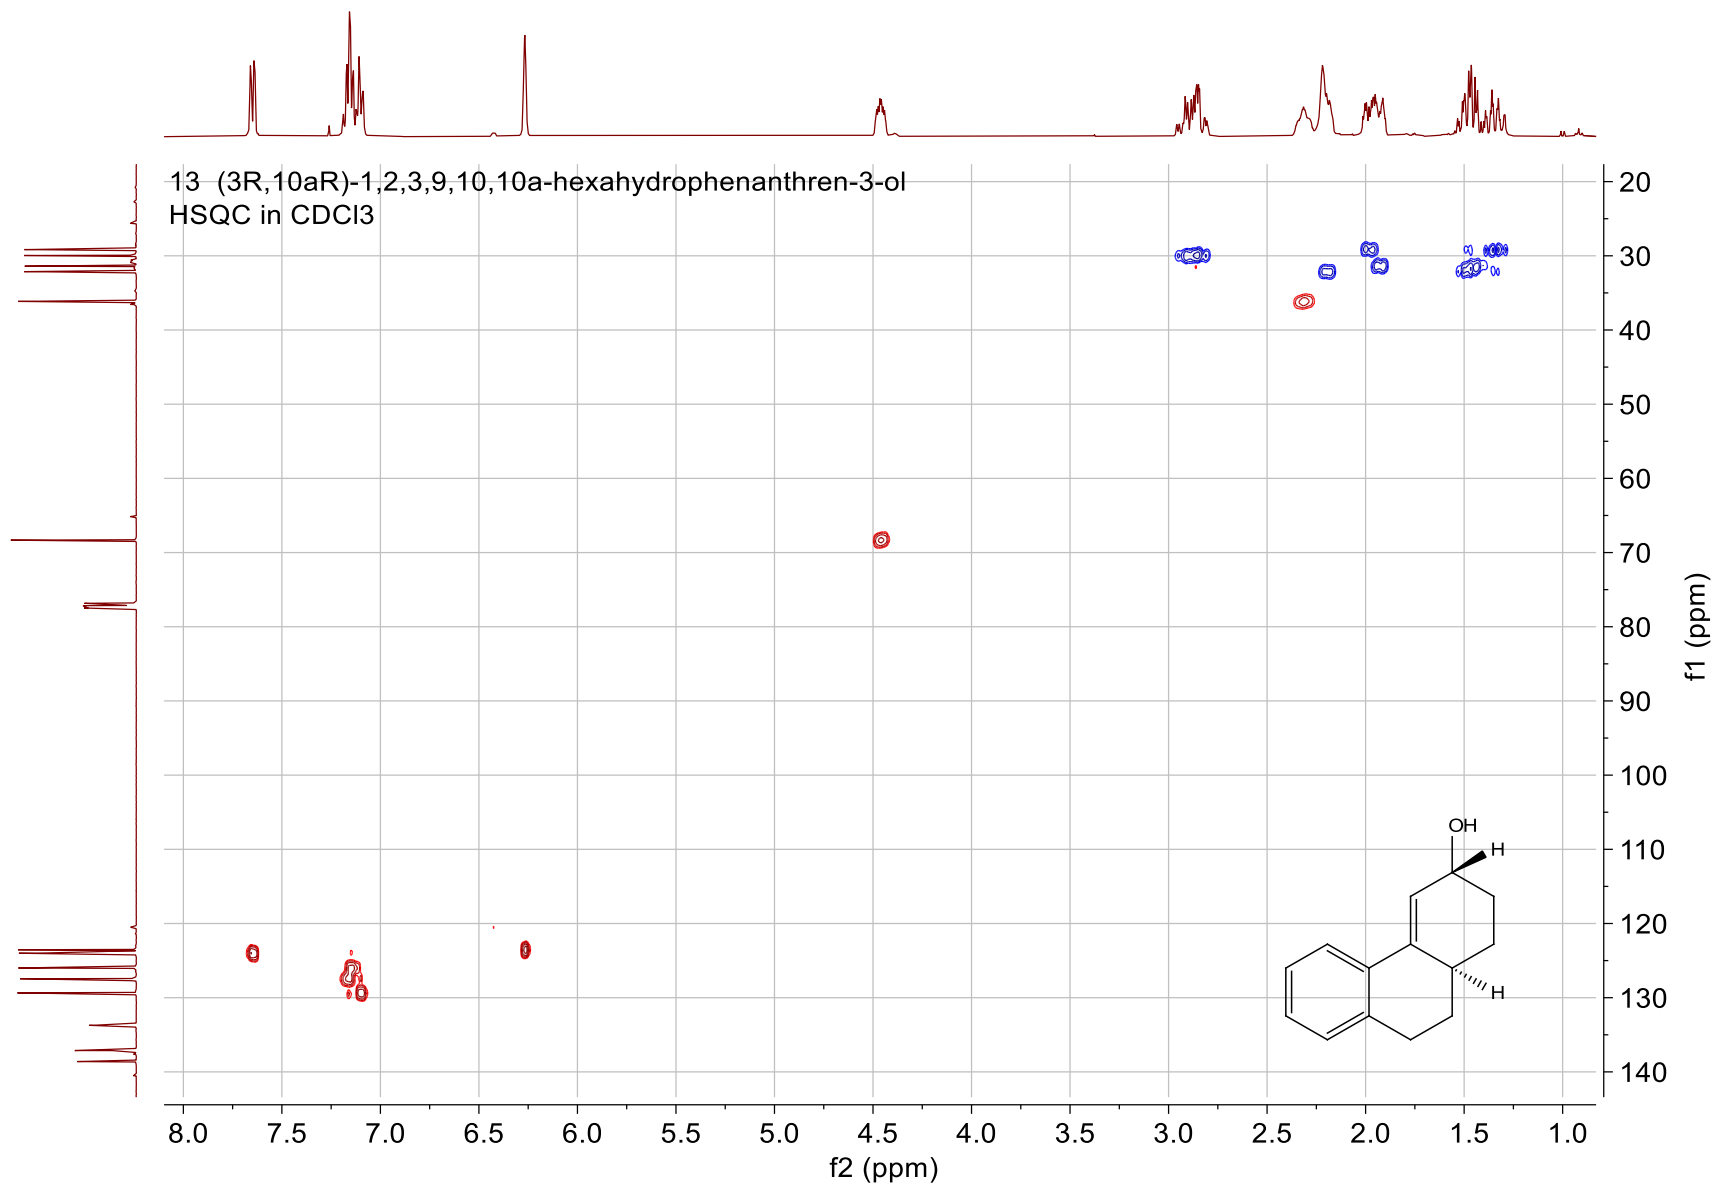

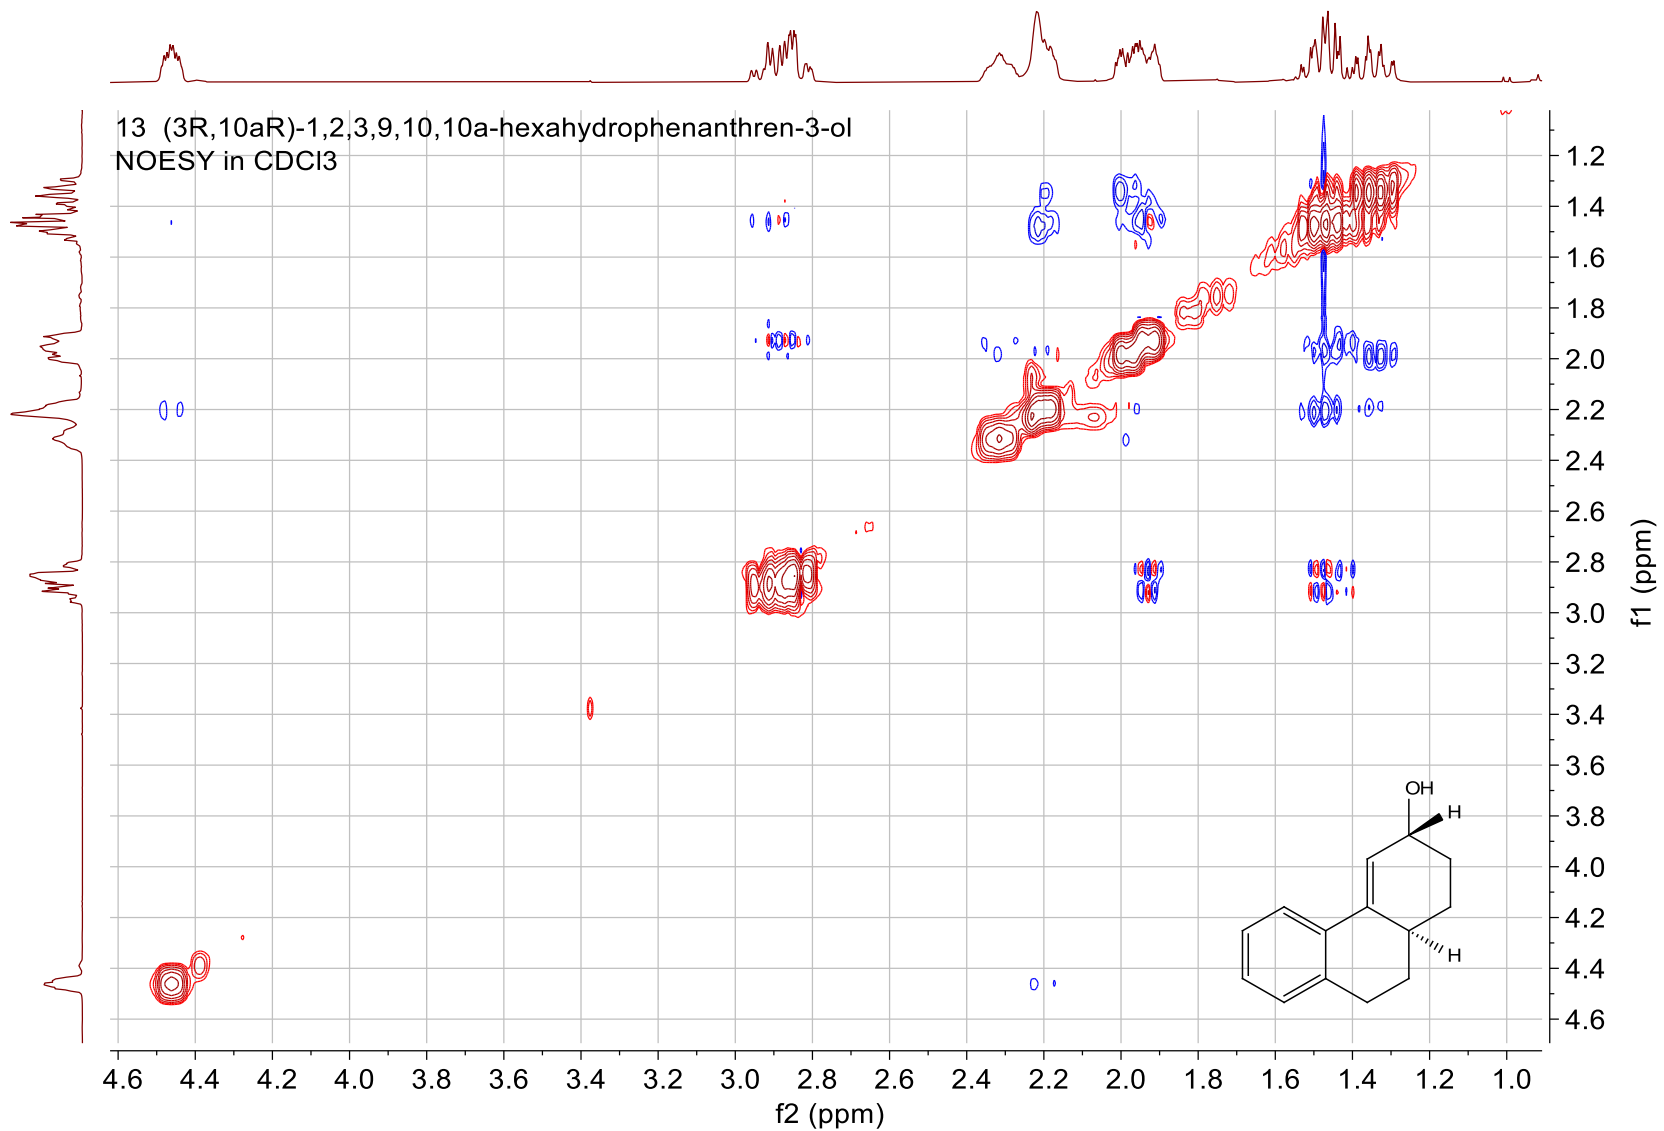

14 3-(1-methylene-1,2,3,4-tetrahydronaphthalen-2-yl)propanal  
1H NMR at 400.15 MHz in CDCl3

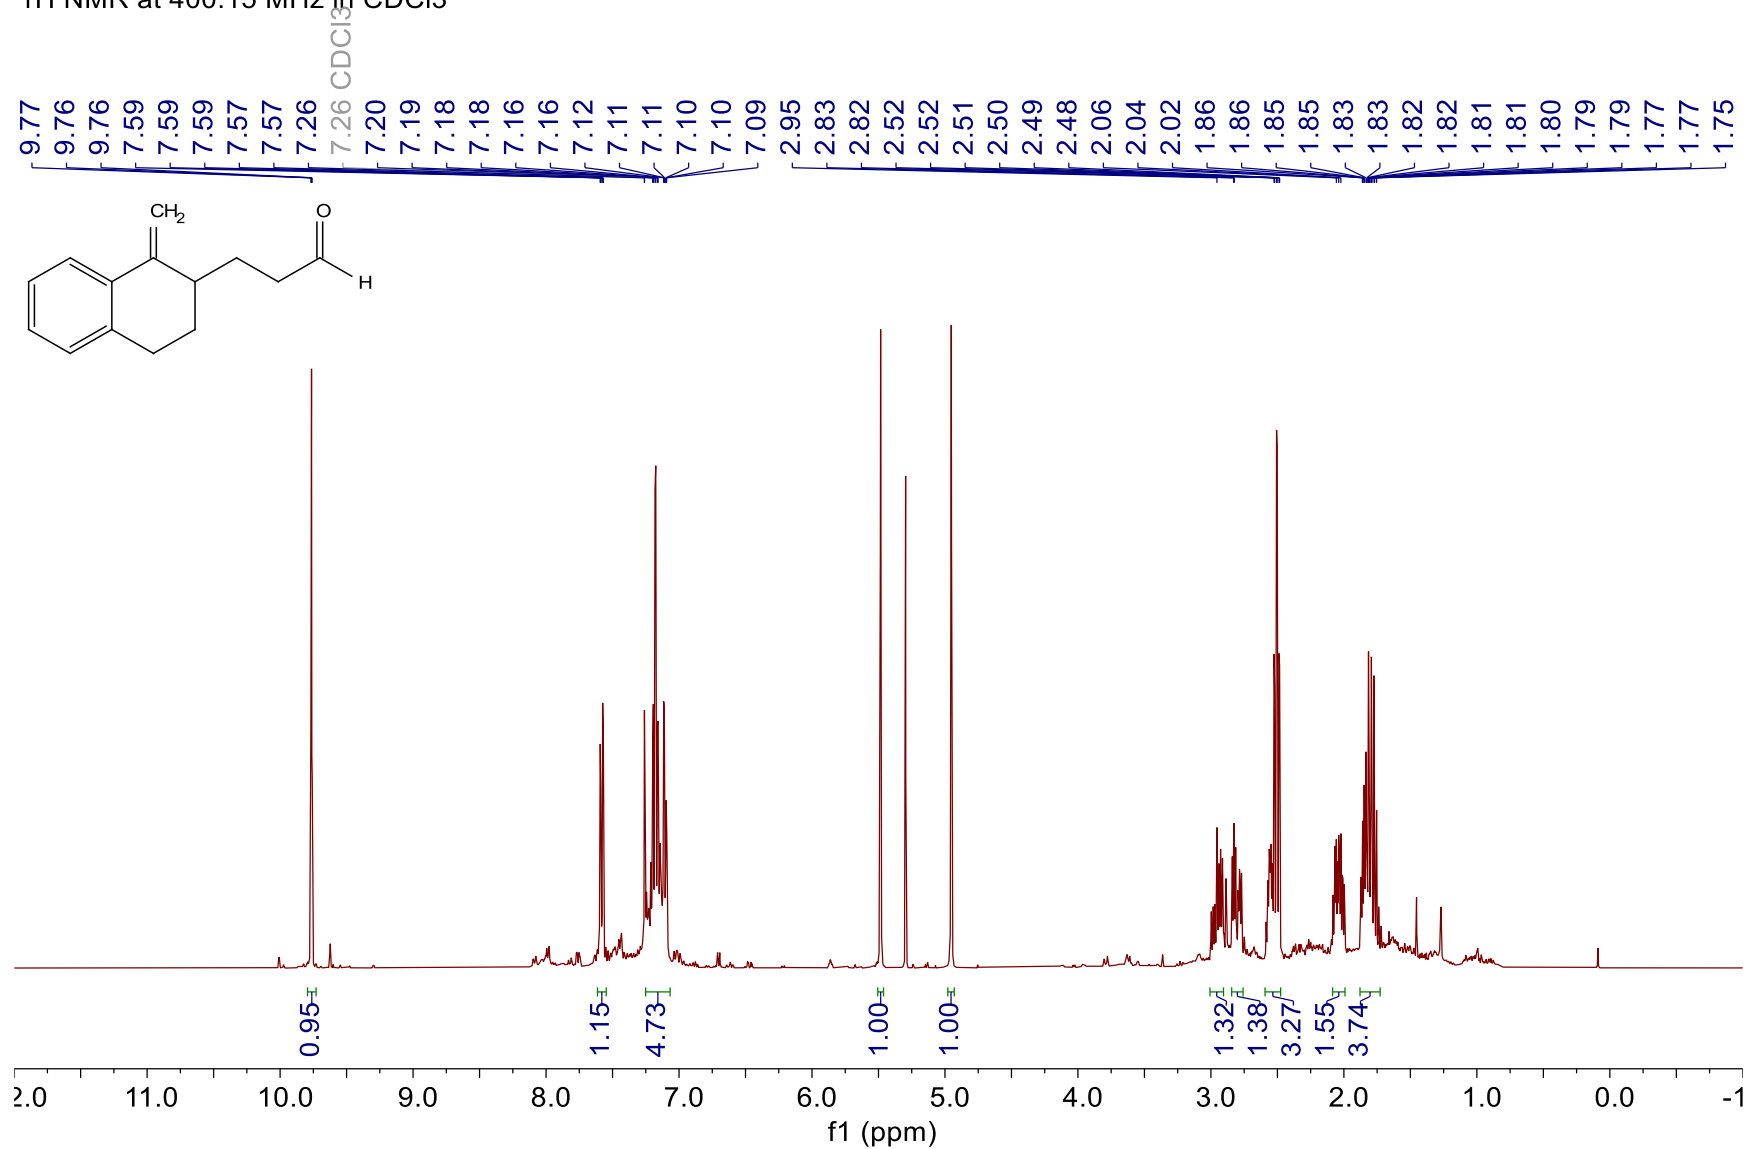



14 3-(1-methylene-1,2,3,4-tetrahydronaphthalen-2-yl)propanal  
13C NMR at 100.63 MHz in CDCl3

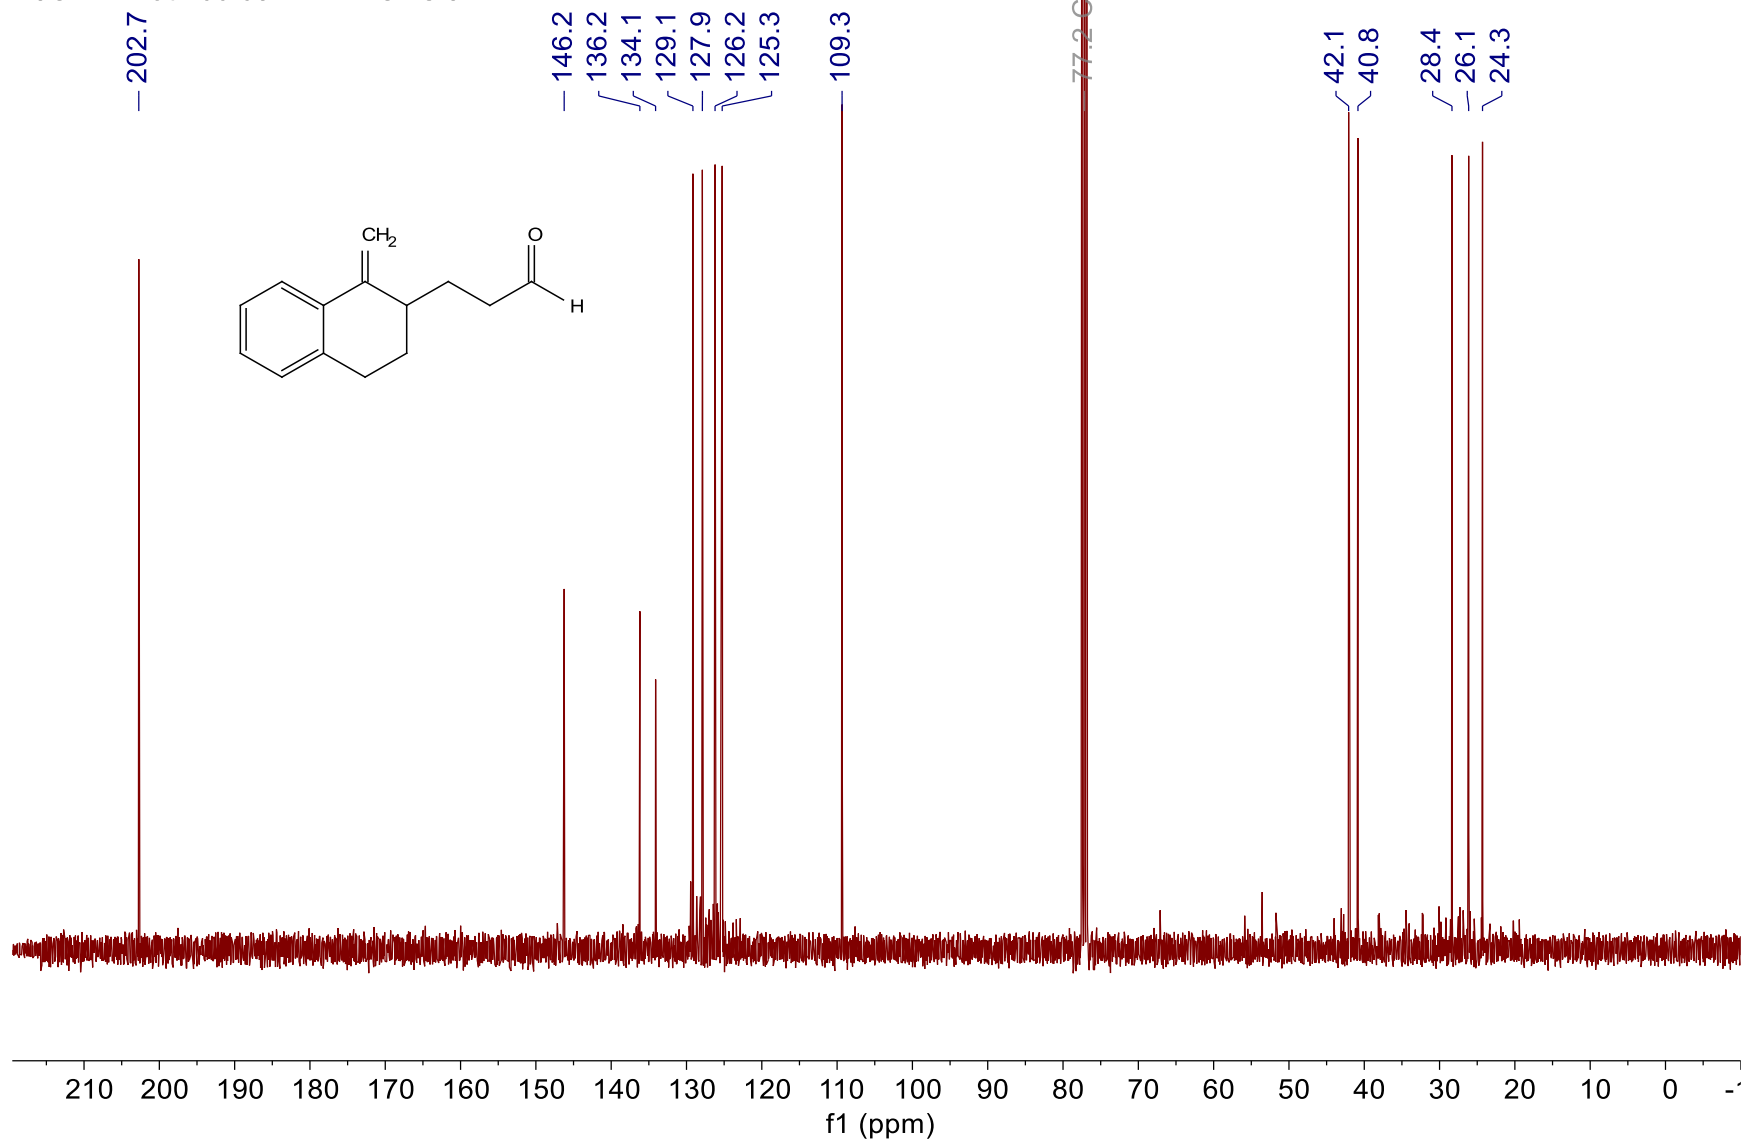

# 14 3-(1-methylene-1,2,3,4-tetrahydronaphthalen-2-yl)propanal

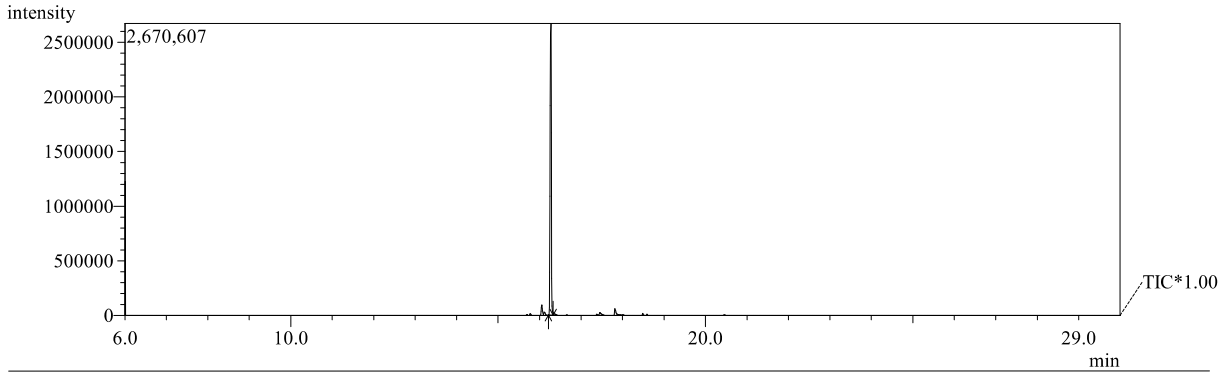

Spectrum

MassPeaks:57  
RawMode:Averaged 16.3-16.3(1233-1235) BasePeak:129(458221)  
BG Mode:Calc. from Peak

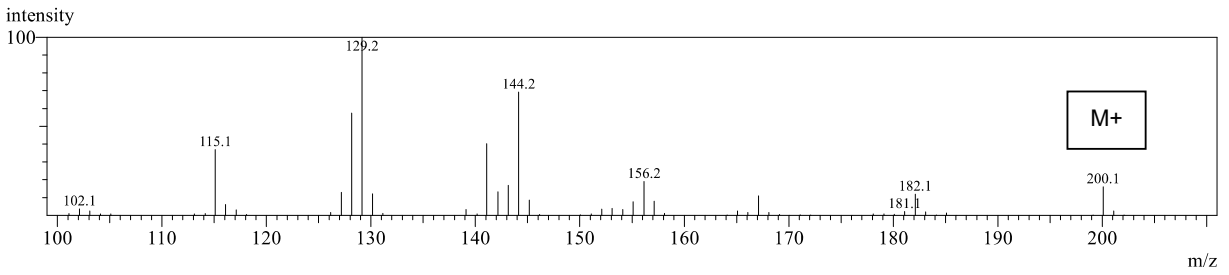

## VIII. References

- (1) Singh, A.; Teegardin, K.; Kelly, M.; Prasad, K. S.; Krishnan, S.; Weaver, J. D. Facile synthesis and complete characterization of homoleptic and heteroleptic cyclometalated Iridium(III) complexes for photocatalysts. *J. Organomet. Chem.* 2015, **776**, 51-59.
- (2) Lujan-Montelongo, J. A.; Fleming, F. F. Preparation of 3-Oxocyclohex-1-ene-1-carbonitrile. *Org. Synth.* 2013, **90**, 229-239.
- (3) Shibuya, M.; Tomizawa, M.; Iwabuchi, Y. TEMPO/NaIO<sub>4</sub>—SiO<sub>2</sub>: A Catalytic Oxidative Rearrangement of Tertiary Allylic Alcohols to  $\beta$ -Substituted  $\alpha,\beta$ -Unsaturated Ketones. *Org. Lett.* 2008, **10** (21), 4715-4718.
- (4) Wagh, S. J.; Chowdhury, R.; Ghosh, S. K. Pyrrolidine Catalyzed Direct Synthesis of 3,5-Diarylcyclohexenones from Acetone and Chalcones. *Curr. Organocatal.* 2014, **1** (2), 71-78.
- (5) Latorre, A.; Urbano, A.; Carreño, M. C. Dynamic kinetic resolution in the asymmetric synthesis of atropisomeric biaryl[4] and [5]helicene quinones. *Chem. Commun.* 2009, **43**, 6652-6654.
- (6) Zhong, Y.; Shing, T. K. M. Efficient and Facile Glycol Cleavage Oxidation Using Improved Silica Gel-Supported Sodium Metaperiodate. *J. Org. Chem.* 1997, **62** (8), 2622-2624. <https://doi.org/10.1021/jo9621581>.
- (7) Frisch, M. J.; Trucks, G. W.; Schlegel, H. B.; Scuseria, G. E.; Robb, M. A.; Cheeseman, J. R.; Scalmani, G.; Barone, V.; Mennucci, B.; Petersson, G. A.; Nakatsuji, H.; Caricato, M.; Li, X.; Hratchian, H. P.; Izmaylov, A. F.; Bloino, J.; Zheng, G.; Sonnenberg, J. L.; Hada, M.; Ehara, M.; Toyota, K.; Fukuda, R.; Hasegawa, J.; Ishida, M.; Nakajima, T.; Honda, Y.; Kitao, O.; Nakai, H.; Vreven, T.; Montgomery Jr., J. A.; Peralta, J. E.; Ogliaro, F.; Bearpark, M.; Heyd, J. J.; Brothers, E.; Kudin, K. N.; Staroverov, V. N.; Kobayashi, R.; Normand, J.; Raghavachari, K.; Rendell, A.; Burant, J. C.; Iyengar, S. S.; Tomasi, J.; Cossi, M.; Rega, N.; Millam, J. M.; Klene, M.; Knox, J. E.; Cross, J. B.; Bakken, V.; Adamo, C.; Jaramillo, J.; Gomperts, R.; Stratmann, R. E.; Yazyev, O.; Austin, A. J.; Cammi, R.; Pomelli, C.; Ochterski, J. W.; Martin, R. L.; Morokuma, K.; Zakrzewski, V. G.; Voth, G. A.; Salvador, P.; Dannenberg, J. J.; Dapprich, S.; Daniels, A. D.; Farkas, Ö.; Foresman, J. B.; Ortiz, J. V.; Cioslowski, J.; Fox, D. J. Gaussian 09, Revision C.01, Gaussian, Inc. Wallingford CT. Gaussian, Inc. Wallingford CT. 2009.
- (8) Cramer, C. Essentials of Computational Chemistry: Theories and Models, 2nd ed.; John Wiley & Sons, 2004.
- (9) Lee, C.; Yang, W.; Parr, R. G. Development of the Colle-Salvetti correlation-energy formula into a functional of the electron density. *Phys. Rev. B. Condens. Matter.* 1988, **37** (2), 785-789. <https://doi.org/10.1103/physrevb.37.785>.

- (10) Becke, A. D. Density-functional thermochemistry. III. The role of exact exchange. *J. Chem. Phys.* 1993, **98**, 5648-5652. <https://doi.org/10.1063/1.464913>.
- (11) Day, J. I.; Singh, K.; Trinh, W.; Weaver, J. D. Visible Light Mediated Generation of Trans-Arylcyclohexenes and Their Utilization in the Synthesis of Cyclic Bridged Ethers. *J. Am. Chem. Soc.* 2018, **140** (31), 9934–9941. <https://doi.org/10.1021/jacs.8b04642>.
